# Supplementary material for: Secretome Analysis Performed During in vitro Cardiac Differentiation: Discovering the Cardiac Microenvironment
Source: PubMed Central journal article supplement (PMC7025591; doi:10.3389/fcell.2020.00049), 2020-02-07
Supplement: Data_Sheet_1.pdf [file Data_Sheet_1.pdf]

## Supplementary Figures

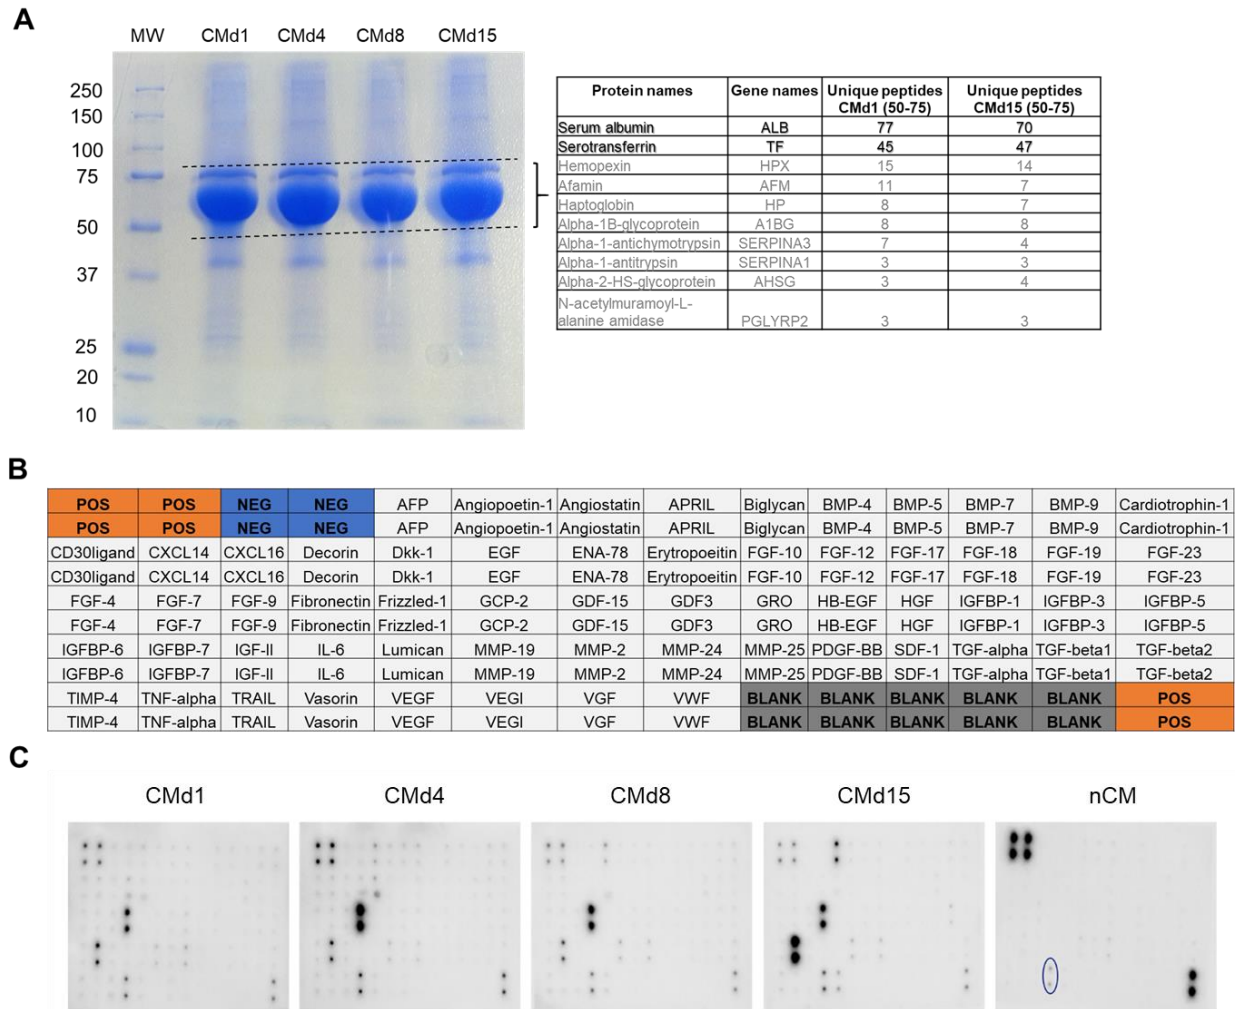

**Supplementary figure 1:** Analysis of conditioned medium obtained during cardiac differentiation. A) Representative image of 10% SDS-PAGE of CMs samples, indicating the region of 50-75 kDa (dotted line) which corresponds to the mass spectrometry protein identification in table (right). B) Map of proteins on array of custom antibody array. C) Representative images of array after CMs incubation and detection.

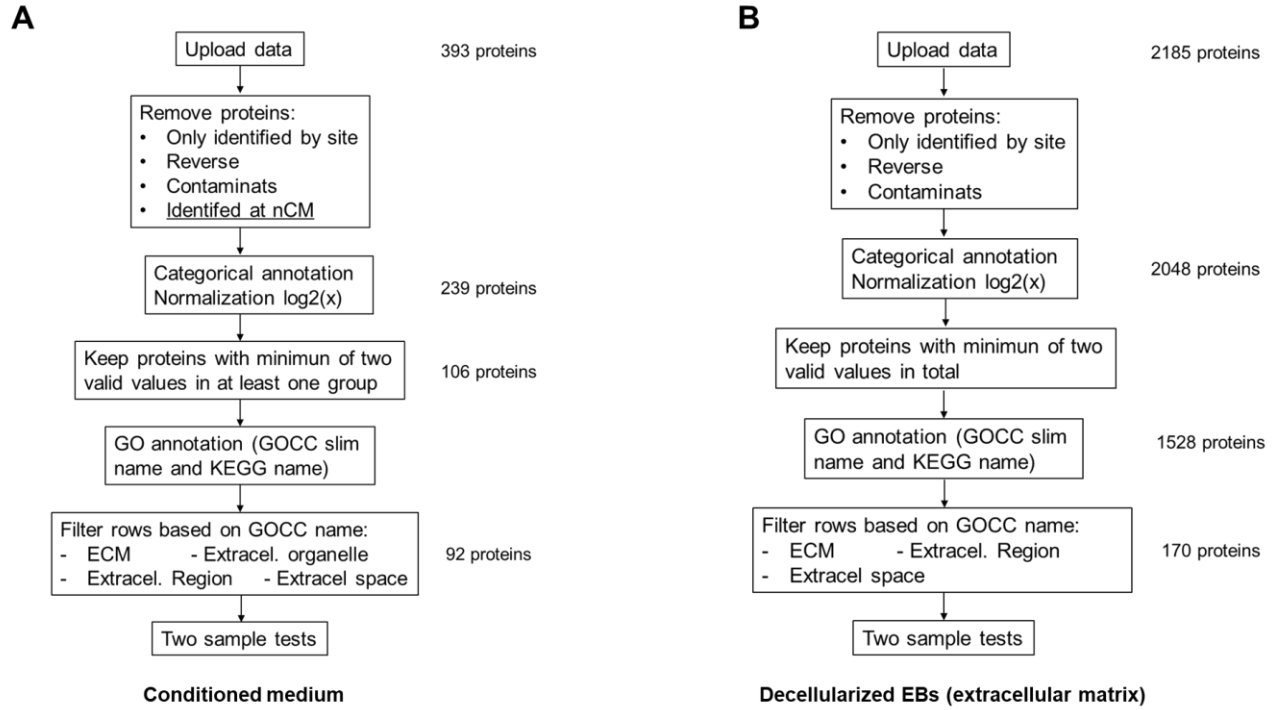

**Supplementary figure 2:** Analysis steps of mass spectrometry data, at Perseus, from CMs (A) and ECM samples (B).

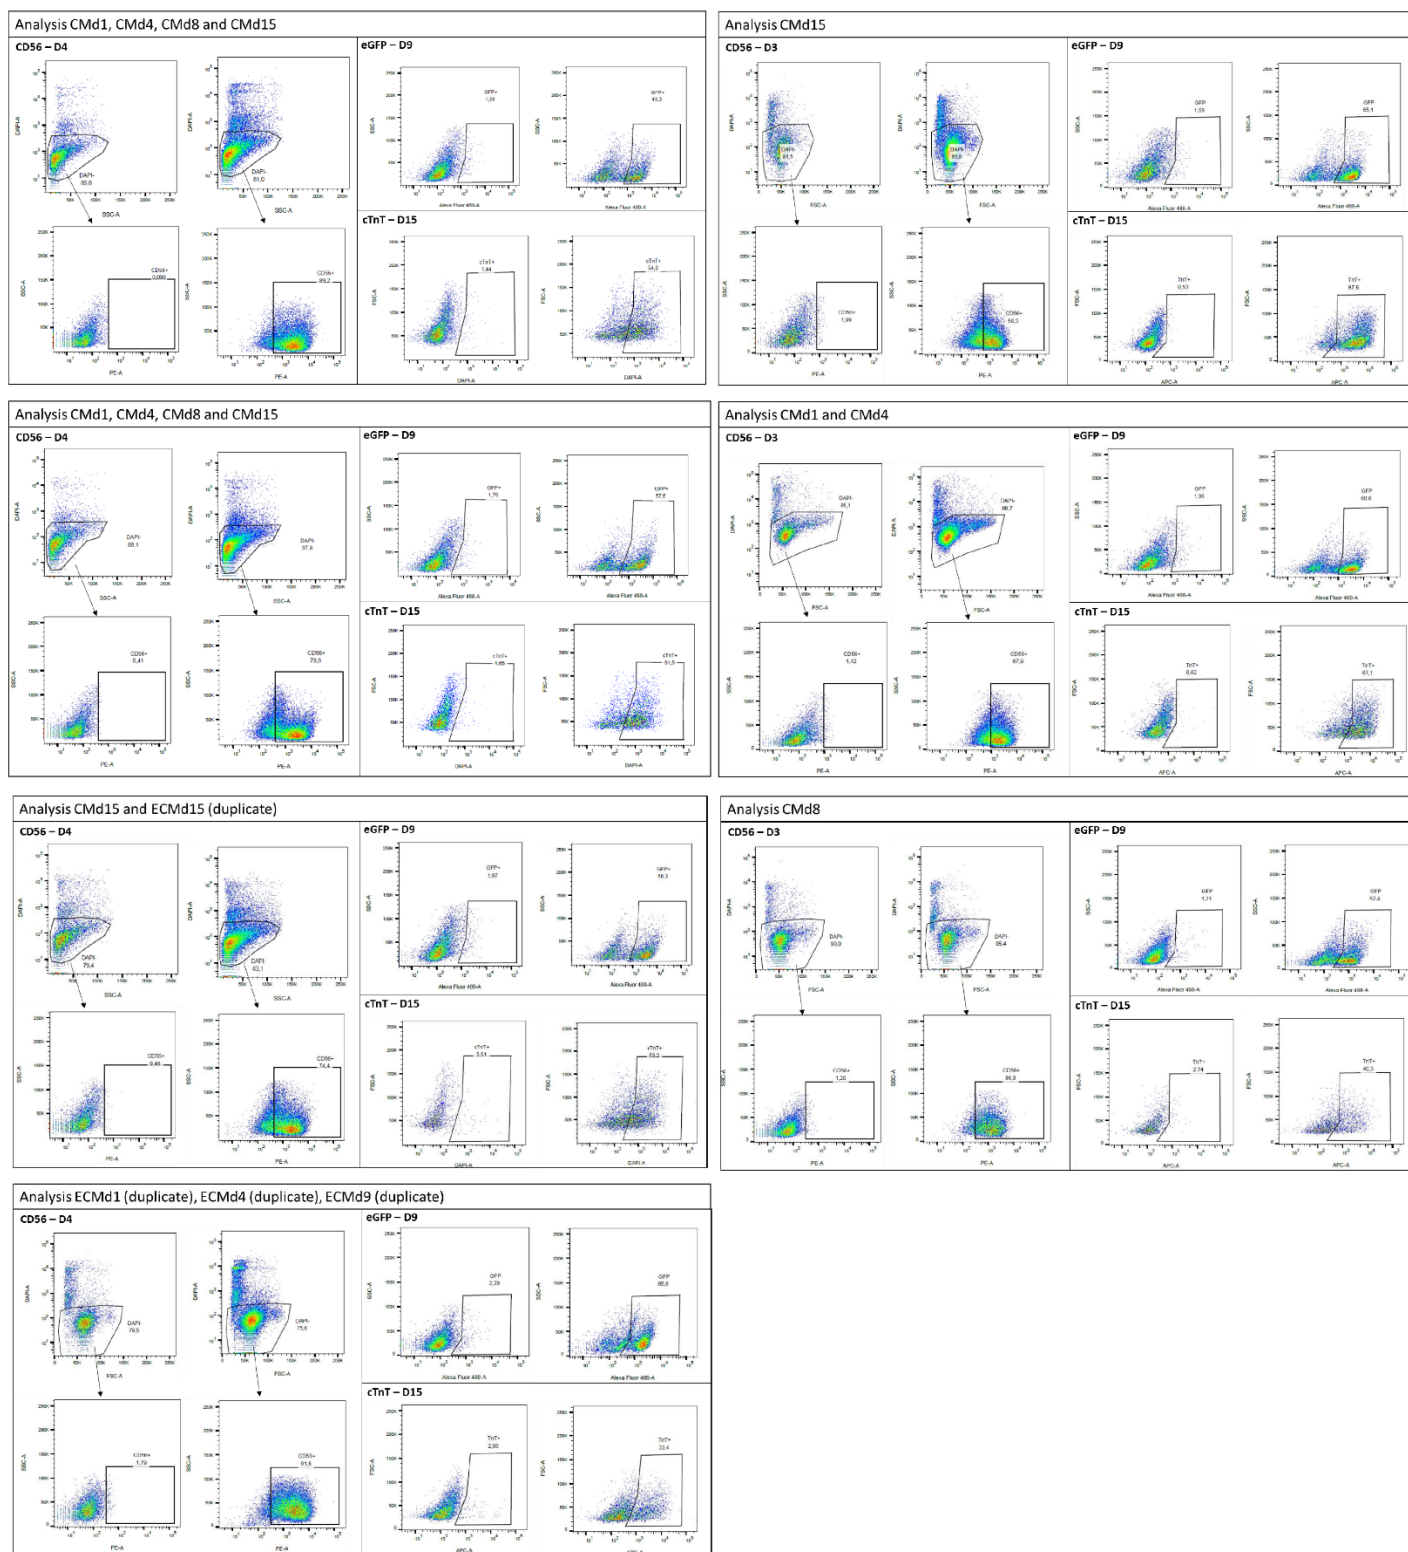

**Supplementary figure 3:** Representative dot plots of flow cytometry analysis of the following markers: CD56 (day 3), eGFP/Nkx2.5 (day 9) and cTnT (day 15) of all experiments used to collected CM or ECM. In the top of each frame/ experiment it is indicated which time-point (chosen based on the% of stained cells at the time-point) was analyzed by mass spectrometry or antibody array.

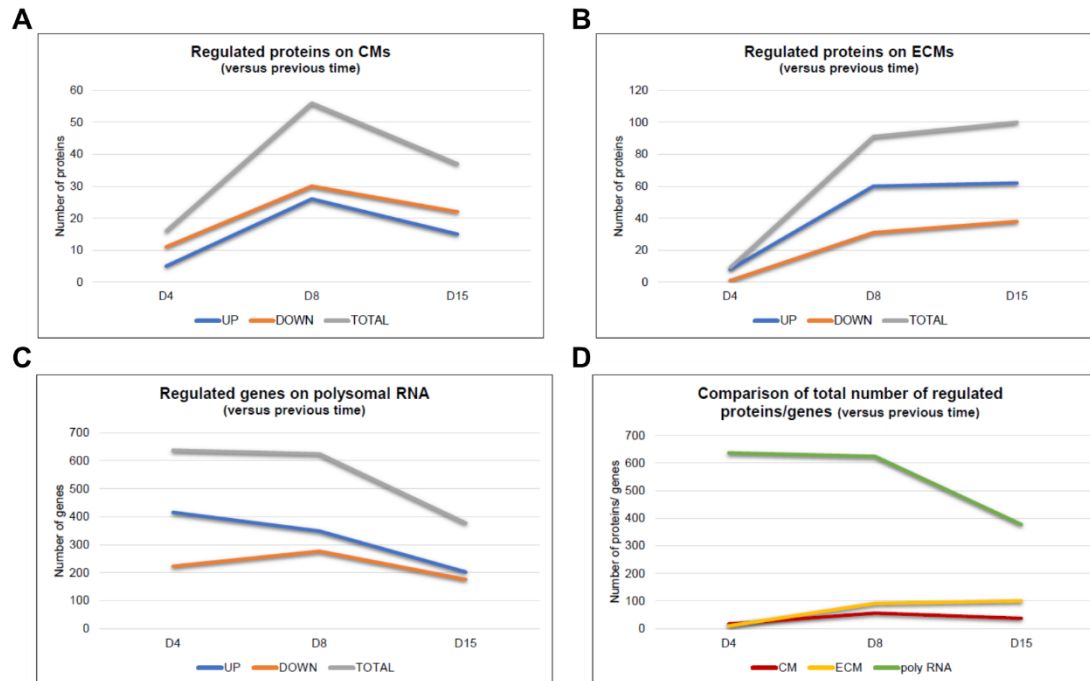

**Supplementary figure 4:** Number of proteins/genes differentially expressed (DE) during cardiac differentiation comparing each differentiation time-point with the preceding one. Indication of the number of regulated proteins at CMs (A) and at ECM (B), the number of regulated genes (C) and the comparison of total number of proteins/genes differentially expressed (DE) at CM, ECM and polysomal mRNA (D). Blue lines: upregulated proteins/ genes; Orange lines: downregulated proteins/ genes; Gray lines: total regulated proteins/ genes.

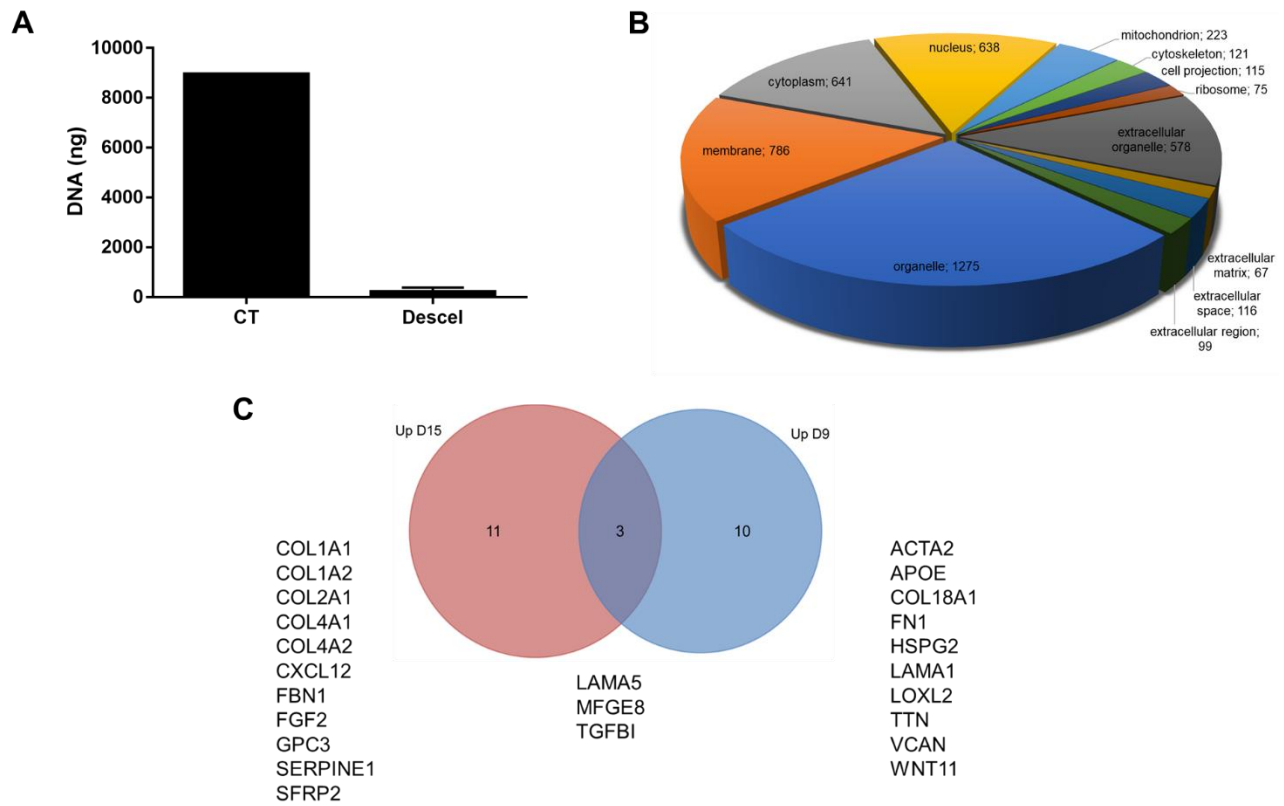

**Supplementary figure 5:** Analysis of decellularized EBs over cardiac differentiation. A) Quantification of DNA from decellularized and non decellularized EBs. B) GO annotation for cellular components at Perseus. C) Comparison of proteins related to the GO term “cardiovascular system development” identified in GO analysis of proteins upregulated at ECMd9 (up ECMd9) and ECMd15 (up ECMd15).

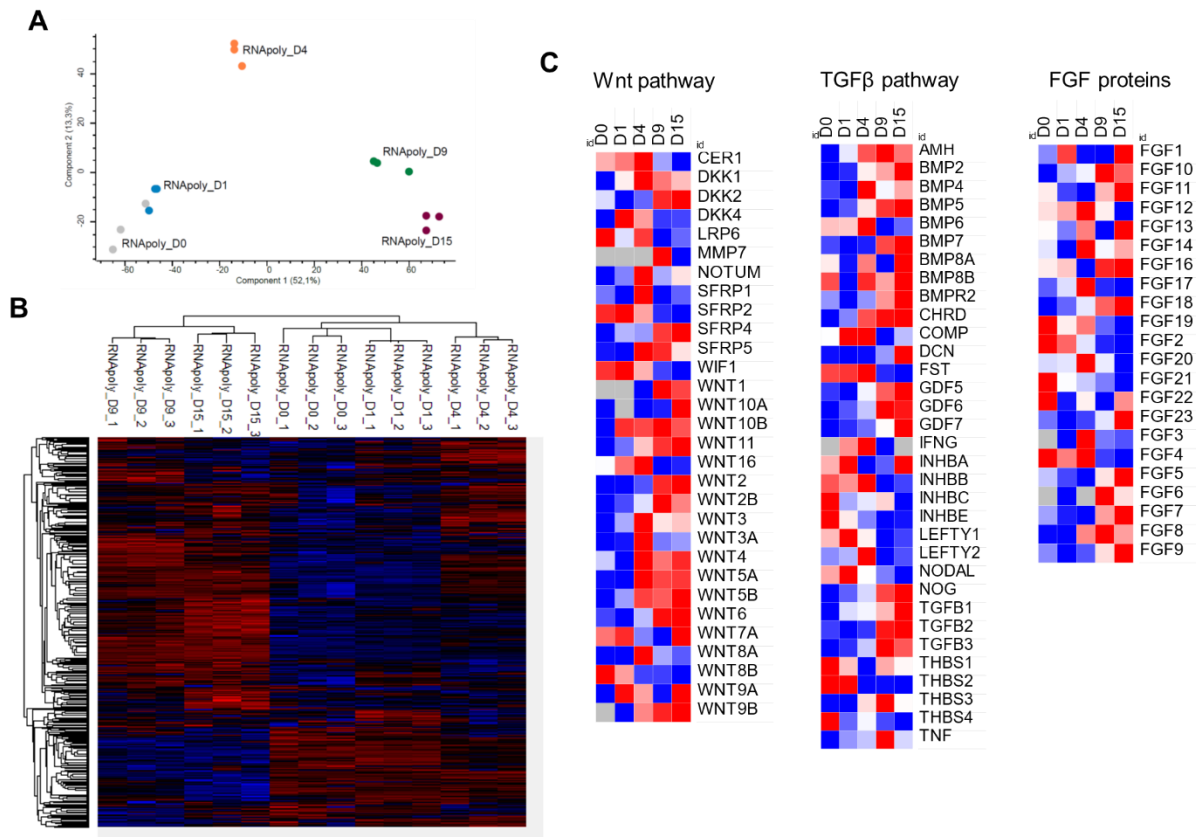

**Supplementary figure 6:** Analysis of polysomal mRNA data obtained during cardiomyogenic differentiation of hESC. A) Principal component analysis of data from polysomal mRNA sequencing obtained at days 0, 1, 4, 9 and 15 of cardiac differentiation. B) Hierarchical clustering of data from polysomal mRNA sequencing obtained at days 0, 1, 4, 9 and 15 of cardiac differentiation (high z-scores and low z-scores are represented in red and blue, respectively). C) Heatmap visualization of RPKM values of some genes related to Wnt (left), TGF $\beta$  (middle) and FGF (right) pathways (high log<sub>2</sub> values and low log<sub>2</sub> values are represented in red and blue, respectively).

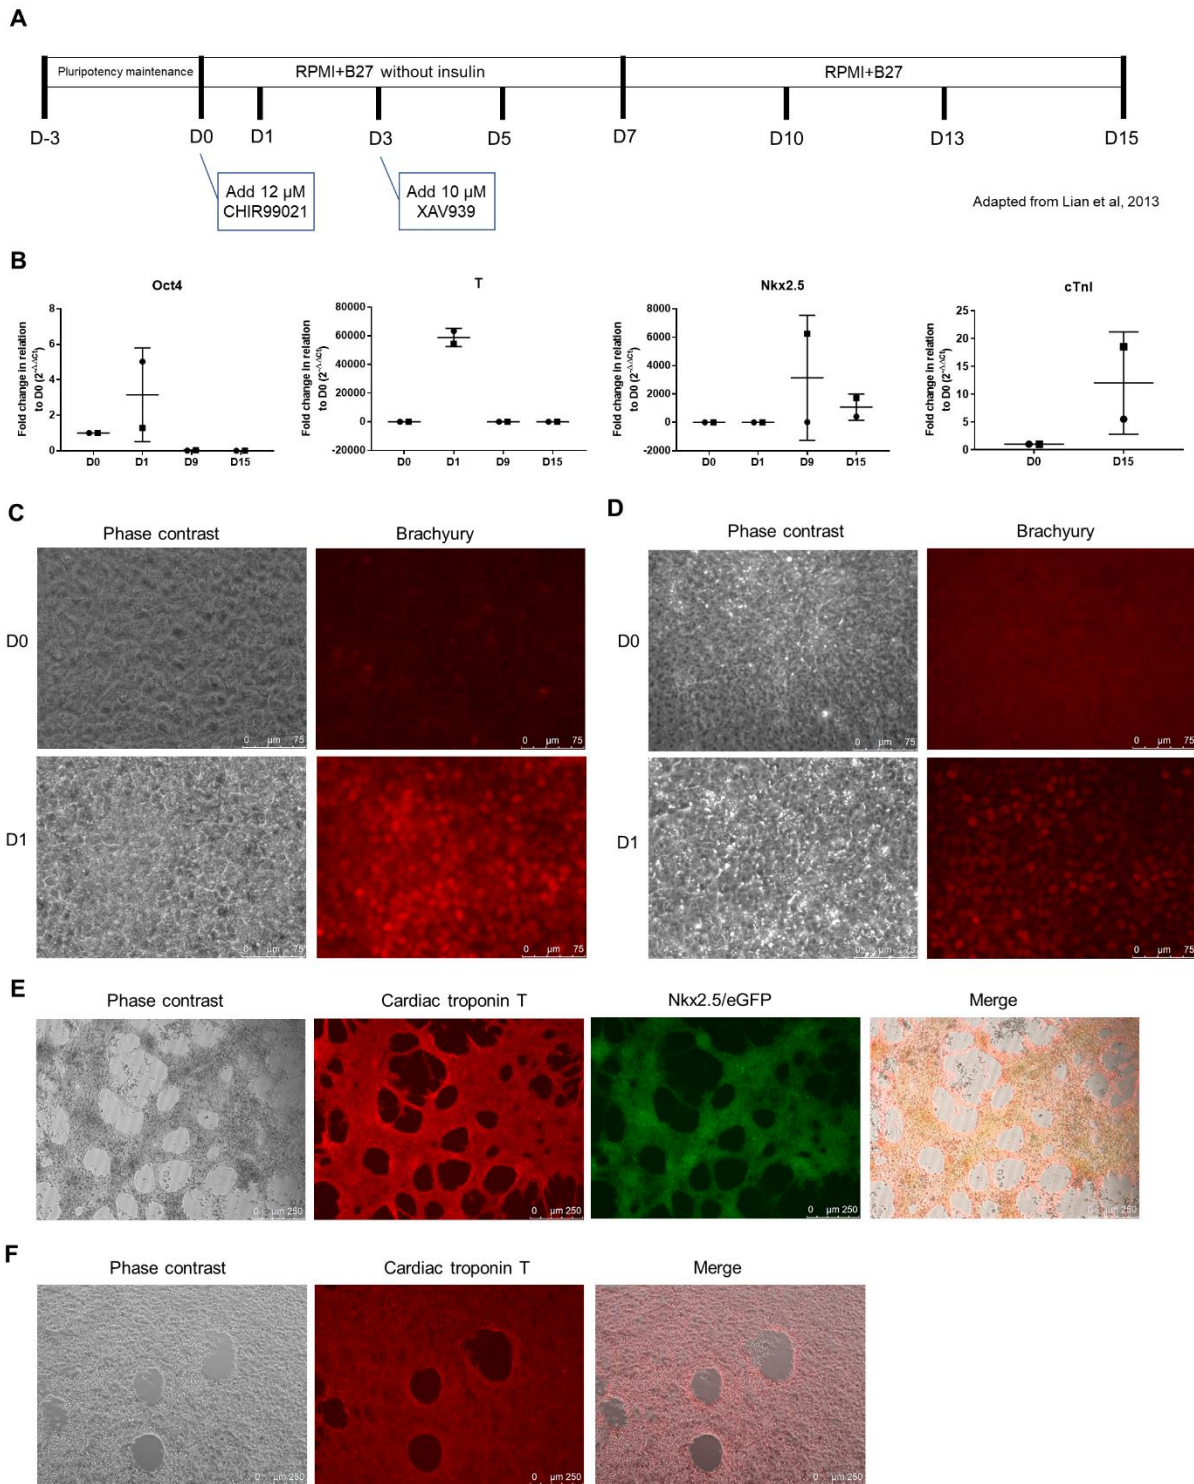

**Supplementary figure 7:** Monolayer cardiac differentiation of HES3 NKX2-5<sup>eGFP/w</sup> and H1 hESC lineages. A) Scheme of monolayer cardiac differentiation protocol. B) Relative expression ( $2^{-\Delta\Delta C_t}$  method) of OCT4, Brachyury (T), Nkx2.5 and cTnI genes in cells lineages (circle represents the HES3 and the square the H1 lineage). Representative images of immunostaining for Brachyury at D0 and D1 in H1 (C) and HES3 (D) cells. Scale bar: 75  $\mu\text{m}$ . Representative images of immunostaining for cTnT in monolayer of HES3 (E) (also possible verify eGFP expression) and H1 (F) cells. Scale bars: 250  $\mu\text{m}$ .

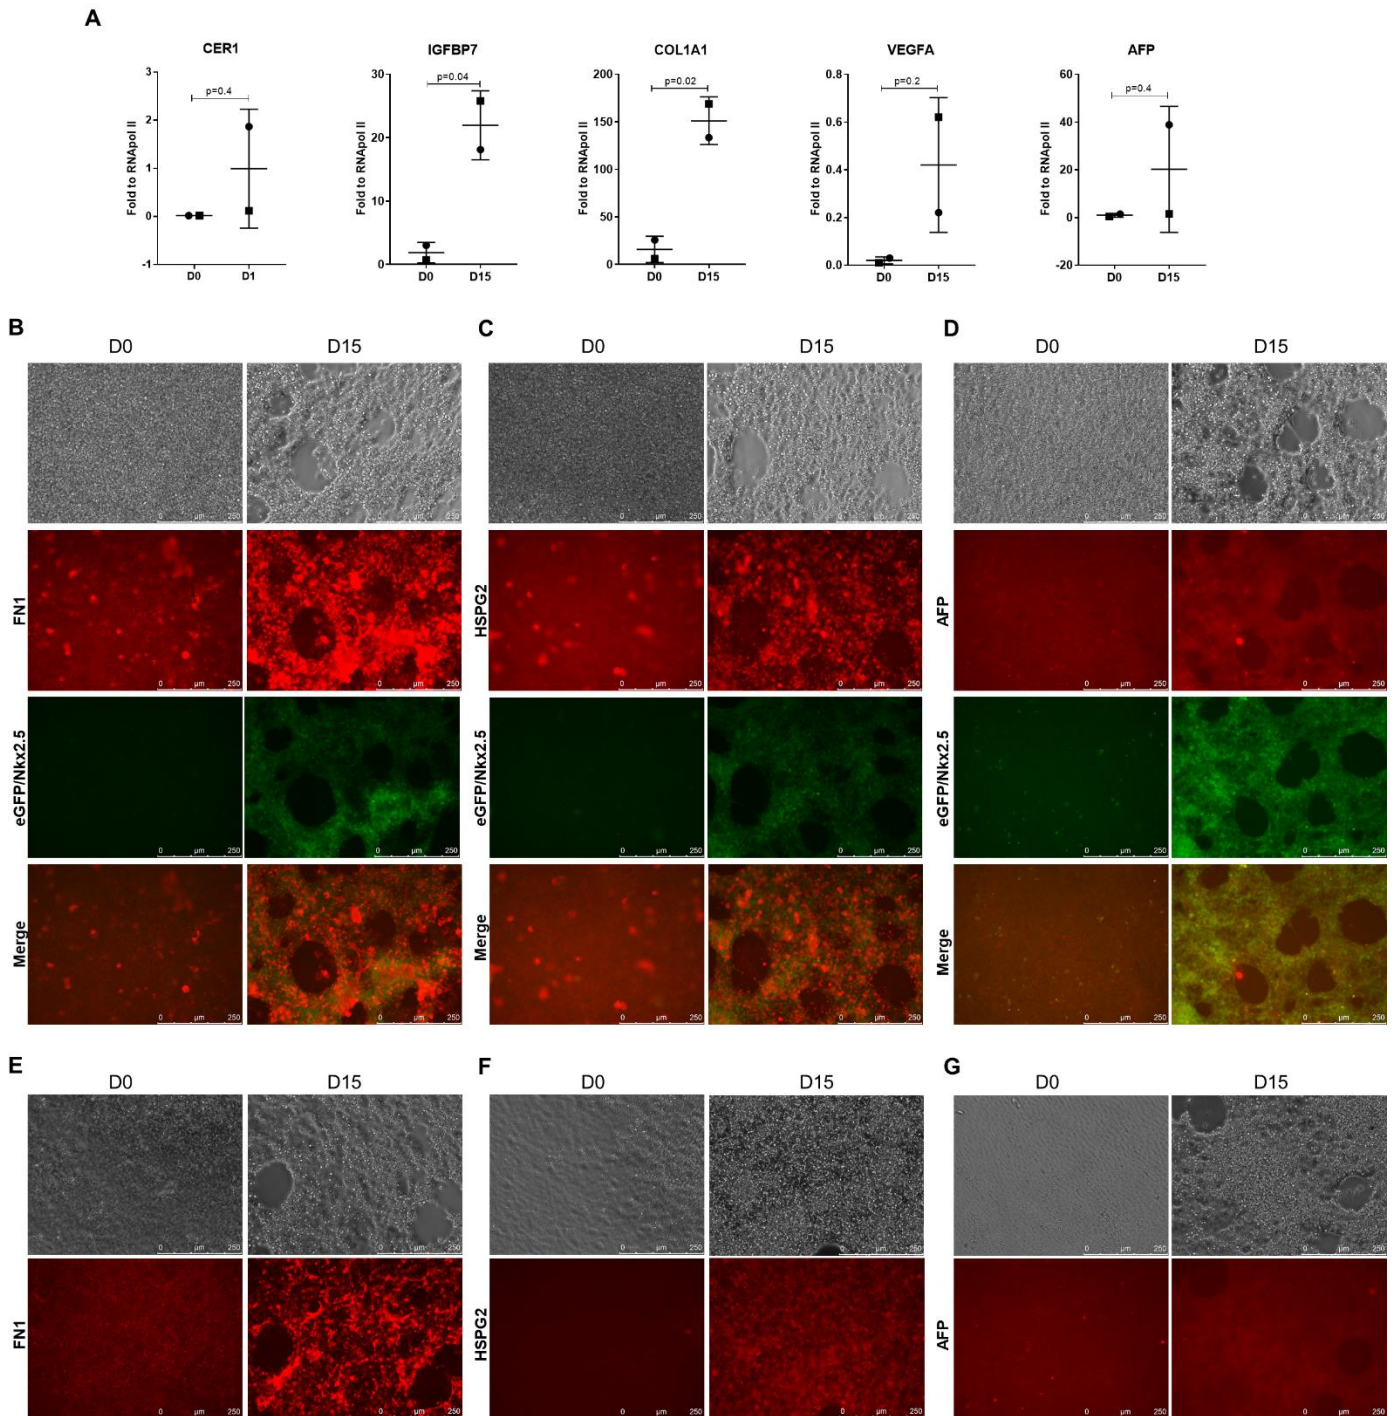

**Supplementary Figure 8:** A) Results of gene expression for CER1, IGFBP7, COL1A1, VEGFA and AFP represented by fold to RNApol II (circle represents the HES3 and the square the H1 lineage). Unpaired T-test statistical analysis. Representative images of FN1 (B), HSPG2 (C) and AFP (D) staining in HES3 NKX2-5<sup>eGFP/w</sup> cells at D0 and D15 of monolayer cardiac differentiation. It is also possible to verify eGFP/Nkx2.5 expression. Representative images of FN1 (E), HSPG2 (F) and AFP (G) staining in H1 cells at D0 and D15 of monolayer cardiac differentiation. Scale bars: 250  $\mu$ m.



Robert et al, 2019

Wolling et al, 2018

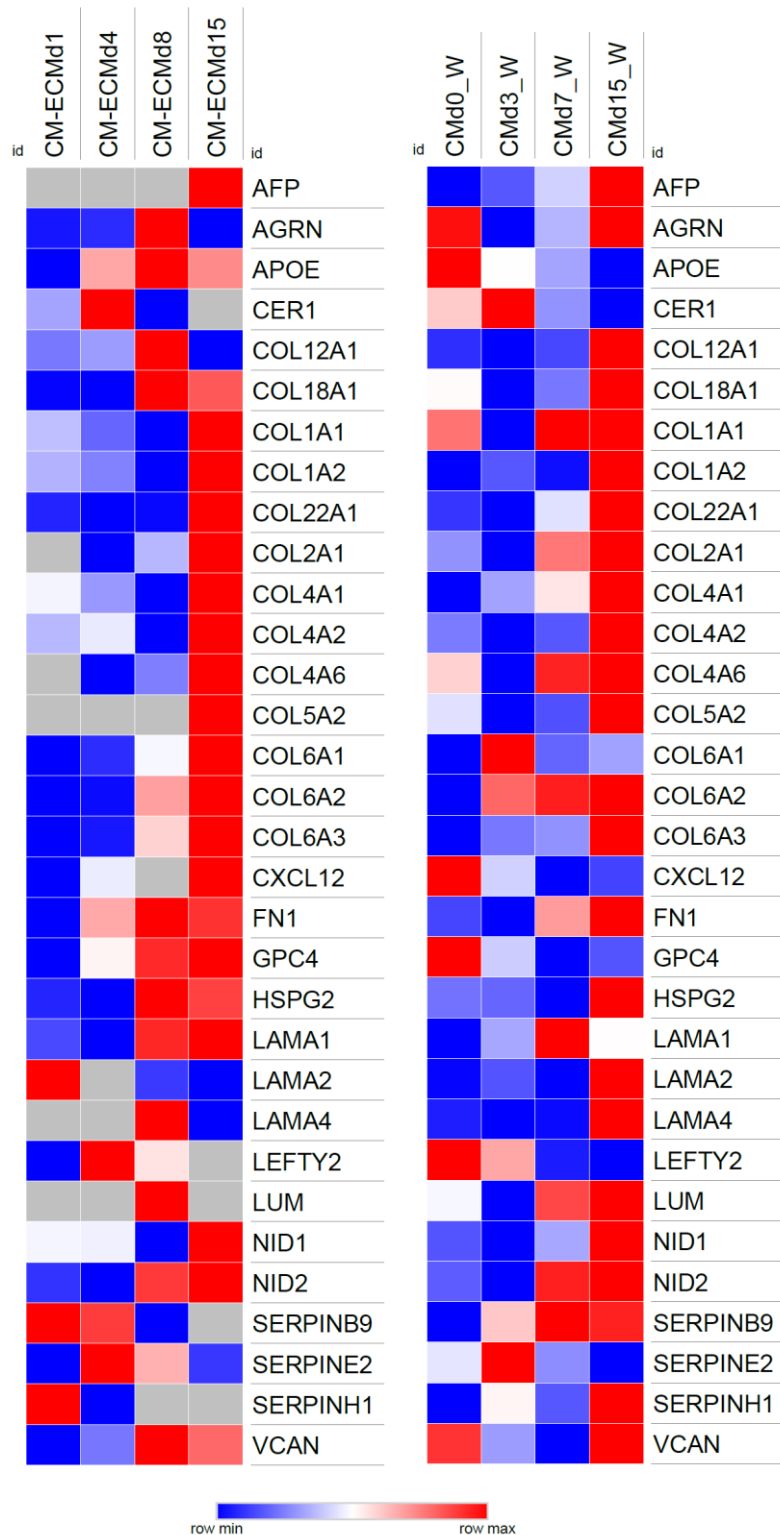

**Supplementary figure 9:** Heatmap comparing LFQ intensity data for some extracellular proteins from our work (left) with previously work from Wolling et al., 2018 (right).
