# Supplementary material for: Secretome Analysis Performed During in vitro Cardiac Differentiation: Discovering the Cardiac Microenvironment
Source: Front Cell Dev Biol. 2020 Feb 7;8:49. doi: 10.3389/fcell.2020.00049 (PMC7025591; doi:10.3389/fcell.2020.00049)
Supplement: Supplementary file 1 [file Table_1.XLSX]

## Sheet: Planilha1
CMd1_1	CMd1_2	CMd1_3	CMd4_1	CMd4_2	CMd4_3	CMd8_1	CMd8_2	CMd8_3	CMd15_1	CMd15_2	CMd15_3	Only identified by site	Reverse	Potential contaminant	nCM	Peptides	Razor + unique peptides	Unique peptides	Sequence coverage [%]	Unique + razor sequence coverage [%]	Unique sequence coverage [%]	Mol. weight [kDa]	Q-value	Score	Intensity	MS/MS count	Protein IDs	Majority protein IDs	Protein names	Gene names
#!{Type}E	E	E	E	E	E	E	E	E	E	E	E	C	C	C	C	N	N	N	N	N	N	N	N	N	N	N	T	T	T	T
0	0	0	0	0	0	0	0	3444400	0	0	0				0	16	1	1	45	3,8	3,8	46,708	0	8,0253	28671000	1	A0A024R6I7;A0A0G2JRN3;G3V2B9;G3V544;G3V5R8;G3V387;A0A0B4J278	A0A024R6I7;A0A0G2JRN3		SERPINA1
0	0	0	0	0	0	0	21483000	0	0	0	0				0	1	1	1	0,3	0,3	0,3	426,09	0	7,7078	218770000	19	A0A087WV90;E9PDN5;A0A087WTU7;A0A075B6G3;P11532	A0A087WV90;E9PDN5;A0A087WTU7;A0A075B6G3;P11532	Dystrophin	DMD
0	0	0	0	0	0	0	0	17994000	0	0	0				0	1	1	1	12,5	12,5	12,5	11,434	0,0079365	6,4133	90654000	1	A0A087X0Q4;A2NJV5;A0A0A0MRZ7;A0A075B6S6;A0A075B6S2;A0A075B6P5;A0A087WW87;P06310;P01615;P01614	A0A087X0Q4;A2NJV5;A0A0A0MRZ7;A0A075B6S6;A0A075B6S2;A0A075B6P5;A0A087WW87;P06310;P01615;P01614	Ig kappa chain V-II region RPMI 6410;Ig kappa chain V-II region FR;Ig kappa chain V-II region Cum	IGKV2-40;IGKV A18;IGKV2D-26;IGKV2D-30;IGKV2D-29;IGKV2D-28
0	0	0	0	34364000	0	0	0	0	0	0	0				0	1	1	1	5,6	5,6	5,6	39,147	0,0080863	6,4717	71704000	2	A0A087WTG3	A0A087WTG3		CUL3
1599700	0	0	0	0	0	0	0	0	0	0	0				0	4	4	4	8,2	8,2	8,2	58,535	0	24,154	20431000	8	A0A087WTT1;P11940;E7EQV3;E7ERJ7;Q9H361;E5RH24;E5RJB9;H0YAR2;Q4VXU2;E5RGC4;E5RFD8;E5RHG7;E5RGH3;H0YAP2;H0YB86;H0YBN4;Q5JQF8;Q96DU9	A0A087WTT1;P11940;E7EQV3;E7ERJ7;Q9H361;E5RH24;E5RJB9;H0YAR2;Q4VXU2	Polyadenylate-binding protein;Polyadenylate-binding protein 1;Polyadenylate-binding protein 3;Polyadenylate-binding protein 1-like	PABPC1;PABPC3;PABPC1L
0	0	0	0	0	2512900	0	0	0	0	0	0	+			0	21	1	1	73	3,6	3,6	31,408	1	-2	12335000	0	A0A087WU08	A0A087WU08		HP
1286800	0	0	1017300	0	858910	0	0	0	0	0	0				0	3	3	3	10,3	10,3	10,3	29,836	0	20,971	35010000	6	A0A087WUI2;P22626	A0A087WUI2;P22626	Heterogeneous nuclear ribonucleoproteins A2/B1	HNRNPA2B1
0	0	0	27799000	0	0	0	0	0	0	0	0				0	2	2	2	1	1	1	274,83	0	11,778	218780000	4	A0A087WUZ3;Q01082;F8W6C1	A0A087WUZ3;Q01082;F8W6C1	Spectrin beta chain, non-erythrocytic 1	SPTBN1
22938000	9346500	6455600	2150700	3613500	2100100	1649100	882900	1179600	0	1257800	860860				0	14	14	14	11,9	11,9	11,9	192,06	0	129,63	129410000	33	A0A087WVQ6;Q00610;J3KS13;A0A087WX41;P53675;J3KRF5;K7EJJ5;J3KSQ2;F5H5N6	A0A087WVQ6;Q00610	Clathrin heavy chain;Clathrin heavy chain 1	CLTC
0	2541500	0	0	0	0	0	0	0	0	0	0			+	0	1	1	1	14,7	14,7	14,7	8,014	0	7,1123	23513000	4	H0YL80;D6R904;K7EP68;H0YKX5;H0YKP3;K7ERG3;K7ENT6;H0YNC7;A0A087WWU8;Q5HYB6;F5H7S3;H7BYY1;H0YK48;H0YL52;B7Z596;Q5TCU3;CON__Q3SX28;J3KN67;Q5TCU8;Q6ZN40;P67936;P09493;P07951;P06753	H0YL80;D6R904;K7EP68;H0YKX5;H0YKP3;K7ERG3;K7ENT6;H0YNC7;A0A087WWU8;Q5HYB6;F5H7S3;H7BYY1;H0YK48;H0YL52;B7Z596;Q5TCU3;CON__Q3SX28;J3KN67;Q5TCU8;Q6ZN40;P67936;P09493;P07951;P06753	Tropomyosin alpha-4 chain;Tropomyosin alpha-1 chain;Tropomyosin beta chain;Tropomyosin alpha-3 chain	TPM1;TPM3;TPM4;DKFZp686J1372;TPM2
5595300	50095000	5989700	4988300	6584000	5315700	0	0	0	0	0	0				0	6	6	6	16,7	16,7	16,7	56,967	0	46,327	87911000	16	A0A087WYS1;E7EUC7;Q16851;C9JVG3;C9JQU9;C9JNZ1;C9JWG0;C9JTZ5;C9JUW1	A0A087WYS1;E7EUC7;Q16851;C9JVG3;C9JQU9;C9JNZ1	UTP--glucose-1-phosphate uridylyltransferase	UGP2
3194200	6329100	0	0	0	3780800	0	0	0	0	0	0				0	2	2	2	11,2	11,2	11,2	25,041	0	12,976	50499000	3	A0A087WYS6;O14818;Q8TAA3;H0Y586	A0A087WYS6;O14818;Q8TAA3;H0Y586	Proteasome subunit alpha type-7;Proteasome subunit alpha type-7-like	PSMA8;PSMA7
0	0	0	0	0	0	574250	0	0	0	0	0				0	2	2	2	2	2	2	113,79	0	10,77	1353600	1	A0A087X0H9;Q5T8P6;E2PSN0	A0A087X0H9;Q5T8P6;E2PSN0	RNA-binding protein 26	RBM26
0	7045700	4701100	57504000	27080000	18819000	81955000	75642000	48752000	35673000	44110000	32755000				0	10	10	10	13,4	13,4	13,4	108,34	0	96,348	383530000	59	A0A087X0S5;P12109	A0A087X0S5;P12109	Collagen alpha-1(VI) chain	COL6A1
0	0	0	0	0	0	0	0	0	0	0	0			+	0	6	6	3	14,9	14,9	8,9	53,116	0	53,878	509520000	11	A0A087X106;CON__O43790;CON__Q14533;O43790;Q14533;CON__Q6NT21;P78385;CON__P78385;U3KPR1;A6NCN2	A0A087X106;CON__O43790;CON__Q14533;O43790;Q14533;CON__Q6NT21;P78385;CON__P78385	Keratin, type II cuticular Hb6;Keratin, type II cuticular Hb1;Keratin, type II cuticular Hb3	KRT81;KRT86;KRT83
113830000	92340000	55972000	79028000	73198000	277040000	90472000	112260000	103070000	102770000	111150000	175380000				77410000	10	10	5	39,3	39,3	22,1	43,911	0	99,742	1864300000	139	A0A0A0MS08;P01857;A0A0A0MS07	A0A0A0MS08;P01857;A0A0A0MS07	Ig gamma-1 chain C region	IGHG1
0	0	0	0	0	0	0	0	1826700032	0	0	0				0	1	1	1	1,3	1,3	1,3	111,83	0,0028902	6,8423	14424000000	25	A0A0A0MSU2;A0A1C7CYX1;Q6PJG2	A0A0A0MSU2;A0A1C7CYX1;Q6PJG2	ELM2 and SANT domain-containing protein 1	ELMSAN1
0	0	0	0	0	5353100	0	0	0	0	0	0				0	2	2	2	10,4	10,4	10,4	30,37	0	13,672	9374000	2	A0A0J9YXP8;A0A0J9YX90;A0A0J9YYH3;K7EQ48;A0A0A0MTS2;P06744	A0A0J9YXP8;A0A0J9YX90;A0A0J9YYH3;K7EQ48;A0A0A0MTS2;P06744	Glucose-6-phosphate isomerase	GPI
4762900	12642000	8909100	0	6957700	15836000	16691000	17308000	16868000	17373000	12305000	14469000				14996000	3	3	2	19,5	19,5	12,6	23,15	0	40,417	146740000	48	A0A0B4J231;B9A064;P0CG04	A0A0B4J231;B9A064;P0CG04	Immunoglobulin lambda-like polypeptide 5;Ig lambda-1 chain C regions	IGLL5;IGLC1
10647000	6158700	7408000	3131400	3025500	0	0	0	0	1420600	0	0				0	3	3	3	13,2	13,2	13,2	31,124	0	92,021	138680000	20	A0A0C4DFV9;Q01105;A0A087X027;P0DME0	A0A0C4DFV9;Q01105;A0A087X027;P0DME0	Protein SET;Protein SETSIP	SET;SETSIP
4962200	4814800	11244000	3237300	5718400	7350100	2222100	3042700	4105600	1696600	2542700	2238000				0	5	5	5	26,2	26,2	26,2	29,404	0	33,775	96314000	17	C9J9K3;A0A0C4DG17;P08865;F8WD59	C9J9K3;A0A0C4DG17;P08865;F8WD59	40S ribosomal protein SA	RPSA
0	0	0	0	32472000	0	0	0	0	0	0	0				0	1	1	1	32,4	32,4	32,4	4,0347	0,0054795	6,5697	183560000	2	G3V521;G3V4R2;G3V332;G3V427;A0A0C4DGJ8;Q6IPR1	G3V521;G3V4R2;G3V332;G3V427;A0A0C4DGJ8;Q6IPR1	LYR motif-containing protein 5	LYRM5
0	0	0	0	0	0	1234900	0	0	0	0	0				0	1	1	1	6,1	6,1	6,1	25,428	0,0028011	6,6783	12144000	13	I3L1J1;B4DYU0;A0A0C4DGN2;I3L145;P04278	I3L1J1;B4DYU0;A0A0C4DGN2;I3L145;P04278	Sex hormone-binding globulin	SHBG
0	0	0	0	0	0	0	3491300	0	0	0	0				0	1	1	1	13,8	13,8	13,8	12,515	0	8,081	29315000	7	A0A0C4DH25;P01619	A0A0C4DH25;P01619	Ig kappa chain V-III region B6	IGKV3D-20
0	0	0	0	0	5787100	5388000	6218400	0	0	0	0				0	2	2	2	4,6	4,6	4,6	65,769	0	13,622	35676000	6	A0A0G2JH38;E7ETN3;B4E1Z4;P00751;H7C5H1	A0A0G2JH38;E7ETN3;B4E1Z4;P00751;H7C5H1	Complement factor B;Complement factor B Ba fragment;Complement factor B Bb fragment	CFB
1631800	16770000	2895500	0	1870900	1502200	966700	975480	0	0	0	0				0	4	4	4	14,3	14,3	14,3	38,125	0	43,144	41657000	8	A0A0G2JJZ9;Q13838;H0Y400;A0A140T9X3;Q5STU3;O00148;A0A140T9X9;A0A140T996;F6UJC5;A0A140TA18;F6WLT2;A0A140T9K2;A0A140T9N3;A0A140T9L4;A0A140T973;A0A140T9K1;H0YCC6;F6QYI9;A0A0G2JJL7;F6R6M7;F6S4E6;A0A0A0MT12;F6TRA5	A0A0G2JJZ9;Q13838;H0Y400;A0A140T9X3;Q5STU3;O00148;A0A140T9X9;A0A140T996;F6UJC5;A0A140TA18;F6WLT2	Spliceosome RNA helicase DDX39B;ATP-dependent RNA helicase DDX39A	DDX39B;DDX39A
3571900	4489400	4467400	9064400	8553000	5642800	11234000	11191000	5157000	14218000	12752000	10723000				9937100	5	4	0	4,9	4,2	0	187,79	0	159,84	108240000	76	A0A140TA49;A0A140TA44;A0A140TA32;A0A0G2JPR0;P0C0L4	A0A140TA49;A0A140TA44;A0A140TA32;A0A0G2JPR0;P0C0L4	Complement C4-A;Complement C4 beta chain;Complement C4-A alpha chain;C4a anaphylatoxin;C4b-A;C4d-A;Complement C4 gamma chain	C4A
0	0	0	0	0	0	0	0	581880000	0	0	0			+	0	1	1	1	14,1	14,1	14,1	15,421	0	36,212	7745200000	26	H0Y8D1;A6XMV8;CON__P07477;A0A0J9YYC8;E7EQ64;A6XMV9;Q8NHM4;P07478;P07477	H0Y8D1;A6XMV8;CON__P07477;A0A0J9YYC8;E7EQ64;A6XMV9;Q8NHM4;P07478;P07477	Putative trypsin-6;Trypsin-2;Trypsin-1;Alpha-trypsin chain 1;Alpha-trypsin chain 2	PRSS1;PRSS3P2;PRSS2
6528500	3772300	15970000	2542100	5031200	1751300	1066700	774740	1425500	777280	862640	0				0	8	8	8	5	5	5	273,2	0	54,745	94344000	28	A0A0U1RQF0;P49327	A0A0U1RQF0;P49327	Fatty acid synthase;[Acyl-carrier-protein] S-acetyltransferase;[Acyl-carrier-protein] S-malonyltransferase;3-oxoacyl-[acyl-carrier-protein] synthase;3-oxoacyl-[acyl-carrier-protein] reductase;3-hydroxyacyl-[acyl-carrier-protein] dehydratase;Enoyl-[acyl-carrier-protein] reductase;Oleoyl-[acyl-carrier-protein] hydrolase	FASN
5259600	41920000	46294000	42600000	5552900	2700500	5259200	3359800	2893100	4520600	4653700	4086100				0	3	3	3	20,7	20,7	20,7	18,481	0	24,299	184080000	29	A0A0U1RR32;A0A0U1RRH7;Q99878;Q96KK5;Q9BTM1;Q16777;Q93077;Q7L7L0;Q6FI13;P20671;P0C0S8;P04908;H0YFX9;C9J0D1;Q71UI9;P0C0S5;Q96QV6;P16104;C9J386;Q8IUE6	A0A0U1RR32;A0A0U1RRH7;Q99878;Q96KK5;Q9BTM1;Q16777;Q93077;Q7L7L0;Q6FI13;P20671;P0C0S8;P04908;H0YFX9;C9J0D1;Q71UI9;P0C0S5;Q96QV6;P16104	Histone H2A type 1-J;Histone H2A type 1-H;Histone H2A.J;Histone H2A type 2-C;Histone H2A type 1-C;Histone H2A type 3;Histone H2A type 2-A;Histone H2A type 1-D;Histone H2A type 1;Histone H2A type 1-B/E;Histone H2A;Histone H2A.V;Histone H2A.Z;Histone H2A type 1-A;Histone H2AX	HIST1H2AJ;HIST1H2AH;H2AFJ;HIST2H2AC;HIST1H2AC;HIST3H2A;HIST2H2AA3;HIST1H2AD;HIST1H2AG;HIST1H2AB;H2AFV;H2AFZ;HIST1H2AA;H2AFX
0	0	0	105050	0	0	0	0	0	0	0	0				0	1	1	1	6,7	6,7	6,7	16,425	0,0028736	6,7833	3050900	2	A0A1B0GTT5;B0YJC4;P08670	A0A1B0GTT5;B0YJC4;P08670	Vimentin	VIM
1471000	0	0	0	0	0	0	0	0	0	0	0				0	3	3	3	7,9	7,9	7,9	43,688	0	19,041	26510000	4	A0A1B0GW44;A0A1B0GVP3;A0A1B0GV23;A0A1B0GVD5;A0A1B0GWE8;P07339;F8WD96;C9JH19;H7C469;A0A1B0GU92;A0A1B0GU03;H7C1V0;F8W787	A0A1B0GW44;A0A1B0GVP3;A0A1B0GV23;A0A1B0GVD5;A0A1B0GWE8;P07339;F8WD96;C9JH19;H7C469;A0A1B0GU92;A0A1B0GU03	Cathepsin D;Cathepsin D light chain;Cathepsin D heavy chain	CTSD
0	0	0	0	0	0	0	0	0	0	0	0				0	5	5	5	9,8	9,8	9,8	81,794	0	30,863	18283000	5	A0A1X7SBS1;A0A1W2PPS1;Q00839;A0A1W2PP35;A0A1W2PRZ7;A0A1W2PQ74;A0A1W2PQL0;A0A1W2PP34;A0A1W2PPL4;A0A1W2PPH7;Q5RI18;A0A1W2PP22;A0A1W2PQD4	A0A1X7SBS1;A0A1W2PPS1;Q00839;A0A1W2PP35;A0A1W2PRZ7;A0A1W2PQ74;A0A1W2PQL0;A0A1W2PP34;A0A1W2PPL4;A0A1W2PPH7;Q5RI18	Heterogeneous nuclear ribonucleoprotein U	HNRNPU
0	0	0	11638000	0	0	0	0	0	12624000	7813200	4928500				5275800	3	3	3	9,8	9,8	9,8	42,848	0	19,759	70023000	6	A0A286YEY1;P01876;A0A0G2JMB2;A0A286YEY5;P01877	A0A286YEY1;P01876;A0A0G2JMB2	Ig alpha-1 chain C region	IGHA1
5840700	6737800	5528500	7688500	8317200	47188000	14078000	15664000	11849000	11619000	10071000	22912000				8431100	6	2	2	19,2	8,4	8,4	43,805	0	16,808	264520000	60	A0A286YEY4;P01859	A0A286YEY4;P01859	Ig gamma-2 chain C region	IGHG2
19738000	15939000	19851000	0	6374700	22292000	22893000	25637000	12249000	0	12899000	0				14421000	7	3	1	24,7	10,9	4,3	43,831	0	36,004	382740000	33	A0A286YFJ8;P01861	A0A286YFJ8;P01861	Ig gamma-4 chain C region	IGHG4
0	0	0	0	0	0	0	0	10717000	0	0	0				0	2	1	1	32,1	17,9	17,9	11,265	0	13,505	123140000	56	P0DOY3;P0DOY2;P0CF74;A0M8Q6	P0DOY3;P0DOY2;P0CF74;A0M8Q6	Ig lambda-6 chain C region;Ig lambda-7 chain C region	IGLC6;IGLC7
0	0	0	0	0	0	0	0	28755000	0	0	0				0	1	1	1	7,6	7,6	7,6	10,631	0	12,269	161310000	27	C9JNR5;A6XGL2;P01308;F8WCM5	C9JNR5;A6XGL2;P01308;F8WCM5	Insulin;Insulin B chain;Insulin A chain;Insulin, isoform 2	INS;INS-IGF2
0	0	0	0	0	0	0	12308000	0	0	0	0				0	1	1	1	13,7	13,7	13,7	12,815	0	13,259	55683000	9	B0YIW2;P02656	B0YIW2;P02656	Apolipoprotein C-III	APOC3
0	0	0	0	0	0	0	0	3623700	0	0	0				0	4	1	1	8,7	2,8	2,8	78,329	0	18,49	41361000	21	B1AHL2;B1AHM7;H7C1M6;B1AHM9	B1AHL2;B1AHM7;H7C1M6;B1AHM9	Fibulin-1	FBLN1
363690	0	0	0	0	0	0	0	0	0	0	0				0	1	1	1	12,7	12,7	12,7	9,1033	0,0054945	6,5826	1535500	1	C9JD14;B1AKQ8;C9JZN1;F6X3N5;F6UT28;F5H8J8;F5H100;C9JIS1;C9JXA5;F5H0S8;E7EP32;E9PCP0;Q9HAV0;P62879;P62873;P16520	C9JD14;B1AKQ8;C9JZN1;F6X3N5;F6UT28;F5H8J8;F5H100;C9JIS1;C9JXA5;F5H0S8;E7EP32;E9PCP0;Q9HAV0;P62879;P62873;P16520	Guanine nucleotide-binding protein subunit beta-4;Guanine nucleotide-binding protein G(I)/G(S)/G(T) subunit beta-2;Guanine nucleotide-binding protein G(I)/G(S)/G(T) subunit beta-1;Guanine nucleotide-binding protein G(I)/G(S)/G(T) subunit beta-3	GNB4;GNB1;GNB2;GNB3
0	0	0	0	0	0	0	0	10948000	0	0	0				0	1	1	1	7,3	7,3	7,3	19,288	0	15,156	200320000	28	B1AN99;P35030	B1AN99;P35030	Trypsin-3	PRSS3
0	0	753930	383560	0	0	0	0	0	0	0	0				0	2	2	2	34,8	34,8	34,8	7,2803	0	14,016	24418000	2	G3V4M8;G3V5X6;G3V3K6;G3V251;B4DSU6;G3V555;G3V575;G3V576;G3V4W0;B4DY08;B2R5W2;G3V4C1;G3V2Q1;P07910;G3V2H6;A0A0G2JPF8;A0A0G2JNQ3;P0DMR1;O60812;B7ZW38;B2RXH8	G3V4M8;G3V5X6;G3V3K6;G3V251;B4DSU6;G3V555;G3V575;G3V576;G3V4W0;B4DY08;B2R5W2;G3V4C1;G3V2Q1;P07910;G3V2H6;A0A0G2JPF8;A0A0G2JNQ3;P0DMR1;O60812;B7ZW38;B2RXH8	Heterogeneous nuclear ribonucleoproteins C1/C2;Heterogeneous nuclear ribonucleoprotein C-like 4;Heterogeneous nuclear ribonucleoprotein C-like 1;Heterogeneous nuclear ribonucleoprotein C-like 3;Heterogeneous nuclear ribonucleoprotein C-like 2	HNRNPC;HNRNPCL4;HNRNPCL1;HNRNPCL3;HNRNPCL2
0	0	0	0	0	1034300032	1180000000	1239699968	1811100032	2053100032	1305400064	0				0	1	1	1	2,2	2,2	2,2	57,183	0,0080214	6,4613	11509000000	12	B3KTU7;Q9BSJ2	B3KTU7;Q9BSJ2	Gamma-tubulin complex component 2	TUBGCP2
7307800	0	0	0	0	0	0	0	0	0	0	0				0	3	3	3	25	25	25	10,334	0	27,881	189570000	22	K7EMV3;B4DEB1;K7EK07;K7ES00;Q71DI3;Q16695;P84243;P68431;K7EP01;Q5TEC6;Q6NXT2	K7EMV3;B4DEB1;K7EK07;K7ES00;Q71DI3;Q16695;P84243;P68431;K7EP01;Q5TEC6;Q6NXT2	Histone H3;Histone H3.2;Histone H3.1t;Histone H3.3;Histone H3.1;Histone H3.3C	H3F3B;H3F3A;HIST2H3A;HIST3H3;HIST1H3A;HIST2H3PS2;H3F3C
2240400	1530900	0	1541800	1637100	3980400	0	0	0	0	1332000	0				0	5	5	5	15,1	15,1	15,1	49,897	0	32,906	32296000	6	B4DNK4;P14618;H3BTN5;H3BQ34;H3BR70	B4DNK4;P14618;H3BTN5;H3BQ34;H3BR70	Pyruvate kinase;Pyruvate kinase PKM	PKM
0	0	0	0	4036700	0	0	0	0	0	0	0				0	1	1	1	37,2	37,2	37,2	4,8535	0	8,081	18186000	6	J3QSA3;F5GZ39;M0R1V7;J3QS39;Q49A90;J3QTR3;F5H6Q2;F5GYU3;F5H2Z3;F5H265;B4DV12;F5H388;F5H747;F5GXK7;J3QKN0;Q5PY61;Q96C32;P62987;P62979;P0CG47;P0CG48	J3QSA3;F5GZ39;M0R1V7;J3QS39;Q49A90;J3QTR3;F5H6Q2;F5GYU3;F5H2Z3;F5H265;B4DV12;F5H388;F5H747;F5GXK7;J3QKN0;Q5PY61;Q96C32;P62987;P62979;P0CG47;P0CG48	Ubiquitin-60S ribosomal protein L40;Ubiquitin;60S ribosomal protein L40;Ubiquitin-40S ribosomal protein S27a;Ubiquitin;40S ribosomal protein S27a;Polyubiquitin-B;Ubiquitin;Polyubiquitin-C;Ubiquitin	UBB;UBC;UBA52;RPS27A
6949900	31872000	26083000	14249000	28194000	3751100	3427800	3031000	11114000	3341200	3809700	5086400				0	4	4	4	15,6	15,6	15,6	38,91	0	68,397	186440000	35	B4DY09;Q12905;X6R6Z1;A0A0A0MRL0	B4DY09;Q12905;X6R6Z1	Interleukin enhancer-binding factor 2	ILF2
466270	0	0	0	0	0	0	0	0	0	0	0				0	2	2	2	18,2	18,2	18,2	21,312	0	13,841	5214200	3	B5MCP9;P62081	B5MCP9;P62081	40S ribosomal protein S7	RPS7
15643000	41824000	33280000	5638000	3528600	6165100	2775100	3317100	3516500	1329600	0	1333000				0	5	5	5	33,3	33,3	33,3	22,436	0	89,257	193470000	22	F5H018;B5MDF5;J3KQE5;P62826;B4DV51;H0YFC6	F5H018;B5MDF5;J3KQE5;P62826;B4DV51	GTP-binding nuclear protein Ran	RAN
0	0	0	0	0	0	0	0	0	0	0	0				0	1	1	1	15,5	15,5	15,5	11,677	0	8,4242	2094100	5	F8VZU9;G3V1Y7;F8VPF3;F8W1R7;J3KND3;G8JLA2;G3V1V0;F8W180;B7Z6Z4;P60660	F8VZU9;G3V1Y7;F8VPF3;F8W1R7;J3KND3;G8JLA2;G3V1V0;F8W180;B7Z6Z4;P60660	Myosin light polypeptide 6	MYL6
34932000	29673000	23084000	44779000	64104000	92729000	77317000	79040000	64708000	84758000	74245000	86314000				80407000	9	7	7	10,9	9	9	103,88	0	108,79	945710000	161	B7ZKJ8;Q14624;H7C0L5	B7ZKJ8;Q14624;H7C0L5	Inter-alpha-trypsin inhibitor heavy chain H4;70 kDa inter-alpha-trypsin inhibitor heavy chain H4;35 kDa inter-alpha-trypsin inhibitor heavy chain H4	ITIH4
0	0	0	0	0	41858000	0	0	0	0	0	0	+			0	1	1	1	0,6	0,6	0,6	187,81	1	-2	49897000	1	B9ZVN9;O95602	B9ZVN9;O95602	DNA-directed RNA polymerase;DNA-directed RNA polymerase I subunit RPA1	POLR1A
0	0	0	0	0	0	0	0	1146100	0	0	0				0	1	1	1	19	19	19	7,0861	0	7,5044	12363000	1	C9J0E4;P01040	C9J0E4;P01040	Cystatin-A;Cystatin-A, N-terminally processed	CSTA
0	0	0	0	0	0	0	0	1047900	0	0	0				0	1	1	1	16,8	16,8	16,8	10,238	0	7,6669	9160300	11	C9JYS1;C9J196;C9JQL4;Q14118	C9JYS1;C9J196;C9JQL4;Q14118	Dystroglycan;Alpha-dystroglycan;Beta-dystroglycan	DAG1
0	0	0	1249400	0	0	0	0	0	0	0	0				0	1	1	1	2	2	2	53,867	0,0028409	6,7466	5019400	2	C9J8Q5;P51649	C9J8Q5;P51649	Succinate-semialdehyde dehydrogenase, mitochondrial	ALDH5A1
0	0	5059100	3321200	4765300	17499000	26498000	22172000	14087000	13611000	11192000	15348000				13774000	3	3	3	14,4	14,4	14,4	24,158	0	28,948	132450000	33	C9JF17;P05090;C9JX71	C9JF17;P05090	Apolipoprotein D	APOD
0	0	0	0	0	0	0	3973200	0	0	0	0				0	2	2	2	15,8	15,8	15,8	16,698	0	10,874	11218000	1	C9JUG7;F8W9N7;P47755;F8WED3;A0A0D9SET8;P52907	C9JUG7;F8W9N7;P47755;F8WED3;A0A0D9SET8;P52907	F-actin-capping protein subunit alpha-2;F-actin-capping protein subunit alpha-1	CAPZA2;CAPZA1
8345100	17821000	5941900	0	2831700	0	0	0	0	0	0	0			+	0	9	9	8	7,3	7,3	6,6	192,79	0	83,987	71036000	22	CON__P01030;CON__ENSEMBL:ENSBTAP00000007350	CON__P01030;CON__ENSEMBL:ENSBTAP00000007350
0	10199000	0	0	0	0	0	0	0	0	0	0			+	0	1	1	1	13,3	13,3	13,3	11,756	0,0029326	6,904	12571000	1	CON__ENSEMBL:ENSBTAP00000014147	CON__ENSEMBL:ENSBTAP00000014147
3036300	0	0	0	0	0	0	0	0	0	0	0			+	0	5	3	3	13,3	10,1	10,1	77,456	0	50,729	20870000	6	CON__ENSEMBL:ENSBTAP00000016046	CON__ENSEMBL:ENSBTAP00000016046
38047000	6895200	6610600	0	0	3128300	0	0	0	0	0	0			+	0	8	8	6	27,6	27,6	19,4	53,661	0	188,18	192000000	21	CON__ENSEMBL:ENSBTAP00000018229;CON__Q3MHN5	CON__ENSEMBL:ENSBTAP00000018229;CON__Q3MHN5
3141100	1812200	0	0	0	0	0	0	0	0	0	0			+	0	4	4	4	8,3	8,3	8,3	55,207	0	25,4	23192000	6	CON__ENSEMBL:ENSBTAP00000018574	CON__ENSEMBL:ENSBTAP00000018574
1251299968	3107699968	1148199936	7200900	9245700	2682700	89361	0	0	193520	569110	178430			+	228420	56	56	50	48,5	48,5	44,6	164,34	0	323,31	11886000000	411	CON__ENSEMBL:ENSBTAP00000024146;P20742;F5GXY0;F8W7L3	CON__ENSEMBL:ENSBTAP00000024146
9634600	48296000	36218000	9390200	5845000	0	0	0	0	0	0	0			+	0	4	4	4	13,5	13,5	13,5	43,9	0	52,309	138440000	21	CON__ENSEMBL:ENSBTAP00000024466;CON__ENSEMBL:ENSBTAP00000024462	CON__ENSEMBL:ENSBTAP00000024466;CON__ENSEMBL:ENSBTAP00000024462
0	0	0	0	0	0	0	0	15518000	0	0	0	+		+	0	5	1	1	4,9	2	2	121,45	1	-2	66606000	1	CON__ENSEMBL:ENSBTAP00000031900	CON__ENSEMBL:ENSBTAP00000031900
0	9235700	3569000	0	0	0	0	0	0	0	0	0			+	0	4	2	2	6,9	3,6	3,6	92,273	0	12,195	15134000	2	CON__ENSEMBL:ENSBTAP00000032840	CON__ENSEMBL:ENSBTAP00000032840
13046000	25133000	11848000	0	0	0	0	0	0	0	0	0			+	0	9	9	9	21,1	21,1	21,1	65,19	0	61,727	90055000	28	CON__ENSEMBL:ENSBTAP00000037665	CON__ENSEMBL:ENSBTAP00000037665
0	0	2640000	0	0	0	0	0	0	0	0	0			+	0	2	1	1	27,5	15	15	8,5787	0,002924	6,8926	12909000	3	CON__ENSEMBL:ENSBTAP00000038329	CON__ENSEMBL:ENSBTAP00000038329
0	43213000	67327000	6303700	5239900	1267000	2083300	4575100	4174300	4926100	1252400	0			+	1721300	3	3	3	33,3	33,3	33,3	14,186	0	25,985	120710000	14	CON__P00711	CON__P00711
3219300096	4533700096	6161900032	7017200128	7336000000	3472199936	5061600256	5186299904	8922600448	7487699968	7202400256	5779899904			+	7183400000	10	10	10	49,8	49,8	49,8	24,409	0	323,31	96455000000	1642	CON__P00761	CON__P00761
47927000	0	0	0	0	0	0	0	0	0	0	0			+	0	5	5	5	19,6	19,6	19,6	39,234	0	58,133	241370000	16	CON__P00978	CON__P00978
5715500	19559000	6931200	0	0	0	0	0	0	0	0	0			+	0	3	3	3	5,5	5,5	5,5	68,709	0	24,549	58282000	11	CON__P01045-1;CON__P01044-1;CON__Q2KJ62	CON__P01045-1;CON__P01044-1;CON__Q2KJ62
0	0	0	0	0	7918200	6455600	0	0	0	0	0			+	6295900	4	2	2	43,7	26,1	26,1	15,184	0	13,274	171520000	20	CON__P01966	CON__P01966
3199200	19564000	21903000	20936000	18676000	17021000	46701000	30586000	18232000	21238000	54369000	56294000			+	93109000	22	6	3	48,5	19,7	11,2	51,621	0	135,01	632220000	64	CON__P02533;P02533;CON__P19012;CON__A2A4G1;P19012;CON__P19001;CON__Q61782;A8MT21;K7ENV3;CON__P35900;CON__Q9D312;P35900;K7EMS3;C9JTG5;CON__Q8N1A0;Q8N1A0	CON__P02533;P02533	Keratin, type I cytoskeletal 14	KRT14
0	0	3628300	3096700	0	0	0	0	0	0	5193900	5043900			+	4890600	33	3	2	55,1	6,6	3,5	60,044	0	25,968	267540000	21	CON__P02538;P02538;CON__O95678;O95678;CON__Q8VED5;CON__P12035;P12035;Q8IWY7	CON__P02538;P02538	Keratin, type II cytoskeletal 6A	KRT6A
1111800	9263200	14197000	7725200	11260000	8034700	14652000	17083000	23189000	39523000	23920000	19931000			+	28636000	4	4	4	28,1	28,1	28,1	22,975	0	34,176	148300000	52	CON__P02662	CON__P02662
0	464200000	685030016	350230016	105840000	0	0	0	0	0	0	0			+	31729000	3	3	3	13,5	13,5	13,5	24,348	0	40,67	1393500000	25	CON__P02663	CON__P02663
0	0	0	0	0	0	0	0	982450	0	0	0			+	0	1	1	1	9,1	9,1	9,1	23,583	0	10,414	12828000	4	CON__P02666	CON__P02666
0	71800000	112620000	36410000	13642000	0	0	4644100	6808400	8444200	0	6350700			+	6566400	2	2	2	16,6	16,6	16,6	18,974	0	84,036	211370000	9	CON__P02668	CON__P02668
0	106510000	226250000	116460000	73406000	2574000	1853700	4763700	3039100	16231000	1617400	2820000			+	3141500	6	6	6	50,6	50,6	50,6	18,281	0	151,54	497040000	40	CON__P02754	CON__P02754
103680000000	23928999936	34864001024	39798001664	49085001728	65171001344	61477998592	68666998784	78817001472	84705001472	62743998464	61161000960			+	65352000000	96	96	90	90,8	90,8	88,8	69,366	0	323,31	1063800000000	10809	CON__P02768-1;P02768;A0A0C4DGB6;H0YA55;B7WNR0;D6RHD5;C9JKR2;A0A087WWT3;H7C013	CON__P02768-1;P02768;A0A0C4DGB6;H0YA55;B7WNR0;D6RHD5;C9JKR2;A0A087WWT3	Serum albumin	ALB
5181799936	2472600064	1343399936	551830016	616720000	916409984	795840000	407780000	551449984	1330400000	425480000	809840000			+	157220000	52	46	46	74,6	69	69	69,293	0	323,31	39799000000	760	CON__P02769	CON__P02769
0	326030	0	0	0	0	0	0	0	0	0	0			+	0	1	1	1	1,1	1,1	1,1	138,44	0,0027933	6,6641	2324000	1	CON__P04258;P02461	CON__P04258;P02461	Collagen alpha-1(III) chain	COL3A1
0	0	0	0	0	0	2612800	0	0	0	0	0			+	0	33	1	0	55,1	1,8	0	59,998	0	7,1146	622460000	11	CON__P04259	CON__P04259
0	0	1134700	0	0	0	0	0	0	0	0	0			+	0	7	3	3	14,3	7,5	7,5	53,704	0	17,596	6747500	3	CON__P05787;P05787;F8VUG2;F8W1U3;F8VP67;CON__H-INV:HIT000292931;CON__Q9H552	CON__P05787;P05787;F8VUG2;F8W1U3;F8VP67;CON__H-INV:HIT000292931	Keratin, type II cytoskeletal 8	KRT8
15427000	60770000	26386000	0	0	0	0	0	0	0	0	0			+	0	7	7	7	10,5	10,5	10,5	91,215	0	43,827	173150000	15	CON__P06868	CON__P06868
8487700	33794000	58529000	40166000	33990000	26953000	46048000	38648000	18577000	25612000	65373000	85329000			+	110400000	26	22	15	58,8	53,5	38,9	51,267	0	323,31	2456800000	126	CON__P08779;P08779;CON__Q9Z2K1;CON__Q3ZAW8;K7ENW6	CON__P08779;P08779	Keratin, type I cytoskeletal 16	KRT16
452110016	274340000	173730000	2529300	2617200	1643500	523540	0	524070	0	813070	361880			+	603150	9	9	6	28,4	28,4	22,8	38,418	0	109,58	2683700000	51	CON__P12763	CON__P12763
442350016	508249984	1163299968	1776700032	732680000	526030016	1240499968	953870016	764569984	708419968	1287299968	1508999936			+	2935500000	34	34	28	54,3	54,3	48,2	59,51	0	323,31	15391000000	736	CON__P13645;P13645;CON__P02535-1;CON__Q7Z3Y7;Q7Z3Y7;CON__Q148H6;CON__P05784;CON__Q7Z3Z0;CON__Q7Z3Y8;CON__Q99456;CON__Q2M2I5;Q7Z3Z0;Q7Z3Y8;Q99456;Q2M2I5;F8VZY9;CON__Q92764;C4AM86;CON__A2AB72;CON__Q497I4;CON__Q7Z3Y9;CON__O76014;P05783;O76014;Q92764;Q7Z3Y9	CON__P13645;P13645	Keratin, type I cytoskeletal 10	KRT10
11715000	32613000	62493000	73970000	42567000	18555000	45937000	27306000	28920000	32058000	65126000	64646000			+	158800000	25	15	6	42,5	29	12,2	62,378	0	250,72	1093500000	132	CON__P13647;P13647;H0YI76;F8W0C6;H0YIN9;F8VV57;F8VU69	CON__P13647;P13647	Keratin, type II cytoskeletal 5	KRT5
195150000	88092000	67676000	4697500	2470400	1960200	1652600	1511300	795560	1318100	794340	885360			+	0	12	12	11	43,8	43,8	43,8	30,276	0	112,72	1196200000	44	CON__P15497	CON__P15497
0	0	0	0	0	0	0	0	9540900	0	0	0			+	0	2	1	1	7,5	4,9	4,9	38,252	0,0054348	6,5359	139720000	1	CON__P17690	CON__P17690
6734900	0	2591000	0	0	0	0	0	0	0	0	0			+	0	3	3	3	6,7	6,7	6,7	54,71	0	21,663	42525000	7	CON__P28800;C9JMH6;A0A0J9YY65;A0A0G2JPA8;P08697	CON__P28800
382580000	1577299968	306500000	24534000	15102000	18629000	551020	0	902710	722250	279940	0			+	381880	16	16	16	37,5	37,5	37,5	46,103	0	257,73	3798400000	140	CON__P34955	CON__P34955
0	0	213080	0	0	0	0	0	0	0	0	0			+	0	2	2	2	5,8	5,8	5,8	52,347	0	12,985	7179500	4	CON__P41361	CON__P41361
0	0	0	0	0	0	0	0	0	0	0	0			+	0	2	1	1	4,9	3,4	3,4	51,723	0	71,379	3353600	2	CON__P50448	CON__P50448
0	0	0	0	0	0	0	0	0	0	0	0			+	0	5	2	2	8,9	3,2	3,2	55,802	0	12,155	23687000	3	CON__P78386;P78386;F5GYI5;CON__Q61726	CON__P78386;P78386;F5GYI5;CON__Q61726	Keratin, type II cuticular Hb5	KRT85
0	0	0	0	0	0	91162000	97137000	98224000	112200000	87942000	80527000			+	155470000	3	3	3	27	27	27	11,202	0	60,073	432430000	16	CON__P81644	CON__P81644
1735700	2060300	2760900	3245700	1870400	1945000	2326000	1890000	1892600	1589400	2460100	3204400			+	4228500	25	19	13	55,6	47,2	35,4	48,105	0	323,31	2298700000	70	CON__Q04695;Q04695;F5GWP8;CON__Q9QWL7;K7EPJ9;K7ESE1;CON__P08727;P08727;C9JM50;K7ELP7;J3QR55;CON__Q9C075;CON__Q99PS0;Q9C075	CON__Q04695;Q04695;F5GWP8;CON__Q9QWL7;K7EPJ9	Keratin, type I cytoskeletal 17	KRT17
363440000	272289984	96040000	1044700	2132900	940200	0	804630	0	1377900	0	989050			+	1472200	25	23	22	48,2	46,4	45,1	75,829	0	323,31	2129800000	111	CON__Q29443;CON__Q0IIK2;CON__Q2HJF0	CON__Q29443;CON__Q0IIK2
16363000	158670000	19795000	0	1239900	1122000	0	0	0	0	0	0			+	0	13	13	13	17,7	17,7	17,7	99,536	0	105,64	399000000	46	CON__Q0V8M9;A0A087WW43;E7ET33;Q06033	CON__Q0V8M9
11317000	23355000	15665000	0	0	0	0	0	0	0	0	0			+	0	5	5	5	8,3	8,3	8,3	101,24	0	58,27	570960000	16	CON__Q0VCM5	CON__Q0VCM5
0	0	0	0	0	0	0	0	7876100	0	0	0			+	0	5	2	0	9	4,7	0	55,877	0	239,55	391810000	102	CON__Q14CN4-1;Q14CN4;CON__Q6IME9;CON__Q3SY84;Q3SY84;H0YIG3	CON__Q14CN4-1;Q14CN4;CON__Q6IME9	Keratin, type II cytoskeletal 72	KRT72
0	0	0	0	0	0	0	0	0	0	0	0			+	0	5	4	3	13,2	11,5	9,4	47,237	0	125,75	88650000	7	CON__Q9UE12;CON__Q15323;Q15323;CON__Q6NTB9;CON__O76009;CON__Q14525;O76009;Q14525;A0A140TA69;CON__Q14532;Q14532;CON__O76011;CON__A2A5Y0;CON__Q8IUT8;A0A140TA62;CON__O76015;CON__O76013;CON__REFSEQ:XP_986630;O76011;O76013;G3V1C2;CON__Q9D646;CON__Q6IFU5;Q6A162	CON__Q9UE12;CON__Q15323;Q15323;CON__Q6NTB9;CON__O76009;CON__Q14525;O76009;Q14525;A0A140TA69;CON__Q14532;Q14532	Keratin, type I cuticular Ha1;Keratin, type I cuticular Ha3-I;Keratin, type I cuticular Ha3-II;Keratin, type I cuticular Ha2	KRT31;KRT33A;KRT33B;KRT32
0	0	0	0	1509700	0	0	0	0	0	0	0			+	0	1	1	1	6,4	6,4	6,4	24,536	0	13,88	17638000	6	CON__Q1RMN8	CON__Q1RMN8
1912600	0	0	0	0	0	0	0	0	0	0	0			+	0	2	2	2	1,8	1,8	1,8	140,37	0	56,931	8923700	2	CON__Q28085	CON__Q28085
0	0	103380	0	0	0	0	0	0	0	0	0			+	0	1	1	1	3,5	3,5	3,5	38,348	0	7,3621	2211600	3	CON__Q2KIF2	CON__Q2KIF2
0	0	597310	0	0	0	0	0	0	0	0	0			+	0	2	1	1	4	2,6	2,6	53,553	0,0029499	6,9095	1924500	1	CON__Q2KJF1	CON__Q2KJF1
143480000	534249984	110150000	11300000	9567400	2598300	0	0	0	3352500	0	0			+	0	31	31	28	22,1	22,1	21	187,37	0	278,1	1344100000	100	CON__Q2UVX4;M0QYC8	CON__Q2UVX4
0	0	0	0	0	0	0	0	0	0	0	0			+	0	5	1	0	7,4	2,2	0	58,923	0	8,1042	1953900	1	CON__Q32MB2;Q86Y46	CON__Q32MB2;Q86Y46	Keratin, type II cytoskeletal 73	KRT73
18632000	44661000	26542000	5570000	0	0	0	0	0	0	0	0			+	0	11	11	11	20,1	20,1	20,1	85,411	0	79,215	165020000	27	CON__Q3KUS7	CON__Q3KUS7
8858700	11092000	8187300	3440500	4776500	0	0	0	0	0	0	0			+	0	4	3	3	25,4	20,4	20,4	22,06	0	62,782	79657000	10	CON__Q3SX09;CON__P02070;A8MUF7;E9PEW8;E9PBW4;E9PFT6;P69892;P69891;P02100	CON__Q3SX09;CON__P02070
0	0	0	0	401820	0	0	0	0	0	0	0			+	0	8	1	1	12,4	1	1	85,686	0	7,1566	42327000	7	CON__Q3SX14;A0A0U1RQL8;Q5T0I0	CON__Q3SX14
78479000	9235100	5469300	2020900	2802400	1647500	0	0	0	0	2026200	4206500			+	0	12	12	9	28	28	22,5	68,587	0	114,12	308710000	30	CON__Q3SZ57	CON__Q3SZ57
3407100	13490000	2382600	0	0	0	0	0	0	0	0	0			+	0	5	5	5	19,3	19,3	19,3	45,456	0	37,893	35748000	12	CON__Q3SZH5	CON__Q3SZH5
28073000	34293000	9864000	0	0	0	0	0	0	0	0	0			+	0	3	3	3	22,8	22,8	22,8	23,182	0	22,411	196140000	17	CON__Q3SZR3	CON__Q3SZR3
58421000	152300000	64498000	1646100	2057200	2841100	0	0	0	0	0	0			+	0	22	22	20	32,2	32,2	30,2	101,51	0	215,13	870910000	72	CON__Q3T052	CON__Q3T052
0	40790000	15275000	0	0	0	0	0	0	0	0	0			+	0	3	3	3	15	15	15	26,133	0	75,564	105790000	9	CON__Q3Y5Z3	CON__Q3Y5Z3
2193000	909920	0	0	0	0	0	0	0	0	0	0			+	0	3	3	3	7	7	7	54,099	0	17,193	13469000	3	CON__Q3ZBS7;P04004	CON__Q3ZBS7
24781000	71348000	15151000	0	3715800	2668900	0	0	0	0	0	0			+	0	6	6	6	22	22	22	42,663	0	52,713	255550000	21	CON__Q58D62	CON__Q58D62
0	0	0	0	390740	0	0	0	0	0	0	0			+	0	1	1	1	0,5	0,5	0,5	248,07	0,002907	6,8654	1668800	4	CON__Q5D862;Q5D862	CON__Q5D862;Q5D862	Filaggrin-2	FLG2
0	0	0	0	0	0	0	0	0	0	0	0			+	0	5	2	2	8,6	3,7	3,7	57,809	0	11,636	7786600	3	CON__Q5XKE5;Q5XKE5	CON__Q5XKE5;Q5XKE5	Keratin, type II cytoskeletal 79	KRT79
0	0	0	0	0	0	0	0	142230	0	0	0			+	0	5	1	1	8,4	2,1	2,1	61,358	0,0028249	6,7368	1695200	3	CON__Q6IFZ6;CON__Q7Z794;Q7Z794	CON__Q6IFZ6;CON__Q7Z794;Q7Z794	Keratin, type II cytoskeletal 1b	KRT77
0	0	0	0	0	0	1135200	0	0	0	0	0			+	0	2	2	2	3,4	3,4	3,4	282,39	0	12,604	5768100	7	CON__Q86YZ3;Q86YZ3	CON__Q86YZ3;Q86YZ3	Hornerin	HRNR
7628300	18931000	3587600	770560	0	1102100	0	0	1393300	13706000	5351600	12308000			+	0	9	9	7	27,4	27,4	21,2	46,228	0	130,54	101270000	35	CON__Q95121;I3L425;I3L3Z3;I3L1U4	CON__Q95121
262800000	612880000	259110000	2727300	1677800	1866100	0	0	0	0	0	0			+	0	20	20	20	28,3	28,3	28,3	106,19	0	182,79	2316300000	110	CON__Q9TRI1;Q5T985;P19823;Q5T987	CON__Q9TRI1
0	0	0	0	0	0	0	0	1341600	0	0	0			+	0	1	1	1	2,4	2,4	2,4	46,017	0	14,776	22862000	34	CON__Q9TT36;P05543	CON__Q9TT36;P05543	Thyroxine-binding globulin	SERPINA7
4103500	0	0	0	0	0	0	0	0	0	0	0			+	0	2	2	2	5,1	5,1	5,1	46,203	0	14,99	24534000	6	CON__Q9TTE1;CON__A2I7N1;CON__A2I7N0	CON__Q9TTE1;CON__A2I7N1;CON__A2I7N0
1113000	3674500	942260	0	0	0	0	0	0	0	0	0			+	0	2	2	1	4,6	4,6	2,2	46,897	0	13,862	12317000	7	CON__REFSEQ:XP_001252647;CON__A2I7N3	CON__REFSEQ:XP_001252647;CON__A2I7N3
0	0	0	0	0	0	0	0	0	0	0	0			+	0	2	1	1	3,8	2,6	2,6	69,561	0,002809	6,7032	2153200	2	CON__REFSEQ:XP_585019	CON__REFSEQ:XP_585019
4299800	1509800	1780700	876560	1907300	1323600	675050	734620	1443700	622360	767760	636440				0	2	2	2	7,9	7,9	7,9	30,302	0	28,405	40989000	16	D6R9P3;D6RD18;D6RBZ0;Q99729	D6R9P3;D6RD18;D6RBZ0;Q99729	Heterogeneous nuclear ribonucleoprotein A/B	HNRNPAB
13843000	11842000	14761000	7758400	13994000	5191900	4072800	4009900	12175000	3332400	6395100	3331300				0	4	4	4	22,6	22,6	22,6	23,076	0	69,195	177530000	46	D6RAF8;Q14103;D6RF44;H0YA96;H0Y8G5;D6RD83;D6RBQ9;A0A087WUK2;O14979	D6RAF8;Q14103;D6RF44;H0YA96;H0Y8G5;D6RD83;D6RBQ9	Heterogeneous nuclear ribonucleoprotein D0	HNRNPD
2664100	0	0	0	0	0	0	0	0	0	0	0				0	3	3	3	12,6	12,6	12,6	23,174	0	18,126	39535000	9	D6RE83;P09936;D6R974;D6R956;D6RF53	D6RE83;P09936;D6R974;D6R956	Ubiquitin carboxyl-terminal hydrolase;Ubiquitin carboxyl-terminal hydrolase isozyme L1	UCHL1
0	5178000	0	8615300	8864900	28852000	9274200	15188000	7964800	11541000	12951000	13816000				12191000	8	6	6	22,1	13,9	13,9	53,02	0	37,493	211860000	34	D6RF35;P02774;D6RBJ7;D6RF20	D6RF35;P02774;D6RBJ7	Vitamin D-binding protein	GC
0	0	0	0	0	0	0	1328800	0	0	0	0				0	1	1	1	2,8	2,8	2,8	39,264	0,0028571	6,7625	9925300	2	Q86W61;D6RGZ6;E9PF17;P13611	Q86W61;D6RGZ6;E9PF17;P13611	Versican core protein	VCAN
0	0	0	0	0	0	0	2327200	0	0	0	0				0	1	1	1	1,7	1,7	1,7	173,48	0,0079576	6,4185	30179000	1	E2RYF6	E2RYF6	Mucin-22	MUC22
1619300	1338700	0	2759200	0	10653000	1634900	2079900	0	0	0	0				0	2	2	2	24,1	24,1	24,1	9,4069	0	15,713	52342000	30	E5RJF6;E5RJI8;E5RH81;H0YBE2;E5RFE7;E5RHP7;P00915;E5RG81	E5RJF6;E5RJI8;E5RH81;H0YBE2;E5RFE7;E5RHP7;P00915;E5RG81	Carbonic anhydrase 1	CA1
0	0	0	0	0	0	0	0	0	0	0	0				0	1	1	1	23,9	23,9	23,9	5,4292	0	7,2013	15824000	2	E5RIP1;E5RJX2;P60866	E5RIP1;E5RJX2;P60866	40S ribosomal protein S20	RPS20
0	0	0	0	0	0	0	4625500	0	0	0	0				0	1	1	1	23,5	23,5	23,5	8,9413	0,0055096	6,5859	20432000	1	F5H431;F5GZK7;E7EN77;Q15021	F5H431;F5GZK7;E7EN77;Q15021	Condensin complex subunit 1	NCAPD2
0	0	0	0	0	1451800	0	0	0	0	0	0				0	1	1	1	23,4	23,4	23,4	5,3212	0,008	6,4613	16247000	1	H0YLJ8;H0YL94;H0YMN7;E9PLD0;E7END7;H0YNE9;P61026;Q9H0U4;Q92928;P51153;P62820;Q92930;P61006;P59190	H0YLJ8;H0YL94;H0YMN7;E9PLD0;E7END7;H0YNE9;P61026;Q9H0U4;Q92928;P51153;P62820;Q92930;P61006;P59190	Ras-related protein Rab-10;Ras-related protein Rab-1B;Putative Ras-related protein Rab-1C;Ras-related protein Rab-13;Ras-related protein Rab-1A;Ras-related protein Rab-8B;Ras-related protein Rab-8A;Ras-related protein Rab-15	RAB8B;RAB1B;RAB1A;RAB10;RAB1C;RAB13;RAB8A;RAB15
10404000	4025200	4510000	5288500	5431700	13566000	1274100	1165600	0	670460	822080	827710				0	6	6	6	9,7	9,7	9,7	69,371	0	52,143	96286000	21	E7EQR4;P15311;P26038;P35241;V9GZ54;E9PQ82;E9PNV3	E7EQR4;P15311;P26038;P35241	Ezrin;Moesin;Radixin	EZR;MSN;RDX
0	10624000	6057000	10823000	15598000	10841000	25163000	28598000	17312000	17337000	29431000	29362000				28401000	7	7	7	17,5	17,5	17,5	65,059	0	107,06	240430000	75	G3XAM2;E7ETH0;P05156;A0A087X0I2;D6R9Z8;CON__Q32PI4	G3XAM2;E7ETH0;P05156	Complement factor I;Complement factor I heavy chain;Complement factor I light chain	CFI
0	0	0	0	0	0	0	0	0	0	0	0				0	4	4	3	35,7	35,7	28	17,916	0	28,59	33595000	8	E9PI65;P11142;E9PQQ4;E9PQK7;E9PK54;E9PLF4;E9PN89;E9PKE3;P54652	E9PI65;P11142;E9PQQ4;E9PQK7;E9PK54;E9PLF4;E9PN89;E9PKE3;P54652	Heat shock cognate 71 kDa protein;Heat shock-related 70 kDa protein 2	HSPA8;HSPA2
7853400	0	0	0	0	4410100	0	0	0	0	0	0				0	4	4	4	35,6	35,6	35,6	16,811	0	26,399	62854000	5	G3V1A4;E9PP50;E9PK25;P23528;E9PQB7;E9PLJ3;Q9Y281;E9PS23	G3V1A4;E9PP50;E9PK25;P23528;E9PQB7;E9PLJ3;Q9Y281	Cofilin-1;Cofilin-2	CFL1;CFL2
877380	0	672140	0	542800	0	0	0	0	0	0	0				0	3	3	3	11,4	11,4	11,4	37,709	0	17,078	7521500	3	E9PKG1;Q99873;E9PIX6;E9PNR9;E9PQ98;H0YDE4	E9PKG1;Q99873;E9PIX6	Protein arginine N-methyltransferase 1	PRMT1
0	0	0	0	2395600	0	0	0	0	0	0	0				0	1	1	1	7,4	7,4	7,4	16,18	0	10,39	22689000	4	E9PP36;E9PKZ0;E9PKU4;P62917	E9PP36;E9PKZ0;E9PKU4;P62917	60S ribosomal protein L8	RPL8
6690400	7821600	6792500	4215900	5938200	0	0	0	0	0	0	0				0	4	4	4	21,6	21,6	21,6	25,371	0	26,535	61611000	11	E9PL09;P23396;E9PPU1;H0YEU2;F2Z2S8;H0YF32;H0YCJ7;E9PQ96;E9PSF4;E9PJH4;E9PK82	E9PL09;P23396;E9PPU1;H0YEU2;F2Z2S8;H0YF32;H0YCJ7	40S ribosomal protein S3	RPS3
8102200	5718100	7938900	5970000	8289900	5915100	5140100	0	0	4017700	5103000	3987800				0	4	4	4	5,1	5,1	5,1	102,99	0	24,108	115490000	8	E9PLK3;P55786;A6NEC2;H0YCQ5;E9PJ74;H0YDG0;E9PRQ5	E9PLK3;P55786;A6NEC2	Puromycin-sensitive aminopeptidase;Puromycin-sensitive aminopeptidase-like protein	NPEPPS;NPEPPSL1
0	0	3564300	0	0	0	0	0	0	0	0	0				0	1	1	1	3,5	3,5	3,5	35,328	0,0029155	6,8841	16303000	2	F2Z393;P37837	F2Z393;P37837	Transaldolase	TALDO1
3075400	3141800	2846200	10319000	13120000	7197700	54295000	69866000	46705000	6134200	9759200	7799000				0	5	5	5	28,9	28,9	28,9	17,47	0	68,465	217630000	30	F5GY03;P09486;E5RK62	F5GY03;P09486;E5RK62	SPARC	SPARC
0	0	0	0	10396000	0	0	0	0	0	0	0				0	1	1	1	5,7	5,7	5,7	15,646	0,0054201	6,5276	65978000	5	Q68DM5;F5GYA2	Q68DM5;F5GYA2	Uracil-DNA glycosylase	DKFZp781L1143;UNG
0	0	0	0	0	0	0	0	0	0	0	0				0	1	1	1	35	35	35	4,5987	0,0055249	6,5927	6447100	4	F5H4G3;F5GZF6;F5H366;F5H2I9;Q6J9G0	F5H4G3;F5GZF6;F5H366;F5H2I9;Q6J9G0	Tyrosine-protein kinase STYK1	STYK1
368020	227280	341380	242900	224410	0	0	0	0	0	0	0				0	2	2	2	4,3	4,3	4,3	64,872	0	12,26	7355900	2	F5GZS6;J3KPF3;P08195;H0YFX4;F5GZI0	F5GZS6;J3KPF3;P08195;H0YFX4;F5GZI0	4F2 cell-surface antigen heavy chain	SLC3A2
0	0	0	0	0	242750	0	0	0	0	0	0				0	2	2	2	24,5	24,5	24,5	11,618	0	22,864	5322200	3	F5H0C7;F5H423;P84077;P61204;F5H1V1;F5H6T5;F8WDB3;C9JPM4;C9J1Z8;P84085;P18085	F5H0C7;F5H423;P84077;P61204;F5H1V1;F5H6T5;F8WDB3;C9JPM4;C9J1Z8;P84085;P18085	ADP-ribosylation factor 1;ADP-ribosylation factor 3;ADP-ribosylation factor 5;ADP-ribosylation factor 4	ARF3;ARF1;ARF4;ARF5
0	4899700	4154700	0	0	0	0	0	0	0	0	0				0	4	4	4	4,5	4,5	4,5	110,61	0	32,389	20389000	5	F5H2F4;P11586;V9GYY3	F5H2F4;P11586	C-1-tetrahydrofolate synthase, cytoplasmic;Methylenetetrahydrofolate dehydrogenase;Methenyltetrahydrofolate cyclohydrolase;Formyltetrahydrofolate synthetase;C-1-tetrahydrofolate synthase, cytoplasmic, N-terminally processed	MTHFD1
16026000	10057000	3590800	5799800	5687700	28199000	1766100	2472300	2099500	2058000	0	1194500				0	10	10	5	24,3	24,3	13,5	57,73	0	75,236	245730000	43	F5H5D3;Q9BQE3;Q71U36;P68363;A0A1W2PQM2;Q13748;Q6PEY2;F8VVB9;C9J2C0;P68366;V9GZ17;F8VRZ4;F8VS66;F8VQQ4;F8VRK0;F8VX09;F8VWV9;C9JDS9;A6NHL2;F8VXZ7;F8W0F6;Q9H853	F5H5D3;Q9BQE3;Q71U36;P68363;A0A1W2PQM2;Q13748;Q6PEY2;F8VVB9;C9J2C0;P68366	Tubulin alpha-1C chain;Tubulin alpha-1A chain;Tubulin alpha-1B chain;Tubulin alpha-3C/D chain;Tubulin alpha-3E chain;Tubulin alpha-4A chain	TUBA1C;TUBA1A;TUBA1B;TUBA3C;TUBA3E;TUBA8;TUBA4A
0	0	0	0	0	0	0	0	2077600	0	0	0				0	2	2	2	16,4	16,4	16,4	16,219	0	12,964	16438000	3	H7C3I1;F6VDH7;Q3KNR6;Q8IZP2;P50502;Q8NFI4	H7C3I1;F6VDH7;Q3KNR6;Q8IZP2;P50502;Q8NFI4	Putative protein FAM10A4;Hsc70-interacting protein;Putative protein FAM10A5	ST13;ST13P4;ST13P5
0	0	0	0	0	29652	0	0	0	0	0	0				0	1	1	1	23,8	23,8	23,8	7,1906	0,0028329	6,7439	791140	2	F8VR69;F8VZ45;U3KQR5;Q02878	F8VR69;F8VZ45;U3KQR5;Q02878	60S ribosomal protein L6	RPL6
13372000	12473000	5157700	2367500	4266700	3909500	2224600	1839100	2234000	0	1494100	0				0	5	5	5	42,1	42,1	42,1	16,536	0	32,315	153690000	19	F8VTQ5;F8W6I7;P09651;F8VZ49;Q32P51;F8VYN5;F8W646;H0YH80	F8VTQ5;F8W6I7;P09651;F8VZ49;Q32P51	Heterogeneous nuclear ribonucleoprotein A1;Heterogeneous nuclear ribonucleoprotein A1, N-terminally processed;Heterogeneous nuclear ribonucleoprotein A1-like 2	HNRNPA1;HNRNPA1L2
2165200	3356900	2768300	0	2463200	4839300	1932300	2022900	1952900	1467500	0	0				0	4	4	4	17,8	17,8	17,8	27,187	0	28,001	49120000	13	F8VU65;P05388;F8VPE8;G3V210;F8VW21;F8VWS0;Q8NHW5;F8VS58;F8VQY6;F8VRK7;F8VZS0;F8VWV4	F8VU65;P05388;F8VPE8;G3V210;F8VW21;F8VWS0;Q8NHW5;F8VS58;F8VQY6;F8VRK7;F8VZS0	60S acidic ribosomal protein P0;60S acidic ribosomal protein P0-like	RPLP0;RPLP0P6
0	0	0	0	0	0	0	0	12190000	0	0	0				0	2	2	2	1,5	1,5	1,5	203,78	0	11,338	108100000	7	F8WAE6;Q86YW9	F8WAE6;Q86YW9	Mediator of RNA polymerase II transcription subunit 12-like protein	MED12L
4064300	3086900	2291700	4575500	4835700	9005900	11797000	16081000	6318600	19210000	15135000	10918000				16621000	5	5	5	11,7	11,7	11,7	63,463	0	55,664	123470000	29	F8WF14;P06276;F8WEX7;H7C4Y0;H0Y885	F8WF14;P06276;F8WEX7	Carboxylic ester hydrolase;Cholinesterase	BCHE
0	0	0	0	0	2120300	0	0	0	0	0	0				0	1	1	1	4,8	4,8	4,8	24,594	0,002849	6,753	8385700	3	G3XAL0;P40926	G3XAL0;P40926	Malate dehydrogenase;Malate dehydrogenase, mitochondrial	MDH2
6289400	1633000	1861900	1588600	2059500	1512000	0	0	1541200	0	0	0				0	5	5	5	5,6	5,6	5,6	123,75	0	29,328	34927000	7	H0Y8C6;O00410	H0Y8C6;O00410	Importin-5	IPO5
0	5141400	10458000	6686600	12348000	3608800	0	0	0	0	0	0				0	3	3	3	19,7	19,7	19,7	21,934	0	22,513	55952000	10	H0YAF8;J3KPE3;H0Y8W2;P63244;D6RAU2;E9PD14;D6RFX4;D6RFZ9;D6RHH4;D6R9Z1;H0YAM7;D6R9L0;H0Y9P0;D6RF23;D6RAC2;D6REE5	H0YAF8;J3KPE3;H0Y8W2;P63244;D6RAU2;E9PD14;D6RFX4;D6RFZ9;D6RHH4;D6R9Z1;H0YAM7;D6R9L0	Guanine nucleotide-binding protein subunit beta-2-like 1;Guanine nucleotide-binding protein subunit beta-2-like 1, N-terminally processed	GNB2L1
0	2038000	2074200	2888400	3285300	1971200	3487300	3595900	0	0	0	0				0	2	2	2	12,3	12,3	12,3	33,419	0	13,353	29324000	15	H0YC35;P10909;H0YAS8;E7ERK6;H0YLK8	H0YC35;P10909;H0YAS8;E7ERK6;H0YLK8	Clusterin;Clusterin;Clusterin beta chain;Clusterin alpha chain	CLU
0	0	0	0	0	0	0	0	2899000	0	0	0				0	1	1	1	1,9	1,9	1,9	81,066	0	20,402	199760000	25	H0YEM4;Q502W6	H0YEM4;Q502W6	von Willebrand factor A domain-containing protein 3B	VWA3B
0	692700	0	756240	0	1237500	0	0	735190	0	0	0				0	4	4	4	15,2	15,2	15,2	38,138	0	23,511	21381000	4	H0YH81;P06576;F8W079;F8W0P7;H0YI37	H0YH81;P06576;F8W079;F8W0P7	ATP synthase subunit beta;ATP synthase subunit beta, mitochondrial	ATP5B
0	0	0	0	3300600	0	0	0	0	0	0	0				0	1	1	1	8,3	8,3	8,3	24,16	0	10,531	19693000	3	H0YK49;H0YL12;H0YNX6;H0YLU7;P13804	H0YK49;H0YL12;H0YNX6;H0YLU7;P13804	Electron transfer flavoprotein subunit alpha, mitochondrial	ETFA
0	0	0	0	0	0	0	0	0	0	0	0				0	1	1	1	8	8	8	13,948	0,0028653	6,7797	6386600	1	H0YLS6;H0YLC2;H0YKT8;H0YMI6;H0YMA1;H0YMZ1;H0YN18;H0YL69;P25789	H0YLS6;H0YLC2;H0YKT8;H0YMI6;H0YMA1;H0YMZ1;H0YN18;H0YL69;P25789	Proteasome subunit alpha type;Proteasome subunit beta type;Proteasome subunit alpha type-4	PSMA4
1807500	0	0	0	0	0	0	0	0	0	0	0				0	2	2	2	22	22	22	11,477	0	12,581	23156000	2	I3L3P7;I3L246;H3BN98;P62244	I3L3P7;I3L246;H3BN98;P62244	40S ribosomal protein S15a	RPS15A
0	0	0	0	0	0	0	8319400	0	0	0	0				0	1	1	1	2,1	2,1	2,1	47,757	0	7,5992	19105000	4	H3BTH8;Q96S86;Q86UW8	H3BTH8;Q96S86;Q86UW8	Hyaluronan and proteoglycan link protein 3;Hyaluronan and proteoglycan link protein 4	HAPLN3;HAPLN4
0	0	0	0	0	0	2690800	2945000	2567100	13653000	5791100	11163000				0	2	2	2	6,4	6,4	6,4	70,733	0	15,763	20049000	11	H7BXV5;P39060;H7C457	H7BXV5;P39060;H7C457	Collagen alpha-1(XVIII) chain;Endostatin	COL18A1
0	0	0	0	1871200	0	0	0	0	0	0	0				0	1	1	1	0,5	0,5	0,5	185,87	0,0054054	6,5033	12433000	2	H7BZ55	H7BZ55	Putative ciliary rootlet coiled-coil protein-like 3 protein
0	0	0	0	0	2403900	0	0	0	0	0	0				0	1	1	1	11,4	11,4	11,4	13,519	0	64,606	3054400	2	H7BZJ3	H7BZJ3		PDIA3
714400	1025200	1317900	2941100	2631000	0	8846300	9116000	2775900	1955100	0	1504400				0	2	2	2	2,8	2,8	2,8	79,755	0	17,144	34944000	20	H7C1W1;Q92626	H7C1W1;Q92626	Peroxidasin homolog	PXDN
0	0	0	0	10283000	0	0	0	0	0	0	0				0	7	2	2	10,9	3,9	3,9	94,825	0	12,359	73586000	2	H9KV75;P12814;H7C5W8;H0YJ11;H0YJW3;G3V2W4;P35609;G3V2E8;G3V5M4;G3V2X9;K7EJH8;G3V2N5;F6THM6;A0A087WSZ2;Q08043	H9KV75;P12814;H7C5W8;H0YJ11;H0YJW3	Alpha-actinin-1	ACTN1
0	0	0	0	0	0	0	0	17573000	0	0	0	+			0	1	1	1	0,9	0,9	0,9	152,53	1	-2	68061000	3	I1E4Y6;Q6Y7W6	I1E4Y6;Q6Y7W6	PERQ amino acid-rich with GYF domain-containing protein 2	GIGYF2
0	0	0	0	0	0	0	0	186570000	0	0	0				0	1	1	1	7,4	7,4	7,4	25,922	0	8,4042	788410000	29	I3L4V6	I3L4V6		NXN
0	0	0	0	0	0	0	0	0	0	3753700	9664700				0	5	2	2	8,7	3,2	3,2	70,449	0	12,638	9206100	6	J3KMX3;P02771	J3KMX3;P02771	Alpha-fetoprotein	AFP
77907000	107060000	75125000	31460000	111180000	73945000	14095000	18259000	29818000	18848000	27628000	24797000				0	14	14	13	45,7	45,7	43,8	39,817	0	121,45	942230000	86	J3KPS3;P04075;H3BQN4;H3BPS8;H3BUH7;H3BR04;H3BMQ8;H3BU78;H3BR68;A0A087WXX2;P05062	J3KPS3;P04075;H3BQN4;H3BPS8;H3BUH7;H3BR04;H3BMQ8	Fructose-bisphosphate aldolase;Fructose-bisphosphate aldolase A	ALDOA
4833200	0	0	0	3994100	0	0	0	0	0	0	0				0	5	5	5	36,8	36,8	36,8	18,043	0	40,487	88862000	5	J3QLN6;J3QR64;J3KTB5;J3QL43;J3QS69;J3KT12;P60842;J3QKZ9;J3KS25;J3KSZ0;E7EQG2;Q14240;J3KT04;J3KS93;E7EMV8;J3KSN7;J3KTN0	J3QLN6;J3QR64;J3KTB5;J3QL43;J3QS69;J3KT12;P60842;J3QKZ9;J3KS25;J3KSZ0;E7EQG2;Q14240	Eukaryotic initiation factor 4A-I;Eukaryotic initiation factor 4A-II;Eukaryotic initiation factor 4A-II, N-terminally processed	EIF4A1;EIF4A2
0	0	599580	0	0	0	0	0	0	0	0	0				0	1	1	1	4,7	4,7	4,7	17,546	0	15,232	5158100	3	J3QLE5;P63162;P14678	J3QLE5;P63162;P14678	Small nuclear ribonucleoprotein-associated protein N;Small nuclear ribonucleoprotein-associated proteins B and B	SNRPN;SNRPB
0	0	0	0	0	0	0	0	0	0	0	0				0	1	1	1	17,3	17,3	17,3	8,3926	0	7,3359	7508400	1	J3QLI9;P62314	J3QLI9;P62314	Small nuclear ribonucleoprotein Sm D1	SNRPD1
0	0	0	0	0	0	0	0	0	0	0	0				0	1	1	1	23,4	23,4	23,4	5,0827	0	7,3549	9063200	3	K7EJT5;K7EP65;K7EKS7;K7ELC4;K7EMH1;K7ERI7;P35268	K7EJT5;K7EP65;K7EKS7;K7ELC4;K7EMH1;K7ERI7;P35268	60S ribosomal protein L22	RPL22
0	0	0	0	0	0	0	0	18055000	0	0	0				0	1	1	1	6,5	6,5	6,5	22,05	0,0055556	6,6113	69522000	3	K7ELG0;Q96R06	K7ELG0;Q96R06	Sperm-associated antigen 5	SPAG5
3899100	9200000	6347800	4455500	14648000	4903100	0	2841200	3118500	0	0	2324800				0	4	4	4	36,2	36,2	36,2	17,293	0	33,151	64578000	10	K7EMN2;K7EM49;P52209;K7EPF6	K7EMN2;K7EM49;P52209;K7EPF6	6-phosphogluconate dehydrogenase, decarboxylating	PGD
906400	789590	751310	0	0	0	0	0	0	0	0	0				0	2	2	2	34	34	34	5,5575	0	12,06	16563000	8	M0QX76;M0R1M5;M0R3H0;M0R210;Q6IPX4;P62249	M0QX76;M0R1M5;M0R3H0;M0R210;Q6IPX4;P62249	40S ribosomal protein S16	RPS16
1399800	0	0	0	0	0	0	0	0	0	0	0				0	2	2	2	16,1	16,1	16,1	13,997	0	14,907	5909900	2	M0QZC5;P62280	M0QZC5;P62280	40S ribosomal protein S11	RPS11
0	913370	2847100	70742000	83842000	105950000	17461000	16625000	11011000	0	0	0				0	8	8	8	29,2	29,2	29,2	40,92	0	62,709	278350000	50	O00292;O75610;A0A087WW09	O00292;O75610	Left-right determination factor 2;Left-right determination factor 1	LEFTY2;LEFTY1
0	0	0	0	0	0	0	0	1291600	0	0	0				0	1	1	1	7,5	7,5	7,5	26,922	0	22,833	16686000	7	O00299	O00299	Chloride intracellular channel protein 1	CLIC1
0	0	0	2686300	0	0	0	0	0	0	0	0				0	2	2	2	5,2	5,2	5,2	82,577	0	11,842	13807000	3	O00391;A8MXT8	O00391;A8MXT8	Sulfhydryl oxidase 1	QSOX1
0	0	0	0	0	0	0	2319700	0	0	0	0				0	1	1	1	2,3	2,3	2,3	58,635	0,0029412	6,9042	53062000	3	O00592	O00592	Podocalyxin	PODXL
3835100	4163700	9106900	2384700	2509900	1522000	920210	1192700	1309600	1325700	0	0				0	4	4	4	4,3	4,3	4,3	123,38	0	28,113	58128000	20	O14980;H7BZC5;C9IZS4;C9JQ02;C9JV99;C9J673;C9JKM9	O14980	Exportin-1	XPO1
0	0	0	0	2298100	0	0	0	0	0	0	0				0	2	2	2	1,6	1,6	1,6	144,73	0	13,409	6936800	3	O15067;J3KTQ5	O15067;J3KTQ5	Phosphoribosylformylglycinamidine synthase	PFAS
0	0	15689000	18707000	11078000	0	0	0	0	0	0	0				0	2	2	2	2,4	2,4	2,4	104,74	0	12,06	48380000	4	O15327;E9PG59;E9PHC0;D6RJC3;E7EQN9	O15327;E9PG59;E9PHC0;D6RJC3;E7EQN9	Type II inositol 3,4-bisphosphate 4-phosphatase	INPP4B
0	0	0	0	0	0	0	0	0	0	0	0	+			0	1	1	1	4,6	4,6	4,6	28,87	1	-2	0	1	Q9UG54;O43318	Q9UG54;O43318	Mitogen-activated protein kinase kinase kinase 7	DKFZp586F0420;MAP3K7
13709000	20254000	22935000	9535300	16005000	15012000	2997800	3547700	4013500	1697200	2764300	2266600				0	8	8	3	11,7	11,7	5,4	104,85	0	103,19	211760000	46	O43707;H7C144;F5GXS2	O43707;H7C144;F5GXS2	Alpha-actinin-4	ACTN4
0	18114000	16853000	50772000	8699000	0	5508400	6161000	0	0	4753300	0				0	2	2	2	15,1	15,1	15,1	18,804	0	106,27	102590000	25	U3KQK0;Q99880;Q99879;Q99877;Q93079;Q5QNW6;P62807;P58876;P57053;O60814;Q8N257;Q16778;P33778;P23527;P06899	U3KQK0;Q99880;Q99879;Q99877;Q93079;Q5QNW6;P62807;P58876;P57053;O60814;Q8N257;Q16778;P33778;P23527;P06899	Histone H2B;Histone H2B type 1-L;Histone H2B type 1-M;Histone H2B type 1-N;Histone H2B type 1-H;Histone H2B type 2-F;Histone H2B type 1-C/E/F/G/I;Histone H2B type 1-D;Histone H2B type F-S;Histone H2B type 1-K;Histone H2B type 3-B;Histone H2B type 2-E;Histone H2B type 1-B;Histone H2B type 1-O;Histone H2B type 1-J	HIST1H2BN;HIST1H2BL;HIST1H2BM;HIST1H2BH;HIST2H2BF;HIST1H2BC;HIST1H2BD;H2BFS;HIST1H2BK;HIST3H2BB;HIST2H2BE;HIST1H2BB;HIST1H2BO;HIST1H2BJ
0	0	0	0	0	0	0	0	2406100	0	0	0				0	1	1	1	3,6	3,6	3,6	37,329	0,005571	6,6162	23408000	7	O60911	O60911	Cathepsin L2	CTSV
0	0	0	0	0	0	0	0	0	0	0	0				0	6	3	3	3,1	1,8	1,8	278,16	0	19,779	17706000	5	O75369;E7EN95	O75369;E7EN95	Filamin-B	FLNB
880410	0	0	0	0	0	0	0	0	0	0	0				0	2	2	2	1,9	1,9	1,9	145,83	0	10,883	9683000	3	O75533;H7C341	O75533;H7C341	Splicing factor 3B subunit 1	SF3B1
32979000	60337000	64340000	14916000	44111000	27259000	5488500	5508800	21336000	4206900	5845100	3847800				0	8	8	8	22,9	22,9	22,9	46,659	0	67,296	354860000	48	O75874;C9J4N6;C9JJE5;C9JLU6;P48735	O75874;C9J4N6	Isocitrate dehydrogenase [NADP] cytoplasmic	IDH1
28185000	27558000	50243000	74027000	85012000	67555000	67878000	77395000	81670000	90574000	78834000	77208000				69512000	12	12	12	9,6	9,6	9,6	158,54	0	300,28	802240000	154	O75882	O75882	Attractin	ATRN
0	0	0	0	1942900	0	0	0	0	0	0	0				0	1	1	1	2,1	2,1	2,1	69,223	0	7,2749	11490000	4	O76031	O76031	ATP-dependent Clp protease ATP-binding subunit clpX-like, mitochondrial	CLPX
0	0	2256500	5479600	4713900	2987200	9394600	11744000	4132700	4174200	4457800	4388500				0	4	4	4	6,3	6,3	6,3	88,039	0	30,086	54120000	15	Q5SR54;O94985	Q5SR54;O94985	Calsyntenin-1;Soluble Alc-alpha;CTF1-alpha	CLSTN1
0	11693000	11843000	20534000	22036000	220520000	4495800	0	8380500	0	0	0				0	6	6	6	42,3	42,3	42,3	30,083	0	50,1	297050000	21	O95813	O95813	Cerberus	CER1
53001000	56912000	56222000	48846000	80362000	60411000	23399000	23546000	60392000	34807000	33664000	21137000				0	10	9	9	31,3	27,7	27,7	36,688	0	97,094	674670000	90	P00338;F5GYU2;F5GXY2;F5GXH2;F5H5J4;F5H6W8;F5GZQ4;F5H8H6;F5GXC7;F5GWW2;F5GXU1	P00338;F5GYU2;F5GXY2;F5GXH2	L-lactate dehydrogenase A chain	LDHA
49128000	82831000	94126000	136640000	183540000	107670000	149010000	157420000	137830000	194080000	174000000	141940000				154190000	21	21	17	25,2	25,2	22,3	122,2	0	266,24	1619400000	323	P00450;E9PFZ2;H7C5R1;D6RE86;H7C5N5	P00450;E9PFZ2;H7C5R1	Ceruloplasmin	CP
0	0	0	0	1663900	0	0	0	0	0	0	0				0	2	2	2	6,9	6,9	6,9	32,118	0	11,998	10652000	3	P00491;G3V393;G3V5M2	P00491;G3V393;G3V5M2	Purine nucleoside phosphorylase	PNP
67700000	100690000	67767000	51880000	63076000	57452000	30146000	28311000	53602000	32529000	37609000	18167000				1871100	15	15	15	51,6	51,6	51,6	44,614	0	248,14	1005400000	135	P00558;P07205	P00558	Phosphoglycerate kinase 1	PGK1
4402599936	6416600064	7153299968	9720099840	10078999552	8334900224	7520799744	8669599744	9998100480	10698999808	9683600384	8707900416				11454000000	25	25	1	59,1	59,1	3,2	45,205	0	323,31	119340000000	881	P00738;A0A0C4DGL8;J3QR68;H0Y300;J3QLC9;H3BS21;J3KTC3;J3KRH2;J3KSV1;J3QQI8;H3BMJ7	P00738;A0A0C4DGL8;J3QR68;H0Y300;J3QLC9;H3BS21	Haptoglobin;Haptoglobin alpha chain;Haptoglobin beta chain	HP
0	12509000	9602300	9766100	18200000	23895000	11696000	16297000	11088000	17618000	9498600	17284000				14791000	15	3	3	40,2	14,4	14,4	39,029	0	30,192	175740000	36	P00739;A0A0A0MRD9	P00739;A0A0A0MRD9	Haptoglobin-related protein	HPR
50537000	69056000	55565000	121680000	94694000	133140000	65609000	64601000	68643000	58265000	60305000	206570000				44065000	16	16	1	45	45	3,8	46,736	0	323,31	1305000000	194	P01009	P01009	Alpha-1-antitrypsin;Short peptide from AAT	SERPINA1
5843900	3276500	4851900	5501400	8979500	18154000	7425700	7379900	6809100	8456400	6409600	7553600				5451700	5	5	5	15,6	15,6	15,6	47,65	0	108,92	120320000	19	P01011;G3V3A0;G3V595	P01011;G3V3A0	Alpha-1-antichymotrypsin;Alpha-1-antichymotrypsin His-Pro-less	SERPINA3
0	934610	747480	2353700	1144600	2914000	2933800	3199400	1891400	3842500	3949700	2469200				2913600	3	3	3	8,7	8,7	8,7	53,154	0	29,554	28298000	30	P01019	P01019	Angiotensinogen;Angiotensin-1;Angiotensin-2;Angiotensin-3;Angiotensin-4;Angiotensin 1-9;Angiotensin 1-7;Angiotensin 1-5;Angiotensin 1-4	AGT
0	0	94580	0	0	0	0	0	0	0	0	0				0	7	1	1	4,7	0,8	0,8	163,29	0	7,3514	287860	2	P01023	P01023	Alpha-2-macroglobulin	A2M
0	0	0	0	0	0	0	0	0	0	0	0				0	6	3	3	4	2,8	2,8	187,15	0	19,017	5215800	3	P01024	P01024	Complement C3;Complement C3 beta chain;C3-beta-c;Complement C3 alpha chain;C3a anaphylatoxin;Acylation stimulating protein;Complement C3b alpha chain;Complement C3c alpha chain fragment 1;Complement C3dg fragment;Complement C3g fragment;Complement C3d fragment;Complement C3f fragment;Complement C3c alpha chain fragment 2	C3
21987000	6622700	4632800	12187000	12007000	14480000	15495000	22168000	9166300	19403000	17665000	18342000				16287000	5	5	5	10,1	10,1	10,1	71,957	0	63,977	221710000	42	P01042	P01042	Kininogen-1;Kininogen-1 heavy chain;T-kinin;Bradykinin;Lysyl-bradykinin;Kininogen-1 light chain;Low molecular weight growth-promoting factor	KNG1
89381000	112740000	105080000	92320000	164670000	223500000	134800000	180250000	231410000	242530000	165810000	185230000				164010000	6	6	6	79,4	79,4	79,4	11,765	0	323,31	2156200000	201	P01834	P01834	Ig kappa chain C region	IGKC
0	0	0	0	0	0	0	0	0	0	0	0				0	2	2	2	1,4	1,4	1,4	138,94	0	16,733	42747000	5	P02452	P02452	Collagen alpha-1(I) chain	COL1A1
0	0	0	0	0	0	25024000	24964000	9747500	13918000	10482000	11247000				0	3	3	3	2,6	2,6	2,6	141,78	0	28,154	81051000	8	P02458	P02458	Collagen alpha-1(II) chain;Collagen alpha-1(II) chain;Chondrocalcin	COL2A1
2388600	2546500	2163400	4643800	4161600	2340700	24640000	26153000	13009000	6732800	0	4538600				3861500	8	7	7	36,3	30,3	30,3	30,777	0	48,263	137920000	28	P02647;F8W696	P02647;F8W696	Apolipoprotein A-I;Proapolipoprotein A-I;Truncated apolipoprotein A-I	APOA1
10304000	26848000	18668000	131360000	116780000	68249000	241580000	212590000	270670016	141400000	99512000	117120000				0	14	14	14	49,2	49,2	49,2	36,154	0	323,31	1432800000	212	P02649;H0Y7L5;E9PEV4;E7ERP7;CON__Q03247	P02649;H0Y7L5	Apolipoprotein E	APOE
0	0	0	0	0	0	0	0	27479000	0	0	0				0	1	1	1	19,2	19,2	19,2	5,8767	0	36,604	590180000	20	V9GYE3;V9GYG9;V9GYM3;P02652	V9GYE3;V9GYG9;V9GYM3;P02652	Apolipoprotein A-II;Proapolipoprotein A-II;Truncated apolipoprotein A-II	APOA2
69377000	10462000	12484000	23060000	17457000	68293000	26244000	20341000	20196000	22563000	11181000	17069000				15226000	7	7	6	30,4	30,4	27,8	38,298	0	54,561	631910000	71	P02749;J3QRN2;J3QLI0;J3KS17	P02749;J3QRN2	Beta-2-glycoprotein 1	APOH
76831000	81578000	61777000	155810000	122400000	74070000	216830000	288790016	203490000	295200000	306340000	326220000				274920000	12	12	12	49,6	49,6	49,6	38,177	0	135,22	2546700000	207	P02750	P02750	Leucine-rich alpha-2-glycoprotein	LRG1
35941000	86355000	43135000	629009984	559609984	192130000	1175200000	1106400000	1140300032	1077200000	686830016	809790016				0	50	50	50	33,9	33,9	33,9	262,62	0	323,31	6285800000	759	P02751;H0Y7Z1;H0Y4K8	P02751;H0Y7Z1	Fibronectin;Anastellin;Ugl-Y1;Ugl-Y2;Ugl-Y3	FN1
18844000	0	0	0	0	11630000	2225400	1983700	0	0	0	1459200				2086900	4	4	4	24,6	24,6	24,6	22,974	0	43,931	116150000	16	Q5VY30;P02753	Q5VY30;P02753	Retinol-binding protein 4;Plasma retinol-binding protein(1-182);Plasma retinol-binding protein(1-181);Plasma retinol-binding protein(1-179);Plasma retinol-binding protein(1-176)	RBP4
19932000	25076000	48145000	39977000	69554000	79687000	71081000	95527000	95337000	104900000	109550000	96431000				100180000	5	5	5	21,6	21,6	21,6	38,999	0	119,65	932270000	122	P02760;S4R3Y4;S4R471	P02760;S4R3Y4;S4R471	Protein AMBP;Alpha-1-microglobulin;Inter-alpha-trypsin inhibitor light chain;Trypstatin	AMBP
114300000	111520000	94132000	124610000	144410000	358129984	606169984	688049984	620889984	585400000	564790016	634179968				578030000	9	9	7	41,3	41,3	32,8	23,511	0	177,15	4545600000	289	P02763	P02763	Alpha-1-acid glycoprotein 1	ORM1
281200000	132740000	156760000	290020000	304830016	445230016	245660000	287680000	301710016	346110016	262080000	326510016				234940000	8	5	5	20,2	14,7	14,7	39,324	0	108,39	4705200000	210	P02765;C9JV77	P02765;C9JV77	Alpha-2-HS-glycoprotein;Alpha-2-HS-glycoprotein chain A;Alpha-2-HS-glycoprotein chain B	AHSG
161980000	66199000	107900000	173170000	127340000	576310016	206780000	206120000	98026000	208680000	182330000	156250000				115730000	9	9	9	69,4	69,4	69,4	15,887	0	172,68	3178800000	278	P02766;A0A087WT59;A0A087WV45	P02766;A0A087WT59;A0A087WV45	Transthyretin	TTR
18797000704	3885199872	5777099776	5647900160	7383300096	15367000064	9999299584	11509000192	13470000128	16481000448	11189000192	11765000192				11690000000	64	64	62	77,7	77,7	76,9	77,063	0	323,31	182770000000	2306	P02787;H7C5E8;C9JVG0;F8WCI6;C9JB55;F8WEK9;F8WC57	P02787	Serotransferrin	TF
2265600000	986729984	990809984	1435399936	1788499968	2248100096	1960099968	2310599936	2025799936	2638000128	2189900032	2196300032				1846500000	20	20	20	59,3	59,3	59,3	51,676	0	323,31	30685000000	505	P02790;Q9BS19	P02790	Hemopexin	HPX
0	0	0	0	0	0	0	0	0	0	0	0				0	2	2	2	24,5	24,5	24,5	11,139	0	14,476	87390000	4	P04080;A0A1W2PS52	P04080;A0A1W2PS52	Cystatin-B	CSTB
0	0	0	0	0	0	0	0	0	0	0	0				0	3	3	3	13	13	13	38,714	0	19,001	7153100	3	P04083;Q5T3N1;Q5T3N0	P04083;Q5T3N1	Annexin A1;Annexin	ANXA1
0	5317400	2874500	0	0	0	753960	1105200	0	2347200	2562200	13728000				0	10	10	8	2,7	2,7	2,1	515,6	0	62,813	20093000	23	P04114;A8MUN2	P04114	Apolipoprotein B-100;Apolipoprotein B-48	APOB
327260000	264360000	279449984	460329984	498340000	401209984	705769984	776739968	576680000	1000899968	884339968	720729984				722710000	14	14	13	46,5	46,5	45,1	54,253	0	240,93	7770100000	365	P04217;M0R009	P04217;M0R009	Alpha-1B-glycoprotein	A1BG
2085400	3231500	6204600	8793500	20407000	3716900	3729100	1768800	3952700	4609800	36477000	43009000				41873000	33	25	0	55,1	43,8	0	60,066	0	323,31	3237600000	81	P04259	P04259	Keratin, type II cytoskeletal 6B	KRT6B
666419968	969139968	1721200000	2083500032	1234400000	1035500032	2313100032	1337699968	1055500032	899009984	2503399936	2590599936			+	5519100000	38	38	28	58,5	58,5	47,5	66,038	0	323,31	22612000000	1050	P04264;CON__P04264;CON__H-INV:HIT000016045	P04264;CON__P04264	Keratin, type II cytoskeletal 1	KRT1
170030000	212350000	174870000	172380000	242630000	154210000	46908000	64972000	79268000	47506000	75473000	55018000				9564100	14	14	14	61,5	61,5	61,5	36,053	0	318,27	2557800000	166	P04406;E7EUT5;O14556	P04406;E7EUT5	Glyceraldehyde-3-phosphate dehydrogenase	GAPDH
0	0	0	0	0	0	0	0	0	0	0	803650				0	4	4	4	36,1	36,1	36,1	22,782	0	51,344	62046000	5	P04792;F8WE04;C9J3N8	P04792;F8WE04	Heat shock protein beta-1	HSPB1
0	1898900	0	2316600	1878300	2011600	20217000	2088400	0	0	0	0				0	6	6	6	52,7	52,7	52,7	10,834	0	40,855	525890000	15	P05109	P05109	Protein S100-A8;Protein S100-A8, N-terminally processed	S100A8
27657000	50784000	65103000	78970000	102220000	80834000	83110000	95770000	98306000	93275000	99490000	81282000				78568000	11	11	11	31	31	31	45,674	0	323,31	1038800000	279	P05154;G3V5Q9;G3V264;G3V2M1;G3V482;G3V265;G3V5I3;G3V4B4;G3V3F5	P05154;G3V5Q9	Plasma serine protease inhibitor	SERPINA5
780560000	301560000	503689984	679760000	686809984	1064099968	1341500032	1610800000	1378400000	1498599936	1257100032	1038400000				1316100000	16	16	15	29	29	27,6	55,154	0	323,31	15288000000	543	P05155;E9PGN7;H9KV48;H0YCA1	P05155;E9PGN7;H9KV48	Plasma protease C1 inhibitor	SERPING1
0	34596000	52319000	23807000	15597000	0	0	0	0	0	0	0				0	2	2	2	15,7	15,7	15,7	10,17	0	45,147	101860000	12	S4R3A2;S4R371;P05413	S4R3A2;S4R371;P05413	Fatty acid-binding protein, heart	FABP3
1214700	0	0	0	0	0	0	0	0	0	0	0				0	2	2	2	6,6	6,6	6,6	46,836	0	14,887	10672000	4	P05455;E9PFL9;E7ERC4	P05455;E9PFL9;E7ERC4	Lupus La protein	SSB
42588000	110650000	24315000	20761000	14115000	15857000	36402000	32264000	21462000	72439000	46840000	45256000				18254000	10	10	3	17	17	6	85,696	0	155,05	497290000	49	P06396;A0A0A0MS51;A0A0A0MT01	P06396;A0A0A0MS51;A0A0A0MT01	Gelsolin	GSN
0	0	0	0	0	1994200	5747400	0	0	0	0	0				0	6	6	6	56,1	56,1	56,1	13,242	0	78,82	935860000	20	P06702	P06702	Protein S100-A9	S100A9
0	0	0	0	0	0	1721700	1951700	0	4423500	3187500	25490000				0	5	5	4	15,9	15,9	12,9	45,398	0	48,1	26690000	11	P06727	P06727	Apolipoprotein A-IV	APOA4
171450000	367480000	259600000	164720000	289830016	262750000	147500000	130960000	216170000	102210000	123630000	98948000				779330	18	18	18	60,8	60,8	60,8	47,168	0	323,31	3208100000	355	P06733;K7EM90;P13929;P09104;E5RI09;E5RG95;K7EPM1;K7EKN2;E5RGZ4;F5H0C8;F5H1C3	P06733;K7EM90	Alpha-enolase;Enolase	ENO1
26753000	5741900	7138200	4474200	4337800	3327300	0	1440400	2098300	0	1995000	0				0	4	4	4	22,1	22,1	22,1	32,575	0	32,556	192070000	18	P06748;E5RI98	P06748;E5RI98	Nucleophosmin	NPM1
0	1356600	0	23111000	45547000	16507000	8501100	5533200	17004000	1724500	2076300	1817000				0	8	8	8	24,9	24,9	24,9	44,002	0	59,756	98168000	32	P07093;C9JN98	P07093;C9JN98	Glia-derived nexin	SERPINE2
92359000	133990000	109770000	117060000	160800000	84952000	31613000	40144000	66472000	29099000	31301000	17684000				0	12	12	11	39,5	39,5	35,9	36,638	0	161,58	1447800000	163	P07195;A8MW50;C9J7H8;F5H793;F5H5G7;F5H155;G3XAP5;F5H245;P07864	P07195;A8MW50;C9J7H8	L-lactate dehydrogenase B chain;L-lactate dehydrogenase	LDHB
2361900	3463700	3641800	3185800	3461600	3155300	2173100	893110	1399200	0	1022500	968400				1772300	9	9	9	32,2	32,2	32,2	38,604	0	160,36	228130000	21	P07355;H0YN42;A6NMY6;H0YKS4;H0YMD0;H0YMU9;H0YMM1;H0YKZ7;H0YLV6;H0YMT9;H0YKX9;H0YMW4;H0YM50;H0YKL9;H0YNP5;H0YMD9;H0YKV8;H0YN28;H0YL33;H0YNB8;H0YN52;H0YKN4;H0YNA0;H0YLE2	P07355;H0YN42;A6NMY6;H0YKS4;H0YMD0;H0YMU9;H0YMM1;H0YKZ7;H0YLV6;H0YMT9;H0YKX9;H0YMW4;H0YM50	Annexin A2;Annexin;Putative annexin A2-like protein	ANXA2;ANXA2P2
5552900	31670000	8218000	16424000	5255200	17360000	1649400	1869200	1337900	0	0	1528300				0	12	12	2	39,2	39,2	6,3	47,766	0	115,89	236220000	68	Q5JP53;P07437;Q5ST81;P04350;A0A0B4J269;Q13509;K7ESM5;Q9BUF5;G3V2A3;A0A075B736;Q5SQY0;Q3ZCM7;A6NNZ2;M0R1I1;G3V5W4;M0QY85;G3V2R8;M0R042;G3V3R4;M0R2D3;M0QZL7;M0QYM7;G3V2N6;M0R278;CON__ENSEMBL:ENSBTAP00000025008;Q9H4B7	Q5JP53;P07437;Q5ST81;P04350;A0A0B4J269;Q13509	Tubulin beta chain;Tubulin beta-4A chain;Tubulin beta-3 chain	TUBB;TUBB4A;TUBB3
57990000	1174800	861830	1275700	1171800	1643200	794390	0	0	0	0	0				0	6	6	6	55,7	55,7	55,7	15,054	0	55,248	273700000	19	P07737;K7EJ44;I3L3D5;CON__P02584	P07737;K7EJ44;I3L3D5	Profilin-1	PFN1
67652000	123430000	20594000	36926000	70388000	40842000	14395000	12704000	19172000	8726100	8034600	3621200				0	23	12	12	35,7	19,1	19,1	84,659	0	300,54	814500000	106	P07900;G3V2J8;Q14568;Q58FF6;Q58FG0;Q58FG1	P07900	Heat shock protein HSP 90-alpha	HSP90AA1
0	0	0	0	0	2684900	0	0	0	0	0	0				0	1	1	1	3,2	3,2	3,2	45,14	0	28,986	8087000	2	P08185	P08185	Corticosteroid-binding globulin	SERPINA6
364640000	445580000	92933000	123340000	267700000	229460000	57573000	61073000	78166000	27108000	31666000	15914000				0	29	29	13	43,8	43,8	21,4	83,263	0	323,31	4426400000	282	P08238;Q58FF7;F8W026;Q96GW1;A0A1W2PRR1	P08238	Heat shock protein HSP 90-beta	HSP90AB1
0	0	0	0	0	0	0	2355400	0	0	0	0				0	2	2	2	1,3	1,3	1,3	167,55	0	11,859	9738400	2	P08572	P08572	Collagen alpha-2(IV) chain;Canstatin	COL4A2
1340200	2950000	1522600	3691500	1914700	4834000	658890	972870	1418900	0	1073700	0				0	5	5	5	17,8	17,8	17,8	35,936	0	31,987	30504000	13	P08758;D6RBL5;D6RBE9;E9PHT9	P08758;D6RBL5;D6RBE9	Annexin A5;Annexin	ANXA5
21633000	20203000	22847000	9256000	17897000	65449000	23332000	19805000	27960000	12916000	12140000	10384000				0	6	6	6	43,3	43,3	43,3	23,356	0	323,31	438400000	63	P09211;A8MX94;A0A087X243;A0A087X2E9	P09211;A8MX94	Glutathione S-transferase P	GSTP1
4847400	8538400	2625000	1865600	3297100	0	1249500	1286600	2340400	0	2589900	1670700				0	3	2	2	12,6	10,7	10,7	39,455	0	52,106	50622000	6	P09972;K7EKH5;J3KSV6;J3QKP5;A8MVZ9;C9J8F3	P09972;K7EKH5;J3KSV6;J3QKP5;A8MVZ9	Fructose-bisphosphate aldolase C;Fructose-bisphosphate aldolase	ALDOC
0	0	0	0	0	0	0	0	0	0	0	0				0	1	1	1	12,4	12,4	12,4	11,737	0,0028986	6,8526	6652200	1	P10599	P10599	Thioredoxin	TXN
0	0	0	0	0	0	17604000	16491000	20049000	13052000	9299800	11403000				0	5	5	5	15,3	15,3	15,3	40,165	0	46,827	64863000	21	P10915;D6RBS1;D6RC59;D6RAK7;D6RBX9;D6RFI7;D6RG04	P10915	Hyaluronan and proteoglycan link protein 1	HAPLN1
0	0	0	0	0	0	0	0	0	0	0	0				0	1	1	1	2,6	2,6	2,6	72,332	0	7,3235	4752700	1	P11021	P11021	78 kDa glucose-regulated protein	HSPA5
0	0	0	1761700	0	0	0	0	0	0	0	0				0	1	1	1	4,3	4,3	4,3	39,724	0	8,0432	10631000	2	P11766	P11766	Alcohol dehydrogenase class-3	ADH5
2256300	10550000	10909000	4737200	9011600	4014500	1246100	1391900	1830400	0	0	0				0	2	2	2	10	10	10	28,768	0	31,263	66900000	19	P12004	P12004	Proliferating cell nuclear antigen	PCNA
17396	0	0	0	0	0	0	0	0	0	0	0				0	1	1	1	0,8	0,8	0,8	267,29	0,0054645	6,5468	73445	1	P12270	P12270	Nucleoprotein TPR	TPR
1277700	1238200	951780	862030	830180	1115400	972360	0	885610	0	0	0				0	2	2	2	6	6	6	42,644	0	13,699	16805000	7	P12277;G3V461;G3V4N7	P12277;G3V461;G3V4N7	Creatine kinase B-type	CKB
0	0	0	0	0	0	378700	0	0	0	0	0				0	1	1	1	2	2	2	54,548	0	8,1117	6097600	3	P12955	P12955	Xaa-Pro dipeptidase	PEPD
92137000	86285000	68221000	17255000	80655000	13125000	6809400	5933800	5949600	3144200	2289000	2356600				0	17	17	17	23,3	23,3	23,3	95,337	0	140,03	916790000	70	P13639;K7EJ74;K7EP67;Q15029	P13639	Elongation factor 2	EEF2
0	0	0	0	0	2247500	0	0	0	0	0	0				0	3	1	1	3,1	1,4	1,4	92,468	0,0079787	6,4323	23692000	10	P14625	P14625	Endoplasmin	HSP90B1
0	7314100	10892000	14446000	11235000	4339500	20382000	13851000	15497000	14143000	24329000	18327000				84039000	9	9	9	14,4	14,4	14,4	81,744	0	56,983	226520000	67	P14923;C9JTX4;C9J826;C9JK18;C9JKY1	P14923	Junction plakoglobin	JUP
0	0	0	0	0	4085900	0	0	0	0	0	0				0	2	2	2	5,1	5,1	5,1	35,853	0	10,904	38190000	2	P15121;E9PEF9;E9PCX2;C9JRZ8	P15121;E9PEF9;E9PCX2;C9JRZ8	Aldose reductase;Aldo-keto reductase family 1 member B15	AKR1B1;AKR1B15
2155900	2002400	1928600	2420000	1929900	1688800	3112500	2852500	1540800	1376700	3199400	3127900				14895000	11	11	11	5,2	5,2	5,2	331,77	0	142,4	84984000	23	P15924	P15924	Desmoplakin	DSP
0	0	0	0	0	0	0	0	1172700	0	0	0				0	2	1	1	6,5	3	3	40,244	0	9,2898	32611000	5	P48741;P17066;E9PN25;E9PPY6;E9PNE6;Q53FA3;A0A0G2JIW1;P34931;P0DMV9;P0DMV8	P48741;P17066;E9PN25;E9PPY6;E9PNE6;Q53FA3;A0A0G2JIW1;P34931;P0DMV9;P0DMV8	Putative heat shock 70 kDa protein 7;Heat shock 70 kDa protein 6;Heat shock 70 kDa protein 1-like;Heat shock 70 kDa protein 1B;Heat shock 70 kDa protein 1A	HSPA7;HSPA6;HSPA8;HSPA1L;HSPA1B;HSPA1A
0	0	0	0	0	1015200	0	0	0	0	0	0				0	2	2	2	8	8	8	46,247	0	22,308	11546000	3	P17174	P17174	Aspartate aminotransferase, cytoplasmic	GOT1
0	0	0	0	0	0	0	0	709970	0	0	0				0	1	1	1	7,1	7,1	7,1	34,814	0	7,5458	10763000	5	P18065	P18065	Insulin-like growth factor-binding protein 2	IGFBP2
46750000	67121000	76396000	35469000	55717000	7752900	2782500	3306200	5184400	1336300	4051300	0				0	18	18	18	22,2	22,2	22,2	123,8	0	174,55	622130000	90	P18206;A0A096LPE1	P18206	Vinculin	VCL
11194000	11938000	4550500	2473800	12846000	13183000	2269900	3439400	4550500	6097300	3420100	3724500				511700	4	4	4	21,3	21,3	21,3	28,804	0	28,91	92905000	19	P18669;P15259;Q8N0Y7	P18669;P15259	Phosphoglycerate mutase 1;Phosphoglycerate mutase 2	PGAM1;PGAM2
0	0	0	0	0	0	0	0	458980	0	0	0				0	2	2	2	2,4	2,4	2,4	108,33	0	12,665	3468500	6	P19021;H7BYD9	P19021;H7BYD9	Peptidyl-glycine alpha-amidating monooxygenase;Peptidylglycine alpha-hydroxylating monooxygenase;Peptidyl-alpha-hydroxyglycine alpha-amidating lyase	PAM
16876000	16481000	33054000	4459600	5704300	5159500	3293000	3200000	3162500	2434000	2129300	0				0	10	10	10	17	17	17	76,613	0	98,639	312600000	37	P19338;H7BY16	P19338;H7BY16	Nucleolin	NCL
37610000	25247000	21649000	23185000	21092000	72928000	125950000	194630000	188720000	167540000	160470000	149020000				182380000	7	5	5	39,8	31,3	31,3	23,602	0	45,588	1250700000	90	P19652	P19652	Alpha-1-acid glycoprotein 2	ORM2
60212000	144280000	208890000	19514000	25912000	15832000	1691500	5102800	9157500	0	4127000	0				0	28	28	26	16,5	16,5	15,7	276,55	0	236,17	756310000	70	Q5HY54;P21333;A0A087WWY3;Q60FE5;F8WE98;H0Y5C6	Q5HY54;P21333;A0A087WWY3;Q60FE5	Filamin-A	FLNA
1934200	4055300	2024600	2219900	3359000	0	0	0	797050	0	0	0				0	4	4	4	14,1	14,1	14,1	47,079	0	76,206	14310000	10	P22234;D6RF62;E9PBS1	P22234;D6RF62;E9PBS1	Multifunctional protein ADE2;Phosphoribosylaminoimidazole-succinocarboxamide synthase;Phosphoribosylaminoimidazole carboxylase	PAICS
15086000	23817000	22797000	6385200	16800000	3574700	3166700	2290900	3236800	2004000	3266900	2840200				0	11	11	11	16	16	16	117,85	0	202,81	176100000	69	P22314;Q5JRR6;Q5JRS1;Q5JRS3;Q5JRS2;Q5JRR9;Q5JRS0	P22314	Ubiquitin-like modifier-activating enzyme 1	UBA1
15368000	11671000	9459200	25924000	19226000	19818000	52450000	48660000	31117000	72160000	62472000	38649000				63458000	9	9	9	20,9	20,9	20,9	60,556	0	105,58	432720000	94	P22792	P22792	Carboxypeptidase N subunit 2	CPN2
0	0	0	0	0	4293500	10591000	13144000	5705500	0	0	0				0	6	6	1	12,7	12,7	3,3	77,213	0	59,136	89122000	17	P23142	P23142	Fibulin-1	FBLN1
0	0	2671800	0	0	0	0	0	0	0	0	0				0	1	1	1	1,6	1,6	1,6	76,149	0,0054496	6,5408	13830000	1	P23246	P23246	Splicing factor, proline- and glutamine-rich	SFPQ
23376000	46741000	27757000	21590000	22363000	6570400	3949600	4181500	4822300	1654300	1733900	1819100				0	7	7	7	18,1	18,1	18,1	47,716	0	51,315	279210000	36	P23526	P23526	Adenosylhomocysteinase	AHCY
227930000	198100000	167640000	237590000	209570000	344060000	616000000	885260032	786760000	640400000	662019968	658609984				780740000	15	15	15	53,7	53,7	53,7	34,258	0	237,21	5472000000	284	P25311;C9JEV0;H7BZJ8	P25311;C9JEV0	Zinc-alpha-2-glycoprotein	AZGP1
20437000	13576000	9195600	8746300	29793000	8439800	4901800	4320200	4485000	3269800	2341200	2455000				0	6	6	6	16,5	16,5	16,5	50,118	0	38,698	216010000	16	P26641	P26641	Elongation factor 1-gamma	EEF1G
0	0	0	0	0	0	0	0	0	0	0	0				0	3	3	3	26,8	26,8	26,8	16,891	0	71,756	58199000	6	P27482	P27482	Calmodulin-like protein 3	CALML3
4038600	0	2879300	0	0	0	0	0	0	0	0	0				0	3	3	3	17	17	17	25,035	0	19,102	43468000	9	P30041	P30041	Peroxiredoxin-6	PRDX6
0	0	0	0	0	1628500	0	0	0	0	0	0				0	2	2	2	6,9	6,9	6,9	56,782	0	13,344	2839000	3	P30101	P30101	Protein disulfide-isomerase A3	PDIA3
0	0	0	0	0	0	1740400	0	0	0	0	0				0	3	3	3	41,6	41,6	41,6	11,471	0	37,821	38443000	6	P31151;Q86SG5	P31151	Protein S100-A7	S100A7
0	0	0	0	0	0	0	0	0	0	0	0				0	2	1	1	13,7	9,7	9,7	27,774	0	7,1753	1234500	1	P31947	P31947	14-3-3 protein sigma	SFN
2967900	0	0	0	0	1287100	335760	0	484950	0	640340	557580				640300	4	3	3	18,7	13,1	13,1	21,892	0	20,676	30116000	14	P32119;A6NIW5	P32119;A6NIW5	Peroxiredoxin-2	PRDX2
0	0	0	0	0	0	0	0	12132000	0	0	0				0	1	1	1	2	2	2	67,93	0	19,265	101280000	19	P32455	P32455	Interferon-induced guanylate-binding protein 1	GBP1
0	0	0	0	0	0	0	0	0	0	0	0				0	2	2	1	3,6	3,6	1	81,307	0	11,931	2786200	2	P33993	P33993	DNA replication licensing factor MCM7	MCM7
7134900	17205000	19231000	6768700	11135000	4167100	5716600	3131600	2557100	5610900	1678800	2323800				0	9	9	9	14,9	14,9	14,9	94,33	0	162,13	118320000	43	P34932;A0A087WTS8;A0A087WYC1	P34932;A0A087WTS8;A0A087WYC1	Heat shock 70 kDa protein 4	HSPA4
122950000	282720000	393329984	513340000	325640000	369980000	659190016	398009984	276200000	261800000	944440000	886640000			+	2383800000	32	31	31	63,2	63,2	63,2	62,064	0	323,31	7195100000	664	P35527;CON__P35527;K7EQQ3	P35527;CON__P35527;K7EQQ3	Keratin, type I cytoskeletal 9	KRT9
1766600	0	0	0	0	0	0	0	0	0	0	0				0	3	3	3	2	2	2	226,53	0	18,517	27398000	2	P35579;A0A0C4DFM8;A1L2Z2;P35749;P35580;Q7Z406	P35579	Myosin-9	MYH9
231390000	244140000	516860000	968150016	338049984	247670000	591409984	473910016	276609984	328400000	571009984	556780032			+	1110900000	33	31	23	63,2	60,1	49,6	65,432	0	323,31	7521300000	595	P35908;CON__P35908;Q01546;CON__P07744;CON__Q01546;CON__Q9DCV7;CON__Q3KNV1;CON__P08729;CON__Q9R0H5;CON__Q9NSB2;CON__Q6ISB0;P08729;Q9NSB2;P12036;H0YHD9;F8VS61;CON__Q8N1N4-2;CON__Q7RTT2;Q8N1N4	P35908;CON__P35908	Keratin, type II cytoskeletal 2 epidermal	KRT2
0	0	0	1373300	1241200	2973600	3205000	2898100	1743000	26031000	23506000	16045000				927100	6	4	4	17,5	11,2	11,2	46,312	0	29,131	49984000	19	P36955;I3L4Z0;I3L2R7;I3L4N7	P36955;I3L4Z0	Pigment epithelium-derived factor	SERPINF1
0	0	0	0	0	0	0	0	0	0	0	0				0	1	1	1	6,4	6,4	6,4	21,086	0	10,411	4853900	1	X6RJP6;P37802	X6RJP6;P37802	Transgelin-2	TAGLN2
0	0	0	0	0	0	0	1600900	0	0	0	0				0	2	2	2	6,9	6,9	6,9	36,426	0	10,875	23667000	3	P40925;C9JLV6;C9JRL4;B8ZZ51;B9A041;C9JF79	P40925;C9JLV6;C9JRL4;B8ZZ51;B9A041;C9JF79	Malate dehydrogenase, cytoplasmic;Malate dehydrogenase	MDH1
1037300	0	0	0	0	0	0	0	5051700	0	4963800	0				0	2	2	2	4,2	4,2	4,2	61,132	0	12,421	33021000	5	P43251	P43251	Biotinidase	BTD
727900032	301249984	288609984	517540000	616140032	1366800000	1322300032	1096099968	1029800000	2342799872	1934700032	1197400064				1171500000	30	30	29	45,4	45,4	44,2	69,068	0	323,31	12799000000	495	P43652	P43652	Afamin	AFM
807210	0	0	0	0	0	0	0	0	0	0	0				0	1	1	1	13,8	13,8	13,8	14,114	0	16,916	4682900	4	Q5T7N0;P46777	Q5T7N0;P46777	60S ribosomal protein L5	RPL5
0	0	0	0	0	0	0	0	0	0	0	0				0	5	5	5	54,4	54,4	54,4	15,075	0	37,239	267370000	8	P47929	P47929	Galectin-7	LGALS7
0	0	0	0	0	0	0	0	0	0	0	0				0	2	2	2	3,2	3,2	3,2	101,89	0	10,753	9125800	2	P49736;H0Y8E6	P49736;H0Y8E6	DNA replication licensing factor MCM2	MCM2
12205000	21775000	18567000	12429000	24828000	11496000	4276000	5221600	6545600	3543000	4515900	3430600				0	9	9	9	23,1	23,1	23,1	50,663	0	81,64	178270000	44	P50395;Q5SX87;V9GYJ7;V9GYF8;Q5SX90;Q5SX86;Q5SX91;P31150	P50395;Q5SX87	Rab GDP dissociation inhibitor beta	GDI2
11241000	16039000	6334600	9407800	12702000	7781800	4970300	5819400	6912400	0	0	0				0	6	6	6	21	21	21	42,403	0	126,37	103330000	14	P50453;P50452;H7BXK7;C9J7N5;A0A1B0GU38;A0A0C4DGW9;P30740;O75830	P50453	Serpin B9	SERPINB9
8451400	12299000	15833000	12423000	11390000	10589000	0	0	0	0	0	0				0	5	5	5	14,8	14,8	14,8	46,44	0	33,882	148690000	17	P50454;E9PKH2;H0YEP8;E9PR70;E9PPV6;E9PQ34;E9PJH8;E9PIG2;E9PRS3;E9PNX1;E9PK86;E9PMI5	P50454;E9PKH2	Serpin H1	SERPINH1
1005700	0	0	0	0	0	2189000	2012500	0	0	0	0			+	0	2	2	2	7,7	7,7	7,7	38,429	0	17,411	20664000	14	P51884;CON__Q05443	P51884;CON__Q05443	Lumican	LUM
1517900	1713200	1435200	0	0	1545600	0	0	0	0	0	0				0	3	3	3	7,9	7,9	7,9	57,861	0	18,852	20502000	8	P52292;J3QLL0;J3KS65	P52292	Importin subunit alpha-1	KPNA2
0	0	0	0	0	440400	0	0	0	0	0	0				0	2	2	2	9,1	9,1	9,1	42,966	0	11,716	4918000	3	P54687;F5H2F2;A0A087WYF2	P54687;F5H2F2;A0A087WYF2	Branched-chain-amino-acid aminotransferase, cytosolic	BCAT1
2739900	0	2295500	0	2124600	0	0	0	1183300	0	0	0				0	4	4	4	6	6	6	110,42	0	26,161	30461000	10	P55060	P55060	Exportin-2	CSE1L
28353000	8760500	26634000	4934100	6148900	3844300	1280300	1733100	2169300	2056200	1426100	912770				0	16	16	16	29,4	29,4	29,4	89,321	0	191,21	293430000	54	P55072;C9JUP7;C9IZA5	P55072	Transitional endoplasmic reticulum ATPase	VCP
9105500	8920200	6796400	5143800	12812000	28971000	9335100	12919000	35259000	7927000	8470300	11146000				0	7	7	7	39,2	39,2	39,2	30,791	0	47,283	199190000	31	P60174;U3KQF3;U3KPZ0;U3KPS5	P60174	Triosephosphate isomerase	TPI1
306080000	686240000	698579968	445830016	490070016	244770000	122190000	166430000	229560000	54831000	44785000	31069000				7219200	16	16	7	54,9	54,9	30,9	41,792	0	295,51	6729900000	300	P63261;P60709;I3L3I0;I3L1U9;I3L4N8;G5E9R0;K7EM38;E7EVS6;I3L3R2;J3KT65;C9JUM1;C9JZR7;Q6S8J3;A5A3E0;P0CG38;Q9BYX7;P0CG39;F8WCH0	P63261;P60709;I3L3I0;I3L1U9;I3L4N8	Actin, cytoplasmic 2;Actin, cytoplasmic 2, N-terminally processed;Actin, cytoplasmic 1;Actin, cytoplasmic 1, N-terminally processed	ACTG1;ACTB
0	1521900	1492100	0	0	1099000	1093600	1179300	4245400	1031500	1174300	0				0	2	2	2	7,7	7,7	7,7	41,807	0	13,873	14725000	8	Q5T6W2;P61978	Q5T6W2;P61978	Heterogeneous nuclear ribonucleoprotein K	HNRNPK
0	9798800	4127800	2235500	0	1458300	0	0	0	0	0	0				0	2	2	2	14,9	14,9	14,9	21,879	0	86,551	32299000	6	Q5JR95;P62241	Q5JR95;P62241	40S ribosomal protein S8	RPS8
5135400	7358900	5328100	2214000	6412300	13593000	4759600	6026000	12984000	3900100	5385500	3568800				0	7	6	6	34,9	31	31	29,174	0	46,091	74499000	31	P62258;K7EM20;B4DJF2;I3L3T1;K7EIT4;I3L0W5	P62258	14-3-3 protein epsilon	YWHAE
0	0	0	0	0	0	0	0	0	0	0	0				0	1	1	1	8,6	8,6	8,6	16,273	0	7,1295	9749700	4	P62263	P62263	40S ribosomal protein S14	RPS14
0	0	0	0	0	0	0	0	0	0	0	0				0	1	1	1	7,7	7,7	7,7	15,807	0	14,518	4839300	2	P62266	P62266	40S ribosomal protein S23	RPS23
8394800	10561000	7375100	4173000	7451000	6046000	0	0	0	0	0	0				0	6	6	6	21,3	21,3	21,3	29,597	0	37,92	98558000	25	P62701;C9JEH7;Q8TD47;P22090	P62701	40S ribosomal protein S4, X isoform	RPS4X
10090000	347609984	469120000	223560000	78642000	1450800	1448500	1583100	2238400	2488300	2575600	2070400				6922800	5	5	5	47,6	47,6	47,6	11,367	0	65,922	1125000000	32	P62805	P62805	Histone H4	HIST1H4A
3873100	0	0	0	0	0	0	0	0	0	0	0				0	3	3	3	16,1	16,1	16,1	24,831	0	18,382	43176000	6	P62906	P62906	60S ribosomal protein L10a	RPL10A
3268000	0	0	0	0	0	0	0	0	0	0	0				0	2	2	2	12,9	12,9	12,9	20,252	0	12,821	27812000	6	P62913;Q5VVC9;Q5VVC8	P62913;Q5VVC9;Q5VVC8	60S ribosomal protein L11	RPL11
11682000	957680	1251900	1460000	1864600	1334900	1344000	0	0	0	0	0				0	7	7	7	46,7	46,7	46,7	18,012	0	48,712	146230000	15	P62937;F8WE65;C9J5S7;E5RIZ5;Q9Y536	P62937;F8WE65;C9J5S7	Peptidyl-prolyl cis-trans isomerase A;Peptidyl-prolyl cis-trans isomerase A, N-terminally processed;Peptidyl-prolyl cis-trans isomerase	PPIA
11102000	11525000	9571400	4440300	11207000	27135000	10626000	18006000	26505000	9769300	11242000	8550600				0	9	9	8	46,9	46,9	42,9	27,745	0	135,18	277910000	99	P63104;E7EX29;B0AZS6;B7Z2E6;H0YB80;E7ESK7;E5RGE1;E5RIR4;E9PD24;E7EVZ2;P27348;P31946;Q04917;P61981	P63104;E7EX29;B0AZS6;B7Z2E6;H0YB80	14-3-3 protein zeta/delta	YWHAZ
0	0	0	0	0	0	0	0	0	6433200	0	0				0	11	2	2	30,8	6,9	6,9	42,051	0	13,544	126000000	15	P68133;P68032;P63267;P62736;A6NL76;C9JFL5;F6UVQ4;F6QUT6;C9JTX5;F8WB63;B8ZZJ2	P68133;P68032;P63267;P62736;A6NL76;C9JFL5;F6UVQ4;F6QUT6	Actin, alpha skeletal muscle;Actin, alpha cardiac muscle 1;Actin, gamma-enteric smooth muscle;Actin, aortic smooth muscle	ACTA1;ACTC1;ACTG2;ACTA2
91328000	164040000	122700000	108490000	159620000	82360000	31358000	40418000	46894000	12171000	12859000	10024000				0	9	9	9	26,2	26,2	26,2	50,184	0	115,51	1646100000	138	Q5VTE0;P68104;A0A087WVQ9;A0A087WV01;Q05639;A6PW80;Q5JR01	Q5VTE0;P68104;A0A087WVQ9;A0A087WV01;Q05639	Putative elongation factor 1-alpha-like 3;Elongation factor 1-alpha 1;Elongation factor 1-alpha;Elongation factor 1-alpha 2	EEF1A1P5;EEF1A1;EEF1A2
0	0	0	0	0	474430	0	0	0	0	0	0				0	10	1	0	31,9	3,8	0	49,83	0	7,7432	3091100	1	P68371	P68371	Tubulin beta-4B chain	TUBB4B
23790000	21742000	27903000	33887000	38608000	67132000	48181000	54732000	45544000	53883000	43177000	42763000				30855000	7	7	6	61,9	61,9	55,1	15,998	0	74,13	752170000	92	P68871;F8W6P5;P02042;A0A0J9YWK4	P68871;F8W6P5	Hemoglobin subunit beta;LVV-hemorphin-7;Spinorphin	HBB
12609000	25537000	38327000	24886000	0	34766000	38417000	34741000	25042000	36749000	19200000	16057000				9159800	6	6	4	57,7	57,7	40,1	15,257	0	40,568	416640000	39	P69905;G3V1N2	P69905;G3V1N2	Hemoglobin subunit alpha	HBA1;HBA2
2898000	2762100	3799400	5882200	7354400	3799200	9699500	12242000	5740700	13252000	8635900	5440100				10779000	5	5	5	7,7	7,7	7,7	92,335	0	32,973	89578000	36	P80108	P80108	Phosphatidylinositol-glycan-specific phospholipase D	GPLD1
0	0	9793100	0	0	6317000	0	0	0	0	0	0				9483400	2	2	2	20	20	20	11,284	0	14,627	50893000	15	P81605	P81605	Dermcidin;Survival-promoting peptide;DCD-1	DCD
0	0	0	0	0	913140	1741900	2915000	1703100	1081600	1212600	1106900				0	2	2	2	3,2	3,2	3,2	126,57	0	15,985	9386900	6	P98095	P98095	Fibulin-2	FBLN2
0	0	0	0	0	0	4436800	5430300	2443800	80297000	76392000	43653000				0	16	16	16	6,1	6,1	6,1	468,83	0	106,17	99287000	50	P98160;A0A0U1RQT3	P98160	Basement membrane-specific heparan sulfate proteoglycan core protein;Endorepellin;LG3 peptide	HSPG2
0	0	0	0	0	0	0	0	1477900	0	0	0				0	1	1	1	3	3	3	38,725	0,0080645	6,4714	5788200	0	Q01664	Q01664	Transcription factor AP-4	TFAP4
0	0	0	0	0	0	0	0	0	0	0	0				6871800	3	3	3	5,1	5,1	5,1	113,75	0	22,302	23164000	6	Q02413	Q02413	Desmoglein-1	DSG1
35628000	86396000	95356000	36131000	36517000	82193000	4280400	2348000	0	0	0	0				0	8	8	7	44,2	44,2	38,7	22,11	0	55,657	731230000	71	Q06830;A0A0A0MSI0;A0A0A0MRQ5;H7C3T4;Q13162	Q06830;A0A0A0MSI0;A0A0A0MRQ5	Peroxiredoxin-1	PRDX1
0	0	0	0	0	0	0	3813600	0	0	0	0				0	1	1	1	1,7	1,7	1,7	99,986	0	7,1521	19617000	3	Q08554	Q08554	Desmocollin-1	DSC1
0	3510300	5601500	14841000	16613000	8025400	40733000	45039000	20509000	15612000	37560000	17099000				0	4	4	4	12,7	12,7	12,7	34,985	0	50,503	185840000	27	Q12841;C9J5G4	Q12841	Follistatin-related protein 1	FSTL1
0	0	0	0	0	0	0	0	0	0	0	0				0	2	2	2	2,9	2,9	2,9	88,549	0	13,906	7067700	3	Q13263;M0R3C0;M0R0K9	Q13263;M0R3C0;M0R0K9	Transcription intermediary factor 1-beta	TRIM28
0	0	0	0	0	3086600	0	0	0	0	0	0				0	10	1	1	32,6	2	2	49,953	0	8,3101	6982000	3	Q9BVA1;Q13885	Q9BVA1;Q13885	Tubulin beta-2B chain;Tubulin beta-2A chain	TUBB2B;TUBB2A
0	0	0	0	0	0	8182600	10905000	2195300	4339100	5598400	4256800				0	4	4	3	5	5	4,3	151,25	0	109,69	28886000	13	Q14112;A0A087WZP6;H0YJV3	Q14112;A0A087WZP6;H0YJV3	Nidogen-2	NID2
479430	0	0	499830	636400	980460	3076500	2348700	1233200	1129900	1034700	748150				0	3	3	3	3,6	3,6	3,6	122,29	0	18,376	16474000	6	Q14126;J3KSI6	Q14126;J3KSI6	Desmoglein-2	DSG2
5709700	5142400	13779000	2773900	3756500	3586800	0	0	3644600	3482900	2315500	3080800				0	9	7	6	4,4	3,7	3,1	291,02	0	51,855	72351000	16	Q14315	Q14315	Filamin-C	FLNC
6974200	6445800	4880900	4262900	4194200	2006100	0	1623200	1606400	0	1216100	705330				0	8	8	8	13,1	13,1	13,1	97,169	0	208,34	81141000	44	Q14974;J3KTM9;J3QR48;J3QRG4	Q14974;J3KTM9	Importin subunit beta-1	KPNB1
0	0	0	0	0	0	0	0	241080	0	0	0				0	1	1	1	3,2	3,2	3,2	48,121	0,0028169	6,7184	1981600	1	Q15084	Q15084	Protein disulfide-isomerase A6	PDIA6
0	0	0	0	0	0	0	0	976370	0	0	0				0	1	1	1	3,7	3,7	3,7	37,497	0,0028818	6,8061	2300900	2	Q15365	Q15365	Poly(rC)-binding protein 1	PCBP1
1535700	0	0	0	0	0	0	0	0	0	0	0				0	2	2	2	2,5	2,5	2,5	135,58	0	14,095	21916000	3	Q15393	Q15393	Splicing factor 3B subunit 3	SF3B3
0	0	0	0	0	0	0	0	0	0	0	0				0	4	4	4	41,6	41,6	41,6	16,511	0	34,57	121040000	4	Q15828	Q15828	Cystatin-M	CST6
0	0	0	0	0	13250000	0	1364500	0	0	0	0				0	2	2	2	5,3	5,3	5,3	54,529	0	15,609	35635000	5	Q16658;C9JPH9;C9JFC0;A0A0A0MSB2	Q16658;C9JPH9;C9JFC0;A0A0A0MSB2	Fascin	FSCN1
0	0	0	0	0	0	0	10883000	0	0	0	0				0	2	2	2	1,7	1,7	1,7	189,97	0	12,143	63175000	2	Q2KHR3;H0YCQ7	Q2KHR3;H0YCQ7	Glutamine and serine-rich protein 1	QSER1
0	0	0	0	0	0	30549000	0	0	0	0	0				0	4	1	1	14,1	4,8	4,8	42,003	0	8,2554	549990000	11	Q562R1	Q562R1	Beta-actin-like protein 2	ACTBL2
14172000	8962000	2661600	2838800	3536700	3384600	0	0	0	0	0	0				0	8	1	1	20,2	3,9	3,9	44,348	0	7,5055	108260000	25	Q58FF8	Q58FF8	Putative heat shock protein HSP 90-beta 2	HSP90AB2P
0	0	0	0	0	0	0	0	108600000	0	0	0				0	1	1	1	3,2	3,2	3,2	38,318	0	7,3395	1919200000	63	Q5STZ8;Q8NE71	Q5STZ8;Q8NE71	ATP-binding cassette sub-family F member 1	ABCF1
3759600	2226700	3033700	6194300	7710700	3637100	10302000	9933400	8020300	12344000	9740000	4759500				10521000	4	4	4	7,9	7,9	7,9	71,712	0	37,389	92474000	51	Q6EMK4	Q6EMK4	Vasorin	VASN
0	398510	585840	1138800	0	0	873220	524220	498790	656260	770370	610200				1189000	2	2	2	15,3	15,3	15,3	60,54	0	12,834	7314700	12	Q6UWP8	Q6UWP8	Suprabasin	SBSN
0	0	0	0	0	0	0	1268800	0	0	0	0				0	1	1	1	2,3	2,3	2,3	59,582	0	7,2769	10518000	16	Q6UX71	Q6UX71	Plexin domain-containing protein 2	PLXDC2
3488600	2645100	2396300	2349000	1999100	0	0	0	0	0	0	0				0	7	7	7	7,8	7,8	7,8	136,37	0	43,169	37459000	15	Q86VP6;A0A0C4DGH5	Q86VP6;A0A0C4DGH5	Cullin-associated NEDD8-dissociated protein 1	CAND1
0	0	0	0	0	0	0	0	74987000	0	0	0	+			0	1	1	1	1,9	1,9	1,9	76,992	1	-2	490920000	5	Q8IUC4	Q8IUC4	Rhophilin-2	RHPN2
0	0	0	0	0	813740	0	0	0	0	0	0	+			0	1	1	1	3,3	3,3	3,3	73,944	1	-2	13310000	1	Q8NA70	Q8NA70	Protein FAM47B	FAM47B
0	0	0	0	0	0	0	0	1007400000	0	0	0				0	2	2	2	0,5	0,5	0,5	461,15	0	10,921	3035400000	2	Q8WXX0	Q8WXX0	Dynein heavy chain 7, axonemal	DNAH7
0	0	0	0	0	0	0	873540	971950	0	0	5574500				0	2	2	2	4	4	4	51,286	0	14,293	5683300	4	Q92743;H0Y7G9	Q92743;H0Y7G9	Serine protease HTRA1	HTRA1
0	3789700	3114900	4415200	3791600	7129200	9720100	13985000	6292700	5651600	6503400	5563100				7014200	4	4	4	17	17	17	35,964	0	27,665	60928000	17	Q92820	Q92820	Gamma-glutamyl hydrolase	GGH
38367000	25465000	26942000	56871000	53028000	37399000	57151000	69925000	46705000	72400000	73235000	70059000				48722000	6	6	6	16,7	16,7	16,7	62,216	0	62,368	700740000	90	Q96PD5;CON__ENSEMBL:ENSBTAP00000016285	Q96PD5	N-acetylmuramoyl-L-alanine amidase	PGLYRP2
0	0	0	0	0	0	0	0	684850	0	0	0	+			0	1	1	1	2,9	2,9	2,9	97,944	1	-2	1734500	0	Q9H3E2	Q9H3E2	Sorting nexin-25	SNX25
0	0	0	0	0	0	0	0	22269000	0	0	0	+			0	1	1	1	4	4	4	46,198	1	-2	236110000	1	Q9H497	Q9H497	Torsin-3A	TOR3A
0	0	0	0	0	0	0	166170000	0	0	0	0				0	2	2	2	1,3	1,3	1,3	215,31	0	12,12	747170000	3	Q9H7D0;H0Y7N4	Q9H7D0;H0Y7N4	Dedicator of cytokinesis protein 5	DOCK5
0	0	0	0	2498600	0	0	0	0	0	0	0	+			0	1	1	1	2,3	2,3	2,3	72,717	1	-2	4371700	0	Q9HBW1	Q9HBW1	Leucine-rich repeat-containing protein 4	LRRC4
0	0	0	0	5445400	3862000	4591400	4583800	6036700	7526200	6169400	6699000				6293500	3	3	3	7,6	7,6	7,6	53,498	0	27,374	60356000	22	Q9NZP8;H0YFL7;F5H2Z5;F5GWF3	Q9NZP8;H0YFL7	Complement C1r subcomponent-like protein	C1RL
0	0	0	0	0	0	0	0	0	0	0	0				0	2	2	2	20,5	20,5	20,5	15,892	0	29,966	23166000	5	Q9NZT1	Q9NZT1	Calmodulin-like protein 5	CALML5
10241000	31494000	13404000	6340800	17180000	3536900	2057900	0	3519200	0	0	2562400				0	8	8	8	15,3	15,3	15,3	56,084	0	57,843	161880000	27	Q9P258	Q9P258	Protein RCC2	RCC2
0	0	0	0	207450	0	0	0	0	0	0	0				0	1	1	1	1	1	1	134,46	0	7,3877	2353700	3	Q9P2J5	Q9P2J5	Leucine--tRNA ligase, cytoplasmic	LARS
0	0	0	0	0	0	0	0	1002000	0	0	0				0	1	1	1	4,5	4,5	4,5	38,256	0,0079156	6,4109	11948000	1	Q9P2W7	Q9P2W7	Galactosylgalactosylxylosylprotein 3-beta-glucuronosyltransferase 1	B3GAT1
0	0	0	1103699968	1044000000	0	0	0	977859968	104200000	484140000	345080000				450360000	1	1	1	3,9	3,9	3,9	34,49	0,0055402	6,6049	11006000000	35	Q9UBP9	Q9UBP9	PTB domain-containing engulfment adapter protein 1	GULP1
0	0	0	0	0	0	0	0	0	0	0	0				0	1	1	1	1,8	1,8	1,8	72,313	0,0080429	6,471	0	1	Q9UNQ0	Q9UNQ0	ATP-binding cassette sub-family G member 2	ABCG2
3670200	2578200	2406900	1957800	2303700	1540300	926030	0	1647900	0	0	0				0	2	2	2	6,1	6,1	6,1	43,786	0	14,511	33171000	6	Q9UQ80;F8VR77	Q9UQ80;F8VR77	Proliferation-associated protein 2G4	PA2G4
22057000	47748000	31613000	10367000	13911000	9422600	1760000	2240700	1965500	0	0	0				0	8	8	8	21,9	21,9	21,9	40,422	0	134,86	225990000	53	Q9Y617	Q9Y617	Phosphoserine aminotransferase	PSAT1
0	0	0	0	0	0	0	0	13776000	0	0	0		+		0	1	1	1	0	0	0	576,15	0,0081081	6,4853	67679000	9	REV__Q86UQ4;REV__A0A0A0MT16	REV__Q86UQ4;REV__A0A0A0MT16
0	0	0	0	0	0	0	0	0	477870	0	0		+		0	1	1	1	0	0	0	17,759	0,0029586	7,0657	12940000	1	REV__H0Y8N6;REV__H7BY98;REV__H7C2K9;REV__Q8IZX4;REV__P21675	REV__H0Y8N6;REV__H7BY98;REV__H7C2K9;REV__Q8IZX4;REV__P21675
0	0	0	0	0	0	0	0	0	0	52891000	0		+		0	1	1	1	0	0	0	86,84	0,0055866	6,6484	142170000	4	REV__H0YN02;REV__H0YLX4;REV__Q3MJ13;REV__H0YKE0	REV__H0YN02;REV__H0YLX4;REV__Q3MJ13;REV__H0YKE0
264670	0	0	0	0	0	0	0	0	0	0	0	+	+		0	1	1	1	0	0	0	124,15	1	-2	1117400	3	REV__Q6ZRK6	REV__Q6ZRK6

## Sheet: Planilha2
CMd1_1	CMd1_2	CMd1_3	CMd4_1	CMd4_2	CMd4_3	CMd8_1	CMd8_2	CMd8_3	CMd15_1	CMd15_2	CMd15_3	Only identified by site	Reverse	Potential contaminant	nCM	Peptides	Razor + unique peptides	Unique peptides	Sequence coverage [%]	Unique + razor sequence coverage [%]	Unique sequence coverage [%]	Mol. weight [kDa]	Q-value	Score	Intensity	MS/MS count	Protein IDs	Majority protein IDs	Protein names	Gene names
#!{Type}E	E	E	E	E	E	E	E	E	E	E	E	C	C	C	C	N	N	N	N	N	N	N	N	N	N	N	T	T	T	T
#!{C:CM/day}CMd1	CMd1	CMd1	CMd4	CMd4	CMd4	CMd8	CMd8	CMd8	CMd15	CMd15	CMd15
0	0	0	0	0	0	0	0	3444400	0	0	0				0	16	1	1	45	3,8	3,8	46,708	0	8,0253	28671000	1	A0A024R6I7;A0A0G2JRN3;G3V2B9;G3V544;G3V5R8;G3V387;A0A0B4J278	A0A024R6I7;A0A0G2JRN3		SERPINA1
0	0	0	0	0	0	0	21483000	0	0	0	0				0	1	1	1	0,3	0,3	0,3	426,09	0	7,7078	218770000	19	A0A087WV90;E9PDN5;A0A087WTU7;A0A075B6G3;P11532	A0A087WV90;E9PDN5;A0A087WTU7;A0A075B6G3;P11532	Dystrophin	DMD
0	0	0	0	0	0	0	0	17994000	0	0	0				0	1	1	1	12,5	12,5	12,5	11,434	0,0079365	6,4133	90654000	1	A0A087X0Q4;A2NJV5;A0A0A0MRZ7;A0A075B6S6;A0A075B6S2;A0A075B6P5;A0A087WW87;P06310;P01615;P01614	A0A087X0Q4;A2NJV5;A0A0A0MRZ7;A0A075B6S6;A0A075B6S2;A0A075B6P5;A0A087WW87;P06310;P01615;P01614	Ig kappa chain V-II region RPMI 6410;Ig kappa chain V-II region FR;Ig kappa chain V-II region Cum	IGKV2-40;IGKV A18;IGKV2D-26;IGKV2D-30;IGKV2D-29;IGKV2D-28
0	0	0	0	34364000	0	0	0	0	0	0	0				0	1	1	1	5,6	5,6	5,6	39,147	0,0080863	6,4717	71704000	2	A0A087WTG3	A0A087WTG3		CUL3
1599700	0	0	0	0	0	0	0	0	0	0	0				0	4	4	4	8,2	8,2	8,2	58,535	0	24,154	20431000	8	A0A087WTT1;P11940;E7EQV3;E7ERJ7;Q9H361;E5RH24;E5RJB9;H0YAR2;Q4VXU2;E5RGC4;E5RFD8;E5RHG7;E5RGH3;H0YAP2;H0YB86;H0YBN4;Q5JQF8;Q96DU9	A0A087WTT1;P11940;E7EQV3;E7ERJ7;Q9H361;E5RH24;E5RJB9;H0YAR2;Q4VXU2	Polyadenylate-binding protein;Polyadenylate-binding protein 1;Polyadenylate-binding protein 3;Polyadenylate-binding protein 1-like	PABPC1;PABPC3;PABPC1L
1286800	0	0	1017300	0	858910	0	0	0	0	0	0				0	3	3	3	10,3	10,3	10,3	29,836	0	20,971	35010000	6	A0A087WUI2;P22626	A0A087WUI2;P22626	Heterogeneous nuclear ribonucleoproteins A2/B1	HNRNPA2B1
0	0	0	27799000	0	0	0	0	0	0	0	0				0	2	2	2	1	1	1	274,83	0	11,778	218780000	4	A0A087WUZ3;Q01082;F8W6C1	A0A087WUZ3;Q01082;F8W6C1	Spectrin beta chain, non-erythrocytic 1	SPTBN1
22938000	9346500	6455600	2150700	3613500	2100100	1649100	882900	1179600	0	1257800	860860				0	14	14	14	11,9	11,9	11,9	192,06	0	129,63	129410000	33	A0A087WVQ6;Q00610;J3KS13;A0A087WX41;P53675;J3KRF5;K7EJJ5;J3KSQ2;F5H5N6	A0A087WVQ6;Q00610	Clathrin heavy chain;Clathrin heavy chain 1	CLTC
5595300	50095000	5989700	4988300	6584000	5315700	0	0	0	0	0	0				0	6	6	6	16,7	16,7	16,7	56,967	0	46,327	87911000	16	A0A087WYS1;E7EUC7;Q16851;C9JVG3;C9JQU9;C9JNZ1;C9JWG0;C9JTZ5;C9JUW1	A0A087WYS1;E7EUC7;Q16851;C9JVG3;C9JQU9;C9JNZ1	UTP--glucose-1-phosphate uridylyltransferase	UGP2
3194200	6329100	0	0	0	3780800	0	0	0	0	0	0				0	2	2	2	11,2	11,2	11,2	25,041	0	12,976	50499000	3	A0A087WYS6;O14818;Q8TAA3;H0Y586	A0A087WYS6;O14818;Q8TAA3;H0Y586	Proteasome subunit alpha type-7;Proteasome subunit alpha type-7-like	PSMA8;PSMA7
0	0	0	0	0	0	574250	0	0	0	0	0				0	2	2	2	2	2	2	113,79	0	10,77	1353600	1	A0A087X0H9;Q5T8P6;E2PSN0	A0A087X0H9;Q5T8P6;E2PSN0	RNA-binding protein 26	RBM26
0	7045700	4701100	57504000	27080000	18819000	81955000	75642000	48752000	35673000	44110000	32755000				0	10	10	10	13,4	13,4	13,4	108,34	0	96,348	383530000	59	A0A087X0S5;P12109	A0A087X0S5;P12109	Collagen alpha-1(VI) chain	COL6A1
0	0	0	0	0	0	0	0	1826700032	0	0	0				0	1	1	1	1,3	1,3	1,3	111,83	0,0028902	6,8423	14424000000	25	A0A0A0MSU2;A0A1C7CYX1;Q6PJG2	A0A0A0MSU2;A0A1C7CYX1;Q6PJG2	ELM2 and SANT domain-containing protein 1	ELMSAN1
0	0	0	0	0	5353100	0	0	0	0	0	0				0	2	2	2	10,4	10,4	10,4	30,37	0	13,672	9374000	2	A0A0J9YXP8;A0A0J9YX90;A0A0J9YYH3;K7EQ48;A0A0A0MTS2;P06744	A0A0J9YXP8;A0A0J9YX90;A0A0J9YYH3;K7EQ48;A0A0A0MTS2;P06744	Glucose-6-phosphate isomerase	GPI
10647000	6158700	7408000	3131400	3025500	0	0	0	0	1420600	0	0				0	3	3	3	13,2	13,2	13,2	31,124	0	92,021	138680000	20	A0A0C4DFV9;Q01105;A0A087X027;P0DME0	A0A0C4DFV9;Q01105;A0A087X027;P0DME0	Protein SET;Protein SETSIP	SET;SETSIP
4962200	4814800	11244000	3237300	5718400	7350100	2222100	3042700	4105600	1696600	2542700	2238000				0	5	5	5	26,2	26,2	26,2	29,404	0	33,775	96314000	17	C9J9K3;A0A0C4DG17;P08865;F8WD59	C9J9K3;A0A0C4DG17;P08865;F8WD59	40S ribosomal protein SA	RPSA
0	0	0	0	32472000	0	0	0	0	0	0	0				0	1	1	1	32,4	32,4	32,4	4,0347	0,0054795	6,5697	183560000	2	G3V521;G3V4R2;G3V332;G3V427;A0A0C4DGJ8;Q6IPR1	G3V521;G3V4R2;G3V332;G3V427;A0A0C4DGJ8;Q6IPR1	LYR motif-containing protein 5	LYRM5
0	0	0	0	0	0	1234900	0	0	0	0	0				0	1	1	1	6,1	6,1	6,1	25,428	0,0028011	6,6783	12144000	13	I3L1J1;B4DYU0;A0A0C4DGN2;I3L145;P04278	I3L1J1;B4DYU0;A0A0C4DGN2;I3L145;P04278	Sex hormone-binding globulin	SHBG
0	0	0	0	0	0	0	3491300	0	0	0	0				0	1	1	1	13,8	13,8	13,8	12,515	0	8,081	29315000	7	A0A0C4DH25;P01619	A0A0C4DH25;P01619	Ig kappa chain V-III region B6	IGKV3D-20
0	0	0	0	0	5787100	5388000	6218400	0	0	0	0				0	2	2	2	4,6	4,6	4,6	65,769	0	13,622	35676000	6	A0A0G2JH38;E7ETN3;B4E1Z4;P00751;H7C5H1	A0A0G2JH38;E7ETN3;B4E1Z4;P00751;H7C5H1	Complement factor B;Complement factor B Ba fragment;Complement factor B Bb fragment	CFB
1631800	16770000	2895500	0	1870900	1502200	966700	975480	0	0	0	0				0	4	4	4	14,3	14,3	14,3	38,125	0	43,144	41657000	8	A0A0G2JJZ9;Q13838;H0Y400;A0A140T9X3;Q5STU3;O00148;A0A140T9X9;A0A140T996;F6UJC5;A0A140TA18;F6WLT2;A0A140T9K2;A0A140T9N3;A0A140T9L4;A0A140T973;A0A140T9K1;H0YCC6;F6QYI9;A0A0G2JJL7;F6R6M7;F6S4E6;A0A0A0MT12;F6TRA5	A0A0G2JJZ9;Q13838;H0Y400;A0A140T9X3;Q5STU3;O00148;A0A140T9X9;A0A140T996;F6UJC5;A0A140TA18;F6WLT2	Spliceosome RNA helicase DDX39B;ATP-dependent RNA helicase DDX39A	DDX39B;DDX39A
6528500	3772300	15970000	2542100	5031200	1751300	1066700	774740	1425500	777280	862640	0				0	8	8	8	5	5	5	273,2	0	54,745	94344000	28	A0A0U1RQF0;P49327	A0A0U1RQF0;P49327	Fatty acid synthase;[Acyl-carrier-protein] S-acetyltransferase;[Acyl-carrier-protein] S-malonyltransferase;3-oxoacyl-[acyl-carrier-protein] synthase;3-oxoacyl-[acyl-carrier-protein] reductase;3-hydroxyacyl-[acyl-carrier-protein] dehydratase;Enoyl-[acyl-carrier-protein] reductase;Oleoyl-[acyl-carrier-protein] hydrolase	FASN
5259600	41920000	46294000	42600000	5552900	2700500	5259200	3359800	2893100	4520600	4653700	4086100				0	3	3	3	20,7	20,7	20,7	18,481	0	24,299	184080000	29	A0A0U1RR32;A0A0U1RRH7;Q99878;Q96KK5;Q9BTM1;Q16777;Q93077;Q7L7L0;Q6FI13;P20671;P0C0S8;P04908;H0YFX9;C9J0D1;Q71UI9;P0C0S5;Q96QV6;P16104;C9J386;Q8IUE6	A0A0U1RR32;A0A0U1RRH7;Q99878;Q96KK5;Q9BTM1;Q16777;Q93077;Q7L7L0;Q6FI13;P20671;P0C0S8;P04908;H0YFX9;C9J0D1;Q71UI9;P0C0S5;Q96QV6;P16104	Histone H2A type 1-J;Histone H2A type 1-H;Histone H2A.J;Histone H2A type 2-C;Histone H2A type 1-C;Histone H2A type 3;Histone H2A type 2-A;Histone H2A type 1-D;Histone H2A type 1;Histone H2A type 1-B/E;Histone H2A;Histone H2A.V;Histone H2A.Z;Histone H2A type 1-A;Histone H2AX	HIST1H2AJ;HIST1H2AH;H2AFJ;HIST2H2AC;HIST1H2AC;HIST3H2A;HIST2H2AA3;HIST1H2AD;HIST1H2AG;HIST1H2AB;H2AFV;H2AFZ;HIST1H2AA;H2AFX
0	0	0	105050	0	0	0	0	0	0	0	0				0	1	1	1	6,7	6,7	6,7	16,425	0,0028736	6,7833	3050900	2	A0A1B0GTT5;B0YJC4;P08670	A0A1B0GTT5;B0YJC4;P08670	Vimentin	VIM
1471000	0	0	0	0	0	0	0	0	0	0	0				0	3	3	3	7,9	7,9	7,9	43,688	0	19,041	26510000	4	A0A1B0GW44;A0A1B0GVP3;A0A1B0GV23;A0A1B0GVD5;A0A1B0GWE8;P07339;F8WD96;C9JH19;H7C469;A0A1B0GU92;A0A1B0GU03;H7C1V0;F8W787	A0A1B0GW44;A0A1B0GVP3;A0A1B0GV23;A0A1B0GVD5;A0A1B0GWE8;P07339;F8WD96;C9JH19;H7C469;A0A1B0GU92;A0A1B0GU03	Cathepsin D;Cathepsin D light chain;Cathepsin D heavy chain	CTSD
0	0	0	0	0	0	0	0	0	0	0	0				0	5	5	5	9,8	9,8	9,8	81,794	0	30,863	18283000	5	A0A1X7SBS1;A0A1W2PPS1;Q00839;A0A1W2PP35;A0A1W2PRZ7;A0A1W2PQ74;A0A1W2PQL0;A0A1W2PP34;A0A1W2PPL4;A0A1W2PPH7;Q5RI18;A0A1W2PP22;A0A1W2PQD4	A0A1X7SBS1;A0A1W2PPS1;Q00839;A0A1W2PP35;A0A1W2PRZ7;A0A1W2PQ74;A0A1W2PQL0;A0A1W2PP34;A0A1W2PPL4;A0A1W2PPH7;Q5RI18	Heterogeneous nuclear ribonucleoprotein U	HNRNPU
0	0	0	0	0	0	0	0	10717000	0	0	0				0	2	1	1	32,1	17,9	17,9	11,265	0	13,505	123140000	56	P0DOY3;P0DOY2;P0CF74;A0M8Q6	P0DOY3;P0DOY2;P0CF74;A0M8Q6	Ig lambda-6 chain C region;Ig lambda-7 chain C region	IGLC6;IGLC7
0	0	0	0	0	0	0	0	28755000	0	0	0				0	1	1	1	7,6	7,6	7,6	10,631	0	12,269	161310000	27	C9JNR5;A6XGL2;P01308;F8WCM5	C9JNR5;A6XGL2;P01308;F8WCM5	Insulin;Insulin B chain;Insulin A chain;Insulin, isoform 2	INS;INS-IGF2
0	0	0	0	0	0	0	12308000	0	0	0	0				0	1	1	1	13,7	13,7	13,7	12,815	0	13,259	55683000	9	B0YIW2;P02656	B0YIW2;P02656	Apolipoprotein C-III	APOC3
0	0	0	0	0	0	0	0	3623700	0	0	0				0	4	1	1	8,7	2,8	2,8	78,329	0	18,49	41361000	21	B1AHL2;B1AHM7;H7C1M6;B1AHM9	B1AHL2;B1AHM7;H7C1M6;B1AHM9	Fibulin-1	FBLN1
363690	0	0	0	0	0	0	0	0	0	0	0				0	1	1	1	12,7	12,7	12,7	9,1033	0,0054945	6,5826	1535500	1	C9JD14;B1AKQ8;C9JZN1;F6X3N5;F6UT28;F5H8J8;F5H100;C9JIS1;C9JXA5;F5H0S8;E7EP32;E9PCP0;Q9HAV0;P62879;P62873;P16520	C9JD14;B1AKQ8;C9JZN1;F6X3N5;F6UT28;F5H8J8;F5H100;C9JIS1;C9JXA5;F5H0S8;E7EP32;E9PCP0;Q9HAV0;P62879;P62873;P16520	Guanine nucleotide-binding protein subunit beta-4;Guanine nucleotide-binding protein G(I)/G(S)/G(T) subunit beta-2;Guanine nucleotide-binding protein G(I)/G(S)/G(T) subunit beta-1;Guanine nucleotide-binding protein G(I)/G(S)/G(T) subunit beta-3	GNB4;GNB1;GNB2;GNB3
0	0	0	0	0	0	0	0	10948000	0	0	0				0	1	1	1	7,3	7,3	7,3	19,288	0	15,156	200320000	28	B1AN99;P35030	B1AN99;P35030	Trypsin-3	PRSS3
0	0	753930	383560	0	0	0	0	0	0	0	0				0	2	2	2	34,8	34,8	34,8	7,2803	0	14,016	24418000	2	G3V4M8;G3V5X6;G3V3K6;G3V251;B4DSU6;G3V555;G3V575;G3V576;G3V4W0;B4DY08;B2R5W2;G3V4C1;G3V2Q1;P07910;G3V2H6;A0A0G2JPF8;A0A0G2JNQ3;P0DMR1;O60812;B7ZW38;B2RXH8	G3V4M8;G3V5X6;G3V3K6;G3V251;B4DSU6;G3V555;G3V575;G3V576;G3V4W0;B4DY08;B2R5W2;G3V4C1;G3V2Q1;P07910;G3V2H6;A0A0G2JPF8;A0A0G2JNQ3;P0DMR1;O60812;B7ZW38;B2RXH8	Heterogeneous nuclear ribonucleoproteins C1/C2;Heterogeneous nuclear ribonucleoprotein C-like 4;Heterogeneous nuclear ribonucleoprotein C-like 1;Heterogeneous nuclear ribonucleoprotein C-like 3;Heterogeneous nuclear ribonucleoprotein C-like 2	HNRNPC;HNRNPCL4;HNRNPCL1;HNRNPCL3;HNRNPCL2
0	0	0	0	0	1034300032	1180000000	1239699968	1811100032	2053100032	1305400064	0				0	1	1	1	2,2	2,2	2,2	57,183	0,0080214	6,4613	11509000000	12	B3KTU7;Q9BSJ2	B3KTU7;Q9BSJ2	Gamma-tubulin complex component 2	TUBGCP2
7307800	0	0	0	0	0	0	0	0	0	0	0				0	3	3	3	25	25	25	10,334	0	27,881	189570000	22	K7EMV3;B4DEB1;K7EK07;K7ES00;Q71DI3;Q16695;P84243;P68431;K7EP01;Q5TEC6;Q6NXT2	K7EMV3;B4DEB1;K7EK07;K7ES00;Q71DI3;Q16695;P84243;P68431;K7EP01;Q5TEC6;Q6NXT2	Histone H3;Histone H3.2;Histone H3.1t;Histone H3.3;Histone H3.1;Histone H3.3C	H3F3B;H3F3A;HIST2H3A;HIST3H3;HIST1H3A;HIST2H3PS2;H3F3C
2240400	1530900	0	1541800	1637100	3980400	0	0	0	0	1332000	0				0	5	5	5	15,1	15,1	15,1	49,897	0	32,906	32296000	6	B4DNK4;P14618;H3BTN5;H3BQ34;H3BR70	B4DNK4;P14618;H3BTN5;H3BQ34;H3BR70	Pyruvate kinase;Pyruvate kinase PKM	PKM
0	0	0	0	4036700	0	0	0	0	0	0	0				0	1	1	1	37,2	37,2	37,2	4,8535	0	8,081	18186000	6	J3QSA3;F5GZ39;M0R1V7;J3QS39;Q49A90;J3QTR3;F5H6Q2;F5GYU3;F5H2Z3;F5H265;B4DV12;F5H388;F5H747;F5GXK7;J3QKN0;Q5PY61;Q96C32;P62987;P62979;P0CG47;P0CG48	J3QSA3;F5GZ39;M0R1V7;J3QS39;Q49A90;J3QTR3;F5H6Q2;F5GYU3;F5H2Z3;F5H265;B4DV12;F5H388;F5H747;F5GXK7;J3QKN0;Q5PY61;Q96C32;P62987;P62979;P0CG47;P0CG48	Ubiquitin-60S ribosomal protein L40;Ubiquitin;60S ribosomal protein L40;Ubiquitin-40S ribosomal protein S27a;Ubiquitin;40S ribosomal protein S27a;Polyubiquitin-B;Ubiquitin;Polyubiquitin-C;Ubiquitin	UBB;UBC;UBA52;RPS27A
6949900	31872000	26083000	14249000	28194000	3751100	3427800	3031000	11114000	3341200	3809700	5086400				0	4	4	4	15,6	15,6	15,6	38,91	0	68,397	186440000	35	B4DY09;Q12905;X6R6Z1;A0A0A0MRL0	B4DY09;Q12905;X6R6Z1	Interleukin enhancer-binding factor 2	ILF2
466270	0	0	0	0	0	0	0	0	0	0	0				0	2	2	2	18,2	18,2	18,2	21,312	0	13,841	5214200	3	B5MCP9;P62081	B5MCP9;P62081	40S ribosomal protein S7	RPS7
15643000	41824000	33280000	5638000	3528600	6165100	2775100	3317100	3516500	1329600	0	1333000				0	5	5	5	33,3	33,3	33,3	22,436	0	89,257	193470000	22	F5H018;B5MDF5;J3KQE5;P62826;B4DV51;H0YFC6	F5H018;B5MDF5;J3KQE5;P62826;B4DV51	GTP-binding nuclear protein Ran	RAN
0	0	0	0	0	0	0	0	0	0	0	0				0	1	1	1	15,5	15,5	15,5	11,677	0	8,4242	2094100	5	F8VZU9;G3V1Y7;F8VPF3;F8W1R7;J3KND3;G8JLA2;G3V1V0;F8W180;B7Z6Z4;P60660	F8VZU9;G3V1Y7;F8VPF3;F8W1R7;J3KND3;G8JLA2;G3V1V0;F8W180;B7Z6Z4;P60660	Myosin light polypeptide 6	MYL6
0	0	0	0	0	0	0	0	1146100	0	0	0				0	1	1	1	19	19	19	7,0861	0	7,5044	12363000	1	C9J0E4;P01040	C9J0E4;P01040	Cystatin-A;Cystatin-A, N-terminally processed	CSTA
0	0	0	0	0	0	0	0	1047900	0	0	0				0	1	1	1	16,8	16,8	16,8	10,238	0	7,6669	9160300	11	C9JYS1;C9J196;C9JQL4;Q14118	C9JYS1;C9J196;C9JQL4;Q14118	Dystroglycan;Alpha-dystroglycan;Beta-dystroglycan	DAG1
0	0	0	1249400	0	0	0	0	0	0	0	0				0	1	1	1	2	2	2	53,867	0,0028409	6,7466	5019400	2	C9J8Q5;P51649	C9J8Q5;P51649	Succinate-semialdehyde dehydrogenase, mitochondrial	ALDH5A1
0	0	0	0	0	0	0	3973200	0	0	0	0				0	2	2	2	15,8	15,8	15,8	16,698	0	10,874	11218000	1	C9JUG7;F8W9N7;P47755;F8WED3;A0A0D9SET8;P52907	C9JUG7;F8W9N7;P47755;F8WED3;A0A0D9SET8;P52907	F-actin-capping protein subunit alpha-2;F-actin-capping protein subunit alpha-1	CAPZA2;CAPZA1
4299800	1509800	1780700	876560	1907300	1323600	675050	734620	1443700	622360	767760	636440				0	2	2	2	7,9	7,9	7,9	30,302	0	28,405	40989000	16	D6R9P3;D6RD18;D6RBZ0;Q99729	D6R9P3;D6RD18;D6RBZ0;Q99729	Heterogeneous nuclear ribonucleoprotein A/B	HNRNPAB
13843000	11842000	14761000	7758400	13994000	5191900	4072800	4009900	12175000	3332400	6395100	3331300				0	4	4	4	22,6	22,6	22,6	23,076	0	69,195	177530000	46	D6RAF8;Q14103;D6RF44;H0YA96;H0Y8G5;D6RD83;D6RBQ9;A0A087WUK2;O14979	D6RAF8;Q14103;D6RF44;H0YA96;H0Y8G5;D6RD83;D6RBQ9	Heterogeneous nuclear ribonucleoprotein D0	HNRNPD
2664100	0	0	0	0	0	0	0	0	0	0	0				0	3	3	3	12,6	12,6	12,6	23,174	0	18,126	39535000	9	D6RE83;P09936;D6R974;D6R956;D6RF53	D6RE83;P09936;D6R974;D6R956	Ubiquitin carboxyl-terminal hydrolase;Ubiquitin carboxyl-terminal hydrolase isozyme L1	UCHL1
0	0	0	0	0	0	0	1328800	0	0	0	0				0	1	1	1	2,8	2,8	2,8	39,264	0,0028571	6,7625	9925300	2	Q86W61;D6RGZ6;E9PF17;P13611	Q86W61;D6RGZ6;E9PF17;P13611	Versican core protein	VCAN
0	0	0	0	0	0	0	2327200	0	0	0	0				0	1	1	1	1,7	1,7	1,7	173,48	0,0079576	6,4185	30179000	1	E2RYF6	E2RYF6	Mucin-22	MUC22
1619300	1338700	0	2759200	0	10653000	1634900	2079900	0	0	0	0				0	2	2	2	24,1	24,1	24,1	9,4069	0	15,713	52342000	30	E5RJF6;E5RJI8;E5RH81;H0YBE2;E5RFE7;E5RHP7;P00915;E5RG81	E5RJF6;E5RJI8;E5RH81;H0YBE2;E5RFE7;E5RHP7;P00915;E5RG81	Carbonic anhydrase 1	CA1
0	0	0	0	0	0	0	0	0	0	0	0				0	1	1	1	23,9	23,9	23,9	5,4292	0	7,2013	15824000	2	E5RIP1;E5RJX2;P60866	E5RIP1;E5RJX2;P60866	40S ribosomal protein S20	RPS20
0	0	0	0	0	0	0	4625500	0	0	0	0				0	1	1	1	23,5	23,5	23,5	8,9413	0,0055096	6,5859	20432000	1	F5H431;F5GZK7;E7EN77;Q15021	F5H431;F5GZK7;E7EN77;Q15021	Condensin complex subunit 1	NCAPD2
0	0	0	0	0	1451800	0	0	0	0	0	0				0	1	1	1	23,4	23,4	23,4	5,3212	0,008	6,4613	16247000	1	H0YLJ8;H0YL94;H0YMN7;E9PLD0;E7END7;H0YNE9;P61026;Q9H0U4;Q92928;P51153;P62820;Q92930;P61006;P59190	H0YLJ8;H0YL94;H0YMN7;E9PLD0;E7END7;H0YNE9;P61026;Q9H0U4;Q92928;P51153;P62820;Q92930;P61006;P59190	Ras-related protein Rab-10;Ras-related protein Rab-1B;Putative Ras-related protein Rab-1C;Ras-related protein Rab-13;Ras-related protein Rab-1A;Ras-related protein Rab-8B;Ras-related protein Rab-8A;Ras-related protein Rab-15	RAB8B;RAB1B;RAB1A;RAB10;RAB1C;RAB13;RAB8A;RAB15
10404000	4025200	4510000	5288500	5431700	13566000	1274100	1165600	0	670460	822080	827710				0	6	6	6	9,7	9,7	9,7	69,371	0	52,143	96286000	21	E7EQR4;P15311;P26038;P35241;V9GZ54;E9PQ82;E9PNV3	E7EQR4;P15311;P26038;P35241	Ezrin;Moesin;Radixin	EZR;MSN;RDX
0	0	0	0	0	0	0	0	0	0	0	0				0	4	4	3	35,7	35,7	28	17,916	0	28,59	33595000	8	E9PI65;P11142;E9PQQ4;E9PQK7;E9PK54;E9PLF4;E9PN89;E9PKE3;P54652	E9PI65;P11142;E9PQQ4;E9PQK7;E9PK54;E9PLF4;E9PN89;E9PKE3;P54652	Heat shock cognate 71 kDa protein;Heat shock-related 70 kDa protein 2	HSPA8;HSPA2
7853400	0	0	0	0	4410100	0	0	0	0	0	0				0	4	4	4	35,6	35,6	35,6	16,811	0	26,399	62854000	5	G3V1A4;E9PP50;E9PK25;P23528;E9PQB7;E9PLJ3;Q9Y281;E9PS23	G3V1A4;E9PP50;E9PK25;P23528;E9PQB7;E9PLJ3;Q9Y281	Cofilin-1;Cofilin-2	CFL1;CFL2
877380	0	672140	0	542800	0	0	0	0	0	0	0				0	3	3	3	11,4	11,4	11,4	37,709	0	17,078	7521500	3	E9PKG1;Q99873;E9PIX6;E9PNR9;E9PQ98;H0YDE4	E9PKG1;Q99873;E9PIX6	Protein arginine N-methyltransferase 1	PRMT1
0	0	0	0	2395600	0	0	0	0	0	0	0				0	1	1	1	7,4	7,4	7,4	16,18	0	10,39	22689000	4	E9PP36;E9PKZ0;E9PKU4;P62917	E9PP36;E9PKZ0;E9PKU4;P62917	60S ribosomal protein L8	RPL8
6690400	7821600	6792500	4215900	5938200	0	0	0	0	0	0	0				0	4	4	4	21,6	21,6	21,6	25,371	0	26,535	61611000	11	E9PL09;P23396;E9PPU1;H0YEU2;F2Z2S8;H0YF32;H0YCJ7;E9PQ96;E9PSF4;E9PJH4;E9PK82	E9PL09;P23396;E9PPU1;H0YEU2;F2Z2S8;H0YF32;H0YCJ7	40S ribosomal protein S3	RPS3
8102200	5718100	7938900	5970000	8289900	5915100	5140100	0	0	4017700	5103000	3987800				0	4	4	4	5,1	5,1	5,1	102,99	0	24,108	115490000	8	E9PLK3;P55786;A6NEC2;H0YCQ5;E9PJ74;H0YDG0;E9PRQ5	E9PLK3;P55786;A6NEC2	Puromycin-sensitive aminopeptidase;Puromycin-sensitive aminopeptidase-like protein	NPEPPS;NPEPPSL1
0	0	3564300	0	0	0	0	0	0	0	0	0				0	1	1	1	3,5	3,5	3,5	35,328	0,0029155	6,8841	16303000	2	F2Z393;P37837	F2Z393;P37837	Transaldolase	TALDO1
3075400	3141800	2846200	10319000	13120000	7197700	54295000	69866000	46705000	6134200	9759200	7799000				0	5	5	5	28,9	28,9	28,9	17,47	0	68,465	217630000	30	F5GY03;P09486;E5RK62	F5GY03;P09486;E5RK62	SPARC	SPARC
0	0	0	0	10396000	0	0	0	0	0	0	0				0	1	1	1	5,7	5,7	5,7	15,646	0,0054201	6,5276	65978000	5	Q68DM5;F5GYA2	Q68DM5;F5GYA2	Uracil-DNA glycosylase	DKFZp781L1143;UNG
0	0	0	0	0	0	0	0	0	0	0	0				0	1	1	1	35	35	35	4,5987	0,0055249	6,5927	6447100	4	F5H4G3;F5GZF6;F5H366;F5H2I9;Q6J9G0	F5H4G3;F5GZF6;F5H366;F5H2I9;Q6J9G0	Tyrosine-protein kinase STYK1	STYK1
368020	227280	341380	242900	224410	0	0	0	0	0	0	0				0	2	2	2	4,3	4,3	4,3	64,872	0	12,26	7355900	2	F5GZS6;J3KPF3;P08195;H0YFX4;F5GZI0	F5GZS6;J3KPF3;P08195;H0YFX4;F5GZI0	4F2 cell-surface antigen heavy chain	SLC3A2
0	0	0	0	0	242750	0	0	0	0	0	0				0	2	2	2	24,5	24,5	24,5	11,618	0	22,864	5322200	3	F5H0C7;F5H423;P84077;P61204;F5H1V1;F5H6T5;F8WDB3;C9JPM4;C9J1Z8;P84085;P18085	F5H0C7;F5H423;P84077;P61204;F5H1V1;F5H6T5;F8WDB3;C9JPM4;C9J1Z8;P84085;P18085	ADP-ribosylation factor 1;ADP-ribosylation factor 3;ADP-ribosylation factor 5;ADP-ribosylation factor 4	ARF3;ARF1;ARF4;ARF5
0	4899700	4154700	0	0	0	0	0	0	0	0	0				0	4	4	4	4,5	4,5	4,5	110,61	0	32,389	20389000	5	F5H2F4;P11586;V9GYY3	F5H2F4;P11586	C-1-tetrahydrofolate synthase, cytoplasmic;Methylenetetrahydrofolate dehydrogenase;Methenyltetrahydrofolate cyclohydrolase;Formyltetrahydrofolate synthetase;C-1-tetrahydrofolate synthase, cytoplasmic, N-terminally processed	MTHFD1
16026000	10057000	3590800	5799800	5687700	28199000	1766100	2472300	2099500	2058000	0	1194500				0	10	10	5	24,3	24,3	13,5	57,73	0	75,236	245730000	43	F5H5D3;Q9BQE3;Q71U36;P68363;A0A1W2PQM2;Q13748;Q6PEY2;F8VVB9;C9J2C0;P68366;V9GZ17;F8VRZ4;F8VS66;F8VQQ4;F8VRK0;F8VX09;F8VWV9;C9JDS9;A6NHL2;F8VXZ7;F8W0F6;Q9H853	F5H5D3;Q9BQE3;Q71U36;P68363;A0A1W2PQM2;Q13748;Q6PEY2;F8VVB9;C9J2C0;P68366	Tubulin alpha-1C chain;Tubulin alpha-1A chain;Tubulin alpha-1B chain;Tubulin alpha-3C/D chain;Tubulin alpha-3E chain;Tubulin alpha-4A chain	TUBA1C;TUBA1A;TUBA1B;TUBA3C;TUBA3E;TUBA8;TUBA4A
0	0	0	0	0	0	0	0	2077600	0	0	0				0	2	2	2	16,4	16,4	16,4	16,219	0	12,964	16438000	3	H7C3I1;F6VDH7;Q3KNR6;Q8IZP2;P50502;Q8NFI4	H7C3I1;F6VDH7;Q3KNR6;Q8IZP2;P50502;Q8NFI4	Putative protein FAM10A4;Hsc70-interacting protein;Putative protein FAM10A5	ST13;ST13P4;ST13P5
0	0	0	0	0	29652	0	0	0	0	0	0				0	1	1	1	23,8	23,8	23,8	7,1906	0,0028329	6,7439	791140	2	F8VR69;F8VZ45;U3KQR5;Q02878	F8VR69;F8VZ45;U3KQR5;Q02878	60S ribosomal protein L6	RPL6
13372000	12473000	5157700	2367500	4266700	3909500	2224600	1839100	2234000	0	1494100	0				0	5	5	5	42,1	42,1	42,1	16,536	0	32,315	153690000	19	F8VTQ5;F8W6I7;P09651;F8VZ49;Q32P51;F8VYN5;F8W646;H0YH80	F8VTQ5;F8W6I7;P09651;F8VZ49;Q32P51	Heterogeneous nuclear ribonucleoprotein A1;Heterogeneous nuclear ribonucleoprotein A1, N-terminally processed;Heterogeneous nuclear ribonucleoprotein A1-like 2	HNRNPA1;HNRNPA1L2
2165200	3356900	2768300	0	2463200	4839300	1932300	2022900	1952900	1467500	0	0				0	4	4	4	17,8	17,8	17,8	27,187	0	28,001	49120000	13	F8VU65;P05388;F8VPE8;G3V210;F8VW21;F8VWS0;Q8NHW5;F8VS58;F8VQY6;F8VRK7;F8VZS0;F8VWV4	F8VU65;P05388;F8VPE8;G3V210;F8VW21;F8VWS0;Q8NHW5;F8VS58;F8VQY6;F8VRK7;F8VZS0	60S acidic ribosomal protein P0;60S acidic ribosomal protein P0-like	RPLP0;RPLP0P6
0	0	0	0	0	0	0	0	12190000	0	0	0				0	2	2	2	1,5	1,5	1,5	203,78	0	11,338	108100000	7	F8WAE6;Q86YW9	F8WAE6;Q86YW9	Mediator of RNA polymerase II transcription subunit 12-like protein	MED12L
0	0	0	0	0	2120300	0	0	0	0	0	0				0	1	1	1	4,8	4,8	4,8	24,594	0,002849	6,753	8385700	3	G3XAL0;P40926	G3XAL0;P40926	Malate dehydrogenase;Malate dehydrogenase, mitochondrial	MDH2
6289400	1633000	1861900	1588600	2059500	1512000	0	0	1541200	0	0	0				0	5	5	5	5,6	5,6	5,6	123,75	0	29,328	34927000	7	H0Y8C6;O00410	H0Y8C6;O00410	Importin-5	IPO5
0	5141400	10458000	6686600	12348000	3608800	0	0	0	0	0	0				0	3	3	3	19,7	19,7	19,7	21,934	0	22,513	55952000	10	H0YAF8;J3KPE3;H0Y8W2;P63244;D6RAU2;E9PD14;D6RFX4;D6RFZ9;D6RHH4;D6R9Z1;H0YAM7;D6R9L0;H0Y9P0;D6RF23;D6RAC2;D6REE5	H0YAF8;J3KPE3;H0Y8W2;P63244;D6RAU2;E9PD14;D6RFX4;D6RFZ9;D6RHH4;D6R9Z1;H0YAM7;D6R9L0	Guanine nucleotide-binding protein subunit beta-2-like 1;Guanine nucleotide-binding protein subunit beta-2-like 1, N-terminally processed	GNB2L1
0	2038000	2074200	2888400	3285300	1971200	3487300	3595900	0	0	0	0				0	2	2	2	12,3	12,3	12,3	33,419	0	13,353	29324000	15	H0YC35;P10909;H0YAS8;E7ERK6;H0YLK8	H0YC35;P10909;H0YAS8;E7ERK6;H0YLK8	Clusterin;Clusterin;Clusterin beta chain;Clusterin alpha chain	CLU
0	0	0	0	0	0	0	0	2899000	0	0	0				0	1	1	1	1,9	1,9	1,9	81,066	0	20,402	199760000	25	H0YEM4;Q502W6	H0YEM4;Q502W6	von Willebrand factor A domain-containing protein 3B	VWA3B
0	692700	0	756240	0	1237500	0	0	735190	0	0	0				0	4	4	4	15,2	15,2	15,2	38,138	0	23,511	21381000	4	H0YH81;P06576;F8W079;F8W0P7;H0YI37	H0YH81;P06576;F8W079;F8W0P7	ATP synthase subunit beta;ATP synthase subunit beta, mitochondrial	ATP5B
0	0	0	0	3300600	0	0	0	0	0	0	0				0	1	1	1	8,3	8,3	8,3	24,16	0	10,531	19693000	3	H0YK49;H0YL12;H0YNX6;H0YLU7;P13804	H0YK49;H0YL12;H0YNX6;H0YLU7;P13804	Electron transfer flavoprotein subunit alpha, mitochondrial	ETFA
0	0	0	0	0	0	0	0	0	0	0	0				0	1	1	1	8	8	8	13,948	0,0028653	6,7797	6386600	1	H0YLS6;H0YLC2;H0YKT8;H0YMI6;H0YMA1;H0YMZ1;H0YN18;H0YL69;P25789	H0YLS6;H0YLC2;H0YKT8;H0YMI6;H0YMA1;H0YMZ1;H0YN18;H0YL69;P25789	Proteasome subunit alpha type;Proteasome subunit beta type;Proteasome subunit alpha type-4	PSMA4
1807500	0	0	0	0	0	0	0	0	0	0	0				0	2	2	2	22	22	22	11,477	0	12,581	23156000	2	I3L3P7;I3L246;H3BN98;P62244	I3L3P7;I3L246;H3BN98;P62244	40S ribosomal protein S15a	RPS15A
0	0	0	0	0	0	0	8319400	0	0	0	0				0	1	1	1	2,1	2,1	2,1	47,757	0	7,5992	19105000	4	H3BTH8;Q96S86;Q86UW8	H3BTH8;Q96S86;Q86UW8	Hyaluronan and proteoglycan link protein 3;Hyaluronan and proteoglycan link protein 4	HAPLN3;HAPLN4
0	0	0	0	0	0	2690800	2945000	2567100	13653000	5791100	11163000				0	2	2	2	6,4	6,4	6,4	70,733	0	15,763	20049000	11	H7BXV5;P39060;H7C457	H7BXV5;P39060;H7C457	Collagen alpha-1(XVIII) chain;Endostatin	COL18A1
0	0	0	0	1871200	0	0	0	0	0	0	0				0	1	1	1	0,5	0,5	0,5	185,87	0,0054054	6,5033	12433000	2	H7BZ55	H7BZ55	Putative ciliary rootlet coiled-coil protein-like 3 protein
0	0	0	0	0	2403900	0	0	0	0	0	0				0	1	1	1	11,4	11,4	11,4	13,519	0	64,606	3054400	2	H7BZJ3	H7BZJ3		PDIA3
714400	1025200	1317900	2941100	2631000	0	8846300	9116000	2775900	1955100	0	1504400				0	2	2	2	2,8	2,8	2,8	79,755	0	17,144	34944000	20	H7C1W1;Q92626	H7C1W1;Q92626	Peroxidasin homolog	PXDN
0	0	0	0	10283000	0	0	0	0	0	0	0				0	7	2	2	10,9	3,9	3,9	94,825	0	12,359	73586000	2	H9KV75;P12814;H7C5W8;H0YJ11;H0YJW3;G3V2W4;P35609;G3V2E8;G3V5M4;G3V2X9;K7EJH8;G3V2N5;F6THM6;A0A087WSZ2;Q08043	H9KV75;P12814;H7C5W8;H0YJ11;H0YJW3	Alpha-actinin-1	ACTN1
0	0	0	0	0	0	0	0	186570000	0	0	0				0	1	1	1	7,4	7,4	7,4	25,922	0	8,4042	788410000	29	I3L4V6	I3L4V6		NXN
0	0	0	0	0	0	0	0	0	0	3753700	9664700				0	5	2	2	8,7	3,2	3,2	70,449	0	12,638	9206100	6	J3KMX3;P02771	J3KMX3;P02771	Alpha-fetoprotein	AFP
77907000	107060000	75125000	31460000	111180000	73945000	14095000	18259000	29818000	18848000	27628000	24797000				0	14	14	13	45,7	45,7	43,8	39,817	0	121,45	942230000	86	J3KPS3;P04075;H3BQN4;H3BPS8;H3BUH7;H3BR04;H3BMQ8;H3BU78;H3BR68;A0A087WXX2;P05062	J3KPS3;P04075;H3BQN4;H3BPS8;H3BUH7;H3BR04;H3BMQ8	Fructose-bisphosphate aldolase;Fructose-bisphosphate aldolase A	ALDOA
4833200	0	0	0	3994100	0	0	0	0	0	0	0				0	5	5	5	36,8	36,8	36,8	18,043	0	40,487	88862000	5	J3QLN6;J3QR64;J3KTB5;J3QL43;J3QS69;J3KT12;P60842;J3QKZ9;J3KS25;J3KSZ0;E7EQG2;Q14240;J3KT04;J3KS93;E7EMV8;J3KSN7;J3KTN0	J3QLN6;J3QR64;J3KTB5;J3QL43;J3QS69;J3KT12;P60842;J3QKZ9;J3KS25;J3KSZ0;E7EQG2;Q14240	Eukaryotic initiation factor 4A-I;Eukaryotic initiation factor 4A-II;Eukaryotic initiation factor 4A-II, N-terminally processed	EIF4A1;EIF4A2
0	0	599580	0	0	0	0	0	0	0	0	0				0	1	1	1	4,7	4,7	4,7	17,546	0	15,232	5158100	3	J3QLE5;P63162;P14678	J3QLE5;P63162;P14678	Small nuclear ribonucleoprotein-associated protein N;Small nuclear ribonucleoprotein-associated proteins B and B	SNRPN;SNRPB
0	0	0	0	0	0	0	0	0	0	0	0				0	1	1	1	17,3	17,3	17,3	8,3926	0	7,3359	7508400	1	J3QLI9;P62314	J3QLI9;P62314	Small nuclear ribonucleoprotein Sm D1	SNRPD1
0	0	0	0	0	0	0	0	0	0	0	0				0	1	1	1	23,4	23,4	23,4	5,0827	0	7,3549	9063200	3	K7EJT5;K7EP65;K7EKS7;K7ELC4;K7EMH1;K7ERI7;P35268	K7EJT5;K7EP65;K7EKS7;K7ELC4;K7EMH1;K7ERI7;P35268	60S ribosomal protein L22	RPL22
0	0	0	0	0	0	0	0	18055000	0	0	0				0	1	1	1	6,5	6,5	6,5	22,05	0,0055556	6,6113	69522000	3	K7ELG0;Q96R06	K7ELG0;Q96R06	Sperm-associated antigen 5	SPAG5
3899100	9200000	6347800	4455500	14648000	4903100	0	2841200	3118500	0	0	2324800				0	4	4	4	36,2	36,2	36,2	17,293	0	33,151	64578000	10	K7EMN2;K7EM49;P52209;K7EPF6	K7EMN2;K7EM49;P52209;K7EPF6	6-phosphogluconate dehydrogenase, decarboxylating	PGD
906400	789590	751310	0	0	0	0	0	0	0	0	0				0	2	2	2	34	34	34	5,5575	0	12,06	16563000	8	M0QX76;M0R1M5;M0R3H0;M0R210;Q6IPX4;P62249	M0QX76;M0R1M5;M0R3H0;M0R210;Q6IPX4;P62249	40S ribosomal protein S16	RPS16
1399800	0	0	0	0	0	0	0	0	0	0	0				0	2	2	2	16,1	16,1	16,1	13,997	0	14,907	5909900	2	M0QZC5;P62280	M0QZC5;P62280	40S ribosomal protein S11	RPS11
0	913370	2847100	70742000	83842000	105950000	17461000	16625000	11011000	0	0	0				0	8	8	8	29,2	29,2	29,2	40,92	0	62,709	278350000	50	O00292;O75610;A0A087WW09	O00292;O75610	Left-right determination factor 2;Left-right determination factor 1	LEFTY2;LEFTY1
0	0	0	0	0	0	0	0	1291600	0	0	0				0	1	1	1	7,5	7,5	7,5	26,922	0	22,833	16686000	7	O00299	O00299	Chloride intracellular channel protein 1	CLIC1
0	0	0	2686300	0	0	0	0	0	0	0	0				0	2	2	2	5,2	5,2	5,2	82,577	0	11,842	13807000	3	O00391;A8MXT8	O00391;A8MXT8	Sulfhydryl oxidase 1	QSOX1
0	0	0	0	0	0	0	2319700	0	0	0	0				0	1	1	1	2,3	2,3	2,3	58,635	0,0029412	6,9042	53062000	3	O00592	O00592	Podocalyxin	PODXL
3835100	4163700	9106900	2384700	2509900	1522000	920210	1192700	1309600	1325700	0	0				0	4	4	4	4,3	4,3	4,3	123,38	0	28,113	58128000	20	O14980;H7BZC5;C9IZS4;C9JQ02;C9JV99;C9J673;C9JKM9	O14980	Exportin-1	XPO1
0	0	0	0	2298100	0	0	0	0	0	0	0				0	2	2	2	1,6	1,6	1,6	144,73	0	13,409	6936800	3	O15067;J3KTQ5	O15067;J3KTQ5	Phosphoribosylformylglycinamidine synthase	PFAS
0	0	15689000	18707000	11078000	0	0	0	0	0	0	0				0	2	2	2	2,4	2,4	2,4	104,74	0	12,06	48380000	4	O15327;E9PG59;E9PHC0;D6RJC3;E7EQN9	O15327;E9PG59;E9PHC0;D6RJC3;E7EQN9	Type II inositol 3,4-bisphosphate 4-phosphatase	INPP4B
13709000	20254000	22935000	9535300	16005000	15012000	2997800	3547700	4013500	1697200	2764300	2266600				0	8	8	3	11,7	11,7	5,4	104,85	0	103,19	211760000	46	O43707;H7C144;F5GXS2	O43707;H7C144;F5GXS2	Alpha-actinin-4	ACTN4
0	18114000	16853000	50772000	8699000	0	5508400	6161000	0	0	4753300	0				0	2	2	2	15,1	15,1	15,1	18,804	0	106,27	102590000	25	U3KQK0;Q99880;Q99879;Q99877;Q93079;Q5QNW6;P62807;P58876;P57053;O60814;Q8N257;Q16778;P33778;P23527;P06899	U3KQK0;Q99880;Q99879;Q99877;Q93079;Q5QNW6;P62807;P58876;P57053;O60814;Q8N257;Q16778;P33778;P23527;P06899	Histone H2B;Histone H2B type 1-L;Histone H2B type 1-M;Histone H2B type 1-N;Histone H2B type 1-H;Histone H2B type 2-F;Histone H2B type 1-C/E/F/G/I;Histone H2B type 1-D;Histone H2B type F-S;Histone H2B type 1-K;Histone H2B type 3-B;Histone H2B type 2-E;Histone H2B type 1-B;Histone H2B type 1-O;Histone H2B type 1-J	HIST1H2BN;HIST1H2BL;HIST1H2BM;HIST1H2BH;HIST2H2BF;HIST1H2BC;HIST1H2BD;H2BFS;HIST1H2BK;HIST3H2BB;HIST2H2BE;HIST1H2BB;HIST1H2BO;HIST1H2BJ
0	0	0	0	0	0	0	0	2406100	0	0	0				0	1	1	1	3,6	3,6	3,6	37,329	0,005571	6,6162	23408000	7	O60911	O60911	Cathepsin L2	CTSV
0	0	0	0	0	0	0	0	0	0	0	0				0	6	3	3	3,1	1,8	1,8	278,16	0	19,779	17706000	5	O75369;E7EN95	O75369;E7EN95	Filamin-B	FLNB
880410	0	0	0	0	0	0	0	0	0	0	0				0	2	2	2	1,9	1,9	1,9	145,83	0	10,883	9683000	3	O75533;H7C341	O75533;H7C341	Splicing factor 3B subunit 1	SF3B1
32979000	60337000	64340000	14916000	44111000	27259000	5488500	5508800	21336000	4206900	5845100	3847800				0	8	8	8	22,9	22,9	22,9	46,659	0	67,296	354860000	48	O75874;C9J4N6;C9JJE5;C9JLU6;P48735	O75874;C9J4N6	Isocitrate dehydrogenase [NADP] cytoplasmic	IDH1
0	0	0	0	1942900	0	0	0	0	0	0	0				0	1	1	1	2,1	2,1	2,1	69,223	0	7,2749	11490000	4	O76031	O76031	ATP-dependent Clp protease ATP-binding subunit clpX-like, mitochondrial	CLPX
0	0	2256500	5479600	4713900	2987200	9394600	11744000	4132700	4174200	4457800	4388500				0	4	4	4	6,3	6,3	6,3	88,039	0	30,086	54120000	15	Q5SR54;O94985	Q5SR54;O94985	Calsyntenin-1;Soluble Alc-alpha;CTF1-alpha	CLSTN1
0	11693000	11843000	20534000	22036000	220520000	4495800	0	8380500	0	0	0				0	6	6	6	42,3	42,3	42,3	30,083	0	50,1	297050000	21	O95813	O95813	Cerberus	CER1
53001000	56912000	56222000	48846000	80362000	60411000	23399000	23546000	60392000	34807000	33664000	21137000				0	10	9	9	31,3	27,7	27,7	36,688	0	97,094	674670000	90	P00338;F5GYU2;F5GXY2;F5GXH2;F5H5J4;F5H6W8;F5GZQ4;F5H8H6;F5GXC7;F5GWW2;F5GXU1	P00338;F5GYU2;F5GXY2;F5GXH2	L-lactate dehydrogenase A chain	LDHA
0	0	0	0	1663900	0	0	0	0	0	0	0				0	2	2	2	6,9	6,9	6,9	32,118	0	11,998	10652000	3	P00491;G3V393;G3V5M2	P00491;G3V393;G3V5M2	Purine nucleoside phosphorylase	PNP
0	0	94580	0	0	0	0	0	0	0	0	0				0	7	1	1	4,7	0,8	0,8	163,29	0	7,3514	287860	2	P01023	P01023	Alpha-2-macroglobulin	A2M
0	0	0	0	0	0	0	0	0	0	0	0				0	6	3	3	4	2,8	2,8	187,15	0	19,017	5215800	3	P01024	P01024	Complement C3;Complement C3 beta chain;C3-beta-c;Complement C3 alpha chain;C3a anaphylatoxin;Acylation stimulating protein;Complement C3b alpha chain;Complement C3c alpha chain fragment 1;Complement C3dg fragment;Complement C3g fragment;Complement C3d fragment;Complement C3f fragment;Complement C3c alpha chain fragment 2	C3
0	0	0	0	0	0	0	0	0	0	0	0				0	2	2	2	1,4	1,4	1,4	138,94	0	16,733	42747000	5	P02452	P02452	Collagen alpha-1(I) chain	COL1A1
0	0	0	0	0	0	25024000	24964000	9747500	13918000	10482000	11247000				0	3	3	3	2,6	2,6	2,6	141,78	0	28,154	81051000	8	P02458	P02458	Collagen alpha-1(II) chain;Collagen alpha-1(II) chain;Chondrocalcin	COL2A1
10304000	26848000	18668000	131360000	116780000	68249000	241580000	212590000	270670016	141400000	99512000	117120000				0	14	14	14	49,2	49,2	49,2	36,154	0	323,31	1432800000	212	P02649;H0Y7L5;E9PEV4;E7ERP7;CON__Q03247	P02649;H0Y7L5	Apolipoprotein E	APOE
0	0	0	0	0	0	0	0	27479000	0	0	0				0	1	1	1	19,2	19,2	19,2	5,8767	0	36,604	590180000	20	V9GYE3;V9GYG9;V9GYM3;P02652	V9GYE3;V9GYG9;V9GYM3;P02652	Apolipoprotein A-II;Proapolipoprotein A-II;Truncated apolipoprotein A-II	APOA2
35941000	86355000	43135000	629009984	559609984	192130000	1175200000	1106400000	1140300032	1077200000	686830016	809790016				0	50	50	50	33,9	33,9	33,9	262,62	0	323,31	6285800000	759	P02751;H0Y7Z1;H0Y4K8	P02751;H0Y7Z1	Fibronectin;Anastellin;Ugl-Y1;Ugl-Y2;Ugl-Y3	FN1
0	0	0	0	0	0	0	0	0	0	0	0				0	2	2	2	24,5	24,5	24,5	11,139	0	14,476	87390000	4	P04080;A0A1W2PS52	P04080;A0A1W2PS52	Cystatin-B	CSTB
0	0	0	0	0	0	0	0	0	0	0	0				0	3	3	3	13	13	13	38,714	0	19,001	7153100	3	P04083;Q5T3N1;Q5T3N0	P04083;Q5T3N1	Annexin A1;Annexin	ANXA1
0	5317400	2874500	0	0	0	753960	1105200	0	2347200	2562200	13728000				0	10	10	8	2,7	2,7	2,1	515,6	0	62,813	20093000	23	P04114;A8MUN2	P04114	Apolipoprotein B-100;Apolipoprotein B-48	APOB
0	0	0	0	0	0	0	0	0	0	0	803650				0	4	4	4	36,1	36,1	36,1	22,782	0	51,344	62046000	5	P04792;F8WE04;C9J3N8	P04792;F8WE04	Heat shock protein beta-1	HSPB1
0	1898900	0	2316600	1878300	2011600	20217000	2088400	0	0	0	0				0	6	6	6	52,7	52,7	52,7	10,834	0	40,855	525890000	15	P05109	P05109	Protein S100-A8;Protein S100-A8, N-terminally processed	S100A8
0	34596000	52319000	23807000	15597000	0	0	0	0	0	0	0				0	2	2	2	15,7	15,7	15,7	10,17	0	45,147	101860000	12	S4R3A2;S4R371;P05413	S4R3A2;S4R371;P05413	Fatty acid-binding protein, heart	FABP3
1214700	0	0	0	0	0	0	0	0	0	0	0				0	2	2	2	6,6	6,6	6,6	46,836	0	14,887	10672000	4	P05455;E9PFL9;E7ERC4	P05455;E9PFL9;E7ERC4	Lupus La protein	SSB
0	0	0	0	0	1994200	5747400	0	0	0	0	0				0	6	6	6	56,1	56,1	56,1	13,242	0	78,82	935860000	20	P06702	P06702	Protein S100-A9	S100A9
0	0	0	0	0	0	1721700	1951700	0	4423500	3187500	25490000				0	5	5	4	15,9	15,9	12,9	45,398	0	48,1	26690000	11	P06727	P06727	Apolipoprotein A-IV	APOA4
26753000	5741900	7138200	4474200	4337800	3327300	0	1440400	2098300	0	1995000	0				0	4	4	4	22,1	22,1	22,1	32,575	0	32,556	192070000	18	P06748;E5RI98	P06748;E5RI98	Nucleophosmin	NPM1
0	1356600	0	23111000	45547000	16507000	8501100	5533200	17004000	1724500	2076300	1817000				0	8	8	8	24,9	24,9	24,9	44,002	0	59,756	98168000	32	P07093;C9JN98	P07093;C9JN98	Glia-derived nexin	SERPINE2
92359000	133990000	109770000	117060000	160800000	84952000	31613000	40144000	66472000	29099000	31301000	17684000				0	12	12	11	39,5	39,5	35,9	36,638	0	161,58	1447800000	163	P07195;A8MW50;C9J7H8;F5H793;F5H5G7;F5H155;G3XAP5;F5H245;P07864	P07195;A8MW50;C9J7H8	L-lactate dehydrogenase B chain;L-lactate dehydrogenase	LDHB
5552900	31670000	8218000	16424000	5255200	17360000	1649400	1869200	1337900	0	0	1528300				0	12	12	2	39,2	39,2	6,3	47,766	0	115,89	236220000	68	Q5JP53;P07437;Q5ST81;P04350;A0A0B4J269;Q13509;K7ESM5;Q9BUF5;G3V2A3;A0A075B736;Q5SQY0;Q3ZCM7;A6NNZ2;M0R1I1;G3V5W4;M0QY85;G3V2R8;M0R042;G3V3R4;M0R2D3;M0QZL7;M0QYM7;G3V2N6;M0R278;CON__ENSEMBL:ENSBTAP00000025008;Q9H4B7	Q5JP53;P07437;Q5ST81;P04350;A0A0B4J269;Q13509	Tubulin beta chain;Tubulin beta-4A chain;Tubulin beta-3 chain	TUBB;TUBB4A;TUBB3
57990000	1174800	861830	1275700	1171800	1643200	794390	0	0	0	0	0				0	6	6	6	55,7	55,7	55,7	15,054	0	55,248	273700000	19	P07737;K7EJ44;I3L3D5;CON__P02584	P07737;K7EJ44;I3L3D5	Profilin-1	PFN1
67652000	123430000	20594000	36926000	70388000	40842000	14395000	12704000	19172000	8726100	8034600	3621200				0	23	12	12	35,7	19,1	19,1	84,659	0	300,54	814500000	106	P07900;G3V2J8;Q14568;Q58FF6;Q58FG0;Q58FG1	P07900	Heat shock protein HSP 90-alpha	HSP90AA1
0	0	0	0	0	2684900	0	0	0	0	0	0				0	1	1	1	3,2	3,2	3,2	45,14	0	28,986	8087000	2	P08185	P08185	Corticosteroid-binding globulin	SERPINA6
364640000	445580000	92933000	123340000	267700000	229460000	57573000	61073000	78166000	27108000	31666000	15914000				0	29	29	13	43,8	43,8	21,4	83,263	0	323,31	4426400000	282	P08238;Q58FF7;F8W026;Q96GW1;A0A1W2PRR1	P08238	Heat shock protein HSP 90-beta	HSP90AB1
0	0	0	0	0	0	0	2355400	0	0	0	0				0	2	2	2	1,3	1,3	1,3	167,55	0	11,859	9738400	2	P08572	P08572	Collagen alpha-2(IV) chain;Canstatin	COL4A2
1340200	2950000	1522600	3691500	1914700	4834000	658890	972870	1418900	0	1073700	0				0	5	5	5	17,8	17,8	17,8	35,936	0	31,987	30504000	13	P08758;D6RBL5;D6RBE9;E9PHT9	P08758;D6RBL5;D6RBE9	Annexin A5;Annexin	ANXA5
21633000	20203000	22847000	9256000	17897000	65449000	23332000	19805000	27960000	12916000	12140000	10384000				0	6	6	6	43,3	43,3	43,3	23,356	0	323,31	438400000	63	P09211;A8MX94;A0A087X243;A0A087X2E9	P09211;A8MX94	Glutathione S-transferase P	GSTP1
4847400	8538400	2625000	1865600	3297100	0	1249500	1286600	2340400	0	2589900	1670700				0	3	2	2	12,6	10,7	10,7	39,455	0	52,106	50622000	6	P09972;K7EKH5;J3KSV6;J3QKP5;A8MVZ9;C9J8F3	P09972;K7EKH5;J3KSV6;J3QKP5;A8MVZ9	Fructose-bisphosphate aldolase C;Fructose-bisphosphate aldolase	ALDOC
0	0	0	0	0	0	0	0	0	0	0	0				0	1	1	1	12,4	12,4	12,4	11,737	0,0028986	6,8526	6652200	1	P10599	P10599	Thioredoxin	TXN
0	0	0	0	0	0	17604000	16491000	20049000	13052000	9299800	11403000				0	5	5	5	15,3	15,3	15,3	40,165	0	46,827	64863000	21	P10915;D6RBS1;D6RC59;D6RAK7;D6RBX9;D6RFI7;D6RG04	P10915	Hyaluronan and proteoglycan link protein 1	HAPLN1
0	0	0	0	0	0	0	0	0	0	0	0				0	1	1	1	2,6	2,6	2,6	72,332	0	7,3235	4752700	1	P11021	P11021	78 kDa glucose-regulated protein	HSPA5
0	0	0	1761700	0	0	0	0	0	0	0	0				0	1	1	1	4,3	4,3	4,3	39,724	0	8,0432	10631000	2	P11766	P11766	Alcohol dehydrogenase class-3	ADH5
2256300	10550000	10909000	4737200	9011600	4014500	1246100	1391900	1830400	0	0	0				0	2	2	2	10	10	10	28,768	0	31,263	66900000	19	P12004	P12004	Proliferating cell nuclear antigen	PCNA
17396	0	0	0	0	0	0	0	0	0	0	0				0	1	1	1	0,8	0,8	0,8	267,29	0,0054645	6,5468	73445	1	P12270	P12270	Nucleoprotein TPR	TPR
1277700	1238200	951780	862030	830180	1115400	972360	0	885610	0	0	0				0	2	2	2	6	6	6	42,644	0	13,699	16805000	7	P12277;G3V461;G3V4N7	P12277;G3V461;G3V4N7	Creatine kinase B-type	CKB
0	0	0	0	0	0	378700	0	0	0	0	0				0	1	1	1	2	2	2	54,548	0	8,1117	6097600	3	P12955	P12955	Xaa-Pro dipeptidase	PEPD
92137000	86285000	68221000	17255000	80655000	13125000	6809400	5933800	5949600	3144200	2289000	2356600				0	17	17	17	23,3	23,3	23,3	95,337	0	140,03	916790000	70	P13639;K7EJ74;K7EP67;Q15029	P13639	Elongation factor 2	EEF2
0	0	0	0	0	2247500	0	0	0	0	0	0				0	3	1	1	3,1	1,4	1,4	92,468	0,0079787	6,4323	23692000	10	P14625	P14625	Endoplasmin	HSP90B1
0	0	0	0	0	4085900	0	0	0	0	0	0				0	2	2	2	5,1	5,1	5,1	35,853	0	10,904	38190000	2	P15121;E9PEF9;E9PCX2;C9JRZ8	P15121;E9PEF9;E9PCX2;C9JRZ8	Aldose reductase;Aldo-keto reductase family 1 member B15	AKR1B1;AKR1B15
0	0	0	0	0	0	0	0	1172700	0	0	0				0	2	1	1	6,5	3	3	40,244	0	9,2898	32611000	5	P48741;P17066;E9PN25;E9PPY6;E9PNE6;Q53FA3;A0A0G2JIW1;P34931;P0DMV9;P0DMV8	P48741;P17066;E9PN25;E9PPY6;E9PNE6;Q53FA3;A0A0G2JIW1;P34931;P0DMV9;P0DMV8	Putative heat shock 70 kDa protein 7;Heat shock 70 kDa protein 6;Heat shock 70 kDa protein 1-like;Heat shock 70 kDa protein 1B;Heat shock 70 kDa protein 1A	HSPA7;HSPA6;HSPA8;HSPA1L;HSPA1B;HSPA1A
0	0	0	0	0	1015200	0	0	0	0	0	0				0	2	2	2	8	8	8	46,247	0	22,308	11546000	3	P17174	P17174	Aspartate aminotransferase, cytoplasmic	GOT1
0	0	0	0	0	0	0	0	709970	0	0	0				0	1	1	1	7,1	7,1	7,1	34,814	0	7,5458	10763000	5	P18065	P18065	Insulin-like growth factor-binding protein 2	IGFBP2
46750000	67121000	76396000	35469000	55717000	7752900	2782500	3306200	5184400	1336300	4051300	0				0	18	18	18	22,2	22,2	22,2	123,8	0	174,55	622130000	90	P18206;A0A096LPE1	P18206	Vinculin	VCL
0	0	0	0	0	0	0	0	458980	0	0	0				0	2	2	2	2,4	2,4	2,4	108,33	0	12,665	3468500	6	P19021;H7BYD9	P19021;H7BYD9	Peptidyl-glycine alpha-amidating monooxygenase;Peptidylglycine alpha-hydroxylating monooxygenase;Peptidyl-alpha-hydroxyglycine alpha-amidating lyase	PAM
16876000	16481000	33054000	4459600	5704300	5159500	3293000	3200000	3162500	2434000	2129300	0				0	10	10	10	17	17	17	76,613	0	98,639	312600000	37	P19338;H7BY16	P19338;H7BY16	Nucleolin	NCL
60212000	144280000	208890000	19514000	25912000	15832000	1691500	5102800	9157500	0	4127000	0				0	28	28	26	16,5	16,5	15,7	276,55	0	236,17	756310000	70	Q5HY54;P21333;A0A087WWY3;Q60FE5;F8WE98;H0Y5C6	Q5HY54;P21333;A0A087WWY3;Q60FE5	Filamin-A	FLNA
1934200	4055300	2024600	2219900	3359000	0	0	0	797050	0	0	0				0	4	4	4	14,1	14,1	14,1	47,079	0	76,206	14310000	10	P22234;D6RF62;E9PBS1	P22234;D6RF62;E9PBS1	Multifunctional protein ADE2;Phosphoribosylaminoimidazole-succinocarboxamide synthase;Phosphoribosylaminoimidazole carboxylase	PAICS
15086000	23817000	22797000	6385200	16800000	3574700	3166700	2290900	3236800	2004000	3266900	2840200				0	11	11	11	16	16	16	117,85	0	202,81	176100000	69	P22314;Q5JRR6;Q5JRS1;Q5JRS3;Q5JRS2;Q5JRR9;Q5JRS0	P22314	Ubiquitin-like modifier-activating enzyme 1	UBA1
0	0	0	0	0	4293500	10591000	13144000	5705500	0	0	0				0	6	6	1	12,7	12,7	3,3	77,213	0	59,136	89122000	17	P23142	P23142	Fibulin-1	FBLN1
0	0	2671800	0	0	0	0	0	0	0	0	0				0	1	1	1	1,6	1,6	1,6	76,149	0,0054496	6,5408	13830000	1	P23246	P23246	Splicing factor, proline- and glutamine-rich	SFPQ
23376000	46741000	27757000	21590000	22363000	6570400	3949600	4181500	4822300	1654300	1733900	1819100				0	7	7	7	18,1	18,1	18,1	47,716	0	51,315	279210000	36	P23526	P23526	Adenosylhomocysteinase	AHCY
20437000	13576000	9195600	8746300	29793000	8439800	4901800	4320200	4485000	3269800	2341200	2455000				0	6	6	6	16,5	16,5	16,5	50,118	0	38,698	216010000	16	P26641	P26641	Elongation factor 1-gamma	EEF1G
0	0	0	0	0	0	0	0	0	0	0	0				0	3	3	3	26,8	26,8	26,8	16,891	0	71,756	58199000	6	P27482	P27482	Calmodulin-like protein 3	CALML3
4038600	0	2879300	0	0	0	0	0	0	0	0	0				0	3	3	3	17	17	17	25,035	0	19,102	43468000	9	P30041	P30041	Peroxiredoxin-6	PRDX6
0	0	0	0	0	1628500	0	0	0	0	0	0				0	2	2	2	6,9	6,9	6,9	56,782	0	13,344	2839000	3	P30101	P30101	Protein disulfide-isomerase A3	PDIA3
0	0	0	0	0	0	1740400	0	0	0	0	0				0	3	3	3	41,6	41,6	41,6	11,471	0	37,821	38443000	6	P31151;Q86SG5	P31151	Protein S100-A7	S100A7
0	0	0	0	0	0	0	0	0	0	0	0				0	2	1	1	13,7	9,7	9,7	27,774	0	7,1753	1234500	1	P31947	P31947	14-3-3 protein sigma	SFN
0	0	0	0	0	0	0	0	12132000	0	0	0				0	1	1	1	2	2	2	67,93	0	19,265	101280000	19	P32455	P32455	Interferon-induced guanylate-binding protein 1	GBP1
0	0	0	0	0	0	0	0	0	0	0	0				0	2	2	1	3,6	3,6	1	81,307	0	11,931	2786200	2	P33993	P33993	DNA replication licensing factor MCM7	MCM7
7134900	17205000	19231000	6768700	11135000	4167100	5716600	3131600	2557100	5610900	1678800	2323800				0	9	9	9	14,9	14,9	14,9	94,33	0	162,13	118320000	43	P34932;A0A087WTS8;A0A087WYC1	P34932;A0A087WTS8;A0A087WYC1	Heat shock 70 kDa protein 4	HSPA4
1766600	0	0	0	0	0	0	0	0	0	0	0				0	3	3	3	2	2	2	226,53	0	18,517	27398000	2	P35579;A0A0C4DFM8;A1L2Z2;P35749;P35580;Q7Z406	P35579	Myosin-9	MYH9
0	0	0	0	0	0	0	0	0	0	0	0				0	1	1	1	6,4	6,4	6,4	21,086	0	10,411	4853900	1	X6RJP6;P37802	X6RJP6;P37802	Transgelin-2	TAGLN2
0	0	0	0	0	0	0	1600900	0	0	0	0				0	2	2	2	6,9	6,9	6,9	36,426	0	10,875	23667000	3	P40925;C9JLV6;C9JRL4;B8ZZ51;B9A041;C9JF79	P40925;C9JLV6;C9JRL4;B8ZZ51;B9A041;C9JF79	Malate dehydrogenase, cytoplasmic;Malate dehydrogenase	MDH1
1037300	0	0	0	0	0	0	0	5051700	0	4963800	0				0	2	2	2	4,2	4,2	4,2	61,132	0	12,421	33021000	5	P43251	P43251	Biotinidase	BTD
807210	0	0	0	0	0	0	0	0	0	0	0				0	1	1	1	13,8	13,8	13,8	14,114	0	16,916	4682900	4	Q5T7N0;P46777	Q5T7N0;P46777	60S ribosomal protein L5	RPL5
0	0	0	0	0	0	0	0	0	0	0	0				0	5	5	5	54,4	54,4	54,4	15,075	0	37,239	267370000	8	P47929	P47929	Galectin-7	LGALS7
0	0	0	0	0	0	0	0	0	0	0	0				0	2	2	2	3,2	3,2	3,2	101,89	0	10,753	9125800	2	P49736;H0Y8E6	P49736;H0Y8E6	DNA replication licensing factor MCM2	MCM2
12205000	21775000	18567000	12429000	24828000	11496000	4276000	5221600	6545600	3543000	4515900	3430600				0	9	9	9	23,1	23,1	23,1	50,663	0	81,64	178270000	44	P50395;Q5SX87;V9GYJ7;V9GYF8;Q5SX90;Q5SX86;Q5SX91;P31150	P50395;Q5SX87	Rab GDP dissociation inhibitor beta	GDI2
11241000	16039000	6334600	9407800	12702000	7781800	4970300	5819400	6912400	0	0	0				0	6	6	6	21	21	21	42,403	0	126,37	103330000	14	P50453;P50452;H7BXK7;C9J7N5;A0A1B0GU38;A0A0C4DGW9;P30740;O75830	P50453	Serpin B9	SERPINB9
8451400	12299000	15833000	12423000	11390000	10589000	0	0	0	0	0	0				0	5	5	5	14,8	14,8	14,8	46,44	0	33,882	148690000	17	P50454;E9PKH2;H0YEP8;E9PR70;E9PPV6;E9PQ34;E9PJH8;E9PIG2;E9PRS3;E9PNX1;E9PK86;E9PMI5	P50454;E9PKH2	Serpin H1	SERPINH1
1517900	1713200	1435200	0	0	1545600	0	0	0	0	0	0				0	3	3	3	7,9	7,9	7,9	57,861	0	18,852	20502000	8	P52292;J3QLL0;J3KS65	P52292	Importin subunit alpha-1	KPNA2
0	0	0	0	0	440400	0	0	0	0	0	0				0	2	2	2	9,1	9,1	9,1	42,966	0	11,716	4918000	3	P54687;F5H2F2;A0A087WYF2	P54687;F5H2F2;A0A087WYF2	Branched-chain-amino-acid aminotransferase, cytosolic	BCAT1
2739900	0	2295500	0	2124600	0	0	0	1183300	0	0	0				0	4	4	4	6	6	6	110,42	0	26,161	30461000	10	P55060	P55060	Exportin-2	CSE1L
28353000	8760500	26634000	4934100	6148900	3844300	1280300	1733100	2169300	2056200	1426100	912770				0	16	16	16	29,4	29,4	29,4	89,321	0	191,21	293430000	54	P55072;C9JUP7;C9IZA5	P55072	Transitional endoplasmic reticulum ATPase	VCP
9105500	8920200	6796400	5143800	12812000	28971000	9335100	12919000	35259000	7927000	8470300	11146000				0	7	7	7	39,2	39,2	39,2	30,791	0	47,283	199190000	31	P60174;U3KQF3;U3KPZ0;U3KPS5	P60174	Triosephosphate isomerase	TPI1
0	1521900	1492100	0	0	1099000	1093600	1179300	4245400	1031500	1174300	0				0	2	2	2	7,7	7,7	7,7	41,807	0	13,873	14725000	8	Q5T6W2;P61978	Q5T6W2;P61978	Heterogeneous nuclear ribonucleoprotein K	HNRNPK
0	9798800	4127800	2235500	0	1458300	0	0	0	0	0	0				0	2	2	2	14,9	14,9	14,9	21,879	0	86,551	32299000	6	Q5JR95;P62241	Q5JR95;P62241	40S ribosomal protein S8	RPS8
5135400	7358900	5328100	2214000	6412300	13593000	4759600	6026000	12984000	3900100	5385500	3568800				0	7	6	6	34,9	31	31	29,174	0	46,091	74499000	31	P62258;K7EM20;B4DJF2;I3L3T1;K7EIT4;I3L0W5	P62258	14-3-3 protein epsilon	YWHAE
0	0	0	0	0	0	0	0	0	0	0	0				0	1	1	1	8,6	8,6	8,6	16,273	0	7,1295	9749700	4	P62263	P62263	40S ribosomal protein S14	RPS14
0	0	0	0	0	0	0	0	0	0	0	0				0	1	1	1	7,7	7,7	7,7	15,807	0	14,518	4839300	2	P62266	P62266	40S ribosomal protein S23	RPS23
8394800	10561000	7375100	4173000	7451000	6046000	0	0	0	0	0	0				0	6	6	6	21,3	21,3	21,3	29,597	0	37,92	98558000	25	P62701;C9JEH7;Q8TD47;P22090	P62701	40S ribosomal protein S4, X isoform	RPS4X
3873100	0	0	0	0	0	0	0	0	0	0	0				0	3	3	3	16,1	16,1	16,1	24,831	0	18,382	43176000	6	P62906	P62906	60S ribosomal protein L10a	RPL10A
3268000	0	0	0	0	0	0	0	0	0	0	0				0	2	2	2	12,9	12,9	12,9	20,252	0	12,821	27812000	6	P62913;Q5VVC9;Q5VVC8	P62913;Q5VVC9;Q5VVC8	60S ribosomal protein L11	RPL11
11682000	957680	1251900	1460000	1864600	1334900	1344000	0	0	0	0	0				0	7	7	7	46,7	46,7	46,7	18,012	0	48,712	146230000	15	P62937;F8WE65;C9J5S7;E5RIZ5;Q9Y536	P62937;F8WE65;C9J5S7	Peptidyl-prolyl cis-trans isomerase A;Peptidyl-prolyl cis-trans isomerase A, N-terminally processed;Peptidyl-prolyl cis-trans isomerase	PPIA
11102000	11525000	9571400	4440300	11207000	27135000	10626000	18006000	26505000	9769300	11242000	8550600				0	9	9	8	46,9	46,9	42,9	27,745	0	135,18	277910000	99	P63104;E7EX29;B0AZS6;B7Z2E6;H0YB80;E7ESK7;E5RGE1;E5RIR4;E9PD24;E7EVZ2;P27348;P31946;Q04917;P61981	P63104;E7EX29;B0AZS6;B7Z2E6;H0YB80	14-3-3 protein zeta/delta	YWHAZ
0	0	0	0	0	0	0	0	0	6433200	0	0				0	11	2	2	30,8	6,9	6,9	42,051	0	13,544	126000000	15	P68133;P68032;P63267;P62736;A6NL76;C9JFL5;F6UVQ4;F6QUT6;C9JTX5;F8WB63;B8ZZJ2	P68133;P68032;P63267;P62736;A6NL76;C9JFL5;F6UVQ4;F6QUT6	Actin, alpha skeletal muscle;Actin, alpha cardiac muscle 1;Actin, gamma-enteric smooth muscle;Actin, aortic smooth muscle	ACTA1;ACTC1;ACTG2;ACTA2
91328000	164040000	122700000	108490000	159620000	82360000	31358000	40418000	46894000	12171000	12859000	10024000				0	9	9	9	26,2	26,2	26,2	50,184	0	115,51	1646100000	138	Q5VTE0;P68104;A0A087WVQ9;A0A087WV01;Q05639;A6PW80;Q5JR01	Q5VTE0;P68104;A0A087WVQ9;A0A087WV01;Q05639	Putative elongation factor 1-alpha-like 3;Elongation factor 1-alpha 1;Elongation factor 1-alpha;Elongation factor 1-alpha 2	EEF1A1P5;EEF1A1;EEF1A2
0	0	0	0	0	474430	0	0	0	0	0	0				0	10	1	0	31,9	3,8	0	49,83	0	7,7432	3091100	1	P68371	P68371	Tubulin beta-4B chain	TUBB4B
0	0	0	0	0	913140	1741900	2915000	1703100	1081600	1212600	1106900				0	2	2	2	3,2	3,2	3,2	126,57	0	15,985	9386900	6	P98095	P98095	Fibulin-2	FBLN2
0	0	0	0	0	0	4436800	5430300	2443800	80297000	76392000	43653000				0	16	16	16	6,1	6,1	6,1	468,83	0	106,17	99287000	50	P98160;A0A0U1RQT3	P98160	Basement membrane-specific heparan sulfate proteoglycan core protein;Endorepellin;LG3 peptide	HSPG2
0	0	0	0	0	0	0	0	1477900	0	0	0				0	1	1	1	3	3	3	38,725	0,0080645	6,4714	5788200	0	Q01664	Q01664	Transcription factor AP-4	TFAP4
35628000	86396000	95356000	36131000	36517000	82193000	4280400	2348000	0	0	0	0				0	8	8	7	44,2	44,2	38,7	22,11	0	55,657	731230000	71	Q06830;A0A0A0MSI0;A0A0A0MRQ5;H7C3T4;Q13162	Q06830;A0A0A0MSI0;A0A0A0MRQ5	Peroxiredoxin-1	PRDX1
0	0	0	0	0	0	0	3813600	0	0	0	0				0	1	1	1	1,7	1,7	1,7	99,986	0	7,1521	19617000	3	Q08554	Q08554	Desmocollin-1	DSC1
0	3510300	5601500	14841000	16613000	8025400	40733000	45039000	20509000	15612000	37560000	17099000				0	4	4	4	12,7	12,7	12,7	34,985	0	50,503	185840000	27	Q12841;C9J5G4	Q12841	Follistatin-related protein 1	FSTL1
0	0	0	0	0	0	0	0	0	0	0	0				0	2	2	2	2,9	2,9	2,9	88,549	0	13,906	7067700	3	Q13263;M0R3C0;M0R0K9	Q13263;M0R3C0;M0R0K9	Transcription intermediary factor 1-beta	TRIM28
0	0	0	0	0	3086600	0	0	0	0	0	0				0	10	1	1	32,6	2	2	49,953	0	8,3101	6982000	3	Q9BVA1;Q13885	Q9BVA1;Q13885	Tubulin beta-2B chain;Tubulin beta-2A chain	TUBB2B;TUBB2A
0	0	0	0	0	0	8182600	10905000	2195300	4339100	5598400	4256800				0	4	4	3	5	5	4,3	151,25	0	109,69	28886000	13	Q14112;A0A087WZP6;H0YJV3	Q14112;A0A087WZP6;H0YJV3	Nidogen-2	NID2
479430	0	0	499830	636400	980460	3076500	2348700	1233200	1129900	1034700	748150				0	3	3	3	3,6	3,6	3,6	122,29	0	18,376	16474000	6	Q14126;J3KSI6	Q14126;J3KSI6	Desmoglein-2	DSG2
5709700	5142400	13779000	2773900	3756500	3586800	0	0	3644600	3482900	2315500	3080800				0	9	7	6	4,4	3,7	3,1	291,02	0	51,855	72351000	16	Q14315	Q14315	Filamin-C	FLNC
6974200	6445800	4880900	4262900	4194200	2006100	0	1623200	1606400	0	1216100	705330				0	8	8	8	13,1	13,1	13,1	97,169	0	208,34	81141000	44	Q14974;J3KTM9;J3QR48;J3QRG4	Q14974;J3KTM9	Importin subunit beta-1	KPNB1
0	0	0	0	0	0	0	0	241080	0	0	0				0	1	1	1	3,2	3,2	3,2	48,121	0,0028169	6,7184	1981600	1	Q15084	Q15084	Protein disulfide-isomerase A6	PDIA6
0	0	0	0	0	0	0	0	976370	0	0	0				0	1	1	1	3,7	3,7	3,7	37,497	0,0028818	6,8061	2300900	2	Q15365	Q15365	Poly(rC)-binding protein 1	PCBP1
1535700	0	0	0	0	0	0	0	0	0	0	0				0	2	2	2	2,5	2,5	2,5	135,58	0	14,095	21916000	3	Q15393	Q15393	Splicing factor 3B subunit 3	SF3B3
0	0	0	0	0	0	0	0	0	0	0	0				0	4	4	4	41,6	41,6	41,6	16,511	0	34,57	121040000	4	Q15828	Q15828	Cystatin-M	CST6
0	0	0	0	0	13250000	0	1364500	0	0	0	0				0	2	2	2	5,3	5,3	5,3	54,529	0	15,609	35635000	5	Q16658;C9JPH9;C9JFC0;A0A0A0MSB2	Q16658;C9JPH9;C9JFC0;A0A0A0MSB2	Fascin	FSCN1
0	0	0	0	0	0	0	10883000	0	0	0	0				0	2	2	2	1,7	1,7	1,7	189,97	0	12,143	63175000	2	Q2KHR3;H0YCQ7	Q2KHR3;H0YCQ7	Glutamine and serine-rich protein 1	QSER1
0	0	0	0	0	0	30549000	0	0	0	0	0				0	4	1	1	14,1	4,8	4,8	42,003	0	8,2554	549990000	11	Q562R1	Q562R1	Beta-actin-like protein 2	ACTBL2
14172000	8962000	2661600	2838800	3536700	3384600	0	0	0	0	0	0				0	8	1	1	20,2	3,9	3,9	44,348	0	7,5055	108260000	25	Q58FF8	Q58FF8	Putative heat shock protein HSP 90-beta 2	HSP90AB2P
0	0	0	0	0	0	0	0	108600000	0	0	0				0	1	1	1	3,2	3,2	3,2	38,318	0	7,3395	1919200000	63	Q5STZ8;Q8NE71	Q5STZ8;Q8NE71	ATP-binding cassette sub-family F member 1	ABCF1
0	0	0	0	0	0	0	1268800	0	0	0	0				0	1	1	1	2,3	2,3	2,3	59,582	0	7,2769	10518000	16	Q6UX71	Q6UX71	Plexin domain-containing protein 2	PLXDC2
3488600	2645100	2396300	2349000	1999100	0	0	0	0	0	0	0				0	7	7	7	7,8	7,8	7,8	136,37	0	43,169	37459000	15	Q86VP6;A0A0C4DGH5	Q86VP6;A0A0C4DGH5	Cullin-associated NEDD8-dissociated protein 1	CAND1
0	0	0	0	0	0	0	0	1007400000	0	0	0				0	2	2	2	0,5	0,5	0,5	461,15	0	10,921	3035400000	2	Q8WXX0	Q8WXX0	Dynein heavy chain 7, axonemal	DNAH7
0	0	0	0	0	0	0	873540	971950	0	0	5574500				0	2	2	2	4	4	4	51,286	0	14,293	5683300	4	Q92743;H0Y7G9	Q92743;H0Y7G9	Serine protease HTRA1	HTRA1
0	0	0	0	0	0	0	166170000	0	0	0	0				0	2	2	2	1,3	1,3	1,3	215,31	0	12,12	747170000	3	Q9H7D0;H0Y7N4	Q9H7D0;H0Y7N4	Dedicator of cytokinesis protein 5	DOCK5
0	0	0	0	0	0	0	0	0	0	0	0				0	2	2	2	20,5	20,5	20,5	15,892	0	29,966	23166000	5	Q9NZT1	Q9NZT1	Calmodulin-like protein 5	CALML5
10241000	31494000	13404000	6340800	17180000	3536900	2057900	0	3519200	0	0	2562400				0	8	8	8	15,3	15,3	15,3	56,084	0	57,843	161880000	27	Q9P258	Q9P258	Protein RCC2	RCC2
0	0	0	0	207450	0	0	0	0	0	0	0				0	1	1	1	1	1	1	134,46	0	7,3877	2353700	3	Q9P2J5	Q9P2J5	Leucine--tRNA ligase, cytoplasmic	LARS
0	0	0	0	0	0	0	0	1002000	0	0	0				0	1	1	1	4,5	4,5	4,5	38,256	0,0079156	6,4109	11948000	1	Q9P2W7	Q9P2W7	Galactosylgalactosylxylosylprotein 3-beta-glucuronosyltransferase 1	B3GAT1
0	0	0	0	0	0	0	0	0	0	0	0				0	1	1	1	1,8	1,8	1,8	72,313	0,0080429	6,471	0	1	Q9UNQ0	Q9UNQ0	ATP-binding cassette sub-family G member 2	ABCG2
3670200	2578200	2406900	1957800	2303700	1540300	926030	0	1647900	0	0	0				0	2	2	2	6,1	6,1	6,1	43,786	0	14,511	33171000	6	Q9UQ80;F8VR77	Q9UQ80;F8VR77	Proliferation-associated protein 2G4	PA2G4
22057000	47748000	31613000	10367000	13911000	9422600	1760000	2240700	1965500	0	0	0				0	8	8	8	21,9	21,9	21,9	40,422	0	134,86	225990000	53	Q9Y617	Q9Y617	Phosphoserine aminotransferase	PSAT1

## Sheet: Planilha3
CMd1_1	CMd1_2	CMd1_3	CMd4_1	CMd4_2	CMd4_3	CMd8_1	CMd8_2	CMd8_3	CMd15_1	CMd15_2	CMd15_3	Only identified by site	Reverse	Potential contaminant	nCM	Peptides	Razor + unique peptides	Unique peptides	Sequence coverage [%]	Unique + razor sequence coverage [%]	Unique sequence coverage [%]	Mol. weight [kDa]	Q-value	Score	Intensity	MS/MS count	Protein IDs	Majority protein IDs	Protein names	Gene names
#!{Type}E	E	E	E	E	E	E	E	E	E	E	E	C	C	C	C	N	N	N	N	N	N	N	N	N	N	N	T	T	T	T
#!{C:CM/day}CMd1	CMd1	CMd1	CMd4	CMd4	CMd4	CMd8	CMd8	CMd8	CMd15	CMd15	CMd15
20.2953567504883	NaN	NaN	19.9563140869141	NaN	19.7121467590332	NaN	NaN	NaN	NaN	NaN	NaN				0	3	3	3	10,3	10,3	10,3	29,836	0	20,971	35010000	6	A0A087WUI2;P22626	A0A087WUI2;P22626	Heterogeneous nuclear ribonucleoproteins A2/B1	HNRNPA2B1
24.4512367248535	23.1559944152832	22.6221199035645	21.0363750457764	21.7849655151367	21.0020275115967	20.653247833252	19.7518901824951	20.1698665618896	NaN	20.2624702453613	19.7154197692871				0	14	14	14	11,9	11,9	11,9	192,06	0	129,63	129410000	33	A0A087WVQ6;Q00610;J3KS13;A0A087WX41;P53675;J3KRF5;K7EJJ5;J3KSQ2;F5H5N6	A0A087WVQ6;Q00610	Clathrin heavy chain;Clathrin heavy chain 1	CLTC
22.4157848358154	25.5781631469727	22.5140514373779	22.2501163482666	22.6505336761475	22.3418273925781	NaN	NaN	NaN	NaN	NaN	NaN				0	6	6	6	16,7	16,7	16,7	56,967	0	46,327	87911000	16	A0A087WYS1;E7EUC7;Q16851;C9JVG3;C9JQU9;C9JNZ1;C9JWG0;C9JTZ5;C9JUW1	A0A087WYS1;E7EUC7;Q16851;C9JVG3;C9JQU9;C9JNZ1	UTP--glucose-1-phosphate uridylyltransferase	UGP2
21.6070232391357	22.5935688018799	NaN	NaN	NaN	21.8502597808838	NaN	NaN	NaN	NaN	NaN	NaN				0	2	2	2	11,2	11,2	11,2	25,041	0	12,976	50499000	3	A0A087WYS6;O14818;Q8TAA3;H0Y586	A0A087WYS6;O14818;Q8TAA3;H0Y586	Proteasome subunit alpha type-7;Proteasome subunit alpha type-7-like	PSMA8;PSMA7
NaN	22.74831199646	22.1645660400391	25.7771587371826	24.6907253265381	24.1656875610352	26.2883281707764	26.1726837158203	25.5389575958252	25.0883293151855	25.3946018218994	24.9652118682861				0	10	10	10	13,4	13,4	13,4	108,34	0	96,348	383530000	59	A0A087X0S5;P12109	A0A087X0S5;P12109	Collagen alpha-1(VI) chain	COL6A1
23.3439445495605	22.5541934967041	22.8206520080566	21.5783767700195	21.5287418365479	NaN	NaN	NaN	NaN	20.4380683898926	NaN	NaN				0	3	3	3	13,2	13,2	13,2	31,124	0	92,021	138680000	20	A0A0C4DFV9;Q01105;A0A087X027;P0DME0	A0A0C4DFV9;Q01105;A0A087X027;P0DME0	Protein SET;Protein SETSIP	SET;SETSIP
22.2425479888916	22.1990451812744	23.4226512908936	21.6263599395752	22.4471797943115	22.8093318939209	21.0834922790527	21.5369205474854	21.9691619873047	20.6942157745361	21.2779293060303	21.0937786102295				0	5	5	5	26,2	26,2	26,2	29,404	0	33,775	96314000	17	C9J9K3;A0A0C4DG17;P08865;F8WD59	C9J9K3;A0A0C4DG17;P08865;F8WD59	40S ribosomal protein SA	RPSA
NaN	NaN	NaN	NaN	NaN	22.4644088745117	22.3613185882568	22.5681114196777	NaN	NaN	NaN	NaN				0	2	2	2	4,6	4,6	4,6	65,769	0	13,622	35676000	6	A0A0G2JH38;E7ETN3;B4E1Z4;P00751;H7C5H1	A0A0G2JH38;E7ETN3;B4E1Z4;P00751;H7C5H1	Complement factor B;Complement factor B Ba fragment;Complement factor B Bb fragment	CFB
20.638032913208	23.9993801116943	21.4653816223145	NaN	20.8353004455566	20.5186462402344	19.8827095031738	19.895751953125	NaN	NaN	NaN	NaN				0	4	4	4	14,3	14,3	14,3	38,125	0	43,144	41657000	8	A0A0G2JJZ9;Q13838;H0Y400;A0A140T9X3;Q5STU3;O00148;A0A140T9X9;A0A140T996;F6UJC5;A0A140TA18;F6WLT2;A0A140T9K2;A0A140T9N3;A0A140T9L4;A0A140T973;A0A140T9K1;H0YCC6;F6QYI9;A0A0G2JJL7;F6R6M7;F6S4E6;A0A0A0MT12;F6TRA5	A0A0G2JJZ9;Q13838;H0Y400;A0A140T9X3;Q5STU3;O00148;A0A140T9X9;A0A140T996;F6UJC5;A0A140TA18;F6WLT2	Spliceosome RNA helicase DDX39B;ATP-dependent RNA helicase DDX39A	DDX39B;DDX39A
22.6383209228516	21.8470134735107	23.928861618042	21.2775897979736	22.2624702453613	20.7399940490723	20.0247230529785	19.5633525848389	20.4430370330811	19.5680751800537	19.7183990478516	NaN				0	8	8	8	5	5	5	273,2	0	54,745	94344000	28	A0A0U1RQF0;P49327	A0A0U1RQF0;P49327	Fatty acid synthase;[Acyl-carrier-protein] S-acetyltransferase;[Acyl-carrier-protein] S-malonyltransferase;3-oxoacyl-[acyl-carrier-protein] synthase;3-oxoacyl-[acyl-carrier-protein] reductase;3-hydroxyacyl-[acyl-carrier-protein] dehydratase;Enoyl-[acyl-carrier-protein] reductase;Oleoyl-[acyl-carrier-protein] hydrolase	FASN
22.3265209197998	25.3211345672607	25.4643211364746	25.3443508148193	22.4048099517822	21.3647956848145	22.3264122009277	21.6799430847168	21.464183807373	22.1080837249756	22.1499462127686	21.9622936248779				0	3	3	3	20,7	20,7	20,7	18,481	0	24,299	184080000	29	A0A0U1RR32;A0A0U1RRH7;Q99878;Q96KK5;Q9BTM1;Q16777;Q93077;Q7L7L0;Q6FI13;P20671;P0C0S8;P04908;H0YFX9;C9J0D1;Q71UI9;P0C0S5;Q96QV6;P16104;C9J386;Q8IUE6	A0A0U1RR32;A0A0U1RRH7;Q99878;Q96KK5;Q9BTM1;Q16777;Q93077;Q7L7L0;Q6FI13;P20671;P0C0S8;P04908;H0YFX9;C9J0D1;Q71UI9;P0C0S5;Q96QV6;P16104	Histone H2A type 1-J;Histone H2A type 1-H;Histone H2A.J;Histone H2A type 2-C;Histone H2A type 1-C;Histone H2A type 3;Histone H2A type 2-A;Histone H2A type 1-D;Histone H2A type 1;Histone H2A type 1-B/E;Histone H2A;Histone H2A.V;Histone H2A.Z;Histone H2A type 1-A;Histone H2AX	HIST1H2AJ;HIST1H2AH;H2AFJ;HIST2H2AC;HIST1H2AC;HIST3H2A;HIST2H2AA3;HIST1H2AD;HIST1H2AG;HIST1H2AB;H2AFV;H2AFZ;HIST1H2AA;H2AFX
NaN	NaN	NaN	NaN	NaN	29.9460067749023	30.1361389160156	30.2073440551758	30.7542190551758	30.9351558685303	30.2818450927734	NaN				0	1	1	1	2,2	2,2	2,2	57,183	0,0080214	6,4613	11509000000	12	B3KTU7;Q9BSJ2	B3KTU7;Q9BSJ2	Gamma-tubulin complex component 2	TUBGCP2
21.0953254699707	20.5459480285645	NaN	20.5561847686768	20.6427116394043	21.9244823455811	NaN	NaN	NaN	NaN	20.3451633453369	NaN				0	5	5	5	15,1	15,1	15,1	49,897	0	32,906	32296000	6	B4DNK4;P14618;H3BTN5;H3BQ34;H3BR70	B4DNK4;P14618;H3BTN5;H3BQ34;H3BR70	Pyruvate kinase;Pyruvate kinase PKM	PKM
22.7285614013672	24.9257869720459	24.6366062164307	23.7643566131592	24.7488842010498	21.8388824462891	21.7088508605957	21.5313625335693	23.4058742523193	21.6719341278076	21.8612461090088	22.2782135009766				0	4	4	4	15,6	15,6	15,6	38,91	0	68,397	186440000	35	B4DY09;Q12905;X6R6Z1;A0A0A0MRL0	B4DY09;Q12905;X6R6Z1	Interleukin enhancer-binding factor 2	ILF2
23.8990135192871	25.3178272247314	24.988151550293	22.4267520904541	21.7506637573242	22.5556926727295	21.4041080474854	21.661491394043	21.7457084655762	20.3425617218018	NaN	20.3462448120117				0	5	5	5	33,3	33,3	33,3	22,436	0	89,257	193470000	22	F5H018;B5MDF5;J3KQE5;P62826;B4DV51;H0YFC6	F5H018;B5MDF5;J3KQE5;P62826;B4DV51	GTP-binding nuclear protein Ran	RAN
22.0358371734619	20.5259265899658	20.7640132904053	19.7414932250977	20.8631000518799	20.3360366821289	19.3646354675293	19.4866390228271	20.4613399505615	19.2473907470703	19.5502967834473	19.2796649932861				0	2	2	2	7,9	7,9	7,9	30,302	0	28,405	40989000	16	D6R9P3;D6RD18;D6RBZ0;Q99729	D6R9P3;D6RD18;D6RBZ0;Q99729	Heterogeneous nuclear ribonucleoprotein A/B	HNRNPAB
23.7226524353027	23.4974098205566	23.8152866363525	22.8873271942139	23.7383041381836	22.3078308105469	21.9575901031494	21.9351348876953	23.5374183654785	21.6681308746338	22.6085357666016	21.6676540374756				0	4	4	4	22,6	22,6	22,6	23,076	0	69,195	177530000	46	D6RAF8;Q14103;D6RF44;H0YA96;H0Y8G5;D6RD83;D6RBQ9;A0A087WUK2;O14979	D6RAF8;Q14103;D6RF44;H0YA96;H0Y8G5;D6RD83;D6RBQ9	Heterogeneous nuclear ribonucleoprotein D0	HNRNPD
20.6269397735596	20.3524017333984	NaN	21.3958187103271	NaN	23.3447570800781	20.6407718658447	20.9880828857422	NaN	NaN	NaN	NaN				0	2	2	2	24,1	24,1	24,1	9,4069	0	15,713	52342000	30	E5RJF6;E5RJI8;E5RH81;H0YBE2;E5RFE7;E5RHP7;P00915;E5RG81	E5RJF6;E5RJI8;E5RH81;H0YBE2;E5RFE7;E5RHP7;P00915;E5RG81	Carbonic anhydrase 1	CA1
23.3106346130371	21.9406299591064	22.1046962738037	22.3344268798828	22.3729724884033	23.6934928894043	20.2810478210449	20.1526412963867	NaN	19.3547916412354	19.6489200592041	19.6587657928467				0	6	6	6	9,7	9,7	9,7	69,371	0	52,143	96286000	21	E7EQR4;P15311;P26038;P35241;V9GZ54;E9PQ82;E9PNV3	E7EQR4;P15311;P26038;P35241	Ezrin;Moesin;Radixin	EZR;MSN;RDX
19.7428417205811	NaN	19.3584022521973	NaN	19.0500602722168	NaN	NaN	NaN	NaN	NaN	NaN	NaN				0	3	3	3	11,4	11,4	11,4	37,709	0	17,078	7521500	3	E9PKG1;Q99873;E9PIX6;E9PNR9;E9PQ98;H0YDE4	E9PKG1;Q99873;E9PIX6	Protein arginine N-methyltransferase 1	PRMT1
22.6736602783203	22.8990325927734	22.6955108642578	22.0074100494385	22.501594543457	NaN	NaN	NaN	NaN	NaN	NaN	NaN				0	4	4	4	21,6	21,6	21,6	25,371	0	26,535	61611000	11	E9PL09;P23396;E9PPU1;H0YEU2;F2Z2S8;H0YF32;H0YCJ7;E9PQ96;E9PSF4;E9PJH4;E9PK82	E9PL09;P23396;E9PPU1;H0YEU2;F2Z2S8;H0YF32;H0YCJ7	40S ribosomal protein S3	RPS3
22.9498825073242	22.4471035003662	22.9205074310303	22.5093002319336	22.9829235076904	22.4959716796875	22.2933654785156	NaN	NaN	21.9379386901855	22.2829151153564	21.9271621704102				0	4	4	4	5,1	5,1	5,1	102,99	0	24,108	115490000	8	E9PLK3;P55786;A6NEC2;H0YCQ5;E9PJ74;H0YDG0;E9PRQ5	E9PLK3;P55786;A6NEC2	Puromycin-sensitive aminopeptidase;Puromycin-sensitive aminopeptidase-like protein	NPEPPS;NPEPPSL1
21.5523433685303	21.5831604003906	21.4406051635742	23.2987995147705	23.645263671875	22.7791042327881	25.6943168640137	26.0580863952637	25.4770736694336	22.5484428405762	23.2183322906494	22.8948574066162				0	5	5	5	28,9	28,9	28,9	17,47	0	68,465	217630000	30	F5GY03;P09486;E5RK62	F5GY03;P09486;E5RK62	SPARC	SPARC
18.4894237518311	17.7941112518311	18.3810195922852	17.8900032043457	17.7757778167725	NaN	NaN	NaN	NaN	NaN	NaN	NaN				0	2	2	2	4,3	4,3	4,3	64,872	0	12,26	7355900	2	F5GZS6;J3KPF3;P08195;H0YFX4;F5GZI0	F5GZS6;J3KPF3;P08195;H0YFX4;F5GZI0	4F2 cell-surface antigen heavy chain	SLC3A2
NaN	22.2242622375488	21.9863128662109	NaN	NaN	NaN	NaN	NaN	NaN	NaN	NaN	NaN				0	4	4	4	4,5	4,5	4,5	110,61	0	32,389	20389000	5	F5H2F4;P11586;V9GYY3	F5H2F4;P11586	C-1-tetrahydrofolate synthase, cytoplasmic;Methylenetetrahydrofolate dehydrogenase;Methenyltetrahydrofolate cyclohydrolase;Formyltetrahydrofolate synthetase;C-1-tetrahydrofolate synthase, cytoplasmic, N-terminally processed	MTHFD1
23.933910369873	23.2616958618164	21.7758731842041	22.4675712585449	22.4394130706787	24.7491397857666	20.7521362304688	21.2374229431152	21.0016136169434	20.9728107452393	NaN	20.1879749298096				0	10	10	5	24,3	24,3	13,5	57,73	0	75,236	245730000	43	F5H5D3;Q9BQE3;Q71U36;P68363;A0A1W2PQM2;Q13748;Q6PEY2;F8VVB9;C9J2C0;P68366;V9GZ17;F8VRZ4;F8VS66;F8VQQ4;F8VRK0;F8VX09;F8VWV9;C9JDS9;A6NHL2;F8VXZ7;F8W0F6;Q9H853	F5H5D3;Q9BQE3;Q71U36;P68363;A0A1W2PQM2;Q13748;Q6PEY2;F8VVB9;C9J2C0;P68366	Tubulin alpha-1C chain;Tubulin alpha-1A chain;Tubulin alpha-1B chain;Tubulin alpha-3C/D chain;Tubulin alpha-3E chain;Tubulin alpha-4A chain	TUBA1C;TUBA1A;TUBA1B;TUBA3C;TUBA3E;TUBA8;TUBA4A
23.6727123260498	23.5723056793213	22.2982959747314	21.1749324798584	22.0246887207031	21.898551940918	21.0851154327393	20.810567855835	21.0911979675293	NaN	20.5108451843262	NaN				0	5	5	5	42,1	42,1	42,1	16,536	0	32,315	153690000	19	F8VTQ5;F8W6I7;P09651;F8VZ49;Q32P51;F8VYN5;F8W646;H0YH80	F8VTQ5;F8W6I7;P09651;F8VZ49;Q32P51	Heterogeneous nuclear ribonucleoprotein A1;Heterogeneous nuclear ribonucleoprotein A1, N-terminally processed;Heterogeneous nuclear ribonucleoprotein A1-like 2	HNRNPA1;HNRNPA1L2
21.0460681915283	21.6786975860596	21.4005680084229	NaN	21.2321014404297	22.2063674926758	20.8818874359131	20.9479942321777	20.8971862792969	20.4849281311035	NaN	NaN				0	4	4	4	17,8	17,8	17,8	27,187	0	28,001	49120000	13	F8VU65;P05388;F8VPE8;G3V210;F8VW21;F8VWS0;Q8NHW5;F8VS58;F8VQY6;F8VRK7;F8VZS0;F8VWV4	F8VU65;P05388;F8VPE8;G3V210;F8VW21;F8VWS0;Q8NHW5;F8VS58;F8VQY6;F8VRK7;F8VZS0	60S acidic ribosomal protein P0;60S acidic ribosomal protein P0-like	RPLP0;RPLP0P6
22.5844917297363	20.6390933990479	20.8283443450928	20.5993251800537	20.9738636016846	20.5280265808105	NaN	NaN	20.5556221008301	NaN	NaN	NaN				0	5	5	5	5,6	5,6	5,6	123,75	0	29,328	34927000	7	H0Y8C6;O00410	H0Y8C6;O00410	Importin-5	IPO5
NaN	22.2937297821045	23.3181037902832	22.6728420257568	23.5577735900879	21.783088684082	NaN	NaN	NaN	NaN	NaN	NaN				0	3	3	3	19,7	19,7	19,7	21,934	0	22,513	55952000	10	H0YAF8;J3KPE3;H0Y8W2;P63244;D6RAU2;E9PD14;D6RFX4;D6RFZ9;D6RHH4;D6R9Z1;H0YAM7;D6R9L0;H0Y9P0;D6RF23;D6RAC2;D6REE5	H0YAF8;J3KPE3;H0Y8W2;P63244;D6RAU2;E9PD14;D6RFX4;D6RFZ9;D6RHH4;D6R9Z1;H0YAM7;D6R9L0	Guanine nucleotide-binding protein subunit beta-2-like 1;Guanine nucleotide-binding protein subunit beta-2-like 1, N-terminally processed	GNB2L1
NaN	20.9587230682373	20.9841232299805	21.4618396759033	21.6475944519043	20.9106426239014	21.733678817749	21.7779216766357	NaN	NaN	NaN	NaN				0	2	2	2	12,3	12,3	12,3	33,419	0	13,353	29324000	15	H0YC35;P10909;H0YAS8;E7ERK6;H0YLK8	H0YC35;P10909;H0YAS8;E7ERK6;H0YLK8	Clusterin;Clusterin;Clusterin beta chain;Clusterin alpha chain	CLU
NaN	19.4018707275391	NaN	19.5284843444824	NaN	20.2389965057373	NaN	NaN	19.487756729126	NaN	NaN	NaN				0	4	4	4	15,2	15,2	15,2	38,138	0	23,511	21381000	4	H0YH81;P06576;F8W079;F8W0P7;H0YI37	H0YH81;P06576;F8W079;F8W0P7	ATP synthase subunit beta;ATP synthase subunit beta, mitochondrial	ATP5B
NaN	NaN	NaN	NaN	NaN	NaN	21.3596038818359	21.4898357391357	21.2917079925537	23.7027149200439	22.4654064178467	23.4122219085693				0	2	2	2	6,4	6,4	6,4	70,733	0	15,763	20049000	11	H7BXV5;P39060;H7C457	H7BXV5;P39060;H7C457	Collagen alpha-1(XVIII) chain;Endostatin	COL18A1
19.4463729858398	19.9674739837646	20.3298091888428	21.4879245758057	21.3271789550781	NaN	23.0766429901123	23.1199703216553	21.4045238494873	20.898811340332	NaN	20.5207576751709				0	2	2	2	2,8	2,8	2,8	79,755	0	17,144	34944000	20	H7C1W1;Q92626	H7C1W1;Q92626	Peroxidasin homolog	PXDN
NaN	NaN	NaN	NaN	NaN	NaN	NaN	NaN	NaN	NaN	21.8398818969727	23.2042942047119				0	5	2	2	8,7	3,2	3,2	70,449	0	12,638	9206100	6	J3KMX3;P02771	J3KMX3;P02771	Alpha-fetoprotein	AFP
26.2152500152588	26.6738433837891	26.1627902984619	24.9070148468018	26.7283229827881	26.139949798584	23.7486801147461	24.1221046447754	24.8296794891357	24.1679077148438	24.7196273803711	24.5636615753174				0	14	14	13	45,7	45,7	43,8	39,817	0	121,45	942230000	86	J3KPS3;P04075;H3BQN4;H3BPS8;H3BUH7;H3BR04;H3BMQ8;H3BU78;H3BR68;A0A087WXX2;P05062	J3KPS3;P04075;H3BQN4;H3BPS8;H3BUH7;H3BR04;H3BMQ8	Fructose-bisphosphate aldolase;Fructose-bisphosphate aldolase A	ALDOA
21.8947105407715	23.1332015991211	22.5978260040283	22.0871562957764	23.8042011260986	22.2252635955811	NaN	21.4380683898926	21.5724201202393	NaN	NaN	21.1486759185791				0	4	4	4	36,2	36,2	36,2	17,293	0	33,151	64578000	10	K7EMN2;K7EM49;P52209;K7EPF6	K7EMN2;K7EM49;P52209;K7EPF6	6-phosphogluconate dehydrogenase, decarboxylating	PGD
19.7897891998291	19.5907440185547	19.5190486907959	NaN	NaN	NaN	NaN	NaN	NaN	NaN	NaN	NaN				0	2	2	2	34	34	34	5,5575	0	12,06	16563000	8	M0QX76;M0R1M5;M0R3H0;M0R210;Q6IPX4;P62249	M0QX76;M0R1M5;M0R3H0;M0R210;Q6IPX4;P62249	40S ribosomal protein S16	RPS16
NaN	19.8008403778076	21.4410610198975	26.0760631561279	26.3211688995361	26.6588077545166	24.0576324462891	23.9868507385254	23.3924427032471	NaN	NaN	NaN				0	8	8	8	29,2	29,2	29,2	40,92	0	62,709	278350000	50	O00292;O75610;A0A087WW09	O00292;O75610	Left-right determination factor 2;Left-right determination factor 1	LEFTY2;LEFTY1
21.8708324432373	21.9894351959229	23.1185283660889	21.1853771209717	21.2591991424561	20.5375366210938	19.8116035461426	20.1858005523682	20.3206939697266	20.3383235931396	NaN	NaN				0	4	4	4	4,3	4,3	4,3	123,38	0	28,113	58128000	20	O14980;H7BZC5;C9IZS4;C9JQ02;C9JV99;C9J673;C9JKM9	O14980	Exportin-1	XPO1
NaN	NaN	23.9032497406006	24.1570739746094	23.4011936187744	NaN	NaN	NaN	NaN	NaN	NaN	NaN				0	2	2	2	2,4	2,4	2,4	104,74	0	12,06	48380000	4	O15327;E9PG59;E9PHC0;D6RJC3;E7EQN9	O15327;E9PG59;E9PHC0;D6RJC3;E7EQN9	Type II inositol 3,4-bisphosphate 4-phosphatase	INPP4B
23.7086200714111	24.2717037200928	24.4510478973389	23.1848468780518	23.9320201873779	23.8396129608154	21.5154724121094	21.7584533691406	21.936429977417	20.6947250366211	21.3984832763672	21.1120986938477				0	8	8	3	11,7	11,7	5,4	104,85	0	103,19	211760000	46	O43707;H7C144;F5GXS2	O43707;H7C144;F5GXS2	Alpha-actinin-4	ACTN4
NaN	24.1106014251709	24.0065021514893	25.5975303649902	23.052417755127	NaN	22.3932018280029	22.5547332763672	NaN	NaN	22.1804981231689	NaN				0	2	2	2	15,1	15,1	15,1	18,804	0	106,27	102590000	25	U3KQK0;Q99880;Q99879;Q99877;Q93079;Q5QNW6;P62807;P58876;P57053;O60814;Q8N257;Q16778;P33778;P23527;P06899	U3KQK0;Q99880;Q99879;Q99877;Q93079;Q5QNW6;P62807;P58876;P57053;O60814;Q8N257;Q16778;P33778;P23527;P06899	Histone H2B;Histone H2B type 1-L;Histone H2B type 1-M;Histone H2B type 1-N;Histone H2B type 1-H;Histone H2B type 2-F;Histone H2B type 1-C/E/F/G/I;Histone H2B type 1-D;Histone H2B type F-S;Histone H2B type 1-K;Histone H2B type 3-B;Histone H2B type 2-E;Histone H2B type 1-B;Histone H2B type 1-O;Histone H2B type 1-J	HIST1H2BN;HIST1H2BL;HIST1H2BM;HIST1H2BH;HIST2H2BF;HIST1H2BC;HIST1H2BD;H2BFS;HIST1H2BK;HIST3H2BB;HIST2H2BE;HIST1H2BB;HIST1H2BO;HIST1H2BJ
24.9750442504883	25.8465404510498	25.9392127990723	23.8303565979004	25.3946342468262	24.7002296447754	22.3879814147949	22.3933067321777	24.3467864990234	22.0043258666992	22.478796005249	21.875602722168				0	8	8	8	22,9	22,9	22,9	46,659	0	67,296	354860000	48	O75874;C9J4N6;C9JJE5;C9JLU6;P48735	O75874;C9J4N6	Isocitrate dehydrogenase [NADP] cytoplasmic	IDH1
NaN	NaN	21.105655670166	22.3856391906738	22.1684894561768	21.5103626251221	23.1634006500244	23.4854202270508	21.9786529541016	21.9930686950684	22.0879001617432	22.0652961730957				0	4	4	4	6,3	6,3	6,3	88,039	0	30,086	54120000	15	Q5SR54;O94985	Q5SR54;O94985	Calsyntenin-1;Soluble Alc-alpha;CTF1-alpha	CLSTN1
NaN	23.4791412353516	23.4975318908691	24.2915115356445	24.3933582305908	27.7163333892822	22.1001472473145	NaN	22.9986057281494	NaN	NaN	NaN				0	6	6	6	42,3	42,3	42,3	30,083	0	50,1	297050000	21	O95813	O95813	Cerberus	CER1
25.6595153808594	25.7622299194336	25.7446308135986	25.5417366027832	26.260009765625	25.8483085632324	24.479944229126	24.4889793395996	25.8478546142578	25.0528736114502	25.0047035217285	24.3332672119141				0	10	9	9	31,3	27,7	27,7	36,688	0	97,094	674670000	90	P00338;F5GYU2;F5GXY2;F5GXH2;F5H5J4;F5H6W8;F5GZQ4;F5H8H6;F5GXC7;F5GWW2;F5GXU1	P00338;F5GYU2;F5GXY2;F5GXH2	L-lactate dehydrogenase A chain	LDHA
NaN	NaN	NaN	NaN	NaN	NaN	24.5768089294434	24.5733451843262	23.2166004180908	23.730447769165	23.3214111328125	23.4230365753174				0	3	3	3	2,6	2,6	2,6	141,78	0	28,154	81051000	8	P02458	P02458	Collagen alpha-1(II) chain;Collagen alpha-1(II) chain;Chondrocalcin	COL2A1
23.2967014312744	24.6783103942871	24.1540641784668	26.9689502716064	26.7992172241211	26.0243053436279	27.8479251861572	27.6634979248047	28.0119590759277	27.0752067565918	26.5683670043945	26.8034114837646				0	14	14	14	49,2	49,2	49,2	36,154	0	323,31	1432800000	212	P02649;H0Y7L5;E9PEV4;E7ERP7;CON__Q03247	P02649;H0Y7L5	Apolipoprotein E	APOE
25.0991268157959	26.3637771606445	25.3623561859131	29.2285079956055	29.0598468780518	27.5175075531006	30.1302585601807	30.0432262420654	30.0867671966553	30.004638671875	29.3553771972656	29.5929718017578				0	50	50	50	33,9	33,9	33,9	262,62	0	323,31	6285800000	759	P02751;H0Y7Z1;H0Y4K8	P02751;H0Y7Z1	Fibronectin;Anastellin;Ugl-Y1;Ugl-Y2;Ugl-Y3	FN1
NaN	22.3422889709473	21.4548797607422	NaN	NaN	NaN	19.5241279602051	20.0758762359619	NaN	21.1625099182129	21.2889518737793	23.7106189727783				0	10	10	8	2,7	2,7	2,1	515,6	0	62,813	20093000	23	P04114;A8MUN2	P04114	Apolipoprotein B-100;Apolipoprotein B-48	APOB
NaN	20.8567333221436	NaN	21.1435775756836	20.8409957885742	20.9399127960205	24.2690658569336	20.9939670562744	NaN	NaN	NaN	NaN				0	6	6	6	52,7	52,7	52,7	10,834	0	40,855	525890000	15	P05109	P05109	Protein S100-A8;Protein S100-A8, N-terminally processed	S100A8
NaN	25.0441017150879	25.6408309936523	24.5048828125	23.8947658538818	NaN	NaN	NaN	NaN	NaN	NaN	NaN				0	2	2	2	15,7	15,7	15,7	10,17	0	45,147	101860000	12	S4R3A2;S4R371;P05413	S4R3A2;S4R371;P05413	Fatty acid-binding protein, heart	FABP3
NaN	NaN	NaN	NaN	NaN	NaN	20.7154026031494	20.8962993621826	NaN	22.0767574310303	21.6039943695068	24.6034278869629				0	5	5	4	15,9	15,9	12,9	45,398	0	48,1	26690000	11	P06727	P06727	Apolipoprotein A-IV	APOA4
24.6731967926025	22.4530963897705	22.7671279907227	22.0931987762451	22.0485324859619	21.6659202575684	NaN	20.4580383300781	21.000789642334	NaN	20.92795753479	NaN				0	4	4	4	22,1	22,1	22,1	32,575	0	32,556	192070000	18	P06748;E5RI98	P06748;E5RI98	Nucleophosmin	NPM1
NaN	20.3715648651123	NaN	24.4620761871338	25.4408531188965	23.9765739440918	23.0192184448242	22.3996829986572	24.0193710327148	20.7177467346191	20.9855842590332	20.7931270599365				0	8	8	8	24,9	24,9	24,9	44,002	0	59,756	98168000	32	P07093;C9JN98	P07093;C9JN98	Glia-derived nexin	SERPINE2
26.4607486724854	26.9975509643555	26.7099094390869	26.8026733398438	27.2606925964355	26.340145111084	24.9140148162842	25.2586803436279	25.9862442016602	24.7944660186768	24.8997058868408	24.0759410858154				0	12	12	11	39,5	39,5	35,9	36,638	0	161,58	1447800000	163	P07195;A8MW50;C9J7H8;F5H793;F5H5G7;F5H155;G3XAP5;F5H245;P07864	P07195;A8MW50;C9J7H8	L-lactate dehydrogenase B chain;L-lactate dehydrogenase	LDHB
22.4048099517822	24.9166126251221	22.9703559875488	23.9693031311035	22.3253135681152	24.0492630004883	20.6535091400146	20.8339900970459	20.3515396118164	NaN	NaN	20.5434970855713				0	12	12	2	39,2	39,2	6,3	47,766	0	115,89	236220000	68	Q5JP53;P07437;Q5ST81;P04350;A0A0B4J269;Q13509;K7ESM5;Q9BUF5;G3V2A3;A0A075B736;Q5SQY0;Q3ZCM7;A6NNZ2;M0R1I1;G3V5W4;M0QY85;G3V2R8;M0R042;G3V3R4;M0R2D3;M0QZL7;M0QYM7;G3V2N6;M0R278;CON__ENSEMBL:ENSBTAP00000025008;Q9H4B7	Q5JP53;P07437;Q5ST81;P04350;A0A0B4J269;Q13509	Tubulin beta chain;Tubulin beta-4A chain;Tubulin beta-3 chain	TUBB;TUBB4A;TUBB3
25.7893009185791	20.1639842987061	19.7170429229736	20.2828578948975	20.1602954864502	20.6480770111084	19.5994873046875	NaN	NaN	NaN	NaN	NaN				0	6	6	6	55,7	55,7	55,7	15,054	0	55,248	273700000	19	P07737;K7EJ44;I3L3D5;CON__P02584	P07737;K7EJ44;I3L3D5	Profilin-1	PFN1
26.0116291046143	26.8791179656982	24.2957210540771	25.1381340026855	26.068826675415	25.2835502624512	23.7790641784668	23.5987796783447	24.192497253418	23.05690574646	22.9377956390381	21.7880363464355				0	23	12	12	35,7	19,1	19,1	84,659	0	300,54	814500000	106	P07900;G3V2J8;Q14568;Q58FF6;Q58FG0;Q58FG1	P07900	Heat shock protein HSP 90-alpha	HSP90AA1
28.4418983459473	28.7311096191406	26.4696884155273	26.8780651092529	27.9960422515869	27.7736682891846	25.7788887023926	25.8640308380127	26.2200374603271	24.6922149658203	24.916431427002	23.9237937927246				0	29	29	13	43,8	43,8	21,4	83,263	0	323,31	4426400000	282	P08238;Q58FF7;F8W026;Q96GW1;A0A1W2PRR1	P08238	Heat shock protein HSP 90-beta	HSP90AB1
20.3540172576904	21.4922828674316	20.5381050109863	21.8157749176025	20.8686866760254	22.2047863006592	19.3296775817871	19.8918876647949	20.4363422393799	NaN	20.034158706665	NaN				0	5	5	5	17,8	17,8	17,8	35,936	0	31,987	30504000	13	P08758;D6RBL5;D6RBE9;E9PHT9	P08758;D6RBL5;D6RBE9	Annexin A5;Annexin	ANXA5
24.3667297363281	24.26806640625	24.4455013275146	23.1419582366943	24.0932140350342	25.9638671875	24.4758071899414	24.2393608093262	24.7368602752686	23.6226558685303	23.5332641601563	23.3078594207764				0	6	6	6	43,3	43,3	43,3	23,356	0	323,31	438400000	63	P09211;A8MX94;A0A087X243;A0A087X2E9	P09211;A8MX94	Glutathione S-transferase P	GSTP1
22.2087802886963	23.0255336761475	21.3238868713379	20.8312091827393	21.6527652740479	NaN	20.2529201507568	20.2951316833496	21.1583232879639	NaN	21.30446434021	20.6720218658447				0	3	2	2	12,6	10,7	10,7	39,455	0	52,106	50622000	6	P09972;K7EKH5;J3KSV6;J3QKP5;A8MVZ9;C9J8F3	P09972;K7EKH5;J3KSV6;J3QKP5;A8MVZ9	Fructose-bisphosphate aldolase C;Fructose-bisphosphate aldolase	ALDOC
NaN	NaN	NaN	NaN	NaN	NaN	24.0694007873535	23.9751758575439	24.2570266723633	23.637767791748	23.1487674713135	23.4429092407227				0	5	5	5	15,3	15,3	15,3	40,165	0	46,827	64863000	21	P10915;D6RBS1;D6RC59;D6RAK7;D6RBX9;D6RFI7;D6RG04	P10915	Hyaluronan and proteoglycan link protein 1	HAPLN1
21.1055278778076	23.3307399749756	23.3790149688721	22.1756038665771	23.1033515930176	21.93678855896	20.2489891052246	20.4086246490479	20.8037281036377	NaN	NaN	NaN				0	2	2	2	10	10	10	28,768	0	31,263	66900000	19	P12004	P12004	Proliferating cell nuclear antigen	PCNA
20.2851181030273	20.2398128509521	19.8602695465088	19.717378616333	19.663064956665	20.0891304016113	19.8911304473877	NaN	19.756311416626	NaN	NaN	NaN				0	2	2	2	6	6	6	42,644	0	13,699	16805000	7	P12277;G3V461;G3V4N7	P12277;G3V461;G3V4N7	Creatine kinase B-type	CKB
26.4572772979736	26.362606048584	26.0237121582031	24.0405120849609	26.2652606964111	23.6458148956299	22.6990966796875	22.500524520874	22.5043621063232	21.5842609405518	21.1262855529785	21.1682758331299				0	17	17	17	23,3	23,3	23,3	95,337	0	140,03	916790000	70	P13639;K7EJ74;K7EP67;Q15029	P13639	Elongation factor 2	EEF2
25.4784622192383	26.0002613067627	26.1869945526123	25.0800552368164	25.7316150665283	22.8863048553467	21.4079494476318	21.6567420959473	22.3057460784912	20.3498115539551	21.9499530792236	NaN				0	18	18	18	22,2	22,2	22,2	123,8	0	174,55	622130000	90	P18206;A0A096LPE1	P18206	Vinculin	VCL
24.0084705352783	23.9743003845215	24.9783210754395	22.0884838104248	22.4436187744141	22.2987995147705	21.6509704589844	21.60964012146	21.5926342010498	21.2148971557617	21.0219478607178	NaN				0	10	10	10	17	17	17	76,613	0	98,639	312600000	37	P19338;H7BY16	P19338;H7BY16	Nucleolin	NCL
25.8435478210449	27.1042957305908	27.6381683349609	24.2180061340332	24.6271171569824	23.9163398742676	20.6898708343506	22.2828578948975	23.126522064209	NaN	21.9766616821289	NaN				0	28	28	26	16,5	16,5	15,7	276,55	0	236,17	756310000	70	Q5HY54;P21333;A0A087WWY3;Q60FE5;F8WE98;H0Y5C6	Q5HY54;P21333;A0A087WWY3;Q60FE5	Filamin-A	FLNA
20.8833045959473	21.9513778686523	20.9492053985596	21.0820636749268	21.6795997619629	NaN	NaN	NaN	19.6043109893799	NaN	NaN	NaN				0	4	4	4	14,1	14,1	14,1	47,079	0	76,206	14310000	10	P22234;D6RF62;E9PBS1	P22234;D6RF62;E9PBS1	Multifunctional protein ADE2;Phosphoribosylaminoimidazole-succinocarboxamide synthase;Phosphoribosylaminoimidazole carboxylase	PAICS
23.8467063903809	24.5054874420166	24.4423408508301	22.6063003540039	24.0019588470459	21.7693901062012	21.5945491790771	21.1274833679199	21.6261367797852	20.9344501495361	21.6394901275635	21.4375610351563				0	11	11	11	16	16	16	117,85	0	202,81	176100000	69	P22314;Q5JRR6;Q5JRS1;Q5JRS3;Q5JRS2;Q5JRR9;Q5JRS0	P22314	Ubiquitin-like modifier-activating enzyme 1	UBA1
NaN	NaN	NaN	NaN	NaN	22.0337219238281	23.3363361358643	23.6479015350342	22.4439220428467	NaN	NaN	NaN				0	6	6	1	12,7	12,7	3,3	77,213	0	59,136	89122000	17	P23142	P23142	Fibulin-1	FBLN1
24.4785251617432	25.4781856536865	24.7263488769531	24.3638591766357	24.4146099090576	22.6475505828857	21.9132747650146	21.9955883026123	22.2012901306152	20.6577892303467	20.7255897521973	20.7947940826416				0	7	7	7	18,1	18,1	18,1	47,716	0	51,315	279210000	36	P23526	P23526	Adenosylhomocysteinase	AHCY
24.2846794128418	23.6945552825928	23.1325130462646	23.0602416992188	24.8284702301025	23.0087776184082	22.2248802185059	22.042667388916	22.0966758728027	21.6407718658447	21.1588172912598	21.2272911071777				0	6	6	6	16,5	16,5	16,5	50,118	0	38,698	216010000	16	P26641	P26641	Elongation factor 1-gamma	EEF1G
21.9454231262207	NaN	21.4572868347168	NaN	NaN	NaN	NaN	NaN	NaN	NaN	NaN	NaN				0	3	3	3	17	17	17	25,035	0	19,102	43468000	9	P30041	P30041	Peroxiredoxin-6	PRDX6
22.7664623260498	24.0363254547119	24.1969299316406	22.6904468536377	23.408597946167	21.9906120300293	22.4467258453369	21.5784683227539	21.2860774993896	22.4198017120361	20.6789989471436	21.1480541229248				0	9	9	9	14,9	14,9	14,9	94,33	0	162,13	118320000	43	P34932;A0A087WTS8;A0A087WYC1	P34932;A0A087WTS8;A0A087WYC1	Heat shock 70 kDa protein 4	HSPA4
23.5409698486328	24.3761692047119	24.1462383270264	23.5672073364258	24.5654640197754	23.4546279907227	22.0278301239014	22.3160610198975	22.6420936584473	21.7565402984619	22.1065826416016	21.7100296020508				0	9	9	9	23,1	23,1	23,1	50,663	0	81,64	178270000	44	P50395;Q5SX87;V9GYJ7;V9GYF8;Q5SX90;Q5SX86;Q5SX91;P31150	P50395;Q5SX87	Rab GDP dissociation inhibitor beta	GDI2
23.4222679138184	23.9350814819336	22.5948219299316	23.1654262542725	23.5985527038574	22.8916721343994	22.2449016571045	22.4724388122559	22.7207546234131	NaN	NaN	NaN				0	6	6	6	21	21	21	42,403	0	126,37	103330000	14	P50453;P50452;H7BXK7;C9J7N5;A0A1B0GU38;A0A0C4DGW9;P30740;O75830	P50453	Serpin B9	SERPINB9
23.0107593536377	23.552038192749	23.916431427002	23.5665111541748	23.4412651062012	23.3360633850098	NaN	NaN	NaN	NaN	NaN	NaN				0	5	5	5	14,8	14,8	14,8	46,44	0	33,882	148690000	17	P50454;E9PKH2;H0YEP8;E9PR70;E9PPV6;E9PQ34;E9PJH8;E9PIG2;E9PRS3;E9PNX1;E9PK86;E9PMI5	P50454;E9PKH2	Serpin H1	SERPINH1
20.5336456298828	20.7082614898682	20.4528198242188	NaN	NaN	20.5597362518311	NaN	NaN	NaN	NaN	NaN	NaN				0	3	3	3	7,9	7,9	7,9	57,861	0	18,852	20502000	8	P52292;J3QLL0;J3KS65	P52292	Importin subunit alpha-1	KPNA2
21.3856925964355	NaN	21.1303768157959	NaN	21.0187606811523	NaN	NaN	NaN	20.1743850708008	NaN	NaN	NaN				0	4	4	4	6	6	6	110,42	0	26,161	30461000	10	P55060	P55060	Exportin-2	CSE1L
24.7569980621338	23.0625820159912	24.6667652130127	22.2343559265137	22.5518970489502	21.87428855896	20.288049697876	20.7249240875244	21.0487976074219	20.971549987793	20.4436435699463	19.7998924255371				0	16	16	16	29,4	29,4	29,4	89,321	0	191,21	293430000	54	P55072;C9JUP7;C9IZA5	P55072	Transitional endoplasmic reticulum ATPase	VCP
23.1183071136475	23.08864402771	22.6963386535645	22.2944030761719	23.6109924316406	24.788106918335	23.1542339324951	23.6229915618896	25.0714874267578	22.9183444976807	23.0139808654785	23.4100227355957				0	7	7	7	39,2	39,2	39,2	30,791	0	47,283	199190000	31	P60174;U3KQF3;U3KPZ0;U3KPS5	P60174	Triosephosphate isomerase	TPI1
NaN	20.5374412536621	20.5089130401611	NaN	NaN	20.0677604675293	20.0606536865234	20.1694984436035	22.0174694061279	19.9763126373291	20.1633701324463	NaN				0	2	2	2	7,7	7,7	7,7	41,807	0	13,873	14725000	8	Q5T6W2;P61978	Q5T6W2;P61978	Heterogeneous nuclear ribonucleoprotein K	HNRNPK
NaN	23.2241744995117	21.9769420623779	21.0921669006348	NaN	20.4758567810059	NaN	NaN	NaN	NaN	NaN	NaN				0	2	2	2	14,9	14,9	14,9	21,879	0	86,551	32299000	6	Q5JR95;P62241	Q5JR95;P62241	40S ribosomal protein S8	RPS8
22.2920455932617	22.8110580444336	22.3451900482178	21.0782241821289	22.6124095916748	23.6963596343994	22.182409286499	22.5227699279785	23.6302318572998	21.8950805664063	22.3606491088867	21.7670078277588				0	7	6	6	34,9	31	31	29,174	0	46,091	74499000	31	P62258;K7EM20;B4DJF2;I3L3T1;K7EIT4;I3L0W5	P62258	14-3-3 protein epsilon	YWHAE
23.0010643005371	23.3322429656982	22.8142318725586	21.9926528930664	22.8290023803711	22.5275497436523	NaN	NaN	NaN	NaN	NaN	NaN				0	6	6	6	21,3	21,3	21,3	29,597	0	37,92	98558000	25	P62701;C9JEH7;Q8TD47;P22090	P62701	40S ribosomal protein S4, X isoform	RPS4X
23.477783203125	19.8691844940186	20.255687713623	20.4775371551514	20.8304347991943	20.3483009338379	20.3581008911133	NaN	NaN	NaN	NaN	NaN				0	7	7	7	46,7	46,7	46,7	18,012	0	48,712	146230000	15	P62937;F8WE65;C9J5S7;E5RIZ5;Q9Y536	P62937;F8WE65;C9J5S7	Peptidyl-prolyl cis-trans isomerase A;Peptidyl-prolyl cis-trans isomerase A, N-terminally processed;Peptidyl-prolyl cis-trans isomerase	PPIA
23.4043159484863	23.4582633972168	23.1902980804443	22.0822257995605	23.417896270752	24.6936511993408	23.3410949707031	24.1019744873047	24.659761428833	23.2198238372803	23.4223957061768	23.0275936126709				0	9	9	8	46,9	46,9	42,9	27,745	0	135,18	277910000	99	P63104;E7EX29;B0AZS6;B7Z2E6;H0YB80;E7ESK7;E5RGE1;E5RIR4;E9PD24;E7EVZ2;P27348;P31946;Q04917;P61981	P63104;E7EX29;B0AZS6;B7Z2E6;H0YB80	14-3-3 protein zeta/delta	YWHAZ
26.4445533752441	27.2894725799561	26.8705596923828	26.6929874420166	27.2500667572021	26.2954406738281	24.9023303985596	25.2684936523438	25.4829006195068	23.5369434356689	23.6162757873535	23.2569541931152				0	9	9	9	26,2	26,2	26,2	50,184	0	115,51	1646100000	138	Q5VTE0;P68104;A0A087WVQ9;A0A087WV01;Q05639;A6PW80;Q5JR01	Q5VTE0;P68104;A0A087WVQ9;A0A087WV01;Q05639	Putative elongation factor 1-alpha-like 3;Elongation factor 1-alpha 1;Elongation factor 1-alpha;Elongation factor 1-alpha 2	EEF1A1P5;EEF1A1;EEF1A2
NaN	NaN	NaN	NaN	NaN	19.8004760742188	20.7322311401367	21.4750652313232	20.6997318267822	20.044734954834	20.2096729278564	20.0780925750732				0	2	2	2	3,2	3,2	3,2	126,57	0	15,985	9386900	6	P98095	P98095	Fibulin-2	FBLN2
NaN	NaN	NaN	NaN	NaN	NaN	22.0810890197754	22.3726005554199	21.2206954956055	26.2588424682617	26.186918258667	25.3795776367188				0	16	16	16	6,1	6,1	6,1	468,83	0	106,17	99287000	50	P98160;A0A0U1RQT3	P98160	Basement membrane-specific heparan sulfate proteoglycan core protein;Endorepellin;LG3 peptide	HSPG2
25.0865077972412	26.3644618988037	26.5068206787109	25.1067333221436	25.1220645904541	26.2925128936768	22.0293140411377	21.1630001068115	NaN	NaN	NaN	NaN				0	8	8	7	44,2	44,2	38,7	22,11	0	55,657	731230000	71	Q06830;A0A0A0MSI0;A0A0A0MRQ5;H7C3T4;Q13162	Q06830;A0A0A0MSI0;A0A0A0MRQ5	Peroxiredoxin-1	PRDX1
NaN	21.7431621551514	22.4173812866211	23.8230857849121	23.9858093261719	22.9361419677734	25.2796955108643	25.4246711730957	24.2897529602051	23.8961524963379	25.1626930236816	24.0274085998535				0	4	4	4	12,7	12,7	12,7	34,985	0	50,503	185840000	27	Q12841;C9J5G4	Q12841	Follistatin-related protein 1	FSTL1
NaN	NaN	NaN	NaN	NaN	NaN	22.9641284942627	23.3784866333008	21.0659866333008	22.0489635467529	22.4165840148926	22.0213375091553				0	4	4	3	5	5	4,3	151,25	0	109,69	28886000	13	Q14112;A0A087WZP6;H0YJV3	Q14112;A0A087WZP6;H0YJV3	Nidogen-2	NID2
18.8709602355957	NaN	NaN	18.9310779571533	19.2795734405518	19.9030990600586	21.5528583526611	21.1634311676025	20.2339744567871	20.1077632904053	19.9807815551758	19.5129680633545				0	3	3	3	3,6	3,6	3,6	122,29	0	18,376	16474000	6	Q14126;J3KSI6	Q14126;J3KSI6	Desmoglein-2	DSG2
22.4449844360352	22.2940101623535	23.7159671783447	21.4034843444824	21.8409576416016	21.7742652893066	NaN	NaN	21.7973289489746	21.7318572998047	21.1428928375244	21.554874420166				0	9	7	6	4,4	3,7	3,1	291,02	0	51,855	72351000	16	Q14315	Q14315	Filamin-C	FLNC
22.7335968017578	22.6199283599854	22.2187156677246	22.0234031677246	21.999963760376	20.935962677002	NaN	20.6304092407227	20.6154003143311	NaN	20.213830947876	19.4279384613037				0	8	8	8	13,1	13,1	13,1	97,169	0	208,34	81141000	44	Q14974;J3KTM9;J3QR48;J3QRG4	Q14974;J3KTM9	Importin subunit beta-1	KPNB1
23.7565402984619	23.0953884124756	21.3438625335693	21.4368495941162	21.7539730072021	21.6905536651611	NaN	NaN	NaN	NaN	NaN	NaN				0	8	1	1	20,2	3,9	3,9	44,348	0	7,5055	108260000	25	Q58FF8	Q58FF8	Putative heat shock protein HSP 90-beta 2	HSP90AB2P
21.7342166900635	21.3348903656006	21.1923770904541	21.1636161804199	20.9309196472168	NaN	NaN	NaN	NaN	NaN	NaN	NaN				0	7	7	7	7,8	7,8	7,8	136,37	0	43,169	37459000	15	Q86VP6;A0A0C4DGH5	Q86VP6;A0A0C4DGH5	Cullin-associated NEDD8-dissociated protein 1	CAND1
NaN	NaN	NaN	NaN	NaN	NaN	NaN	19.736515045166	19.8905220031738	NaN	NaN	22.4104118347168				0	2	2	2	4	4	4	51,286	0	14,293	5683300	4	Q92743;H0Y7G9	Q92743;H0Y7G9	Serine protease HTRA1	HTRA1
23.2878532409668	24.9085731506348	23.6761608123779	22.5962333679199	24.0342273712158	21.7540531158447	20.9727420806885	NaN	21.7468166351318	NaN	NaN	21.2890644073486				0	8	8	8	15,3	15,3	15,3	56,084	0	57,843	161880000	27	Q9P258	Q9P258	Protein RCC2	RCC2
21.8074264526367	21.2979335784912	21.1987438201904	20.9008026123047	21.1355209350586	20.5547790527344	19.8206996917725	NaN	20.6521968841553	NaN	NaN	NaN				0	2	2	2	6,1	6,1	6,1	43,786	0	14,511	33171000	6	Q9UQ80;F8VR77	Q9UQ80;F8VR77	Proliferation-associated protein 2G4	PA2G4
24.3947334289551	25.5089378356934	24.9140148162842	23.3054943084717	23.7297229766846	23.1676940917969	20.7471446990967	21.0955181121826	20.9064655303955	NaN	NaN	NaN				0	8	8	8	21,9	21,9	21,9	40,422	0	134,86	225990000	53	Q9Y617	Q9Y617	Phosphoserine aminotransferase	PSAT1

## Sheet: Planilha4
CMd1_1	CMd1_2	CMd1_3	CMd4_1	CMd4_2	CMd4_3	CMd8_1	CMd8_2	CMd8_3	CMd15_1	CMd15_2	CMd15_3	Only identified by site	Reverse	Potential contaminant	nCM	GOCC slim name	KEGG name	Peptides	Razor + unique peptides	Unique peptides	Sequence coverage [%]	Unique + razor sequence coverage [%]	Unique sequence coverage [%]	Mol. weight [kDa]	Q-value	Score	Intensity	MS/MS count	Protein IDs	Majority protein IDs	Protein names	Gene names
#!{Type}E	E	E	E	E	E	E	E	E	E	E	E	C	C	C	C	C	C	N	N	N	N	N	N	N	N	N	N	N	T	T	T	T
#!{C:CM/day}CMd1	CMd1	CMd1	CMd4	CMd4	CMd4	CMd8	CMd8	CMd8	CMd15	CMd15	CMd15
20.2953567504883	NaN	NaN	19.9563140869141	NaN	19.7121467590332	NaN	NaN	NaN	NaN	NaN	NaN				0	cell part;cytoplasm;intracellular membrane-bounded organelle;intracellular organelle;macromolecular complex;membrane;nucleoplasm;nucleus;organelle;ribonucleoprotein complex;spliceosomal complex		3	3	3	10,3	10,3	10,3	29,836	0	20,971	35010000	6	A0A087WUI2;P22626	A0A087WUI2;P22626	Heterogeneous nuclear ribonucleoproteins A2/B1	HNRNPA2B1
24.4512367248535	23.1559944152832	22.6221199035645	21.0363750457764	21.7849655151367	21.0020275115967	20.653247833252	19.7518901824951	20.1698665618896	NaN	20.2624702453613	19.7154197692871				0	cell part;cytoplasm;cytoplasmic membrane-bounded vesicle;cytosol;extracellular organelle;intracellular membrane-bounded organelle;intracellular non-membrane-bounded organelle;intracellular organelle;macromolecular complex;membrane;mitochondrion;organelle;plasma membrane;protein complex;vesicle	Bacterial invasion of epithelial cells;Endocrine and other factor-regulated calcium reabsorption;Endocytosis;Huntington's disease;Lysosome	14	14	14	11,9	11,9	11,9	192,06	0	129,63	129410000	33	A0A087WVQ6;Q00610;J3KS13;A0A087WX41;P53675;J3KRF5;K7EJJ5;J3KSQ2;F5H5N6	A0A087WVQ6;Q00610	Clathrin heavy chain;Clathrin heavy chain 1	CLTC
22.4157848358154	25.5781631469727	22.5140514373779	22.2501163482666	22.6505336761475	22.3418273925781	NaN	NaN	NaN	NaN	NaN	NaN				0	cell part;cytosol;extracellular organelle;intracellular membrane-bounded organelle;intracellular organelle;nucleus;organelle;vesicle	Amino sugar and nucleotide sugar metabolism;Galactose metabolism;Pentose and glucuronate interconversions;Starch and sucrose metabolism	6	6	6	16,7	16,7	16,7	56,967	0	46,327	87911000	16	A0A087WYS1;E7EUC7;Q16851;C9JVG3;C9JQU9;C9JNZ1;C9JWG0;C9JTZ5;C9JUW1	A0A087WYS1;E7EUC7;Q16851;C9JVG3;C9JQU9;C9JNZ1	UTP--glucose-1-phosphate uridylyltransferase	UGP2
21.6070232391357	22.5935688018799	NaN	NaN	NaN	21.8502597808838	NaN	NaN	NaN	NaN	NaN	NaN				0	cell part;cytoplasm;cytosol;extracellular organelle;intracellular membrane-bounded organelle;intracellular organelle;macromolecular complex;nucleoplasm;nucleus;organelle;proteasome complex;protein complex;vesicle	Proteasome	2	2	2	11,2	11,2	11,2	25,041	0	12,976	50499000	3	A0A087WYS6;O14818;Q8TAA3;H0Y586	A0A087WYS6;O14818;Q8TAA3;H0Y586	Proteasome subunit alpha type-7;Proteasome subunit alpha type-7-like	PSMA8;PSMA7
NaN	22.74831199646	22.1645660400391	25.7771587371826	24.6907253265381	24.1656875610352	26.2883281707764	26.1726837158203	25.5389575958252	25.0883293151855	25.3946018218994	24.9652118682861				0	cell part;extracellular matrix;extracellular organelle;extracellular region;macromolecular complex;membrane;organelle;plasma membrane;protein complex;vesicle	ECM-receptor interaction;Focal adhesion;Protein digestion and absorption	10	10	10	13,4	13,4	13,4	108,34	0	96,348	383530000	59	A0A087X0S5;P12109	A0A087X0S5;P12109	Collagen alpha-1(VI) chain	COL6A1
23.3439445495605	22.5541934967041	22.8206520080566	21.5783767700195	21.5287418365479	NaN	NaN	NaN	NaN	20.4380683898926	NaN	NaN				0	cell part;cytoplasm;cytosol;endoplasmic reticulum;intracellular membrane-bounded organelle;intracellular organelle;macromolecular complex;nucleoplasm;nucleus;organelle;protein complex		3	3	3	13,2	13,2	13,2	31,124	0	92,021	138680000	20	A0A0C4DFV9;Q01105;A0A087X027;P0DME0	A0A0C4DFV9;Q01105;A0A087X027;P0DME0	Protein SET;Protein SETSIP	SET;SETSIP
22.2425479888916	22.1990451812744	23.4226512908936	21.6263599395752	22.4471797943115	22.8093318939209	21.0834922790527	21.5369205474854	21.9691619873047	20.6942157745361	21.2779293060303	21.0937786102295				0	cell part;cytoplasm;cytosol;extracellular organelle;intracellular membrane-bounded organelle;intracellular organelle;macromolecular complex;membrane;nucleus;organelle;plasma membrane;preribosome;ribonucleoprotein complex;small ribosomal subunit;vesicle	Ribosome	5	5	5	26,2	26,2	26,2	29,404	0	33,775	96314000	17	C9J9K3;A0A0C4DG17;P08865;F8WD59	C9J9K3;A0A0C4DG17;P08865;F8WD59	40S ribosomal protein SA	RPSA
NaN	NaN	NaN	NaN	NaN	22.4644088745117	22.3613185882568	22.5681114196777	NaN	NaN	NaN	NaN				0	cell part;extracellular organelle;extracellular region;extracellular space;membrane;organelle;plasma membrane;vesicle	Complement and coagulation cascades;Staphylococcus aureus infection	2	2	2	4,6	4,6	4,6	65,769	0	13,622	35676000	6	A0A0G2JH38;E7ETN3;B4E1Z4;P00751;H7C5H1	A0A0G2JH38;E7ETN3;B4E1Z4;P00751;H7C5H1	Complement factor B;Complement factor B Ba fragment;Complement factor B Bb fragment	CFB
20.638032913208	23.9993801116943	21.4653816223145	NaN	20.8353004455566	20.5186462402344	19.8827095031738	19.895751953125	NaN	NaN	NaN	NaN				0	cell part;cytoplasm;intracellular membrane-bounded organelle;intracellular non-membrane-bounded organelle;intracellular organelle;macromolecular complex;membrane;nucleolus;nucleoplasm;nucleus;organelle;protein complex;ribonucleoprotein complex;spliceosomal complex;transcription export complex	mRNA surveillance pathway;RNA transport;Spliceosome	4	4	4	14,3	14,3	14,3	38,125	0	43,144	41657000	8	A0A0G2JJZ9;Q13838;H0Y400;A0A140T9X3;Q5STU3;O00148;A0A140T9X9;A0A140T996;F6UJC5;A0A140TA18;F6WLT2;A0A140T9K2;A0A140T9N3;A0A140T9L4;A0A140T973;A0A140T9K1;H0YCC6;F6QYI9;A0A0G2JJL7;F6R6M7;F6S4E6;A0A0A0MT12;F6TRA5	A0A0G2JJZ9;Q13838;H0Y400;A0A140T9X3;Q5STU3;O00148;A0A140T9X9;A0A140T996;F6UJC5;A0A140TA18;F6WLT2	Spliceosome RNA helicase DDX39B;ATP-dependent RNA helicase DDX39A	DDX39B;DDX39A
22.6383209228516	21.8470134735107	23.928861618042	21.2775897979736	22.2624702453613	20.7399940490723	20.0247230529785	19.5633525848389	20.4430370330811	19.5680751800537	19.7183990478516	NaN				0	cell part;cytoplasm;cytoplasmic membrane-bounded vesicle;cytosol;extracellular organelle;Golgi apparatus;intracellular membrane-bounded organelle;intracellular organelle;membrane;mitochondrion;organelle;plasma membrane;vesicle	Fatty acid biosynthesis;Insulin signaling pathway	8	8	8	5	5	5	273,2	0	54,745	94344000	28	A0A0U1RQF0;P49327	A0A0U1RQF0;P49327	Fatty acid synthase;[Acyl-carrier-protein] S-acetyltransferase;[Acyl-carrier-protein] S-malonyltransferase;3-oxoacyl-[acyl-carrier-protein] synthase;3-oxoacyl-[acyl-carrier-protein] reductase;3-hydroxyacyl-[acyl-carrier-protein] dehydratase;Enoyl-[acyl-carrier-protein] reductase;Oleoyl-[acyl-carrier-protein] hydrolase	FASN
22.3265209197998	25.3211345672607	25.4643211364746	25.3443508148193	22.4048099517822	21.3647956848145	22.3264122009277	21.6799430847168	21.464183807373	22.1080837249756	22.1499462127686	21.9622936248779				0	cell part;chromosome;extracellular organelle;intracellular membrane-bounded organelle;intracellular non-membrane-bounded organelle;intracellular organelle;macromolecular complex;nuclear chromosome;nucleoplasm;nucleosome;nucleus;organelle;vesicle	Systemic lupus erythematosus	3	3	3	20,7	20,7	20,7	18,481	0	24,299	184080000	29	A0A0U1RR32;A0A0U1RRH7;Q99878;Q96KK5;Q9BTM1;Q16777;Q93077;Q7L7L0;Q6FI13;P20671;P0C0S8;P04908;H0YFX9;C9J0D1;Q71UI9;P0C0S5;Q96QV6;P16104;C9J386;Q8IUE6	A0A0U1RR32;A0A0U1RRH7;Q99878;Q96KK5;Q9BTM1;Q16777;Q93077;Q7L7L0;Q6FI13;P20671;P0C0S8;P04908;H0YFX9;C9J0D1;Q71UI9;P0C0S5;Q96QV6;P16104	Histone H2A type 1-J;Histone H2A type 1-H;Histone H2A.J;Histone H2A type 2-C;Histone H2A type 1-C;Histone H2A type 3;Histone H2A type 2-A;Histone H2A type 1-D;Histone H2A type 1;Histone H2A type 1-B/E;Histone H2A;Histone H2A.V;Histone H2A.Z;Histone H2A type 1-A;Histone H2AX	HIST1H2AJ;HIST1H2AH;H2AFJ;HIST2H2AC;HIST1H2AC;HIST3H2A;HIST2H2AA3;HIST1H2AD;HIST1H2AG;HIST1H2AB;H2AFV;H2AFZ;HIST1H2AA;H2AFX
NaN	NaN	NaN	NaN	NaN	29.9460067749023	30.1361389160156	30.2073440551758	30.7542190551758	30.9351558685303	30.2818450927734	NaN				0	cell part;centrosome;cytosol;intracellular non-membrane-bounded organelle;intracellular organelle;macromolecular complex;membrane;microtubule organizing center;nucleoplasm;organelle;protein complex		1	1	1	2,2	2,2	2,2	57,183	0,0080214	6,4613	11509000000	12	B3KTU7;Q9BSJ2	B3KTU7;Q9BSJ2	Gamma-tubulin complex component 2	TUBGCP2
21.0953254699707	20.5459480285645	NaN	20.5561847686768	20.6427116394043	21.9244823455811	NaN	NaN	NaN	NaN	20.3451633453369	NaN				0	cell part;cell projection;cilium;cytoplasm;cytosol;extracellular matrix;extracellular organelle;intracellular membrane-bounded organelle;intracellular organelle;membrane;mitochondrion;nucleus;organelle;plasma membrane;vesicle	Carbon fixation in photosynthetic organisms;Glycolysis / Gluconeogenesis;Purine metabolism;Pyruvate metabolism;Type II diabetes mellitus	5	5	5	15,1	15,1	15,1	49,897	0	32,906	32296000	6	B4DNK4;P14618;H3BTN5;H3BQ34;H3BR70	B4DNK4;P14618;H3BTN5;H3BQ34;H3BR70	Pyruvate kinase;Pyruvate kinase PKM	PKM
22.7285614013672	24.9257869720459	24.6366062164307	23.7643566131592	24.7488842010498	21.8388824462891	21.7088508605957	21.5313625335693	23.4058742523193	21.6719341278076	21.8612461090088	22.2782135009766				0	cell part;cytoplasm;intracellular membrane-bounded organelle;intracellular non-membrane-bounded organelle;intracellular organelle;macromolecular complex;membrane;nucleolus;nucleoplasm;nucleus;organelle;ribonucleoprotein complex		4	4	4	15,6	15,6	15,6	38,91	0	68,397	186440000	35	B4DY09;Q12905;X6R6Z1;A0A0A0MRL0	B4DY09;Q12905;X6R6Z1	Interleukin enhancer-binding factor 2	ILF2
23.8990135192871	25.3178272247314	24.988151550293	22.4267520904541	21.7506637573242	22.5556926727295	21.4041080474854	21.661491394043	21.7457084655762	20.3425617218018	NaN	20.3462448120117				0	cell part;cytoplasm;cytoplasmic membrane-bounded vesicle;cytosol;endosome;extracellular organelle;intracellular;intracellular membrane-bounded organelle;intracellular non-membrane-bounded organelle;intracellular organelle;macromolecular complex;membrane;midbody;nuclear pore;nucleocytoplasmic shuttling complex;nucleolus;nucleoplasm;nucleus;organelle;protein complex;vesicle	Ribosome biogenesis in eukaryotes;RNA transport	5	5	5	33,3	33,3	33,3	22,436	0	89,257	193470000	22	F5H018;B5MDF5;J3KQE5;P62826;B4DV51;H0YFC6	F5H018;B5MDF5;J3KQE5;P62826;B4DV51	GTP-binding nuclear protein Ran	RAN
22.0358371734619	20.5259265899658	20.7640132904053	19.7414932250977	20.8631000518799	20.3360366821289	19.3646354675293	19.4866390228271	20.4613399505615	19.2473907470703	19.5502967834473	19.2796649932861				0	cell part;cytoplasm;intracellular membrane-bounded organelle;intracellular organelle;macromolecular complex;nucleoplasm;nucleus;organelle;ribonucleoprotein complex		2	2	2	7,9	7,9	7,9	30,302	0	28,405	40989000	16	D6R9P3;D6RD18;D6RBZ0;Q99729	D6R9P3;D6RD18;D6RBZ0;Q99729	Heterogeneous nuclear ribonucleoprotein A/B	HNRNPAB
23.7226524353027	23.4974098205566	23.8152866363525	22.8873271942139	23.7383041381836	22.3078308105469	21.9575901031494	21.9351348876953	23.5374183654785	21.6681308746338	22.6085357666016	21.6676540374756				0	cell part;cytosol;extracellular organelle;intracellular membrane-bounded organelle;intracellular organelle;macromolecular complex;nucleoplasm;nucleus;organelle;ribonucleoprotein complex;vesicle		4	4	4	22,6	22,6	22,6	23,076	0	69,195	177530000	46	D6RAF8;Q14103;D6RF44;H0YA96;H0Y8G5;D6RD83;D6RBQ9;A0A087WUK2;O14979	D6RAF8;Q14103;D6RF44;H0YA96;H0Y8G5;D6RD83;D6RBQ9	Heterogeneous nuclear ribonucleoprotein D0	HNRNPD
20.6269397735596	20.3524017333984	NaN	21.3958187103271	NaN	23.3447570800781	20.6407718658447	20.9880828857422	NaN	NaN	NaN	NaN				0	cell part;cytoplasm;cytosol;extracellular organelle;organelle;vesicle	Nitrogen metabolism	2	2	2	24,1	24,1	24,1	9,4069	0	15,713	52342000	30	E5RJF6;E5RJI8;E5RH81;H0YBE2;E5RFE7;E5RHP7;P00915;E5RG81	E5RJF6;E5RJI8;E5RH81;H0YBE2;E5RFE7;E5RHP7;P00915;E5RG81	Carbonic anhydrase 1	CA1
23.3106346130371	21.9406299591064	22.1046962738037	22.3344268798828	22.3729724884033	23.6934928894043	20.2810478210449	20.1526412963867	NaN	19.3547916412354	19.6489200592041	19.6587657928467				0	apical part of cell;brush border;cell body;cell part;cell projection;cytoplasm;cytoskeleton;cytosol;extracellular organelle;extracellular space;filopodium;intracellular membrane-bounded organelle;intracellular non-membrane-bounded organelle;intracellular organelle;macromolecular complex;membrane;microvillus;nucleolus;nucleus;organelle;plasma membrane;protein complex;vesicle	Gastric acid secretion;Leukocyte transendothelial migration;Measles;Pathogenic Escherichia coli infection;Regulation of actin cytoskeleton	6	6	6	9,7	9,7	9,7	69,371	0	52,143	96286000	21	E7EQR4;P15311;P26038;P35241;V9GZ54;E9PQ82;E9PNV3	E7EQR4;P15311;P26038;P35241	Ezrin;Moesin;Radixin	EZR;MSN;RDX
19.7428417205811	NaN	19.3584022521973	NaN	19.0500602722168	NaN	NaN	NaN	NaN	NaN	NaN	NaN				0	cell part;cytoplasm;cytosol;intracellular membrane-bounded organelle;intracellular organelle;nucleoplasm;nucleus;organelle		3	3	3	11,4	11,4	11,4	37,709	0	17,078	7521500	3	E9PKG1;Q99873;E9PIX6;E9PNR9;E9PQ98;H0YDE4	E9PKG1;Q99873;E9PIX6	Protein arginine N-methyltransferase 1	PRMT1
22.6736602783203	22.8990325927734	22.6955108642578	22.0074100494385	22.501594543457	NaN	NaN	NaN	NaN	NaN	NaN	NaN				0	cell part;cytoplasm;cytosol;extracellular organelle;intracellular membrane-bounded organelle;intracellular non-membrane-bounded organelle;intracellular organelle;macromolecular complex;membrane;nucleolus;nucleus;organelle;ribonucleoprotein complex;ribosome;small ribosomal subunit;vesicle	Ribosome	4	4	4	21,6	21,6	21,6	25,371	0	26,535	61611000	11	E9PL09;P23396;E9PPU1;H0YEU2;F2Z2S8;H0YF32;H0YCJ7;E9PQ96;E9PSF4;E9PJH4;E9PK82	E9PL09;P23396;E9PPU1;H0YEU2;F2Z2S8;H0YF32;H0YCJ7	40S ribosomal protein S3	RPS3
22.9498825073242	22.4471035003662	22.9205074310303	22.5093002319336	22.9829235076904	22.4959716796875	22.2933654785156	NaN	NaN	21.9379386901855	22.2829151153564	21.9271621704102				0	cell part;cytosol;extracellular organelle;intracellular membrane-bounded organelle;intracellular organelle;nucleus;organelle;vesicle		4	4	4	5,1	5,1	5,1	102,99	0	24,108	115490000	8	E9PLK3;P55786;A6NEC2;H0YCQ5;E9PJ74;H0YDG0;E9PRQ5	E9PLK3;P55786;A6NEC2	Puromycin-sensitive aminopeptidase;Puromycin-sensitive aminopeptidase-like protein	NPEPPS;NPEPPSL1
21.5523433685303	21.5831604003906	21.4406051635742	23.2987995147705	23.645263671875	22.7791042327881	25.6943168640137	26.0580863952637	25.4770736694336	22.5484428405762	23.2183322906494	22.8948574066162				0	cell part;cell surface;cytoplasm;cytoplasmic membrane-bounded vesicle;extracellular matrix;extracellular region;extracellular space;intracellular membrane-bounded organelle;intracellular organelle;membrane;organelle;proteinaceous extracellular matrix;vesicle		5	5	5	28,9	28,9	28,9	17,47	0	68,465	217630000	30	F5GY03;P09486;E5RK62	F5GY03;P09486;E5RK62	SPARC	SPARC
18.4894237518311	17.7941112518311	18.3810195922852	17.8900032043457	17.7757778167725	NaN	NaN	NaN	NaN	NaN	NaN	NaN				0	cell part;cell surface;cytoplasm;cytoplasmic membrane-bounded vesicle;extracellular organelle;intracellular membrane-bounded organelle;intracellular organelle;membrane;nucleoplasm;nucleus;organelle;plasma membrane;vesicle	Protein digestion and absorption	2	2	2	4,3	4,3	4,3	64,872	0	12,26	7355900	2	F5GZS6;J3KPF3;P08195;H0YFX4;F5GZI0	F5GZS6;J3KPF3;P08195;H0YFX4;F5GZI0	4F2 cell-surface antigen heavy chain	SLC3A2
NaN	22.2242622375488	21.9863128662109	NaN	NaN	NaN	NaN	NaN	NaN	NaN	NaN	NaN				0	cell part;cytosol;extracellular organelle;intracellular membrane-bounded organelle;intracellular organelle;membrane;mitochondrion;organelle;vesicle	One carbon pool by folate	4	4	4	4,5	4,5	4,5	110,61	0	32,389	20389000	5	F5H2F4;P11586;V9GYY3	F5H2F4;P11586	C-1-tetrahydrofolate synthase, cytoplasmic;Methylenetetrahydrofolate dehydrogenase;Methenyltetrahydrofolate cyclohydrolase;Formyltetrahydrofolate synthetase;C-1-tetrahydrofolate synthase, cytoplasmic, N-terminally processed	MTHFD1
23.933910369873	23.2616958618164	21.7758731842041	22.4675712585449	22.4394130706787	24.7491397857666	20.7521362304688	21.2374229431152	21.0016136169434	20.9728107452393	NaN	20.1879749298096				0	cell part;cytoplasm;cytosol;endosome;extracellular organelle;extracellular region;intracellular membrane-bounded organelle;intracellular organelle;macromolecular complex;nucleus;organelle;protein complex;vesicle	Gap junction;Pathogenic Escherichia coli infection;Phagosome	10	10	5	24,3	24,3	13,5	57,73	0	75,236	245730000	43	F5H5D3;Q9BQE3;Q71U36;P68363;A0A1W2PQM2;Q13748;Q6PEY2;F8VVB9;C9J2C0;P68366;V9GZ17;F8VRZ4;F8VS66;F8VQQ4;F8VRK0;F8VX09;F8VWV9;C9JDS9;A6NHL2;F8VXZ7;F8W0F6;Q9H853	F5H5D3;Q9BQE3;Q71U36;P68363;A0A1W2PQM2;Q13748;Q6PEY2;F8VVB9;C9J2C0;P68366	Tubulin alpha-1C chain;Tubulin alpha-1A chain;Tubulin alpha-1B chain;Tubulin alpha-3C/D chain;Tubulin alpha-3E chain;Tubulin alpha-4A chain	TUBA1C;TUBA1A;TUBA1B;TUBA3C;TUBA3E;TUBA8;TUBA4A
23.6727123260498	23.5723056793213	22.2982959747314	21.1749324798584	22.0246887207031	21.898551940918	21.0851154327393	20.810567855835	21.0911979675293	NaN	20.5108451843262	NaN				0	cell part;cytoplasm;cytoskeleton;extracellular organelle;intracellular non-membrane-bounded organelle;intracellular organelle;macromolecular complex;membrane;nucleoplasm;organelle;ribonucleoprotein complex;spliceosomal complex;vesicle	Spliceosome	5	5	5	42,1	42,1	42,1	16,536	0	32,315	153690000	19	F8VTQ5;F8W6I7;P09651;F8VZ49;Q32P51;F8VYN5;F8W646;H0YH80	F8VTQ5;F8W6I7;P09651;F8VZ49;Q32P51	Heterogeneous nuclear ribonucleoprotein A1;Heterogeneous nuclear ribonucleoprotein A1, N-terminally processed;Heterogeneous nuclear ribonucleoprotein A1-like 2	HNRNPA1;HNRNPA1L2
21.0460681915283	21.6786975860596	21.4005680084229	NaN	21.2321014404297	22.2063674926758	20.8818874359131	20.9479942321777	20.8971862792969	20.4849281311035	NaN	NaN				0	cell part;cytoplasm;cytosol;extracellular organelle;intracellular membrane-bounded organelle;intracellular non-membrane-bounded organelle;intracellular organelle;macromolecular complex;membrane;nucleus;organelle;ribonucleoprotein complex;ribosome;vesicle	Ribosome	4	4	4	17,8	17,8	17,8	27,187	0	28,001	49120000	13	F8VU65;P05388;F8VPE8;G3V210;F8VW21;F8VWS0;Q8NHW5;F8VS58;F8VQY6;F8VRK7;F8VZS0;F8VWV4	F8VU65;P05388;F8VPE8;G3V210;F8VW21;F8VWS0;Q8NHW5;F8VS58;F8VQY6;F8VRK7;F8VZS0	60S acidic ribosomal protein P0;60S acidic ribosomal protein P0-like	RPLP0;RPLP0P6
22.5844917297363	20.6390933990479	20.8283443450928	20.5993251800537	20.9738636016846	20.5280265808105	NaN	NaN	20.5556221008301	NaN	NaN	NaN				0	cell part;cytoplasm;Golgi apparatus;intracellular membrane-bounded organelle;intracellular non-membrane-bounded organelle;intracellular organelle;macromolecular complex;membrane;nuclear pore;nucleolus;nucleoplasm;nucleus;organelle;protein complex		5	5	5	5,6	5,6	5,6	123,75	0	29,328	34927000	7	H0Y8C6;O00410	H0Y8C6;O00410	Importin-5	IPO5
NaN	22.2937297821045	23.3181037902832	22.6728420257568	23.5577735900879	21.783088684082	NaN	NaN	NaN	NaN	NaN	NaN				0	cell body;cell part;cell projection;cytoplasm;cytoskeleton;cytosol;extracellular organelle;intracellular membrane-bounded organelle;intracellular non-membrane-bounded organelle;intracellular organelle;macromolecular complex;midbody;mitochondrion;neuron projection;neuronal cell body;nucleus;organelle;ribonucleoprotein complex;small ribosomal subunit;vesicle	Measles	3	3	3	19,7	19,7	19,7	21,934	0	22,513	55952000	10	H0YAF8;J3KPE3;H0Y8W2;P63244;D6RAU2;E9PD14;D6RFX4;D6RFZ9;D6RHH4;D6R9Z1;H0YAM7;D6R9L0;H0Y9P0;D6RF23;D6RAC2;D6REE5	H0YAF8;J3KPE3;H0Y8W2;P63244;D6RAU2;E9PD14;D6RFX4;D6RFZ9;D6RHH4;D6R9Z1;H0YAM7;D6R9L0	Guanine nucleotide-binding protein subunit beta-2-like 1;Guanine nucleotide-binding protein subunit beta-2-like 1, N-terminally processed	GNB2L1
NaN	20.9587230682373	20.9841232299805	21.4618396759033	21.6475944519043	20.9106426239014	21.733678817749	21.7779216766357	NaN	NaN	NaN	NaN				0	cell part;cytoplasm;cytoplasmic membrane-bounded vesicle;cytosol;endoplasmic reticulum;extracellular matrix;extracellular organelle;extracellular region;extracellular space;Golgi apparatus;intracellular membrane-bounded organelle;intracellular organelle;macromolecular complex;membrane;mitochondrion;nucleus;organelle;vesicle		2	2	2	12,3	12,3	12,3	33,419	0	13,353	29324000	15	H0YC35;P10909;H0YAS8;E7ERK6;H0YLK8	H0YC35;P10909;H0YAS8;E7ERK6;H0YLK8	Clusterin;Clusterin;Clusterin beta chain;Clusterin alpha chain	CLU
NaN	19.4018707275391	NaN	19.5284843444824	NaN	20.2389965057373	NaN	NaN	19.487756729126	NaN	NaN	NaN				0	cell part;cell surface;extracellular organelle;intracellular membrane-bounded organelle;intracellular non-membrane-bounded organelle;intracellular organelle;macromolecular complex;membrane;mitochondrion;nucleus;organelle;plasma membrane;protein complex;proton-transporting two-sector ATPase complex;vesicle	Alzheimer's disease;Huntington's disease;Oxidative phosphorylation;Parkinson's disease	4	4	4	15,2	15,2	15,2	38,138	0	23,511	21381000	4	H0YH81;P06576;F8W079;F8W0P7;H0YI37	H0YH81;P06576;F8W079;F8W0P7	ATP synthase subunit beta;ATP synthase subunit beta, mitochondrial	ATP5B
NaN	NaN	NaN	NaN	NaN	NaN	21.3596038818359	21.4898357391357	21.2917079925537	23.7027149200439	22.4654064178467	23.4122219085693				0	cell part;extracellular matrix;extracellular organelle;extracellular region;extracellular space;organelle;vesicle	Protein digestion and absorption	2	2	2	6,4	6,4	6,4	70,733	0	15,763	20049000	11	H7BXV5;P39060;H7C457	H7BXV5;P39060;H7C457	Collagen alpha-1(XVIII) chain;Endostatin	COL18A1
19.4463729858398	19.9674739837646	20.3298091888428	21.4879245758057	21.3271789550781	NaN	23.0766429901123	23.1199703216553	21.4045238494873	20.898811340332	NaN	20.5207576751709				0	cell part;endoplasmic reticulum;extracellular matrix;extracellular organelle;extracellular space;intracellular membrane-bounded organelle;intracellular organelle;organelle;proteinaceous extracellular matrix;vesicle		2	2	2	2,8	2,8	2,8	79,755	0	17,144	34944000	20	H7C1W1;Q92626	H7C1W1;Q92626	Peroxidasin homolog	PXDN
NaN	NaN	NaN	NaN	NaN	NaN	NaN	NaN	NaN	NaN	21.8398818969727	23.2042942047119				0	cell part;cytoplasm;extracellular space		5	2	2	8,7	3,2	3,2	70,449	0	12,638	9206100	6	J3KMX3;P02771	J3KMX3;P02771	Alpha-fetoprotein	AFP
26.2152500152588	26.6738433837891	26.1627902984619	24.9070148468018	26.7283229827881	26.139949798584	23.7486801147461	24.1221046447754	24.8296794891357	24.1679077148438	24.7196273803711	24.5636615753174				0	cell part;cytoskeleton;cytosol;extracellular organelle;extracellular region;extracellular space;intracellular membrane-bounded organelle;intracellular non-membrane-bounded organelle;intracellular organelle;membrane;nucleus;organelle;vesicle	Carbon fixation in photosynthetic organisms;Fructose and mannose metabolism;Glycolysis / Gluconeogenesis;Pentose phosphate pathway	14	14	13	45,7	45,7	43,8	39,817	0	121,45	942230000	86	J3KPS3;P04075;H3BQN4;H3BPS8;H3BUH7;H3BR04;H3BMQ8;H3BU78;H3BR68;A0A087WXX2;P05062	J3KPS3;P04075;H3BQN4;H3BPS8;H3BUH7;H3BR04;H3BMQ8	Fructose-bisphosphate aldolase;Fructose-bisphosphate aldolase A	ALDOA
21.8947105407715	23.1332015991211	22.5978260040283	22.0871562957764	23.8042011260986	22.2252635955811	NaN	21.4380683898926	21.5724201202393	NaN	NaN	21.1486759185791				0	cell part;cytosol;extracellular organelle;intracellular membrane-bounded organelle;intracellular organelle;nucleus;organelle;vesicle	Glutathione metabolism;Pentose phosphate pathway	4	4	4	36,2	36,2	36,2	17,293	0	33,151	64578000	10	K7EMN2;K7EM49;P52209;K7EPF6	K7EMN2;K7EM49;P52209;K7EPF6	6-phosphogluconate dehydrogenase, decarboxylating	PGD
19.7897891998291	19.5907440185547	19.5190486907959	NaN	NaN	NaN	NaN	NaN	NaN	NaN	NaN	NaN				0	cell part;cytosol;extracellular organelle;intracellular non-membrane-bounded organelle;intracellular organelle;macromolecular complex;membrane;organelle;ribonucleoprotein complex;ribosome;small ribosomal subunit;vesicle	Ribosome	2	2	2	34	34	34	5,5575	0	12,06	16563000	8	M0QX76;M0R1M5;M0R3H0;M0R210;Q6IPX4;P62249	M0QX76;M0R1M5;M0R3H0;M0R210;Q6IPX4;P62249	40S ribosomal protein S16	RPS16
NaN	19.8008403778076	21.4410610198975	26.0760631561279	26.3211688995361	26.6588077545166	24.0576324462891	23.9868507385254	23.3924427032471	NaN	NaN	NaN				0	cell part;extracellular matrix;extracellular region;extracellular space	TGF-beta signaling pathway	8	8	8	29,2	29,2	29,2	40,92	0	62,709	278350000	50	O00292;O75610;A0A087WW09	O00292;O75610	Left-right determination factor 2;Left-right determination factor 1	LEFTY2;LEFTY1
21.8708324432373	21.9894351959229	23.1185283660889	21.1853771209717	21.2591991424561	20.5375366210938	19.8116035461426	20.1858005523682	20.3206939697266	20.3383235931396	NaN	NaN				0	cell part;cytoplasm;cytosol;intracellular membrane-bounded organelle;intracellular non-membrane-bounded organelle;intracellular organelle;kinetochore;macromolecular complex;membrane;nuclear envelope;nucleolus;nucleoplasm;nucleus;organelle;protein complex;ribonucleoprotein complex	Ribosome biogenesis in eukaryotes;RNA transport	4	4	4	4,3	4,3	4,3	123,38	0	28,113	58128000	20	O14980;H7BZC5;C9IZS4;C9JQ02;C9JV99;C9J673;C9JKM9	O14980	Exportin-1	XPO1
NaN	NaN	23.9032497406006	24.1570739746094	23.4011936187744	NaN	NaN	NaN	NaN	NaN	NaN	NaN				0	cell part;cytosol;Golgi apparatus;intracellular membrane-bounded organelle;intracellular organelle;organelle	Inositol phosphate metabolism;Phosphatidylinositol signaling system	2	2	2	2,4	2,4	2,4	104,74	0	12,06	48380000	4	O15327;E9PG59;E9PHC0;D6RJC3;E7EQN9	O15327;E9PG59;E9PHC0;D6RJC3;E7EQN9	Type II inositol 3,4-bisphosphate 4-phosphatase	INPP4B
23.7086200714111	24.2717037200928	24.4510478973389	23.1848468780518	23.9320201873779	23.8396129608154	21.5154724121094	21.7584533691406	21.936429977417	20.6947250366211	21.3984832763672	21.1120986938477				0	cell part;cell projection;cytoplasm;cytoskeleton;extracellular organelle;extracellular region;extracellular space;intracellular membrane-bounded organelle;intracellular non-membrane-bounded organelle;intracellular organelle;macromolecular complex;neuron projection;nucleus;organelle;protein complex;pseudopodium;ribonucleoprotein complex;vesicle	Adherens junction;Amoebiasis;Arrhythmogenic right ventricular cardiomyopathy (ARVC);Focal adhesion;Leukocyte transendothelial migration;Regulation of actin cytoskeleton;Systemic lupus erythematosus;Tight junction	8	8	3	11,7	11,7	5,4	104,85	0	103,19	211760000	46	O43707;H7C144;F5GXS2	O43707;H7C144;F5GXS2	Alpha-actinin-4	ACTN4
NaN	24.1106014251709	24.0065021514893	25.5975303649902	23.052417755127	NaN	22.3932018280029	22.5547332763672	NaN	NaN	22.1804981231689	NaN				0	cell part;extracellular organelle;extracellular space;intracellular membrane-bounded organelle;intracellular organelle;macromolecular complex;nucleoplasm;nucleosome;nucleus;organelle;vesicle	Systemic lupus erythematosus	2	2	2	15,1	15,1	15,1	18,804	0	106,27	102590000	25	U3KQK0;Q99880;Q99879;Q99877;Q93079;Q5QNW6;P62807;P58876;P57053;O60814;Q8N257;Q16778;P33778;P23527;P06899	U3KQK0;Q99880;Q99879;Q99877;Q93079;Q5QNW6;P62807;P58876;P57053;O60814;Q8N257;Q16778;P33778;P23527;P06899	Histone H2B;Histone H2B type 1-L;Histone H2B type 1-M;Histone H2B type 1-N;Histone H2B type 1-H;Histone H2B type 2-F;Histone H2B type 1-C/E/F/G/I;Histone H2B type 1-D;Histone H2B type F-S;Histone H2B type 1-K;Histone H2B type 3-B;Histone H2B type 2-E;Histone H2B type 1-B;Histone H2B type 1-O;Histone H2B type 1-J	HIST1H2BN;HIST1H2BL;HIST1H2BM;HIST1H2BH;HIST2H2BF;HIST1H2BC;HIST1H2BD;H2BFS;HIST1H2BK;HIST3H2BB;HIST2H2BE;HIST1H2BB;HIST1H2BO;HIST1H2BJ
24.9750442504883	25.8465404510498	25.9392127990723	23.8303565979004	25.3946342468262	24.7002296447754	22.3879814147949	22.3933067321777	24.3467864990234	22.0043258666992	22.478796005249	21.875602722168				0	cell part;cytoplasm;cytosol;extracellular organelle;intracellular membrane-bounded organelle;intracellular organelle;microbody;mitochondrion;organelle;peroxisome;vesicle	Carbon fixation pathways in prokaryotes;Citrate cycle (TCA cycle);Glutathione metabolism;Peroxisome	8	8	8	22,9	22,9	22,9	46,659	0	67,296	354860000	48	O75874;C9J4N6;C9JJE5;C9JLU6;P48735	O75874;C9J4N6	Isocitrate dehydrogenase [NADP] cytoplasmic	IDH1
NaN	NaN	21.105655670166	22.3856391906738	22.1684894561768	21.5103626251221	23.1634006500244	23.4854202270508	21.9786529541016	21.9930686950684	22.0879001617432	22.0652961730957				0	cell part;cell projection;extracellular organelle;intracellular membrane-bounded organelle;intracellular organelle;membrane;nucleus;organelle;vesicle		4	4	4	6,3	6,3	6,3	88,039	0	30,086	54120000	15	Q5SR54;O94985	Q5SR54;O94985	Calsyntenin-1;Soluble Alc-alpha;CTF1-alpha	CLSTN1
NaN	23.4791412353516	23.4975318908691	24.2915115356445	24.3933582305908	27.7163333892822	22.1001472473145	NaN	22.9986057281494	NaN	NaN	NaN				0	extracellular region;extracellular space	Wnt signaling pathway	6	6	6	42,3	42,3	42,3	30,083	0	50,1	297050000	21	O95813	O95813	Cerberus	CER1
25.6595153808594	25.7622299194336	25.7446308135986	25.5417366027832	26.260009765625	25.8483085632324	24.479944229126	24.4889793395996	25.8478546142578	25.0528736114502	25.0047035217285	24.3332672119141				0	cell part;cytosol;extracellular organelle;intracellular membrane-bounded organelle;intracellular organelle;membrane;mitochondrion;nucleus;organelle;vesicle	Cysteine and methionine metabolism;Glycolysis / Gluconeogenesis;Propanoate metabolism;Pyruvate metabolism	10	9	9	31,3	27,7	27,7	36,688	0	97,094	674670000	90	P00338;F5GYU2;F5GXY2;F5GXH2;F5H5J4;F5H6W8;F5GZQ4;F5H8H6;F5GXC7;F5GWW2;F5GXU1	P00338;F5GYU2;F5GXY2;F5GXH2	L-lactate dehydrogenase A chain	LDHA
NaN	NaN	NaN	NaN	NaN	NaN	24.5768089294434	24.5733451843262	23.2166004180908	23.730447769165	23.3214111328125	23.4230365753174				0	cell part;extracellular matrix;extracellular region;extracellular space	Amoebiasis;ECM-receptor interaction;Focal adhesion;Protein digestion and absorption	3	3	3	2,6	2,6	2,6	141,78	0	28,154	81051000	8	P02458	P02458	Collagen alpha-1(II) chain;Collagen alpha-1(II) chain;Chondrocalcin	COL2A1
23.2967014312744	24.6783103942871	24.1540641784668	26.9689502716064	26.7992172241211	26.0243053436279	27.8479251861572	27.6634979248047	28.0119590759277	27.0752067565918	26.5683670043945	26.8034114837646				0	cell body;cell part;cell projection;cytoplasm;endoplasmic reticulum;endosome;extracellular matrix;extracellular organelle;extracellular region;extracellular space;Golgi apparatus;intracellular membrane-bounded organelle;intracellular organelle;lysosome;macromolecular complex;membrane;neuron projection;neuronal cell body;nuclear envelope;nucleus;organelle;plasma membrane;protein complex;vacuole;ve…	Alzheimer's disease	14	14	14	49,2	49,2	49,2	36,154	0	323,31	1432800000	212	P02649;H0Y7L5;E9PEV4;E7ERP7;CON__Q03247	P02649;H0Y7L5	Apolipoprotein E	APOE
25.0991268157959	26.3637771606445	25.3623561859131	29.2285079956055	29.0598468780518	27.5175075531006	30.1302585601807	30.0432262420654	30.0867671966553	30.004638671875	29.3553771972656	29.5929718017578				0	cell part;extracellular matrix;extracellular organelle;extracellular region;extracellular space;intracellular membrane-bounded organelle;intracellular organelle;macromolecular complex;organelle;protein complex;vesicle	Amoebiasis;Bacterial invasion of epithelial cells;ECM-receptor interaction;Focal adhesion;Pathways in cancer;Regulation of actin cytoskeleton;Small cell lung cancer	50	50	50	33,9	33,9	33,9	262,62	0	323,31	6285800000	759	P02751;H0Y7Z1;H0Y4K8	P02751;H0Y7Z1	Fibronectin;Anastellin;Ugl-Y1;Ugl-Y2;Ugl-Y3	FN1
NaN	22.3422889709473	21.4548797607422	NaN	NaN	NaN	19.5241279602051	20.0758762359619	NaN	21.1625099182129	21.2889518737793	23.7106189727783				0	cell body;cell part;cytoplasm;cytoskeleton;cytosol;endosome;extracellular organelle;extracellular region;extracellular space;Golgi apparatus;intracellular membrane-bounded organelle;intracellular non-membrane-bounded organelle;intracellular organelle;macromolecular complex;membrane;neuronal cell body;organelle;plasma membrane;vesicle	Fat digestion and absorption;Vitamin digestion and absorption	10	10	8	2,7	2,7	2,1	515,6	0	62,813	20093000	23	P04114;A8MUN2	P04114	Apolipoprotein B-100;Apolipoprotein B-48	APOB
NaN	20.8567333221436	NaN	21.1435775756836	20.8409957885742	20.9399127960205	24.2690658569336	20.9939670562744	NaN	NaN	NaN	NaN				0	cell part;cytoskeleton;cytosol;extracellular organelle;extracellular region;extracellular space;intracellular membrane-bounded organelle;intracellular non-membrane-bounded organelle;intracellular organelle;membrane;nucleus;organelle;plasma membrane;vesicle		6	6	6	52,7	52,7	52,7	10,834	0	40,855	525890000	15	P05109	P05109	Protein S100-A8;Protein S100-A8, N-terminally processed	S100A8
NaN	25.0441017150879	25.6408309936523	24.5048828125	23.8947658538818	NaN	NaN	NaN	NaN	NaN	NaN	NaN				0	cell part;cytoplasm;cytosol;extracellular organelle;extracellular space;organelle;vesicle	PPAR signaling pathway	2	2	2	15,7	15,7	15,7	10,17	0	45,147	101860000	12	S4R3A2;S4R371;P05413	S4R3A2;S4R371;P05413	Fatty acid-binding protein, heart	FABP3
NaN	NaN	NaN	NaN	NaN	NaN	20.7154026031494	20.8962993621826	NaN	22.0767574310303	21.6039943695068	24.6034278869629				0	cell part;cytosol;endosome;extracellular organelle;extracellular region;extracellular space;intracellular membrane-bounded organelle;intracellular organelle;macromolecular complex;organelle;vesicle		5	5	4	15,9	15,9	12,9	45,398	0	48,1	26690000	11	P06727	P06727	Apolipoprotein A-IV	APOA4
24.6731967926025	22.4530963897705	22.7671279907227	22.0931987762451	22.0485324859619	21.6659202575684	NaN	20.4580383300781	21.000789642334	NaN	20.92795753479	NaN				0	cell part;centrosome;cytoplasm;cytosol;intracellular membrane-bounded organelle;intracellular non-membrane-bounded organelle;intracellular organelle;macromolecular complex;membrane;microtubule organizing center;nucleolus;nucleoplasm;nucleus;organelle;ribonucleoprotein complex		4	4	4	22,1	22,1	22,1	32,575	0	32,556	192070000	18	P06748;E5RI98	P06748;E5RI98	Nucleophosmin	NPM1
NaN	20.3715648651123	NaN	24.4620761871338	25.4408531188965	23.9765739440918	23.0192184448242	22.3996829986572	24.0193710327148	20.7177467346191	20.9855842590332	20.7931270599365				0	cell part;cytoplasmic membrane-bounded vesicle;cytosol;extracellular matrix;extracellular region;extracellular space;intracellular membrane-bounded organelle;intracellular organelle;organelle;synapse;vesicle		8	8	8	24,9	24,9	24,9	44,002	0	59,756	98168000	32	P07093;C9JN98	P07093;C9JN98	Glia-derived nexin	SERPINE2
26.4607486724854	26.9975509643555	26.7099094390869	26.8026733398438	27.2606925964355	26.340145111084	24.9140148162842	25.2586803436279	25.9862442016602	24.7944660186768	24.8997058868408	24.0759410858154				0	cell part;cytoplasm;cytosol;extracellular organelle;intracellular membrane-bounded organelle;intracellular organelle;membrane;mitochondrion;organelle;vesicle	Cysteine and methionine metabolism;Glycolysis / Gluconeogenesis;Propanoate metabolism;Pyruvate metabolism	12	12	11	39,5	39,5	35,9	36,638	0	161,58	1447800000	163	P07195;A8MW50;C9J7H8;F5H793;F5H5G7;F5H155;G3XAP5;F5H245;P07864	P07195;A8MW50;C9J7H8	L-lactate dehydrogenase B chain;L-lactate dehydrogenase	LDHB
22.4048099517822	24.9166126251221	22.9703559875488	23.9693031311035	22.3253135681152	24.0492630004883	20.6535091400146	20.8339900970459	20.3515396118164	NaN	NaN	20.5434970855713				0	cell body;cell part;cell projection;cilium;cytoplasm;cytoskeleton;cytosol;extracellular organelle;intracellular membrane-bounded organelle;intracellular non-membrane-bounded organelle;intracellular organelle;macromolecular complex;neuron projection;neuronal cell body;nucleus;organelle;protein complex;vesicle	Gap junction;Pathogenic Escherichia coli infection;Phagosome	12	12	2	39,2	39,2	6,3	47,766	0	115,89	236220000	68	Q5JP53;P07437;Q5ST81;P04350;A0A0B4J269;Q13509;K7ESM5;Q9BUF5;G3V2A3;A0A075B736;Q5SQY0;Q3ZCM7;A6NNZ2;M0R1I1;G3V5W4;M0QY85;G3V2R8;M0R042;G3V3R4;M0R2D3;M0QZL7;M0QYM7;G3V2N6;M0R278;CON__ENSEMBL:ENSBTAP00000025008;Q9H4B7	Q5JP53;P07437;Q5ST81;P04350;A0A0B4J269;Q13509	Tubulin beta chain;Tubulin beta-4A chain;Tubulin beta-3 chain	TUBB;TUBB4A;TUBB3
25.7893009185791	20.1639842987061	19.7170429229736	20.2828578948975	20.1602954864502	20.6480770111084	19.5994873046875	NaN	NaN	NaN	NaN	NaN				0	cell cortex;cell part;cell projection;cytoplasm;cytoskeleton;cytosol;extracellular organelle;intracellular membrane-bounded organelle;intracellular non-membrane-bounded organelle;intracellular organelle;membrane;neuron projection;nucleus;organelle;synapse;vesicle	Regulation of actin cytoskeleton;Shigellosis	6	6	6	55,7	55,7	55,7	15,054	0	55,248	273700000	19	P07737;K7EJ44;I3L3D5;CON__P02584	P07737;K7EJ44;I3L3D5	Profilin-1	PFN1
26.0116291046143	26.8791179656982	24.2957210540771	25.1381340026855	26.068826675415	25.2835502624512	23.7790641784668	23.5987796783447	24.192497253418	23.05690574646	22.9377956390381	21.7880363464355				0	cell body;cell part;cell projection;cell surface;cytoplasm;cytoplasmic membrane-bounded vesicle;cytosol;extracellular matrix;extracellular organelle;extracellular region;intracellular membrane-bounded organelle;intracellular organelle;macromolecular complex;membrane;mitochondrion;neuron projection;neuronal cell body;nucleoplasm;nucleus;organelle;plasma membrane;protein complex;vesicle	Antigen processing and presentation;NOD-like receptor signaling pathway;Pathways in cancer;Plant-pathogen interaction;Progesterone-mediated oocyte maturation;Prostate cancer;Protein processing in endoplasmic reticulum	23	12	12	35,7	19,1	19,1	84,659	0	300,54	814500000	106	P07900;G3V2J8;Q14568;Q58FF6;Q58FG0;Q58FG1	P07900	Heat shock protein HSP 90-alpha	HSP90AA1
28.4418983459473	28.7311096191406	26.4696884155273	26.8780651092529	27.9960422515869	27.7736682891846	25.7788887023926	25.8640308380127	26.2200374603271	24.6922149658203	24.916431427002	23.9237937927246				0	cell part;cytoplasm;cytoplasmic membrane-bounded vesicle;cytosol;extracellular organelle;intracellular membrane-bounded organelle;intracellular organelle;membrane;mitochondrion;nucleoplasm;organelle;vesicle	Antigen processing and presentation;NOD-like receptor signaling pathway;Pathways in cancer;Plant-pathogen interaction;Progesterone-mediated oocyte maturation;Prostate cancer;Protein processing in endoplasmic reticulum	29	29	13	43,8	43,8	21,4	83,263	0	323,31	4426400000	282	P08238;Q58FF7;F8W026;Q96GW1;A0A1W2PRR1	P08238	Heat shock protein HSP 90-beta	HSP90AB1
20.3540172576904	21.4922828674316	20.5381050109863	21.8157749176025	20.8686866760254	22.2047863006592	19.3296775817871	19.8918876647949	20.4363422393799	NaN	20.034158706665	NaN				0	cell part;cytoplasm;extracellular organelle;intracellular;membrane;organelle;vesicle		5	5	5	17,8	17,8	17,8	35,936	0	31,987	30504000	13	P08758;D6RBL5;D6RBE9;E9PHT9	P08758;D6RBL5;D6RBE9	Annexin A5;Annexin	ANXA5
24.3667297363281	24.26806640625	24.4455013275146	23.1419582366943	24.0932140350342	25.9638671875	24.4758071899414	24.2393608093262	24.7368602752686	23.6226558685303	23.5332641601563	23.3078594207764				0	cell part;cytoplasm;cytosol;extracellular organelle;extracellular space;intracellular;intracellular membrane-bounded organelle;intracellular organelle;macromolecular complex;membrane;mitochondrion;nucleus;organelle;plasma membrane;protein complex;vesicle	Drug metabolism - cytochrome P450;Glutathione metabolism;Metabolism of xenobiotics by cytochrome P450	6	6	6	43,3	43,3	43,3	23,356	0	323,31	438400000	63	P09211;A8MX94;A0A087X243;A0A087X2E9	P09211;A8MX94	Glutathione S-transferase P	GSTP1
22.2087802886963	23.0255336761475	21.3238868713379	20.8312091827393	21.6527652740479	NaN	20.2529201507568	20.2951316833496	21.1583232879639	NaN	21.30446434021	20.6720218658447				0	cell part;cell projection;cytoskeleton;cytosol;extracellular organelle;intracellular membrane-bounded organelle;intracellular non-membrane-bounded organelle;intracellular organelle;mitochondrion;neuron projection;organelle;vesicle	Carbon fixation in photosynthetic organisms;Fructose and mannose metabolism;Glycolysis / Gluconeogenesis;Pentose phosphate pathway	3	2	2	12,6	10,7	10,7	39,455	0	52,106	50622000	6	P09972;K7EKH5;J3KSV6;J3QKP5;A8MVZ9;C9J8F3	P09972;K7EKH5;J3KSV6;J3QKP5;A8MVZ9	Fructose-bisphosphate aldolase C;Fructose-bisphosphate aldolase	ALDOC
NaN	NaN	NaN	NaN	NaN	NaN	24.0694007873535	23.9751758575439	24.2570266723633	23.637767791748	23.1487674713135	23.4429092407227				0	extracellular matrix;extracellular region;proteinaceous extracellular matrix		5	5	5	15,3	15,3	15,3	40,165	0	46,827	64863000	21	P10915;D6RBS1;D6RC59;D6RAK7;D6RBX9;D6RFI7;D6RG04	P10915	Hyaluronan and proteoglycan link protein 1	HAPLN1
21.1055278778076	23.3307399749756	23.3790149688721	22.1756038665771	23.1033515930176	21.93678855896	20.2489891052246	20.4086246490479	20.8037281036377	NaN	NaN	NaN				0	cell part;centrosome;cytoplasm;DNA replication factor C complex;extracellular organelle;intracellular membrane-bounded organelle;intracellular non-membrane-bounded organelle;intracellular organelle;macromolecular complex;microtubule organizing center;nucleoplasm;nucleus;organelle;protein complex;vesicle	Base excision repair;Cell cycle;DNA replication;Mismatch repair;Nucleotide excision repair	2	2	2	10	10	10	28,768	0	31,263	66900000	19	P12004	P12004	Proliferating cell nuclear antigen	PCNA
20.2851181030273	20.2398128509521	19.8602695465088	19.717378616333	19.663064956665	20.0891304016113	19.8911304473877	NaN	19.756311416626	NaN	NaN	NaN				0	cell part;cytosol;extracellular organelle;intracellular membrane-bounded organelle;intracellular organelle;mitochondrion;organelle;vesicle	Arginine and proline metabolism	2	2	2	6	6	6	42,644	0	13,699	16805000	7	P12277;G3V461;G3V4N7	P12277;G3V461;G3V4N7	Creatine kinase B-type	CKB
26.4572772979736	26.362606048584	26.0237121582031	24.0405120849609	26.2652606964111	23.6458148956299	22.6990966796875	22.500524520874	22.5043621063232	21.5842609405518	21.1262855529785	21.1682758331299				0	cell part;cytoplasm;cytosol;extracellular organelle;intracellular membrane-bounded organelle;intracellular organelle;macromolecular complex;membrane;nucleus;organelle;plasma membrane;polysome;ribonucleoprotein complex;vesicle		17	17	17	23,3	23,3	23,3	95,337	0	140,03	916790000	70	P13639;K7EJ74;K7EP67;Q15029	P13639	Elongation factor 2	EEF2
25.4784622192383	26.0002613067627	26.1869945526123	25.0800552368164	25.7316150665283	22.8863048553467	21.4079494476318	21.6567420959473	22.3057460784912	20.3498115539551	21.9499530792236	NaN				0	cell part;cytoskeleton;cytosol;extracellular organelle;extracellular region;intracellular non-membrane-bounded organelle;intracellular organelle;macromolecular complex;membrane;organelle;plasma membrane;protein complex;vesicle	Adherens junction;Amoebiasis;Bacterial invasion of epithelial cells;Focal adhesion;Leukocyte transendothelial migration;Regulation of actin cytoskeleton;Shigellosis	18	18	18	22,2	22,2	22,2	123,8	0	174,55	622130000	90	P18206;A0A096LPE1	P18206	Vinculin	VCL
24.0084705352783	23.9743003845215	24.9783210754395	22.0884838104248	22.4436187744141	22.2987995147705	21.6509704589844	21.60964012146	21.5926342010498	21.2148971557617	21.0219478607178	NaN				0	cell cortex;cell part;extracellular organelle;intracellular membrane-bounded organelle;intracellular non-membrane-bounded organelle;intracellular organelle;macromolecular complex;membrane;nucleolus;nucleoplasm;nucleus;organelle;ribonucleoprotein complex;vesicle	Pathogenic Escherichia coli infection	10	10	10	17	17	17	76,613	0	98,639	312600000	37	P19338;H7BY16	P19338;H7BY16	Nucleolin	NCL
25.8435478210449	27.1042957305908	27.6381683349609	24.2180061340332	24.6271171569824	23.9163398742676	20.6898708343506	22.2828578948975	23.126522064209	NaN	21.9766616821289	NaN				0	cell body;cell part;cytoplasm;cytoskeleton;cytosol;extracellular organelle;extracellular region;intracellular membrane-bounded organelle;intracellular non-membrane-bounded organelle;intracellular organelle;macromolecular complex;membrane;neuronal cell body;nucleus;organelle;plasma membrane;protein complex;vesicle	Focal adhesion;MAPK signaling pathway	28	28	26	16,5	16,5	15,7	276,55	0	236,17	756310000	70	Q5HY54;P21333;A0A087WWY3;Q60FE5;F8WE98;H0Y5C6	Q5HY54;P21333;A0A087WWY3;Q60FE5	Filamin-A	FLNA
20.8833045959473	21.9513778686523	20.9492053985596	21.0820636749268	21.6795997619629	NaN	NaN	NaN	19.6043109893799	NaN	NaN	NaN				0	cell part;cytosol;extracellular organelle;membrane;organelle;vesicle	Purine metabolism	4	4	4	14,1	14,1	14,1	47,079	0	76,206	14310000	10	P22234;D6RF62;E9PBS1	P22234;D6RF62;E9PBS1	Multifunctional protein ADE2;Phosphoribosylaminoimidazole-succinocarboxamide synthase;Phosphoribosylaminoimidazole carboxylase	PAICS
23.8467063903809	24.5054874420166	24.4423408508301	22.6063003540039	24.0019588470459	21.7693901062012	21.5945491790771	21.1274833679199	21.6261367797852	20.9344501495361	21.6394901275635	21.4375610351563				0	cell part;cytoplasm;cytosol;extracellular organelle;intracellular membrane-bounded organelle;intracellular organelle;mitochondrion;nucleus;organelle;vesicle	Parkinson's disease;Ubiquitin mediated proteolysis	11	11	11	16	16	16	117,85	0	202,81	176100000	69	P22314;Q5JRR6;Q5JRS1;Q5JRS3;Q5JRS2;Q5JRR9;Q5JRS0	P22314	Ubiquitin-like modifier-activating enzyme 1	UBA1
NaN	NaN	NaN	NaN	NaN	22.0337219238281	23.3363361358643	23.6479015350342	22.4439220428467	NaN	NaN	NaN				0	extracellular matrix;extracellular organelle;extracellular region;extracellular space;organelle;proteinaceous extracellular matrix;vesicle		6	6	1	12,7	12,7	3,3	77,213	0	59,136	89122000	17	P23142	P23142	Fibulin-1	FBLN1
24.4785251617432	25.4781856536865	24.7263488769531	24.3638591766357	24.4146099090576	22.6475505828857	21.9132747650146	21.9955883026123	22.2012901306152	20.6577892303467	20.7255897521973	20.7947940826416				0	cell part;cytoplasm;cytoplasmic membrane-bounded vesicle;cytosol;extracellular organelle;intracellular membrane-bounded organelle;intracellular organelle;organelle;vesicle	Cysteine and methionine metabolism	7	7	7	18,1	18,1	18,1	47,716	0	51,315	279210000	36	P23526	P23526	Adenosylhomocysteinase	AHCY
24.2846794128418	23.6945552825928	23.1325130462646	23.0602416992188	24.8284702301025	23.0087776184082	22.2248802185059	22.042667388916	22.0966758728027	21.6407718658447	21.1588172912598	21.2272911071777				0	cell part;cytoplasm;cytosol;extracellular organelle;intracellular membrane-bounded organelle;intracellular organelle;membrane;nucleus;organelle;vesicle		6	6	6	16,5	16,5	16,5	50,118	0	38,698	216010000	16	P26641	P26641	Elongation factor 1-gamma	EEF1G
21.9454231262207	NaN	21.4572868347168	NaN	NaN	NaN	NaN	NaN	NaN	NaN	NaN	NaN				0	cell part;cytoplasm;cytoplasmic membrane-bounded vesicle;cytosol;extracellular organelle;extracellular space;intracellular membrane-bounded organelle;intracellular organelle;lysosome;membrane;organelle;vacuole;vesicle	Methane metabolism;Phenylalanine metabolism;Phenylpropanoid biosynthesis	3	3	3	17	17	17	25,035	0	19,102	43468000	9	P30041	P30041	Peroxiredoxin-6	PRDX6
22.7664623260498	24.0363254547119	24.1969299316406	22.6904468536377	23.408597946167	21.9906120300293	22.4467258453369	21.5784683227539	21.2860774993896	22.4198017120361	20.6789989471436	21.1480541229248				0	cell part;cytosol;extracellular organelle;intracellular membrane-bounded organelle;intracellular organelle;mitochondrion;organelle;vesicle	Antigen processing and presentation	9	9	9	14,9	14,9	14,9	94,33	0	162,13	118320000	43	P34932;A0A087WTS8;A0A087WYC1	P34932;A0A087WTS8;A0A087WYC1	Heat shock 70 kDa protein 4	HSPA4
23.5409698486328	24.3761692047119	24.1462383270264	23.5672073364258	24.5654640197754	23.4546279907227	22.0278301239014	22.3160610198975	22.6420936584473	21.7565402984619	22.1065826416016	21.7100296020508				0	cell part;cytoplasm;cytosol;extracellular organelle;Golgi apparatus;intracellular membrane-bounded organelle;intracellular organelle;membrane;organelle;vesicle		9	9	9	23,1	23,1	23,1	50,663	0	81,64	178270000	44	P50395;Q5SX87;V9GYJ7;V9GYF8;Q5SX90;Q5SX86;Q5SX91;P31150	P50395;Q5SX87	Rab GDP dissociation inhibitor beta	GDI2
23.4222679138184	23.9350814819336	22.5948219299316	23.1654262542725	23.5985527038574	22.8916721343994	22.2449016571045	22.4724388122559	22.7207546234131	NaN	NaN	NaN				0	cell part;cytoplasm;cytosol;extracellular organelle;extracellular space;intracellular;intracellular membrane-bounded organelle;intracellular organelle;membrane;nucleus;organelle;vesicle	Amoebiasis	6	6	6	21	21	21	42,403	0	126,37	103330000	14	P50453;P50452;H7BXK7;C9J7N5;A0A1B0GU38;A0A0C4DGW9;P30740;O75830	P50453	Serpin B9	SERPINB9
23.0107593536377	23.552038192749	23.916431427002	23.5665111541748	23.4412651062012	23.3360633850098	NaN	NaN	NaN	NaN	NaN	NaN				0	cell part;endoplasmic reticulum;extracellular organelle;extracellular space;intracellular membrane-bounded organelle;intracellular organelle;organelle;vesicle		5	5	5	14,8	14,8	14,8	46,44	0	33,882	148690000	17	P50454;E9PKH2;H0YEP8;E9PR70;E9PPV6;E9PQ34;E9PJH8;E9PIG2;E9PRS3;E9PNX1;E9PK86;E9PMI5	P50454;E9PKH2	Serpin H1	SERPINH1
20.5336456298828	20.7082614898682	20.4528198242188	NaN	NaN	20.5597362518311	NaN	NaN	NaN	NaN	NaN	NaN				0	cell part;cytoplasm;cytosol;membrane;nucleoplasm		3	3	3	7,9	7,9	7,9	57,861	0	18,852	20502000	8	P52292;J3QLL0;J3KS65	P52292	Importin subunit alpha-1	KPNA2
21.3856925964355	NaN	21.1303768157959	NaN	21.0187606811523	NaN	NaN	NaN	20.1743850708008	NaN	NaN	NaN				0	cell part;cytoplasm;extracellular organelle;intracellular membrane-bounded organelle;intracellular organelle;membrane;nucleoplasm;nucleus;organelle;vesicle		4	4	4	6	6	6	110,42	0	26,161	30461000	10	P55060	P55060	Exportin-2	CSE1L
24.7569980621338	23.0625820159912	24.6667652130127	22.2343559265137	22.5518970489502	21.87428855896	20.288049697876	20.7249240875244	21.0487976074219	20.971549987793	20.4436435699463	19.7998924255371				0	cell part;cytoplasm;cytosol;endoplasmic reticulum;extracellular organelle;intracellular membrane-bounded organelle;intracellular organelle;lipid particle;macromolecular complex;membrane;nucleoplasm;nucleus;organelle;proteasome complex;protein complex;ubiquitin ligase complex;vesicle	Protein processing in endoplasmic reticulum	16	16	16	29,4	29,4	29,4	89,321	0	191,21	293430000	54	P55072;C9JUP7;C9IZA5	P55072	Transitional endoplasmic reticulum ATPase	VCP
23.1183071136475	23.08864402771	22.6963386535645	22.2944030761719	23.6109924316406	24.788106918335	23.1542339324951	23.6229915618896	25.0714874267578	22.9183444976807	23.0139808654785	23.4100227355957				0	cell part;cytosol;extracellular organelle;extracellular space;intracellular membrane-bounded organelle;intracellular organelle;nucleus;organelle;vesicle	Carbon fixation in photosynthetic organisms;Fructose and mannose metabolism;Glycolysis / Gluconeogenesis;Inositol phosphate metabolism	7	7	7	39,2	39,2	39,2	30,791	0	47,283	199190000	31	P60174;U3KQF3;U3KPZ0;U3KPS5	P60174	Triosephosphate isomerase	TPI1
NaN	20.5374412536621	20.5089130401611	NaN	NaN	20.0677604675293	20.0606536865234	20.1694984436035	22.0174694061279	19.9763126373291	20.1633701324463	NaN				0	cell part;cell projection;cytoplasm;extracellular organelle;intracellular membrane-bounded organelle;intracellular non-membrane-bounded organelle;intracellular organelle;macromolecular complex;membrane;nucleoplasm;nucleus;organelle;protein complex;ribonucleoprotein complex;spliceosomal complex;vesicle	Spliceosome	2	2	2	7,7	7,7	7,7	41,807	0	13,873	14725000	8	Q5T6W2;P61978	Q5T6W2;P61978	Heterogeneous nuclear ribonucleoprotein K	HNRNPK
NaN	23.2241744995117	21.9769420623779	21.0921669006348	NaN	20.4758567810059	NaN	NaN	NaN	NaN	NaN	NaN				0	cell part;cytoplasm;cytosol;extracellular organelle;intracellular membrane-bounded organelle;intracellular non-membrane-bounded organelle;intracellular organelle;macromolecular complex;membrane;nucleus;organelle;ribonucleoprotein complex;ribosome;small ribosomal subunit;vesicle	Ribosome	2	2	2	14,9	14,9	14,9	21,879	0	86,551	32299000	6	Q5JR95;P62241	Q5JR95;P62241	40S ribosomal protein S8	RPS8
22.2920455932617	22.8110580444336	22.3451900482178	21.0782241821289	22.6124095916748	23.6963596343994	22.182409286499	22.5227699279785	23.6302318572998	21.8950805664063	22.3606491088867	21.7670078277588				0	cell part;cell projection;cytoplasmic membrane-bounded vesicle;cytosol;extracellular organelle;intracellular membrane-bounded organelle;intracellular organelle;macromolecular complex;membrane;mitochondrion;neuron projection;organelle;protein complex;vesicle	Cell cycle;Neurotrophin signaling pathway;Oocyte meiosis	7	6	6	34,9	31	31	29,174	0	46,091	74499000	31	P62258;K7EM20;B4DJF2;I3L3T1;K7EIT4;I3L0W5	P62258	14-3-3 protein epsilon	YWHAE
23.0010643005371	23.3322429656982	22.8142318725586	21.9926528930664	22.8290023803711	22.5275497436523	NaN	NaN	NaN	NaN	NaN	NaN				0	cell part;cytosol;extracellular organelle;intracellular non-membrane-bounded organelle;intracellular organelle;macromolecular complex;membrane;organelle;polysome;ribonucleoprotein complex;ribosome;small ribosomal subunit;vesicle	Ribosome	6	6	6	21,3	21,3	21,3	29,597	0	37,92	98558000	25	P62701;C9JEH7;Q8TD47;P22090	P62701	40S ribosomal protein S4, X isoform	RPS4X
23.477783203125	19.8691844940186	20.255687713623	20.4775371551514	20.8304347991943	20.3483009338379	20.3581008911133	NaN	NaN	NaN	NaN	NaN				0	cell part;cytosol;extracellular organelle;extracellular region;extracellular space;intracellular membrane-bounded organelle;intracellular organelle;membrane;nucleus;organelle;vesicle		7	7	7	46,7	46,7	46,7	18,012	0	48,712	146230000	15	P62937;F8WE65;C9J5S7;E5RIZ5;Q9Y536	P62937;F8WE65;C9J5S7	Peptidyl-prolyl cis-trans isomerase A;Peptidyl-prolyl cis-trans isomerase A, N-terminally processed;Peptidyl-prolyl cis-trans isomerase	PPIA
23.4043159484863	23.4582633972168	23.1902980804443	22.0822257995605	23.417896270752	24.6936511993408	23.3410949707031	24.1019744873047	24.659761428833	23.2198238372803	23.4223957061768	23.0275936126709				0	cell leading edge;cell part;cytoplasm;cytoplasmic membrane-bounded vesicle;cytosol;extracellular organelle;extracellular space;intracellular membrane-bounded organelle;intracellular organelle;lysosome;macromolecular complex;membrane;mitochondrion;nucleoplasm;nucleus;organelle;protein complex;vacuole;vesicle	Cell cycle;Neurotrophin signaling pathway;Oocyte meiosis	9	9	8	46,9	46,9	42,9	27,745	0	135,18	277910000	99	P63104;E7EX29;B0AZS6;B7Z2E6;H0YB80;E7ESK7;E5RGE1;E5RIR4;E9PD24;E7EVZ2;P27348;P31946;Q04917;P61981	P63104;E7EX29;B0AZS6;B7Z2E6;H0YB80	14-3-3 protein zeta/delta	YWHAZ
26.4445533752441	27.2894725799561	26.8705596923828	26.6929874420166	27.2500667572021	26.2954406738281	24.9023303985596	25.2684936523438	25.4829006195068	23.5369434356689	23.6162757873535	23.2569541931152				0	cell body;cell part;cytoplasm;cytoskeleton;cytosol;extracellular organelle;extracellular space;intracellular membrane-bounded organelle;intracellular non-membrane-bounded organelle;intracellular organelle;macromolecular complex;membrane;neuronal cell body;nucleolus;nucleus;organelle;protein complex;vesicle	RNA transport	9	9	9	26,2	26,2	26,2	50,184	0	115,51	1646100000	138	Q5VTE0;P68104;A0A087WVQ9;A0A087WV01;Q05639;A6PW80;Q5JR01	Q5VTE0;P68104;A0A087WVQ9;A0A087WV01;Q05639	Putative elongation factor 1-alpha-like 3;Elongation factor 1-alpha 1;Elongation factor 1-alpha;Elongation factor 1-alpha 2	EEF1A1P5;EEF1A1;EEF1A2
NaN	NaN	NaN	NaN	NaN	19.8004760742188	20.7322311401367	21.4750652313232	20.6997318267822	20.044734954834	20.2096729278564	20.0780925750732				0	extracellular matrix;extracellular organelle;extracellular region;organelle;proteinaceous extracellular matrix;vesicle		2	2	2	3,2	3,2	3,2	126,57	0	15,985	9386900	6	P98095	P98095	Fibulin-2	FBLN2
NaN	NaN	NaN	NaN	NaN	NaN	22.0810890197754	22.3726005554199	21.2206954956055	26.2588424682617	26.186918258667	25.3795776367188				0	cell part;extracellular matrix;extracellular organelle;extracellular region;extracellular space;membrane;organelle;plasma membrane;vesicle	ECM-receptor interaction	16	16	16	6,1	6,1	6,1	468,83	0	106,17	99287000	50	P98160;A0A0U1RQT3	P98160	Basement membrane-specific heparan sulfate proteoglycan core protein;Endorepellin;LG3 peptide	HSPG2
25.0865077972412	26.3644618988037	26.5068206787109	25.1067333221436	25.1220645904541	26.2925128936768	22.0293140411377	21.1630001068115	NaN	NaN	NaN	NaN				0	cell part;cytoplasm;cytoplasmic membrane-bounded vesicle;cytosol;extracellular organelle;extracellular space;intracellular membrane-bounded organelle;intracellular non-membrane-bounded organelle;intracellular organelle;nucleolus;nucleus;organelle;vesicle	Peroxisome	8	8	7	44,2	44,2	38,7	22,11	0	55,657	731230000	71	Q06830;A0A0A0MSI0;A0A0A0MRQ5;H7C3T4;Q13162	Q06830;A0A0A0MSI0;A0A0A0MRQ5	Peroxiredoxin-1	PRDX1
NaN	21.7431621551514	22.4173812866211	23.8230857849121	23.9858093261719	22.9361419677734	25.2796955108643	25.4246711730957	24.2897529602051	23.8961524963379	25.1626930236816	24.0274085998535				0	extracellular organelle;extracellular region;extracellular space;organelle;vesicle		4	4	4	12,7	12,7	12,7	34,985	0	50,503	185840000	27	Q12841;C9J5G4	Q12841	Follistatin-related protein 1	FSTL1
NaN	NaN	NaN	NaN	NaN	NaN	22.9641284942627	23.3784866333008	21.0659866333008	22.0489635467529	22.4165840148926	22.0213375091553				0	cell part;cell surface;extracellular matrix;extracellular organelle;extracellular region;organelle;vesicle		4	4	3	5	5	4,3	151,25	0	109,69	28886000	13	Q14112;A0A087WZP6;H0YJV3	Q14112;A0A087WZP6;H0YJV3	Nidogen-2	NID2
18.8709602355957	NaN	NaN	18.9310779571533	19.2795734405518	19.9030990600586	21.5528583526611	21.1634311676025	20.2339744567871	20.1077632904053	19.9807815551758	19.5129680633545				0	cell part;cell surface;extracellular organelle;membrane;organelle;plasma membrane;vesicle	Arrhythmogenic right ventricular cardiomyopathy (ARVC)	3	3	3	3,6	3,6	3,6	122,29	0	18,376	16474000	6	Q14126;J3KSI6	Q14126;J3KSI6	Desmoglein-2	DSG2
22.4449844360352	22.2940101623535	23.7159671783447	21.4034843444824	21.8409576416016	21.7742652893066	NaN	NaN	21.7973289489746	21.7318572998047	21.1428928375244	21.554874420166				0	cell part;cytoplasm;cytoskeleton;cytosol;intracellular non-membrane-bounded organelle;intracellular organelle;membrane;organelle;plasma membrane	Focal adhesion;MAPK signaling pathway	9	7	6	4,4	3,7	3,1	291,02	0	51,855	72351000	16	Q14315	Q14315	Filamin-C	FLNC
22.7335968017578	22.6199283599854	22.2187156677246	22.0234031677246	21.999963760376	20.935962677002	NaN	20.6304092407227	20.6154003143311	NaN	20.213830947876	19.4279384613037				0	cell part;cytoplasm;cytosol;extracellular organelle;macromolecular complex;membrane;nuclear envelope;nuclear pore;nucleoplasm;organelle;protein complex;vesicle	RNA transport	8	8	8	13,1	13,1	13,1	97,169	0	208,34	81141000	44	Q14974;J3KTM9;J3QR48;J3QRG4	Q14974;J3KTM9	Importin subunit beta-1	KPNB1
23.7565402984619	23.0953884124756	21.3438625335693	21.4368495941162	21.7539730072021	21.6905536651611	NaN	NaN	NaN	NaN	NaN	NaN				0	cell part;cytoplasm;extracellular organelle;organelle;vesicle		8	1	1	20,2	3,9	3,9	44,348	0	7,5055	108260000	25	Q58FF8	Q58FF8	Putative heat shock protein HSP 90-beta 2	HSP90AB2P
21.7342166900635	21.3348903656006	21.1923770904541	21.1636161804199	20.9309196472168	NaN	NaN	NaN	NaN	NaN	NaN	NaN				0	cell part;cytoplasm;extracellular organelle;intracellular membrane-bounded organelle;intracellular organelle;macromolecular complex;membrane;nucleoplasm;nucleus;organelle;protein complex;ubiquitin ligase complex;vesicle		7	7	7	7,8	7,8	7,8	136,37	0	43,169	37459000	15	Q86VP6;A0A0C4DGH5	Q86VP6;A0A0C4DGH5	Cullin-associated NEDD8-dissociated protein 1	CAND1
NaN	NaN	NaN	NaN	NaN	NaN	NaN	19.736515045166	19.8905220031738	NaN	NaN	22.4104118347168				0	cell part;cytosol;extracellular matrix;extracellular organelle;extracellular space;organelle;vesicle		2	2	2	4	4	4	51,286	0	14,293	5683300	4	Q92743;H0Y7G9	Q92743;H0Y7G9	Serine protease HTRA1	HTRA1
23.2878532409668	24.9085731506348	23.6761608123779	22.5962333679199	24.0342273712158	21.7540531158447	20.9727420806885	NaN	21.7468166351318	NaN	NaN	21.2890644073486				0	cell part;cytosol;intracellular non-membrane-bounded organelle;intracellular organelle;macromolecular complex;midbody;nucleolus;organelle;protein complex		8	8	8	15,3	15,3	15,3	56,084	0	57,843	161880000	27	Q9P258	Q9P258	Protein RCC2	RCC2
21.8074264526367	21.2979335784912	21.1987438201904	20.9008026123047	21.1355209350586	20.5547790527344	19.8206996917725	NaN	20.6521968841553	NaN	NaN	NaN				0	cell part;cytoplasm;extracellular organelle;intracellular membrane-bounded organelle;intracellular non-membrane-bounded organelle;intracellular organelle;macromolecular complex;membrane;nucleolus;nucleoplasm;nucleus;organelle;ribonucleoprotein complex;vesicle		2	2	2	6,1	6,1	6,1	43,786	0	14,511	33171000	6	Q9UQ80;F8VR77	Q9UQ80;F8VR77	Proliferation-associated protein 2G4	PA2G4
24.3947334289551	25.5089378356934	24.9140148162842	23.3054943084717	23.7297229766846	23.1676940917969	20.7471446990967	21.0955181121826	20.9064655303955	NaN	NaN	NaN				0	cell part;cytoplasm;cytosol;extracellular organelle;organelle;vesicle	Glycine, serine and threonine metabolism;Methane metabolism;Vitamin B6 metabolism	8	8	8	21,9	21,9	21,9	40,422	0	134,86	225990000	53	Q9Y617	Q9Y617	Phosphoserine aminotransferase	PSAT1

## Sheet: Planilha5
CMd1_1	CMd1_2	CMd1_3	CMd4_1	CMd4_2	CMd4_3	CMd8_1	CMd8_2	CMd8_3	CMd15_1	CMd15_2	CMd15_3	Only identified by site	Reverse	Potential contaminant	nCM	GOCC slim name	KEGG name	Peptides	Razor + unique peptides	Unique peptides	Sequence coverage [%]	Unique + razor sequence coverage [%]	Unique sequence coverage [%]	Mol. weight [kDa]	Q-value	Score	Intensity	MS/MS count	Protein IDs	Majority protein IDs	Protein names	Gene names
#!{Type}E	E	E	E	E	E	E	E	E	E	E	E	C	C	C	C	C	C	N	N	N	N	N	N	N	N	N	N	N	T	T	T	T
#!{C:CM/day}CMd1	CMd1	CMd1	CMd4	CMd4	CMd4	CMd8	CMd8	CMd8	CMd15	CMd15	CMd15
24.4512367248535	23.1559944152832	22.6221199035645	21.0363750457764	21.7849655151367	21.0020275115967	20.653247833252	19.7518901824951	20.1698665618896	NaN	20.2624702453613	19.7154197692871				0	cell part;cytoplasm;cytoplasmic membrane-bounded vesicle;cytosol;extracellular organelle;intracellular membrane-bounded organelle;intracellular non-membrane-bounded organelle;intracellular organelle;macromolecular complex;membrane;mitochondrion;organelle;plasma membrane;protein complex;vesicle	Bacterial invasion of epithelial cells;Endocrine and other factor-regulated calcium reabsorption;Endocytosis;Huntington's disease;Lysosome	14	14	14	11,9	11,9	11,9	192,06	0	129,63	129410000	33	A0A087WVQ6;Q00610;J3KS13;A0A087WX41;P53675;J3KRF5;K7EJJ5;J3KSQ2;F5H5N6	A0A087WVQ6;Q00610	Clathrin heavy chain;Clathrin heavy chain 1	CLTC
22.4157848358154	25.5781631469727	22.5140514373779	22.2501163482666	22.6505336761475	22.3418273925781	NaN	NaN	NaN	NaN	NaN	NaN				0	cell part;cytosol;extracellular organelle;intracellular membrane-bounded organelle;intracellular organelle;nucleus;organelle;vesicle	Amino sugar and nucleotide sugar metabolism;Galactose metabolism;Pentose and glucuronate interconversions;Starch and sucrose metabolism	6	6	6	16,7	16,7	16,7	56,967	0	46,327	87911000	16	A0A087WYS1;E7EUC7;Q16851;C9JVG3;C9JQU9;C9JNZ1;C9JWG0;C9JTZ5;C9JUW1	A0A087WYS1;E7EUC7;Q16851;C9JVG3;C9JQU9;C9JNZ1	UTP--glucose-1-phosphate uridylyltransferase	UGP2
21.6070232391357	22.5935688018799	NaN	NaN	NaN	21.8502597808838	NaN	NaN	NaN	NaN	NaN	NaN				0	cell part;cytoplasm;cytosol;extracellular organelle;intracellular membrane-bounded organelle;intracellular organelle;macromolecular complex;nucleoplasm;nucleus;organelle;proteasome complex;protein complex;vesicle	Proteasome	2	2	2	11,2	11,2	11,2	25,041	0	12,976	50499000	3	A0A087WYS6;O14818;Q8TAA3;H0Y586	A0A087WYS6;O14818;Q8TAA3;H0Y586	Proteasome subunit alpha type-7;Proteasome subunit alpha type-7-like	PSMA8;PSMA7
NaN	22.74831199646	22.1645660400391	25.7771587371826	24.6907253265381	24.1656875610352	26.2883281707764	26.1726837158203	25.5389575958252	25.0883293151855	25.3946018218994	24.9652118682861				0	cell part;extracellular matrix;extracellular organelle;extracellular region;macromolecular complex;membrane;organelle;plasma membrane;protein complex;vesicle	ECM-receptor interaction;Focal adhesion;Protein digestion and absorption	10	10	10	13,4	13,4	13,4	108,34	0	96,348	383530000	59	A0A087X0S5;P12109	A0A087X0S5;P12109	Collagen alpha-1(VI) chain	COL6A1
22.2425479888916	22.1990451812744	23.4226512908936	21.6263599395752	22.4471797943115	22.8093318939209	21.0834922790527	21.5369205474854	21.9691619873047	20.6942157745361	21.2779293060303	21.0937786102295				0	cell part;cytoplasm;cytosol;extracellular organelle;intracellular membrane-bounded organelle;intracellular organelle;macromolecular complex;membrane;nucleus;organelle;plasma membrane;preribosome;ribonucleoprotein complex;small ribosomal subunit;vesicle	Ribosome	5	5	5	26,2	26,2	26,2	29,404	0	33,775	96314000	17	C9J9K3;A0A0C4DG17;P08865;F8WD59	C9J9K3;A0A0C4DG17;P08865;F8WD59	40S ribosomal protein SA	RPSA
NaN	NaN	NaN	NaN	NaN	22.4644088745117	22.3613185882568	22.5681114196777	NaN	NaN	NaN	NaN				0	cell part;extracellular organelle;extracellular region;extracellular space;membrane;organelle;plasma membrane;vesicle	Complement and coagulation cascades;Staphylococcus aureus infection	2	2	2	4,6	4,6	4,6	65,769	0	13,622	35676000	6	A0A0G2JH38;E7ETN3;B4E1Z4;P00751;H7C5H1	A0A0G2JH38;E7ETN3;B4E1Z4;P00751;H7C5H1	Complement factor B;Complement factor B Ba fragment;Complement factor B Bb fragment	CFB
22.6383209228516	21.8470134735107	23.928861618042	21.2775897979736	22.2624702453613	20.7399940490723	20.0247230529785	19.5633525848389	20.4430370330811	19.5680751800537	19.7183990478516	NaN				0	cell part;cytoplasm;cytoplasmic membrane-bounded vesicle;cytosol;extracellular organelle;Golgi apparatus;intracellular membrane-bounded organelle;intracellular organelle;membrane;mitochondrion;organelle;plasma membrane;vesicle	Fatty acid biosynthesis;Insulin signaling pathway	8	8	8	5	5	5	273,2	0	54,745	94344000	28	A0A0U1RQF0;P49327	A0A0U1RQF0;P49327	Fatty acid synthase;[Acyl-carrier-protein] S-acetyltransferase;[Acyl-carrier-protein] S-malonyltransferase;3-oxoacyl-[acyl-carrier-protein] synthase;3-oxoacyl-[acyl-carrier-protein] reductase;3-hydroxyacyl-[acyl-carrier-protein] dehydratase;Enoyl-[acyl-carrier-protein] reductase;Oleoyl-[acyl-carrier-protein] hydrolase	FASN
22.3265209197998	25.3211345672607	25.4643211364746	25.3443508148193	22.4048099517822	21.3647956848145	22.3264122009277	21.6799430847168	21.464183807373	22.1080837249756	22.1499462127686	21.9622936248779				0	cell part;chromosome;extracellular organelle;intracellular membrane-bounded organelle;intracellular non-membrane-bounded organelle;intracellular organelle;macromolecular complex;nuclear chromosome;nucleoplasm;nucleosome;nucleus;organelle;vesicle	Systemic lupus erythematosus	3	3	3	20,7	20,7	20,7	18,481	0	24,299	184080000	29	A0A0U1RR32;A0A0U1RRH7;Q99878;Q96KK5;Q9BTM1;Q16777;Q93077;Q7L7L0;Q6FI13;P20671;P0C0S8;P04908;H0YFX9;C9J0D1;Q71UI9;P0C0S5;Q96QV6;P16104;C9J386;Q8IUE6	A0A0U1RR32;A0A0U1RRH7;Q99878;Q96KK5;Q9BTM1;Q16777;Q93077;Q7L7L0;Q6FI13;P20671;P0C0S8;P04908;H0YFX9;C9J0D1;Q71UI9;P0C0S5;Q96QV6;P16104	Histone H2A type 1-J;Histone H2A type 1-H;Histone H2A.J;Histone H2A type 2-C;Histone H2A type 1-C;Histone H2A type 3;Histone H2A type 2-A;Histone H2A type 1-D;Histone H2A type 1;Histone H2A type 1-B/E;Histone H2A;Histone H2A.V;Histone H2A.Z;Histone H2A type 1-A;Histone H2AX	HIST1H2AJ;HIST1H2AH;H2AFJ;HIST2H2AC;HIST1H2AC;HIST3H2A;HIST2H2AA3;HIST1H2AD;HIST1H2AG;HIST1H2AB;H2AFV;H2AFZ;HIST1H2AA;H2AFX
21.0953254699707	20.5459480285645	NaN	20.5561847686768	20.6427116394043	21.9244823455811	NaN	NaN	NaN	NaN	20.3451633453369	NaN				0	cell part;cell projection;cilium;cytoplasm;cytosol;extracellular matrix;extracellular organelle;intracellular membrane-bounded organelle;intracellular organelle;membrane;mitochondrion;nucleus;organelle;plasma membrane;vesicle	Carbon fixation in photosynthetic organisms;Glycolysis / Gluconeogenesis;Purine metabolism;Pyruvate metabolism;Type II diabetes mellitus	5	5	5	15,1	15,1	15,1	49,897	0	32,906	32296000	6	B4DNK4;P14618;H3BTN5;H3BQ34;H3BR70	B4DNK4;P14618;H3BTN5;H3BQ34;H3BR70	Pyruvate kinase;Pyruvate kinase PKM	PKM
23.8990135192871	25.3178272247314	24.988151550293	22.4267520904541	21.7506637573242	22.5556926727295	21.4041080474854	21.661491394043	21.7457084655762	20.3425617218018	NaN	20.3462448120117				0	cell part;cytoplasm;cytoplasmic membrane-bounded vesicle;cytosol;endosome;extracellular organelle;intracellular;intracellular membrane-bounded organelle;intracellular non-membrane-bounded organelle;intracellular organelle;macromolecular complex;membrane;midbody;nuclear pore;nucleocytoplasmic shuttling complex;nucleolus;nucleoplasm;nucleus;organelle;protein complex;vesicle	Ribosome biogenesis in eukaryotes;RNA transport	5	5	5	33,3	33,3	33,3	22,436	0	89,257	193470000	22	F5H018;B5MDF5;J3KQE5;P62826;B4DV51;H0YFC6	F5H018;B5MDF5;J3KQE5;P62826;B4DV51	GTP-binding nuclear protein Ran	RAN
23.7226524353027	23.4974098205566	23.8152866363525	22.8873271942139	23.7383041381836	22.3078308105469	21.9575901031494	21.9351348876953	23.5374183654785	21.6681308746338	22.6085357666016	21.6676540374756				0	cell part;cytosol;extracellular organelle;intracellular membrane-bounded organelle;intracellular organelle;macromolecular complex;nucleoplasm;nucleus;organelle;ribonucleoprotein complex;vesicle		4	4	4	22,6	22,6	22,6	23,076	0	69,195	177530000	46	D6RAF8;Q14103;D6RF44;H0YA96;H0Y8G5;D6RD83;D6RBQ9;A0A087WUK2;O14979	D6RAF8;Q14103;D6RF44;H0YA96;H0Y8G5;D6RD83;D6RBQ9	Heterogeneous nuclear ribonucleoprotein D0	HNRNPD
20.6269397735596	20.3524017333984	NaN	21.3958187103271	NaN	23.3447570800781	20.6407718658447	20.9880828857422	NaN	NaN	NaN	NaN				0	cell part;cytoplasm;cytosol;extracellular organelle;organelle;vesicle	Nitrogen metabolism	2	2	2	24,1	24,1	24,1	9,4069	0	15,713	52342000	30	E5RJF6;E5RJI8;E5RH81;H0YBE2;E5RFE7;E5RHP7;P00915;E5RG81	E5RJF6;E5RJI8;E5RH81;H0YBE2;E5RFE7;E5RHP7;P00915;E5RG81	Carbonic anhydrase 1	CA1
23.3106346130371	21.9406299591064	22.1046962738037	22.3344268798828	22.3729724884033	23.6934928894043	20.2810478210449	20.1526412963867	NaN	19.3547916412354	19.6489200592041	19.6587657928467				0	apical part of cell;brush border;cell body;cell part;cell projection;cytoplasm;cytoskeleton;cytosol;extracellular organelle;extracellular space;filopodium;intracellular membrane-bounded organelle;intracellular non-membrane-bounded organelle;intracellular organelle;macromolecular complex;membrane;microvillus;nucleolus;nucleus;organelle;plasma membrane;protein complex;vesicle	Gastric acid secretion;Leukocyte transendothelial migration;Measles;Pathogenic Escherichia coli infection;Regulation of actin cytoskeleton	6	6	6	9,7	9,7	9,7	69,371	0	52,143	96286000	21	E7EQR4;P15311;P26038;P35241;V9GZ54;E9PQ82;E9PNV3	E7EQR4;P15311;P26038;P35241	Ezrin;Moesin;Radixin	EZR;MSN;RDX
22.6736602783203	22.8990325927734	22.6955108642578	22.0074100494385	22.501594543457	NaN	NaN	NaN	NaN	NaN	NaN	NaN				0	cell part;cytoplasm;cytosol;extracellular organelle;intracellular membrane-bounded organelle;intracellular non-membrane-bounded organelle;intracellular organelle;macromolecular complex;membrane;nucleolus;nucleus;organelle;ribonucleoprotein complex;ribosome;small ribosomal subunit;vesicle	Ribosome	4	4	4	21,6	21,6	21,6	25,371	0	26,535	61611000	11	E9PL09;P23396;E9PPU1;H0YEU2;F2Z2S8;H0YF32;H0YCJ7;E9PQ96;E9PSF4;E9PJH4;E9PK82	E9PL09;P23396;E9PPU1;H0YEU2;F2Z2S8;H0YF32;H0YCJ7	40S ribosomal protein S3	RPS3
22.9498825073242	22.4471035003662	22.9205074310303	22.5093002319336	22.9829235076904	22.4959716796875	22.2933654785156	NaN	NaN	21.9379386901855	22.2829151153564	21.9271621704102				0	cell part;cytosol;extracellular organelle;intracellular membrane-bounded organelle;intracellular organelle;nucleus;organelle;vesicle		4	4	4	5,1	5,1	5,1	102,99	0	24,108	115490000	8	E9PLK3;P55786;A6NEC2;H0YCQ5;E9PJ74;H0YDG0;E9PRQ5	E9PLK3;P55786;A6NEC2	Puromycin-sensitive aminopeptidase;Puromycin-sensitive aminopeptidase-like protein	NPEPPS;NPEPPSL1
21.5523433685303	21.5831604003906	21.4406051635742	23.2987995147705	23.645263671875	22.7791042327881	25.6943168640137	26.0580863952637	25.4770736694336	22.5484428405762	23.2183322906494	22.8948574066162				0	cell part;cell surface;cytoplasm;cytoplasmic membrane-bounded vesicle;extracellular matrix;extracellular region;extracellular space;intracellular membrane-bounded organelle;intracellular organelle;membrane;organelle;proteinaceous extracellular matrix;vesicle		5	5	5	28,9	28,9	28,9	17,47	0	68,465	217630000	30	F5GY03;P09486;E5RK62	F5GY03;P09486;E5RK62	SPARC	SPARC
18.4894237518311	17.7941112518311	18.3810195922852	17.8900032043457	17.7757778167725	NaN	NaN	NaN	NaN	NaN	NaN	NaN				0	cell part;cell surface;cytoplasm;cytoplasmic membrane-bounded vesicle;extracellular organelle;intracellular membrane-bounded organelle;intracellular organelle;membrane;nucleoplasm;nucleus;organelle;plasma membrane;vesicle	Protein digestion and absorption	2	2	2	4,3	4,3	4,3	64,872	0	12,26	7355900	2	F5GZS6;J3KPF3;P08195;H0YFX4;F5GZI0	F5GZS6;J3KPF3;P08195;H0YFX4;F5GZI0	4F2 cell-surface antigen heavy chain	SLC3A2
NaN	22.2242622375488	21.9863128662109	NaN	NaN	NaN	NaN	NaN	NaN	NaN	NaN	NaN				0	cell part;cytosol;extracellular organelle;intracellular membrane-bounded organelle;intracellular organelle;membrane;mitochondrion;organelle;vesicle	One carbon pool by folate	4	4	4	4,5	4,5	4,5	110,61	0	32,389	20389000	5	F5H2F4;P11586;V9GYY3	F5H2F4;P11586	C-1-tetrahydrofolate synthase, cytoplasmic;Methylenetetrahydrofolate dehydrogenase;Methenyltetrahydrofolate cyclohydrolase;Formyltetrahydrofolate synthetase;C-1-tetrahydrofolate synthase, cytoplasmic, N-terminally processed	MTHFD1
23.933910369873	23.2616958618164	21.7758731842041	22.4675712585449	22.4394130706787	24.7491397857666	20.7521362304688	21.2374229431152	21.0016136169434	20.9728107452393	NaN	20.1879749298096				0	cell part;cytoplasm;cytosol;endosome;extracellular organelle;extracellular region;intracellular membrane-bounded organelle;intracellular organelle;macromolecular complex;nucleus;organelle;protein complex;vesicle	Gap junction;Pathogenic Escherichia coli infection;Phagosome	10	10	5	24,3	24,3	13,5	57,73	0	75,236	245730000	43	F5H5D3;Q9BQE3;Q71U36;P68363;A0A1W2PQM2;Q13748;Q6PEY2;F8VVB9;C9J2C0;P68366;V9GZ17;F8VRZ4;F8VS66;F8VQQ4;F8VRK0;F8VX09;F8VWV9;C9JDS9;A6NHL2;F8VXZ7;F8W0F6;Q9H853	F5H5D3;Q9BQE3;Q71U36;P68363;A0A1W2PQM2;Q13748;Q6PEY2;F8VVB9;C9J2C0;P68366	Tubulin alpha-1C chain;Tubulin alpha-1A chain;Tubulin alpha-1B chain;Tubulin alpha-3C/D chain;Tubulin alpha-3E chain;Tubulin alpha-4A chain	TUBA1C;TUBA1A;TUBA1B;TUBA3C;TUBA3E;TUBA8;TUBA4A
23.6727123260498	23.5723056793213	22.2982959747314	21.1749324798584	22.0246887207031	21.898551940918	21.0851154327393	20.810567855835	21.0911979675293	NaN	20.5108451843262	NaN				0	cell part;cytoplasm;cytoskeleton;extracellular organelle;intracellular non-membrane-bounded organelle;intracellular organelle;macromolecular complex;membrane;nucleoplasm;organelle;ribonucleoprotein complex;spliceosomal complex;vesicle	Spliceosome	5	5	5	42,1	42,1	42,1	16,536	0	32,315	153690000	19	F8VTQ5;F8W6I7;P09651;F8VZ49;Q32P51;F8VYN5;F8W646;H0YH80	F8VTQ5;F8W6I7;P09651;F8VZ49;Q32P51	Heterogeneous nuclear ribonucleoprotein A1;Heterogeneous nuclear ribonucleoprotein A1, N-terminally processed;Heterogeneous nuclear ribonucleoprotein A1-like 2	HNRNPA1;HNRNPA1L2
21.0460681915283	21.6786975860596	21.4005680084229	NaN	21.2321014404297	22.2063674926758	20.8818874359131	20.9479942321777	20.8971862792969	20.4849281311035	NaN	NaN				0	cell part;cytoplasm;cytosol;extracellular organelle;intracellular membrane-bounded organelle;intracellular non-membrane-bounded organelle;intracellular organelle;macromolecular complex;membrane;nucleus;organelle;ribonucleoprotein complex;ribosome;vesicle	Ribosome	4	4	4	17,8	17,8	17,8	27,187	0	28,001	49120000	13	F8VU65;P05388;F8VPE8;G3V210;F8VW21;F8VWS0;Q8NHW5;F8VS58;F8VQY6;F8VRK7;F8VZS0;F8VWV4	F8VU65;P05388;F8VPE8;G3V210;F8VW21;F8VWS0;Q8NHW5;F8VS58;F8VQY6;F8VRK7;F8VZS0	60S acidic ribosomal protein P0;60S acidic ribosomal protein P0-like	RPLP0;RPLP0P6
NaN	22.2937297821045	23.3181037902832	22.6728420257568	23.5577735900879	21.783088684082	NaN	NaN	NaN	NaN	NaN	NaN				0	cell body;cell part;cell projection;cytoplasm;cytoskeleton;cytosol;extracellular organelle;intracellular membrane-bounded organelle;intracellular non-membrane-bounded organelle;intracellular organelle;macromolecular complex;midbody;mitochondrion;neuron projection;neuronal cell body;nucleus;organelle;ribonucleoprotein complex;small ribosomal subunit;vesicle	Measles	3	3	3	19,7	19,7	19,7	21,934	0	22,513	55952000	10	H0YAF8;J3KPE3;H0Y8W2;P63244;D6RAU2;E9PD14;D6RFX4;D6RFZ9;D6RHH4;D6R9Z1;H0YAM7;D6R9L0;H0Y9P0;D6RF23;D6RAC2;D6REE5	H0YAF8;J3KPE3;H0Y8W2;P63244;D6RAU2;E9PD14;D6RFX4;D6RFZ9;D6RHH4;D6R9Z1;H0YAM7;D6R9L0	Guanine nucleotide-binding protein subunit beta-2-like 1;Guanine nucleotide-binding protein subunit beta-2-like 1, N-terminally processed	GNB2L1
NaN	20.9587230682373	20.9841232299805	21.4618396759033	21.6475944519043	20.9106426239014	21.733678817749	21.7779216766357	NaN	NaN	NaN	NaN				0	cell part;cytoplasm;cytoplasmic membrane-bounded vesicle;cytosol;endoplasmic reticulum;extracellular matrix;extracellular organelle;extracellular region;extracellular space;Golgi apparatus;intracellular membrane-bounded organelle;intracellular organelle;macromolecular complex;membrane;mitochondrion;nucleus;organelle;vesicle		2	2	2	12,3	12,3	12,3	33,419	0	13,353	29324000	15	H0YC35;P10909;H0YAS8;E7ERK6;H0YLK8	H0YC35;P10909;H0YAS8;E7ERK6;H0YLK8	Clusterin;Clusterin;Clusterin beta chain;Clusterin alpha chain	CLU
NaN	19.4018707275391	NaN	19.5284843444824	NaN	20.2389965057373	NaN	NaN	19.487756729126	NaN	NaN	NaN				0	cell part;cell surface;extracellular organelle;intracellular membrane-bounded organelle;intracellular non-membrane-bounded organelle;intracellular organelle;macromolecular complex;membrane;mitochondrion;nucleus;organelle;plasma membrane;protein complex;proton-transporting two-sector ATPase complex;vesicle	Alzheimer's disease;Huntington's disease;Oxidative phosphorylation;Parkinson's disease	4	4	4	15,2	15,2	15,2	38,138	0	23,511	21381000	4	H0YH81;P06576;F8W079;F8W0P7;H0YI37	H0YH81;P06576;F8W079;F8W0P7	ATP synthase subunit beta;ATP synthase subunit beta, mitochondrial	ATP5B
NaN	NaN	NaN	NaN	NaN	NaN	21.3596038818359	21.4898357391357	21.2917079925537	23.7027149200439	22.4654064178467	23.4122219085693				0	cell part;extracellular matrix;extracellular organelle;extracellular region;extracellular space;organelle;vesicle	Protein digestion and absorption	2	2	2	6,4	6,4	6,4	70,733	0	15,763	20049000	11	H7BXV5;P39060;H7C457	H7BXV5;P39060;H7C457	Collagen alpha-1(XVIII) chain;Endostatin	COL18A1
19.4463729858398	19.9674739837646	20.3298091888428	21.4879245758057	21.3271789550781	NaN	23.0766429901123	23.1199703216553	21.4045238494873	20.898811340332	NaN	20.5207576751709				0	cell part;endoplasmic reticulum;extracellular matrix;extracellular organelle;extracellular space;intracellular membrane-bounded organelle;intracellular organelle;organelle;proteinaceous extracellular matrix;vesicle		2	2	2	2,8	2,8	2,8	79,755	0	17,144	34944000	20	H7C1W1;Q92626	H7C1W1;Q92626	Peroxidasin homolog	PXDN
NaN	NaN	NaN	NaN	NaN	NaN	NaN	NaN	NaN	NaN	21.8398818969727	23.2042942047119				0	cell part;cytoplasm;extracellular space		5	2	2	8,7	3,2	3,2	70,449	0	12,638	9206100	6	J3KMX3;P02771	J3KMX3;P02771	Alpha-fetoprotein	AFP
26.2152500152588	26.6738433837891	26.1627902984619	24.9070148468018	26.7283229827881	26.139949798584	23.7486801147461	24.1221046447754	24.8296794891357	24.1679077148438	24.7196273803711	24.5636615753174				0	cell part;cytoskeleton;cytosol;extracellular organelle;extracellular region;extracellular space;intracellular membrane-bounded organelle;intracellular non-membrane-bounded organelle;intracellular organelle;membrane;nucleus;organelle;vesicle	Carbon fixation in photosynthetic organisms;Fructose and mannose metabolism;Glycolysis / Gluconeogenesis;Pentose phosphate pathway	14	14	13	45,7	45,7	43,8	39,817	0	121,45	942230000	86	J3KPS3;P04075;H3BQN4;H3BPS8;H3BUH7;H3BR04;H3BMQ8;H3BU78;H3BR68;A0A087WXX2;P05062	J3KPS3;P04075;H3BQN4;H3BPS8;H3BUH7;H3BR04;H3BMQ8	Fructose-bisphosphate aldolase;Fructose-bisphosphate aldolase A	ALDOA
21.8947105407715	23.1332015991211	22.5978260040283	22.0871562957764	23.8042011260986	22.2252635955811	NaN	21.4380683898926	21.5724201202393	NaN	NaN	21.1486759185791				0	cell part;cytosol;extracellular organelle;intracellular membrane-bounded organelle;intracellular organelle;nucleus;organelle;vesicle	Glutathione metabolism;Pentose phosphate pathway	4	4	4	36,2	36,2	36,2	17,293	0	33,151	64578000	10	K7EMN2;K7EM49;P52209;K7EPF6	K7EMN2;K7EM49;P52209;K7EPF6	6-phosphogluconate dehydrogenase, decarboxylating	PGD
19.7897891998291	19.5907440185547	19.5190486907959	NaN	NaN	NaN	NaN	NaN	NaN	NaN	NaN	NaN				0	cell part;cytosol;extracellular organelle;intracellular non-membrane-bounded organelle;intracellular organelle;macromolecular complex;membrane;organelle;ribonucleoprotein complex;ribosome;small ribosomal subunit;vesicle	Ribosome	2	2	2	34	34	34	5,5575	0	12,06	16563000	8	M0QX76;M0R1M5;M0R3H0;M0R210;Q6IPX4;P62249	M0QX76;M0R1M5;M0R3H0;M0R210;Q6IPX4;P62249	40S ribosomal protein S16	RPS16
NaN	19.8008403778076	21.4410610198975	26.0760631561279	26.3211688995361	26.6588077545166	24.0576324462891	23.9868507385254	23.3924427032471	NaN	NaN	NaN				0	cell part;extracellular matrix;extracellular region;extracellular space	TGF-beta signaling pathway	8	8	8	29,2	29,2	29,2	40,92	0	62,709	278350000	50	O00292;O75610;A0A087WW09	O00292;O75610	Left-right determination factor 2;Left-right determination factor 1	LEFTY2;LEFTY1
23.7086200714111	24.2717037200928	24.4510478973389	23.1848468780518	23.9320201873779	23.8396129608154	21.5154724121094	21.7584533691406	21.936429977417	20.6947250366211	21.3984832763672	21.1120986938477				0	cell part;cell projection;cytoplasm;cytoskeleton;extracellular organelle;extracellular region;extracellular space;intracellular membrane-bounded organelle;intracellular non-membrane-bounded organelle;intracellular organelle;macromolecular complex;neuron projection;nucleus;organelle;protein complex;pseudopodium;ribonucleoprotein complex;vesicle	Adherens junction;Amoebiasis;Arrhythmogenic right ventricular cardiomyopathy (ARVC);Focal adhesion;Leukocyte transendothelial migration;Regulation of actin cytoskeleton;Systemic lupus erythematosus;Tight junction	8	8	3	11,7	11,7	5,4	104,85	0	103,19	211760000	46	O43707;H7C144;F5GXS2	O43707;H7C144;F5GXS2	Alpha-actinin-4	ACTN4
NaN	24.1106014251709	24.0065021514893	25.5975303649902	23.052417755127	NaN	22.3932018280029	22.5547332763672	NaN	NaN	22.1804981231689	NaN				0	cell part;extracellular organelle;extracellular space;intracellular membrane-bounded organelle;intracellular organelle;macromolecular complex;nucleoplasm;nucleosome;nucleus;organelle;vesicle	Systemic lupus erythematosus	2	2	2	15,1	15,1	15,1	18,804	0	106,27	102590000	25	U3KQK0;Q99880;Q99879;Q99877;Q93079;Q5QNW6;P62807;P58876;P57053;O60814;Q8N257;Q16778;P33778;P23527;P06899	U3KQK0;Q99880;Q99879;Q99877;Q93079;Q5QNW6;P62807;P58876;P57053;O60814;Q8N257;Q16778;P33778;P23527;P06899	Histone H2B;Histone H2B type 1-L;Histone H2B type 1-M;Histone H2B type 1-N;Histone H2B type 1-H;Histone H2B type 2-F;Histone H2B type 1-C/E/F/G/I;Histone H2B type 1-D;Histone H2B type F-S;Histone H2B type 1-K;Histone H2B type 3-B;Histone H2B type 2-E;Histone H2B type 1-B;Histone H2B type 1-O;Histone H2B type 1-J	HIST1H2BN;HIST1H2BL;HIST1H2BM;HIST1H2BH;HIST2H2BF;HIST1H2BC;HIST1H2BD;H2BFS;HIST1H2BK;HIST3H2BB;HIST2H2BE;HIST1H2BB;HIST1H2BO;HIST1H2BJ
24.9750442504883	25.8465404510498	25.9392127990723	23.8303565979004	25.3946342468262	24.7002296447754	22.3879814147949	22.3933067321777	24.3467864990234	22.0043258666992	22.478796005249	21.875602722168				0	cell part;cytoplasm;cytosol;extracellular organelle;intracellular membrane-bounded organelle;intracellular organelle;microbody;mitochondrion;organelle;peroxisome;vesicle	Carbon fixation pathways in prokaryotes;Citrate cycle (TCA cycle);Glutathione metabolism;Peroxisome	8	8	8	22,9	22,9	22,9	46,659	0	67,296	354860000	48	O75874;C9J4N6;C9JJE5;C9JLU6;P48735	O75874;C9J4N6	Isocitrate dehydrogenase [NADP] cytoplasmic	IDH1
NaN	NaN	21.105655670166	22.3856391906738	22.1684894561768	21.5103626251221	23.1634006500244	23.4854202270508	21.9786529541016	21.9930686950684	22.0879001617432	22.0652961730957				0	cell part;cell projection;extracellular organelle;intracellular membrane-bounded organelle;intracellular organelle;membrane;nucleus;organelle;vesicle		4	4	4	6,3	6,3	6,3	88,039	0	30,086	54120000	15	Q5SR54;O94985	Q5SR54;O94985	Calsyntenin-1;Soluble Alc-alpha;CTF1-alpha	CLSTN1
NaN	23.4791412353516	23.4975318908691	24.2915115356445	24.3933582305908	27.7163333892822	22.1001472473145	NaN	22.9986057281494	NaN	NaN	NaN				0	extracellular region;extracellular space	Wnt signaling pathway	6	6	6	42,3	42,3	42,3	30,083	0	50,1	297050000	21	O95813	O95813	Cerberus	CER1
25.6595153808594	25.7622299194336	25.7446308135986	25.5417366027832	26.260009765625	25.8483085632324	24.479944229126	24.4889793395996	25.8478546142578	25.0528736114502	25.0047035217285	24.3332672119141				0	cell part;cytosol;extracellular organelle;intracellular membrane-bounded organelle;intracellular organelle;membrane;mitochondrion;nucleus;organelle;vesicle	Cysteine and methionine metabolism;Glycolysis / Gluconeogenesis;Propanoate metabolism;Pyruvate metabolism	10	9	9	31,3	27,7	27,7	36,688	0	97,094	674670000	90	P00338;F5GYU2;F5GXY2;F5GXH2;F5H5J4;F5H6W8;F5GZQ4;F5H8H6;F5GXC7;F5GWW2;F5GXU1	P00338;F5GYU2;F5GXY2;F5GXH2	L-lactate dehydrogenase A chain	LDHA
NaN	NaN	NaN	NaN	NaN	NaN	24.5768089294434	24.5733451843262	23.2166004180908	23.730447769165	23.3214111328125	23.4230365753174				0	cell part;extracellular matrix;extracellular region;extracellular space	Amoebiasis;ECM-receptor interaction;Focal adhesion;Protein digestion and absorption	3	3	3	2,6	2,6	2,6	141,78	0	28,154	81051000	8	P02458	P02458	Collagen alpha-1(II) chain;Collagen alpha-1(II) chain;Chondrocalcin	COL2A1
23.2967014312744	24.6783103942871	24.1540641784668	26.9689502716064	26.7992172241211	26.0243053436279	27.8479251861572	27.6634979248047	28.0119590759277	27.0752067565918	26.5683670043945	26.8034114837646				0	cell body;cell part;cell projection;cytoplasm;endoplasmic reticulum;endosome;extracellular matrix;extracellular organelle;extracellular region;extracellular space;Golgi apparatus;intracellular membrane-bounded organelle;intracellular organelle;lysosome;macromolecular complex;membrane;neuron projection;neuronal cell body;nuclear envelope;nucleus;organelle;plasma membrane;protein complex;vacuole;ve…	Alzheimer's disease	14	14	14	49,2	49,2	49,2	36,154	0	323,31	1432800000	212	P02649;H0Y7L5;E9PEV4;E7ERP7;CON__Q03247	P02649;H0Y7L5	Apolipoprotein E	APOE
25.0991268157959	26.3637771606445	25.3623561859131	29.2285079956055	29.0598468780518	27.5175075531006	30.1302585601807	30.0432262420654	30.0867671966553	30.004638671875	29.3553771972656	29.5929718017578				0	cell part;extracellular matrix;extracellular organelle;extracellular region;extracellular space;intracellular membrane-bounded organelle;intracellular organelle;macromolecular complex;organelle;protein complex;vesicle	Amoebiasis;Bacterial invasion of epithelial cells;ECM-receptor interaction;Focal adhesion;Pathways in cancer;Regulation of actin cytoskeleton;Small cell lung cancer	50	50	50	33,9	33,9	33,9	262,62	0	323,31	6285800000	759	P02751;H0Y7Z1;H0Y4K8	P02751;H0Y7Z1	Fibronectin;Anastellin;Ugl-Y1;Ugl-Y2;Ugl-Y3	FN1
NaN	22.3422889709473	21.4548797607422	NaN	NaN	NaN	19.5241279602051	20.0758762359619	NaN	21.1625099182129	21.2889518737793	23.7106189727783				0	cell body;cell part;cytoplasm;cytoskeleton;cytosol;endosome;extracellular organelle;extracellular region;extracellular space;Golgi apparatus;intracellular membrane-bounded organelle;intracellular non-membrane-bounded organelle;intracellular organelle;macromolecular complex;membrane;neuronal cell body;organelle;plasma membrane;vesicle	Fat digestion and absorption;Vitamin digestion and absorption	10	10	8	2,7	2,7	2,1	515,6	0	62,813	20093000	23	P04114;A8MUN2	P04114	Apolipoprotein B-100;Apolipoprotein B-48	APOB
NaN	20.8567333221436	NaN	21.1435775756836	20.8409957885742	20.9399127960205	24.2690658569336	20.9939670562744	NaN	NaN	NaN	NaN				0	cell part;cytoskeleton;cytosol;extracellular organelle;extracellular region;extracellular space;intracellular membrane-bounded organelle;intracellular non-membrane-bounded organelle;intracellular organelle;membrane;nucleus;organelle;plasma membrane;vesicle		6	6	6	52,7	52,7	52,7	10,834	0	40,855	525890000	15	P05109	P05109	Protein S100-A8;Protein S100-A8, N-terminally processed	S100A8
NaN	25.0441017150879	25.6408309936523	24.5048828125	23.8947658538818	NaN	NaN	NaN	NaN	NaN	NaN	NaN				0	cell part;cytoplasm;cytosol;extracellular organelle;extracellular space;organelle;vesicle	PPAR signaling pathway	2	2	2	15,7	15,7	15,7	10,17	0	45,147	101860000	12	S4R3A2;S4R371;P05413	S4R3A2;S4R371;P05413	Fatty acid-binding protein, heart	FABP3
NaN	NaN	NaN	NaN	NaN	NaN	20.7154026031494	20.8962993621826	NaN	22.0767574310303	21.6039943695068	24.6034278869629				0	cell part;cytosol;endosome;extracellular organelle;extracellular region;extracellular space;intracellular membrane-bounded organelle;intracellular organelle;macromolecular complex;organelle;vesicle		5	5	4	15,9	15,9	12,9	45,398	0	48,1	26690000	11	P06727	P06727	Apolipoprotein A-IV	APOA4
NaN	20.3715648651123	NaN	24.4620761871338	25.4408531188965	23.9765739440918	23.0192184448242	22.3996829986572	24.0193710327148	20.7177467346191	20.9855842590332	20.7931270599365				0	cell part;cytoplasmic membrane-bounded vesicle;cytosol;extracellular matrix;extracellular region;extracellular space;intracellular membrane-bounded organelle;intracellular organelle;organelle;synapse;vesicle		8	8	8	24,9	24,9	24,9	44,002	0	59,756	98168000	32	P07093;C9JN98	P07093;C9JN98	Glia-derived nexin	SERPINE2
26.4607486724854	26.9975509643555	26.7099094390869	26.8026733398438	27.2606925964355	26.340145111084	24.9140148162842	25.2586803436279	25.9862442016602	24.7944660186768	24.8997058868408	24.0759410858154				0	cell part;cytoplasm;cytosol;extracellular organelle;intracellular membrane-bounded organelle;intracellular organelle;membrane;mitochondrion;organelle;vesicle	Cysteine and methionine metabolism;Glycolysis / Gluconeogenesis;Propanoate metabolism;Pyruvate metabolism	12	12	11	39,5	39,5	35,9	36,638	0	161,58	1447800000	163	P07195;A8MW50;C9J7H8;F5H793;F5H5G7;F5H155;G3XAP5;F5H245;P07864	P07195;A8MW50;C9J7H8	L-lactate dehydrogenase B chain;L-lactate dehydrogenase	LDHB
22.4048099517822	24.9166126251221	22.9703559875488	23.9693031311035	22.3253135681152	24.0492630004883	20.6535091400146	20.8339900970459	20.3515396118164	NaN	NaN	20.5434970855713				0	cell body;cell part;cell projection;cilium;cytoplasm;cytoskeleton;cytosol;extracellular organelle;intracellular membrane-bounded organelle;intracellular non-membrane-bounded organelle;intracellular organelle;macromolecular complex;neuron projection;neuronal cell body;nucleus;organelle;protein complex;vesicle	Gap junction;Pathogenic Escherichia coli infection;Phagosome	12	12	2	39,2	39,2	6,3	47,766	0	115,89	236220000	68	Q5JP53;P07437;Q5ST81;P04350;A0A0B4J269;Q13509;K7ESM5;Q9BUF5;G3V2A3;A0A075B736;Q5SQY0;Q3ZCM7;A6NNZ2;M0R1I1;G3V5W4;M0QY85;G3V2R8;M0R042;G3V3R4;M0R2D3;M0QZL7;M0QYM7;G3V2N6;M0R278;CON__ENSEMBL:ENSBTAP00000025008;Q9H4B7	Q5JP53;P07437;Q5ST81;P04350;A0A0B4J269;Q13509	Tubulin beta chain;Tubulin beta-4A chain;Tubulin beta-3 chain	TUBB;TUBB4A;TUBB3
25.7893009185791	20.1639842987061	19.7170429229736	20.2828578948975	20.1602954864502	20.6480770111084	19.5994873046875	NaN	NaN	NaN	NaN	NaN				0	cell cortex;cell part;cell projection;cytoplasm;cytoskeleton;cytosol;extracellular organelle;intracellular membrane-bounded organelle;intracellular non-membrane-bounded organelle;intracellular organelle;membrane;neuron projection;nucleus;organelle;synapse;vesicle	Regulation of actin cytoskeleton;Shigellosis	6	6	6	55,7	55,7	55,7	15,054	0	55,248	273700000	19	P07737;K7EJ44;I3L3D5;CON__P02584	P07737;K7EJ44;I3L3D5	Profilin-1	PFN1
26.0116291046143	26.8791179656982	24.2957210540771	25.1381340026855	26.068826675415	25.2835502624512	23.7790641784668	23.5987796783447	24.192497253418	23.05690574646	22.9377956390381	21.7880363464355				0	cell body;cell part;cell projection;cell surface;cytoplasm;cytoplasmic membrane-bounded vesicle;cytosol;extracellular matrix;extracellular organelle;extracellular region;intracellular membrane-bounded organelle;intracellular organelle;macromolecular complex;membrane;mitochondrion;neuron projection;neuronal cell body;nucleoplasm;nucleus;organelle;plasma membrane;protein complex;vesicle	Antigen processing and presentation;NOD-like receptor signaling pathway;Pathways in cancer;Plant-pathogen interaction;Progesterone-mediated oocyte maturation;Prostate cancer;Protein processing in endoplasmic reticulum	23	12	12	35,7	19,1	19,1	84,659	0	300,54	814500000	106	P07900;G3V2J8;Q14568;Q58FF6;Q58FG0;Q58FG1	P07900	Heat shock protein HSP 90-alpha	HSP90AA1
28.4418983459473	28.7311096191406	26.4696884155273	26.8780651092529	27.9960422515869	27.7736682891846	25.7788887023926	25.8640308380127	26.2200374603271	24.6922149658203	24.916431427002	23.9237937927246				0	cell part;cytoplasm;cytoplasmic membrane-bounded vesicle;cytosol;extracellular organelle;intracellular membrane-bounded organelle;intracellular organelle;membrane;mitochondrion;nucleoplasm;organelle;vesicle	Antigen processing and presentation;NOD-like receptor signaling pathway;Pathways in cancer;Plant-pathogen interaction;Progesterone-mediated oocyte maturation;Prostate cancer;Protein processing in endoplasmic reticulum	29	29	13	43,8	43,8	21,4	83,263	0	323,31	4426400000	282	P08238;Q58FF7;F8W026;Q96GW1;A0A1W2PRR1	P08238	Heat shock protein HSP 90-beta	HSP90AB1
20.3540172576904	21.4922828674316	20.5381050109863	21.8157749176025	20.8686866760254	22.2047863006592	19.3296775817871	19.8918876647949	20.4363422393799	NaN	20.034158706665	NaN				0	cell part;cytoplasm;extracellular organelle;intracellular;membrane;organelle;vesicle		5	5	5	17,8	17,8	17,8	35,936	0	31,987	30504000	13	P08758;D6RBL5;D6RBE9;E9PHT9	P08758;D6RBL5;D6RBE9	Annexin A5;Annexin	ANXA5
24.3667297363281	24.26806640625	24.4455013275146	23.1419582366943	24.0932140350342	25.9638671875	24.4758071899414	24.2393608093262	24.7368602752686	23.6226558685303	23.5332641601563	23.3078594207764				0	cell part;cytoplasm;cytosol;extracellular organelle;extracellular space;intracellular;intracellular membrane-bounded organelle;intracellular organelle;macromolecular complex;membrane;mitochondrion;nucleus;organelle;plasma membrane;protein complex;vesicle	Drug metabolism - cytochrome P450;Glutathione metabolism;Metabolism of xenobiotics by cytochrome P450	6	6	6	43,3	43,3	43,3	23,356	0	323,31	438400000	63	P09211;A8MX94;A0A087X243;A0A087X2E9	P09211;A8MX94	Glutathione S-transferase P	GSTP1
22.2087802886963	23.0255336761475	21.3238868713379	20.8312091827393	21.6527652740479	NaN	20.2529201507568	20.2951316833496	21.1583232879639	NaN	21.30446434021	20.6720218658447				0	cell part;cell projection;cytoskeleton;cytosol;extracellular organelle;intracellular membrane-bounded organelle;intracellular non-membrane-bounded organelle;intracellular organelle;mitochondrion;neuron projection;organelle;vesicle	Carbon fixation in photosynthetic organisms;Fructose and mannose metabolism;Glycolysis / Gluconeogenesis;Pentose phosphate pathway	3	2	2	12,6	10,7	10,7	39,455	0	52,106	50622000	6	P09972;K7EKH5;J3KSV6;J3QKP5;A8MVZ9;C9J8F3	P09972;K7EKH5;J3KSV6;J3QKP5;A8MVZ9	Fructose-bisphosphate aldolase C;Fructose-bisphosphate aldolase	ALDOC
NaN	NaN	NaN	NaN	NaN	NaN	24.0694007873535	23.9751758575439	24.2570266723633	23.637767791748	23.1487674713135	23.4429092407227				0	extracellular matrix;extracellular region;proteinaceous extracellular matrix		5	5	5	15,3	15,3	15,3	40,165	0	46,827	64863000	21	P10915;D6RBS1;D6RC59;D6RAK7;D6RBX9;D6RFI7;D6RG04	P10915	Hyaluronan and proteoglycan link protein 1	HAPLN1
21.1055278778076	23.3307399749756	23.3790149688721	22.1756038665771	23.1033515930176	21.93678855896	20.2489891052246	20.4086246490479	20.8037281036377	NaN	NaN	NaN				0	cell part;centrosome;cytoplasm;DNA replication factor C complex;extracellular organelle;intracellular membrane-bounded organelle;intracellular non-membrane-bounded organelle;intracellular organelle;macromolecular complex;microtubule organizing center;nucleoplasm;nucleus;organelle;protein complex;vesicle	Base excision repair;Cell cycle;DNA replication;Mismatch repair;Nucleotide excision repair	2	2	2	10	10	10	28,768	0	31,263	66900000	19	P12004	P12004	Proliferating cell nuclear antigen	PCNA
20.2851181030273	20.2398128509521	19.8602695465088	19.717378616333	19.663064956665	20.0891304016113	19.8911304473877	NaN	19.756311416626	NaN	NaN	NaN				0	cell part;cytosol;extracellular organelle;intracellular membrane-bounded organelle;intracellular organelle;mitochondrion;organelle;vesicle	Arginine and proline metabolism	2	2	2	6	6	6	42,644	0	13,699	16805000	7	P12277;G3V461;G3V4N7	P12277;G3V461;G3V4N7	Creatine kinase B-type	CKB
26.4572772979736	26.362606048584	26.0237121582031	24.0405120849609	26.2652606964111	23.6458148956299	22.6990966796875	22.500524520874	22.5043621063232	21.5842609405518	21.1262855529785	21.1682758331299				0	cell part;cytoplasm;cytosol;extracellular organelle;intracellular membrane-bounded organelle;intracellular organelle;macromolecular complex;membrane;nucleus;organelle;plasma membrane;polysome;ribonucleoprotein complex;vesicle		17	17	17	23,3	23,3	23,3	95,337	0	140,03	916790000	70	P13639;K7EJ74;K7EP67;Q15029	P13639	Elongation factor 2	EEF2
25.4784622192383	26.0002613067627	26.1869945526123	25.0800552368164	25.7316150665283	22.8863048553467	21.4079494476318	21.6567420959473	22.3057460784912	20.3498115539551	21.9499530792236	NaN				0	cell part;cytoskeleton;cytosol;extracellular organelle;extracellular region;intracellular non-membrane-bounded organelle;intracellular organelle;macromolecular complex;membrane;organelle;plasma membrane;protein complex;vesicle	Adherens junction;Amoebiasis;Bacterial invasion of epithelial cells;Focal adhesion;Leukocyte transendothelial migration;Regulation of actin cytoskeleton;Shigellosis	18	18	18	22,2	22,2	22,2	123,8	0	174,55	622130000	90	P18206;A0A096LPE1	P18206	Vinculin	VCL
24.0084705352783	23.9743003845215	24.9783210754395	22.0884838104248	22.4436187744141	22.2987995147705	21.6509704589844	21.60964012146	21.5926342010498	21.2148971557617	21.0219478607178	NaN				0	cell cortex;cell part;extracellular organelle;intracellular membrane-bounded organelle;intracellular non-membrane-bounded organelle;intracellular organelle;macromolecular complex;membrane;nucleolus;nucleoplasm;nucleus;organelle;ribonucleoprotein complex;vesicle	Pathogenic Escherichia coli infection	10	10	10	17	17	17	76,613	0	98,639	312600000	37	P19338;H7BY16	P19338;H7BY16	Nucleolin	NCL
25.8435478210449	27.1042957305908	27.6381683349609	24.2180061340332	24.6271171569824	23.9163398742676	20.6898708343506	22.2828578948975	23.126522064209	NaN	21.9766616821289	NaN				0	cell body;cell part;cytoplasm;cytoskeleton;cytosol;extracellular organelle;extracellular region;intracellular membrane-bounded organelle;intracellular non-membrane-bounded organelle;intracellular organelle;macromolecular complex;membrane;neuronal cell body;nucleus;organelle;plasma membrane;protein complex;vesicle	Focal adhesion;MAPK signaling pathway	28	28	26	16,5	16,5	15,7	276,55	0	236,17	756310000	70	Q5HY54;P21333;A0A087WWY3;Q60FE5;F8WE98;H0Y5C6	Q5HY54;P21333;A0A087WWY3;Q60FE5	Filamin-A	FLNA
20.8833045959473	21.9513778686523	20.9492053985596	21.0820636749268	21.6795997619629	NaN	NaN	NaN	19.6043109893799	NaN	NaN	NaN				0	cell part;cytosol;extracellular organelle;membrane;organelle;vesicle	Purine metabolism	4	4	4	14,1	14,1	14,1	47,079	0	76,206	14310000	10	P22234;D6RF62;E9PBS1	P22234;D6RF62;E9PBS1	Multifunctional protein ADE2;Phosphoribosylaminoimidazole-succinocarboxamide synthase;Phosphoribosylaminoimidazole carboxylase	PAICS
23.8467063903809	24.5054874420166	24.4423408508301	22.6063003540039	24.0019588470459	21.7693901062012	21.5945491790771	21.1274833679199	21.6261367797852	20.9344501495361	21.6394901275635	21.4375610351563				0	cell part;cytoplasm;cytosol;extracellular organelle;intracellular membrane-bounded organelle;intracellular organelle;mitochondrion;nucleus;organelle;vesicle	Parkinson's disease;Ubiquitin mediated proteolysis	11	11	11	16	16	16	117,85	0	202,81	176100000	69	P22314;Q5JRR6;Q5JRS1;Q5JRS3;Q5JRS2;Q5JRR9;Q5JRS0	P22314	Ubiquitin-like modifier-activating enzyme 1	UBA1
NaN	NaN	NaN	NaN	NaN	22.0337219238281	23.3363361358643	23.6479015350342	22.4439220428467	NaN	NaN	NaN				0	extracellular matrix;extracellular organelle;extracellular region;extracellular space;organelle;proteinaceous extracellular matrix;vesicle		6	6	1	12,7	12,7	3,3	77,213	0	59,136	89122000	17	P23142	P23142	Fibulin-1	FBLN1
24.4785251617432	25.4781856536865	24.7263488769531	24.3638591766357	24.4146099090576	22.6475505828857	21.9132747650146	21.9955883026123	22.2012901306152	20.6577892303467	20.7255897521973	20.7947940826416				0	cell part;cytoplasm;cytoplasmic membrane-bounded vesicle;cytosol;extracellular organelle;intracellular membrane-bounded organelle;intracellular organelle;organelle;vesicle	Cysteine and methionine metabolism	7	7	7	18,1	18,1	18,1	47,716	0	51,315	279210000	36	P23526	P23526	Adenosylhomocysteinase	AHCY
24.2846794128418	23.6945552825928	23.1325130462646	23.0602416992188	24.8284702301025	23.0087776184082	22.2248802185059	22.042667388916	22.0966758728027	21.6407718658447	21.1588172912598	21.2272911071777				0	cell part;cytoplasm;cytosol;extracellular organelle;intracellular membrane-bounded organelle;intracellular organelle;membrane;nucleus;organelle;vesicle		6	6	6	16,5	16,5	16,5	50,118	0	38,698	216010000	16	P26641	P26641	Elongation factor 1-gamma	EEF1G
21.9454231262207	NaN	21.4572868347168	NaN	NaN	NaN	NaN	NaN	NaN	NaN	NaN	NaN				0	cell part;cytoplasm;cytoplasmic membrane-bounded vesicle;cytosol;extracellular organelle;extracellular space;intracellular membrane-bounded organelle;intracellular organelle;lysosome;membrane;organelle;vacuole;vesicle	Methane metabolism;Phenylalanine metabolism;Phenylpropanoid biosynthesis	3	3	3	17	17	17	25,035	0	19,102	43468000	9	P30041	P30041	Peroxiredoxin-6	PRDX6
22.7664623260498	24.0363254547119	24.1969299316406	22.6904468536377	23.408597946167	21.9906120300293	22.4467258453369	21.5784683227539	21.2860774993896	22.4198017120361	20.6789989471436	21.1480541229248				0	cell part;cytosol;extracellular organelle;intracellular membrane-bounded organelle;intracellular organelle;mitochondrion;organelle;vesicle	Antigen processing and presentation	9	9	9	14,9	14,9	14,9	94,33	0	162,13	118320000	43	P34932;A0A087WTS8;A0A087WYC1	P34932;A0A087WTS8;A0A087WYC1	Heat shock 70 kDa protein 4	HSPA4
23.5409698486328	24.3761692047119	24.1462383270264	23.5672073364258	24.5654640197754	23.4546279907227	22.0278301239014	22.3160610198975	22.6420936584473	21.7565402984619	22.1065826416016	21.7100296020508				0	cell part;cytoplasm;cytosol;extracellular organelle;Golgi apparatus;intracellular membrane-bounded organelle;intracellular organelle;membrane;organelle;vesicle		9	9	9	23,1	23,1	23,1	50,663	0	81,64	178270000	44	P50395;Q5SX87;V9GYJ7;V9GYF8;Q5SX90;Q5SX86;Q5SX91;P31150	P50395;Q5SX87	Rab GDP dissociation inhibitor beta	GDI2
23.4222679138184	23.9350814819336	22.5948219299316	23.1654262542725	23.5985527038574	22.8916721343994	22.2449016571045	22.4724388122559	22.7207546234131	NaN	NaN	NaN				0	cell part;cytoplasm;cytosol;extracellular organelle;extracellular space;intracellular;intracellular membrane-bounded organelle;intracellular organelle;membrane;nucleus;organelle;vesicle	Amoebiasis	6	6	6	21	21	21	42,403	0	126,37	103330000	14	P50453;P50452;H7BXK7;C9J7N5;A0A1B0GU38;A0A0C4DGW9;P30740;O75830	P50453	Serpin B9	SERPINB9
23.0107593536377	23.552038192749	23.916431427002	23.5665111541748	23.4412651062012	23.3360633850098	NaN	NaN	NaN	NaN	NaN	NaN				0	cell part;endoplasmic reticulum;extracellular organelle;extracellular space;intracellular membrane-bounded organelle;intracellular organelle;organelle;vesicle		5	5	5	14,8	14,8	14,8	46,44	0	33,882	148690000	17	P50454;E9PKH2;H0YEP8;E9PR70;E9PPV6;E9PQ34;E9PJH8;E9PIG2;E9PRS3;E9PNX1;E9PK86;E9PMI5	P50454;E9PKH2	Serpin H1	SERPINH1
21.3856925964355	NaN	21.1303768157959	NaN	21.0187606811523	NaN	NaN	NaN	20.1743850708008	NaN	NaN	NaN				0	cell part;cytoplasm;extracellular organelle;intracellular membrane-bounded organelle;intracellular organelle;membrane;nucleoplasm;nucleus;organelle;vesicle		4	4	4	6	6	6	110,42	0	26,161	30461000	10	P55060	P55060	Exportin-2	CSE1L
24.7569980621338	23.0625820159912	24.6667652130127	22.2343559265137	22.5518970489502	21.87428855896	20.288049697876	20.7249240875244	21.0487976074219	20.971549987793	20.4436435699463	19.7998924255371				0	cell part;cytoplasm;cytosol;endoplasmic reticulum;extracellular organelle;intracellular membrane-bounded organelle;intracellular organelle;lipid particle;macromolecular complex;membrane;nucleoplasm;nucleus;organelle;proteasome complex;protein complex;ubiquitin ligase complex;vesicle	Protein processing in endoplasmic reticulum	16	16	16	29,4	29,4	29,4	89,321	0	191,21	293430000	54	P55072;C9JUP7;C9IZA5	P55072	Transitional endoplasmic reticulum ATPase	VCP
23.1183071136475	23.08864402771	22.6963386535645	22.2944030761719	23.6109924316406	24.788106918335	23.1542339324951	23.6229915618896	25.0714874267578	22.9183444976807	23.0139808654785	23.4100227355957				0	cell part;cytosol;extracellular organelle;extracellular space;intracellular membrane-bounded organelle;intracellular organelle;nucleus;organelle;vesicle	Carbon fixation in photosynthetic organisms;Fructose and mannose metabolism;Glycolysis / Gluconeogenesis;Inositol phosphate metabolism	7	7	7	39,2	39,2	39,2	30,791	0	47,283	199190000	31	P60174;U3KQF3;U3KPZ0;U3KPS5	P60174	Triosephosphate isomerase	TPI1
NaN	20.5374412536621	20.5089130401611	NaN	NaN	20.0677604675293	20.0606536865234	20.1694984436035	22.0174694061279	19.9763126373291	20.1633701324463	NaN				0	cell part;cell projection;cytoplasm;extracellular organelle;intracellular membrane-bounded organelle;intracellular non-membrane-bounded organelle;intracellular organelle;macromolecular complex;membrane;nucleoplasm;nucleus;organelle;protein complex;ribonucleoprotein complex;spliceosomal complex;vesicle	Spliceosome	2	2	2	7,7	7,7	7,7	41,807	0	13,873	14725000	8	Q5T6W2;P61978	Q5T6W2;P61978	Heterogeneous nuclear ribonucleoprotein K	HNRNPK
NaN	23.2241744995117	21.9769420623779	21.0921669006348	NaN	20.4758567810059	NaN	NaN	NaN	NaN	NaN	NaN				0	cell part;cytoplasm;cytosol;extracellular organelle;intracellular membrane-bounded organelle;intracellular non-membrane-bounded organelle;intracellular organelle;macromolecular complex;membrane;nucleus;organelle;ribonucleoprotein complex;ribosome;small ribosomal subunit;vesicle	Ribosome	2	2	2	14,9	14,9	14,9	21,879	0	86,551	32299000	6	Q5JR95;P62241	Q5JR95;P62241	40S ribosomal protein S8	RPS8
22.2920455932617	22.8110580444336	22.3451900482178	21.0782241821289	22.6124095916748	23.6963596343994	22.182409286499	22.5227699279785	23.6302318572998	21.8950805664063	22.3606491088867	21.7670078277588				0	cell part;cell projection;cytoplasmic membrane-bounded vesicle;cytosol;extracellular organelle;intracellular membrane-bounded organelle;intracellular organelle;macromolecular complex;membrane;mitochondrion;neuron projection;organelle;protein complex;vesicle	Cell cycle;Neurotrophin signaling pathway;Oocyte meiosis	7	6	6	34,9	31	31	29,174	0	46,091	74499000	31	P62258;K7EM20;B4DJF2;I3L3T1;K7EIT4;I3L0W5	P62258	14-3-3 protein epsilon	YWHAE
23.0010643005371	23.3322429656982	22.8142318725586	21.9926528930664	22.8290023803711	22.5275497436523	NaN	NaN	NaN	NaN	NaN	NaN				0	cell part;cytosol;extracellular organelle;intracellular non-membrane-bounded organelle;intracellular organelle;macromolecular complex;membrane;organelle;polysome;ribonucleoprotein complex;ribosome;small ribosomal subunit;vesicle	Ribosome	6	6	6	21,3	21,3	21,3	29,597	0	37,92	98558000	25	P62701;C9JEH7;Q8TD47;P22090	P62701	40S ribosomal protein S4, X isoform	RPS4X
23.477783203125	19.8691844940186	20.255687713623	20.4775371551514	20.8304347991943	20.3483009338379	20.3581008911133	NaN	NaN	NaN	NaN	NaN				0	cell part;cytosol;extracellular organelle;extracellular region;extracellular space;intracellular membrane-bounded organelle;intracellular organelle;membrane;nucleus;organelle;vesicle		7	7	7	46,7	46,7	46,7	18,012	0	48,712	146230000	15	P62937;F8WE65;C9J5S7;E5RIZ5;Q9Y536	P62937;F8WE65;C9J5S7	Peptidyl-prolyl cis-trans isomerase A;Peptidyl-prolyl cis-trans isomerase A, N-terminally processed;Peptidyl-prolyl cis-trans isomerase	PPIA
23.4043159484863	23.4582633972168	23.1902980804443	22.0822257995605	23.417896270752	24.6936511993408	23.3410949707031	24.1019744873047	24.659761428833	23.2198238372803	23.4223957061768	23.0275936126709				0	cell leading edge;cell part;cytoplasm;cytoplasmic membrane-bounded vesicle;cytosol;extracellular organelle;extracellular space;intracellular membrane-bounded organelle;intracellular organelle;lysosome;macromolecular complex;membrane;mitochondrion;nucleoplasm;nucleus;organelle;protein complex;vacuole;vesicle	Cell cycle;Neurotrophin signaling pathway;Oocyte meiosis	9	9	8	46,9	46,9	42,9	27,745	0	135,18	277910000	99	P63104;E7EX29;B0AZS6;B7Z2E6;H0YB80;E7ESK7;E5RGE1;E5RIR4;E9PD24;E7EVZ2;P27348;P31946;Q04917;P61981	P63104;E7EX29;B0AZS6;B7Z2E6;H0YB80	14-3-3 protein zeta/delta	YWHAZ
26.4445533752441	27.2894725799561	26.8705596923828	26.6929874420166	27.2500667572021	26.2954406738281	24.9023303985596	25.2684936523438	25.4829006195068	23.5369434356689	23.6162757873535	23.2569541931152				0	cell body;cell part;cytoplasm;cytoskeleton;cytosol;extracellular organelle;extracellular space;intracellular membrane-bounded organelle;intracellular non-membrane-bounded organelle;intracellular organelle;macromolecular complex;membrane;neuronal cell body;nucleolus;nucleus;organelle;protein complex;vesicle	RNA transport	9	9	9	26,2	26,2	26,2	50,184	0	115,51	1646100000	138	Q5VTE0;P68104;A0A087WVQ9;A0A087WV01;Q05639;A6PW80;Q5JR01	Q5VTE0;P68104;A0A087WVQ9;A0A087WV01;Q05639	Putative elongation factor 1-alpha-like 3;Elongation factor 1-alpha 1;Elongation factor 1-alpha;Elongation factor 1-alpha 2	EEF1A1P5;EEF1A1;EEF1A2
NaN	NaN	NaN	NaN	NaN	19.8004760742188	20.7322311401367	21.4750652313232	20.6997318267822	20.044734954834	20.2096729278564	20.0780925750732				0	extracellular matrix;extracellular organelle;extracellular region;organelle;proteinaceous extracellular matrix;vesicle		2	2	2	3,2	3,2	3,2	126,57	0	15,985	9386900	6	P98095	P98095	Fibulin-2	FBLN2
NaN	NaN	NaN	NaN	NaN	NaN	22.0810890197754	22.3726005554199	21.2206954956055	26.2588424682617	26.186918258667	25.3795776367188				0	cell part;extracellular matrix;extracellular organelle;extracellular region;extracellular space;membrane;organelle;plasma membrane;vesicle	ECM-receptor interaction	16	16	16	6,1	6,1	6,1	468,83	0	106,17	99287000	50	P98160;A0A0U1RQT3	P98160	Basement membrane-specific heparan sulfate proteoglycan core protein;Endorepellin;LG3 peptide	HSPG2
25.0865077972412	26.3644618988037	26.5068206787109	25.1067333221436	25.1220645904541	26.2925128936768	22.0293140411377	21.1630001068115	NaN	NaN	NaN	NaN				0	cell part;cytoplasm;cytoplasmic membrane-bounded vesicle;cytosol;extracellular organelle;extracellular space;intracellular membrane-bounded organelle;intracellular non-membrane-bounded organelle;intracellular organelle;nucleolus;nucleus;organelle;vesicle	Peroxisome	8	8	7	44,2	44,2	38,7	22,11	0	55,657	731230000	71	Q06830;A0A0A0MSI0;A0A0A0MRQ5;H7C3T4;Q13162	Q06830;A0A0A0MSI0;A0A0A0MRQ5	Peroxiredoxin-1	PRDX1
NaN	21.7431621551514	22.4173812866211	23.8230857849121	23.9858093261719	22.9361419677734	25.2796955108643	25.4246711730957	24.2897529602051	23.8961524963379	25.1626930236816	24.0274085998535				0	extracellular organelle;extracellular region;extracellular space;organelle;vesicle		4	4	4	12,7	12,7	12,7	34,985	0	50,503	185840000	27	Q12841;C9J5G4	Q12841	Follistatin-related protein 1	FSTL1
NaN	NaN	NaN	NaN	NaN	NaN	22.9641284942627	23.3784866333008	21.0659866333008	22.0489635467529	22.4165840148926	22.0213375091553				0	cell part;cell surface;extracellular matrix;extracellular organelle;extracellular region;organelle;vesicle		4	4	3	5	5	4,3	151,25	0	109,69	28886000	13	Q14112;A0A087WZP6;H0YJV3	Q14112;A0A087WZP6;H0YJV3	Nidogen-2	NID2
18.8709602355957	NaN	NaN	18.9310779571533	19.2795734405518	19.9030990600586	21.5528583526611	21.1634311676025	20.2339744567871	20.1077632904053	19.9807815551758	19.5129680633545				0	cell part;cell surface;extracellular organelle;membrane;organelle;plasma membrane;vesicle	Arrhythmogenic right ventricular cardiomyopathy (ARVC)	3	3	3	3,6	3,6	3,6	122,29	0	18,376	16474000	6	Q14126;J3KSI6	Q14126;J3KSI6	Desmoglein-2	DSG2
22.7335968017578	22.6199283599854	22.2187156677246	22.0234031677246	21.999963760376	20.935962677002	NaN	20.6304092407227	20.6154003143311	NaN	20.213830947876	19.4279384613037				0	cell part;cytoplasm;cytosol;extracellular organelle;macromolecular complex;membrane;nuclear envelope;nuclear pore;nucleoplasm;organelle;protein complex;vesicle	RNA transport	8	8	8	13,1	13,1	13,1	97,169	0	208,34	81141000	44	Q14974;J3KTM9;J3QR48;J3QRG4	Q14974;J3KTM9	Importin subunit beta-1	KPNB1
23.7565402984619	23.0953884124756	21.3438625335693	21.4368495941162	21.7539730072021	21.6905536651611	NaN	NaN	NaN	NaN	NaN	NaN				0	cell part;cytoplasm;extracellular organelle;organelle;vesicle		8	1	1	20,2	3,9	3,9	44,348	0	7,5055	108260000	25	Q58FF8	Q58FF8	Putative heat shock protein HSP 90-beta 2	HSP90AB2P
21.7342166900635	21.3348903656006	21.1923770904541	21.1636161804199	20.9309196472168	NaN	NaN	NaN	NaN	NaN	NaN	NaN				0	cell part;cytoplasm;extracellular organelle;intracellular membrane-bounded organelle;intracellular organelle;macromolecular complex;membrane;nucleoplasm;nucleus;organelle;protein complex;ubiquitin ligase complex;vesicle		7	7	7	7,8	7,8	7,8	136,37	0	43,169	37459000	15	Q86VP6;A0A0C4DGH5	Q86VP6;A0A0C4DGH5	Cullin-associated NEDD8-dissociated protein 1	CAND1
NaN	NaN	NaN	NaN	NaN	NaN	NaN	19.736515045166	19.8905220031738	NaN	NaN	22.4104118347168				0	cell part;cytosol;extracellular matrix;extracellular organelle;extracellular space;organelle;vesicle		2	2	2	4	4	4	51,286	0	14,293	5683300	4	Q92743;H0Y7G9	Q92743;H0Y7G9	Serine protease HTRA1	HTRA1
21.8074264526367	21.2979335784912	21.1987438201904	20.9008026123047	21.1355209350586	20.5547790527344	19.8206996917725	NaN	20.6521968841553	NaN	NaN	NaN				0	cell part;cytoplasm;extracellular organelle;intracellular membrane-bounded organelle;intracellular non-membrane-bounded organelle;intracellular organelle;macromolecular complex;membrane;nucleolus;nucleoplasm;nucleus;organelle;ribonucleoprotein complex;vesicle		2	2	2	6,1	6,1	6,1	43,786	0	14,511	33171000	6	Q9UQ80;F8VR77	Q9UQ80;F8VR77	Proliferation-associated protein 2G4	PA2G4
24.3947334289551	25.5089378356934	24.9140148162842	23.3054943084717	23.7297229766846	23.1676940917969	20.7471446990967	21.0955181121826	20.9064655303955	NaN	NaN	NaN				0	cell part;cytoplasm;cytosol;extracellular organelle;organelle;vesicle	Glycine, serine and threonine metabolism;Methane metabolism;Vitamin B6 metabolism	8	8	8	21,9	21,9	21,9	40,422	0	134,86	225990000	53	Q9Y617	Q9Y617	Phosphoserine aminotransferase	PSAT1

## Sheet: Planilha6
CMd1_1	CMd1_2	CMd1_3	CMd4_1	CMd4_2	CMd4_3	CMd8_1	CMd8_2	CMd8_3	CMd15_1	CMd15_2	CMd15_3	Only identified by site	Reverse	Potential contaminant	nCM	GOCC slim name	KEGG name	Peptides	Razor + unique peptides	Unique peptides	Sequence coverage [%]	Unique + razor sequence coverage [%]	Unique sequence coverage [%]	Mol. weight [kDa]	Q-value	Score	Intensity	MS/MS count	Protein IDs	Majority protein IDs	Protein names	Gene names
#!{Type}E	E	E	E	E	E	E	E	E	E	E	E	C	C	C	C	C	C	N	N	N	N	N	N	N	N	N	N	N	T	T	T	T
#!{C:CM/day}CMd1	CMd1	CMd1	CMd4	CMd4	CMd4	CMd8	CMd8	CMd8	CMd15	CMd15	CMd15
24.4512367248535	23.1559944152832	22.6221199035645	21.0363750457764	21.7849655151367	21.0020275115967	20.653247833252	19.7518901824951	20.1698665618896	19.1213836669922	20.2624702453613	19.7154197692871				0	cell part;cytoplasm;cytoplasmic membrane-bounded vesicle;cytosol;extracellular organelle;intracellular membrane-bounded organelle;intracellular non-membrane-bounded organelle;intracellular organelle;macromolecular complex;membrane;mitochondrion;organelle;plasma membrane;protein complex;vesicle	Bacterial invasion of epithelial cells;Endocrine and other factor-regulated calcium reabsorption;Endocytosis;Huntington's disease;Lysosome	14	14	14	11,9	11,9	11,9	192,06	0	129,63	129410000	33	A0A087WVQ6;Q00610;J3KS13;A0A087WX41;P53675;J3KRF5;K7EJJ5;J3KSQ2;F5H5N6	A0A087WVQ6;Q00610	Clathrin heavy chain;Clathrin heavy chain 1	CLTC
22.4157848358154	25.5781631469727	22.5140514373779	22.2501163482666	22.6505336761475	22.3418273925781	17.9132289886475	19.6979560852051	17.3350868225098	18.0805473327637	17.9674606323242	18.4382991790771				0	cell part;cytosol;extracellular organelle;intracellular membrane-bounded organelle;intracellular organelle;nucleus;organelle;vesicle	Amino sugar and nucleotide sugar metabolism;Galactose metabolism;Pentose and glucuronate interconversions;Starch and sucrose metabolism	6	6	6	16,7	16,7	16,7	56,967	0	46,327	87911000	16	A0A087WYS1;E7EUC7;Q16851;C9JVG3;C9JQU9;C9JNZ1;C9JWG0;C9JTZ5;C9JUW1	A0A087WYS1;E7EUC7;Q16851;C9JVG3;C9JQU9;C9JNZ1	UTP--glucose-1-phosphate uridylyltransferase	UGP2
21.6070232391357	22.5935688018799	20.2043571472168	18.8021202087402	19.4587097167969	21.8502597808838	18.1997985839844	18.2665100097656	17.7540988922119	18.5210399627686	18.5600566864014	18.2303771972656				0	cell part;cytoplasm;cytosol;extracellular organelle;intracellular membrane-bounded organelle;intracellular organelle;macromolecular complex;nucleoplasm;nucleus;organelle;proteasome complex;protein complex;vesicle	Proteasome	2	2	2	11,2	11,2	11,2	25,041	0	12,976	50499000	3	A0A087WYS6;O14818;Q8TAA3;H0Y586	A0A087WYS6;O14818;Q8TAA3;H0Y586	Proteasome subunit alpha type-7;Proteasome subunit alpha type-7-like	PSMA8;PSMA7
20.1543273925781	22.74831199646	22.1645660400391	25.7771587371826	24.6907253265381	24.1656875610352	26.2883281707764	26.1726837158203	25.5389575958252	25.0883293151855	25.3946018218994	24.9652118682861				0	cell part;extracellular matrix;extracellular organelle;extracellular region;macromolecular complex;membrane;organelle;plasma membrane;protein complex;vesicle	ECM-receptor interaction;Focal adhesion;Protein digestion and absorption	10	10	10	13,4	13,4	13,4	108,34	0	96,348	383530000	59	A0A087X0S5;P12109	A0A087X0S5;P12109	Collagen alpha-1(VI) chain	COL6A1
22.2425479888916	22.1990451812744	23.4226512908936	21.6263599395752	22.4471797943115	22.8093318939209	21.0834922790527	21.5369205474854	21.9691619873047	20.6942157745361	21.2779293060303	21.0937786102295				0	cell part;cytoplasm;cytosol;extracellular organelle;intracellular membrane-bounded organelle;intracellular organelle;macromolecular complex;membrane;nucleus;organelle;plasma membrane;preribosome;ribonucleoprotein complex;small ribosomal subunit;vesicle	Ribosome	5	5	5	26,2	26,2	26,2	29,404	0	33,775	96314000	17	C9J9K3;A0A0C4DG17;P08865;F8WD59	C9J9K3;A0A0C4DG17;P08865;F8WD59	40S ribosomal protein SA	RPSA
19.4026107788086	19.4399662017822	19.6862850189209	18.5023326873779	20.5567436218262	22.4644088745117	22.3613185882568	22.5681114196777	17.5942497253418	18.8356895446777	18.6144199371338	18.6472911834717				0	cell part;extracellular organelle;extracellular region;extracellular space;membrane;organelle;plasma membrane;vesicle	Complement and coagulation cascades;Staphylococcus aureus infection	2	2	2	4,6	4,6	4,6	65,769	0	13,622	35676000	6	A0A0G2JH38;E7ETN3;B4E1Z4;P00751;H7C5H1	A0A0G2JH38;E7ETN3;B4E1Z4;P00751;H7C5H1	Complement factor B;Complement factor B Ba fragment;Complement factor B Bb fragment	CFB
22.6383209228516	21.8470134735107	23.928861618042	21.2775897979736	22.2624702453613	20.7399940490723	20.0247230529785	19.5633525848389	20.4430370330811	19.5680751800537	19.7183990478516	19.1827945709229				0	cell part;cytoplasm;cytoplasmic membrane-bounded vesicle;cytosol;extracellular organelle;Golgi apparatus;intracellular membrane-bounded organelle;intracellular organelle;membrane;mitochondrion;organelle;plasma membrane;vesicle	Fatty acid biosynthesis;Insulin signaling pathway	8	8	8	5	5	5	273,2	0	54,745	94344000	28	A0A0U1RQF0;P49327	A0A0U1RQF0;P49327	Fatty acid synthase;[Acyl-carrier-protein] S-acetyltransferase;[Acyl-carrier-protein] S-malonyltransferase;3-oxoacyl-[acyl-carrier-protein] synthase;3-oxoacyl-[acyl-carrier-protein] reductase;3-hydroxyacyl-[acyl-carrier-protein] dehydratase;Enoyl-[acyl-carrier-protein] reductase;Oleoyl-[acyl-carrier-protein] hydrolase	FASN
22.3265209197998	25.3211345672607	25.4643211364746	25.3443508148193	22.4048099517822	21.3647956848145	22.3264122009277	21.6799430847168	21.464183807373	22.1080837249756	22.1499462127686	21.9622936248779				0	cell part;chromosome;extracellular organelle;intracellular membrane-bounded organelle;intracellular non-membrane-bounded organelle;intracellular organelle;macromolecular complex;nuclear chromosome;nucleoplasm;nucleosome;nucleus;organelle;vesicle	Systemic lupus erythematosus	3	3	3	20,7	20,7	20,7	18,481	0	24,299	184080000	29	A0A0U1RR32;A0A0U1RRH7;Q99878;Q96KK5;Q9BTM1;Q16777;Q93077;Q7L7L0;Q6FI13;P20671;P0C0S8;P04908;H0YFX9;C9J0D1;Q71UI9;P0C0S5;Q96QV6;P16104;C9J386;Q8IUE6	A0A0U1RR32;A0A0U1RRH7;Q99878;Q96KK5;Q9BTM1;Q16777;Q93077;Q7L7L0;Q6FI13;P20671;P0C0S8;P04908;H0YFX9;C9J0D1;Q71UI9;P0C0S5;Q96QV6;P16104	Histone H2A type 1-J;Histone H2A type 1-H;Histone H2A.J;Histone H2A type 2-C;Histone H2A type 1-C;Histone H2A type 3;Histone H2A type 2-A;Histone H2A type 1-D;Histone H2A type 1;Histone H2A type 1-B/E;Histone H2A;Histone H2A.V;Histone H2A.Z;Histone H2A type 1-A;Histone H2AX	HIST1H2AJ;HIST1H2AH;H2AFJ;HIST2H2AC;HIST1H2AC;HIST3H2A;HIST2H2AA3;HIST1H2AD;HIST1H2AG;HIST1H2AB;H2AFV;H2AFZ;HIST1H2AA;H2AFX
21.0953254699707	20.5459480285645	18.9006118774414	20.5561847686768	20.6427116394043	21.9244823455811	18.7776126861572	19.615478515625	19.4255409240723	18.128023147583	20.3451633453369	19.6080169677734				0	cell part;cell projection;cilium;cytoplasm;cytosol;extracellular matrix;extracellular organelle;intracellular membrane-bounded organelle;intracellular organelle;membrane;mitochondrion;nucleus;organelle;plasma membrane;vesicle	Carbon fixation in photosynthetic organisms;Glycolysis / Gluconeogenesis;Purine metabolism;Pyruvate metabolism;Type II diabetes mellitus	5	5	5	15,1	15,1	15,1	49,897	0	32,906	32296000	6	B4DNK4;P14618;H3BTN5;H3BQ34;H3BR70	B4DNK4;P14618;H3BTN5;H3BQ34;H3BR70	Pyruvate kinase;Pyruvate kinase PKM	PKM
23.8990135192871	25.3178272247314	24.988151550293	22.4267520904541	21.7506637573242	22.5556926727295	21.4041080474854	21.661491394043	21.7457084655762	20.3425617218018	18.9226570129395	20.3462448120117				0	cell part;cytoplasm;cytoplasmic membrane-bounded vesicle;cytosol;endosome;extracellular organelle;intracellular;intracellular membrane-bounded organelle;intracellular non-membrane-bounded organelle;intracellular organelle;macromolecular complex;membrane;midbody;nuclear pore;nucleocytoplasmic shuttling complex;nucleolus;nucleoplasm;nucleus;organelle;protein complex;vesicle	Ribosome biogenesis in eukaryotes;RNA transport	5	5	5	33,3	33,3	33,3	22,436	0	89,257	193470000	22	F5H018;B5MDF5;J3KQE5;P62826;B4DV51;H0YFC6	F5H018;B5MDF5;J3KQE5;P62826;B4DV51	GTP-binding nuclear protein Ran	RAN
23.7226524353027	23.4974098205566	23.8152866363525	22.8873271942139	23.7383041381836	22.3078308105469	21.9575901031494	21.9351348876953	23.5374183654785	21.6681308746338	22.6085357666016	21.6676540374756				0	cell part;cytosol;extracellular organelle;intracellular membrane-bounded organelle;intracellular organelle;macromolecular complex;nucleoplasm;nucleus;organelle;ribonucleoprotein complex;vesicle		4	4	4	22,6	22,6	22,6	23,076	0	69,195	177530000	46	D6RAF8;Q14103;D6RF44;H0YA96;H0Y8G5;D6RD83;D6RBQ9;A0A087WUK2;O14979	D6RAF8;Q14103;D6RF44;H0YA96;H0Y8G5;D6RD83;D6RBQ9	Heterogeneous nuclear ribonucleoprotein D0	HNRNPD
20.6269397735596	20.3524017333984	19.8068237304688	21.3958187103271	20.6107730865479	23.3447570800781	20.6407718658447	20.9880828857422	19.438549041748	18.8957710266113	17.9573059082031	19.801664352417				0	cell part;cytoplasm;cytosol;extracellular organelle;organelle;vesicle	Nitrogen metabolism	2	2	2	24,1	24,1	24,1	9,4069	0	15,713	52342000	30	E5RJF6;E5RJI8;E5RH81;H0YBE2;E5RFE7;E5RHP7;P00915;E5RG81	E5RJF6;E5RJI8;E5RH81;H0YBE2;E5RFE7;E5RHP7;P00915;E5RG81	Carbonic anhydrase 1	CA1
23.3106346130371	21.9406299591064	22.1046962738037	22.3344268798828	22.3729724884033	23.6934928894043	20.2810478210449	20.1526412963867	17.9321346282959	19.3547916412354	19.6489200592041	19.6587657928467				0	apical part of cell;brush border;cell body;cell part;cell projection;cytoplasm;cytoskeleton;cytosol;extracellular organelle;extracellular space;filopodium;intracellular membrane-bounded organelle;intracellular non-membrane-bounded organelle;intracellular organelle;macromolecular complex;membrane;microvillus;nucleolus;nucleus;organelle;plasma membrane;protein complex;vesicle	Gastric acid secretion;Leukocyte transendothelial migration;Measles;Pathogenic Escherichia coli infection;Regulation of actin cytoskeleton	6	6	6	9,7	9,7	9,7	69,371	0	52,143	96286000	21	E7EQR4;P15311;P26038;P35241;V9GZ54;E9PQ82;E9PNV3	E7EQR4;P15311;P26038;P35241	Ezrin;Moesin;Radixin	EZR;MSN;RDX
22.6736602783203	22.8990325927734	22.6955108642578	22.0074100494385	22.501594543457	19.3071937561035	18.5558433532715	18.3572368621826	18.4960136413574	17.6269111633301	18.5309238433838	18.6516246795654				0	cell part;cytoplasm;cytosol;extracellular organelle;intracellular membrane-bounded organelle;intracellular non-membrane-bounded organelle;intracellular organelle;macromolecular complex;membrane;nucleolus;nucleus;organelle;ribonucleoprotein complex;ribosome;small ribosomal subunit;vesicle	Ribosome	4	4	4	21,6	21,6	21,6	25,371	0	26,535	61611000	11	E9PL09;P23396;E9PPU1;H0YEU2;F2Z2S8;H0YF32;H0YCJ7;E9PQ96;E9PSF4;E9PJH4;E9PK82	E9PL09;P23396;E9PPU1;H0YEU2;F2Z2S8;H0YF32;H0YCJ7	40S ribosomal protein S3	RPS3
22.9498825073242	22.4471035003662	22.9205074310303	22.5093002319336	22.9829235076904	22.4959716796875	22.2933654785156	19.1314811706543	18.3176498413086	21.9379386901855	22.2829151153564	21.9271621704102				0	cell part;cytosol;extracellular organelle;intracellular membrane-bounded organelle;intracellular organelle;nucleus;organelle;vesicle		4	4	4	5,1	5,1	5,1	102,99	0	24,108	115490000	8	E9PLK3;P55786;A6NEC2;H0YCQ5;E9PJ74;H0YDG0;E9PRQ5	E9PLK3;P55786;A6NEC2	Puromycin-sensitive aminopeptidase;Puromycin-sensitive aminopeptidase-like protein	NPEPPS;NPEPPSL1
21.5523433685303	21.5831604003906	21.4406051635742	23.2987995147705	23.645263671875	22.7791042327881	25.6943168640137	26.0580863952637	25.4770736694336	22.5484428405762	23.2183322906494	22.8948574066162				0	cell part;cell surface;cytoplasm;cytoplasmic membrane-bounded vesicle;extracellular matrix;extracellular region;extracellular space;intracellular membrane-bounded organelle;intracellular organelle;membrane;organelle;proteinaceous extracellular matrix;vesicle		5	5	5	28,9	28,9	28,9	17,47	0	68,465	217630000	30	F5GY03;P09486;E5RK62	F5GY03;P09486;E5RK62	SPARC	SPARC
18.4894237518311	17.7941112518311	18.3810195922852	17.8900032043457	17.7757778167725	19.5591716766357	19.3960781097412	18.1401538848877	18.5071029663086	19.2212791442871	19.2265758514404	19.1747264862061				0	cell part;cell surface;cytoplasm;cytoplasmic membrane-bounded vesicle;extracellular organelle;intracellular membrane-bounded organelle;intracellular organelle;membrane;nucleoplasm;nucleus;organelle;plasma membrane;vesicle	Protein digestion and absorption	2	2	2	4,3	4,3	4,3	64,872	0	12,26	7355900	2	F5GZS6;J3KPF3;P08195;H0YFX4;F5GZI0	F5GZS6;J3KPF3;P08195;H0YFX4;F5GZI0	4F2 cell-surface antigen heavy chain	SLC3A2
19.3313732147217	22.2242622375488	21.9863128662109	19.7528190612793	19.479061126709	18.6502895355225	18.3345069885254	19.0355396270752	18.6150379180908	19.2976016998291	18.9334163665771	18.8767070770264				0	cell part;cytosol;extracellular organelle;intracellular membrane-bounded organelle;intracellular organelle;membrane;mitochondrion;organelle;vesicle	One carbon pool by folate	4	4	4	4,5	4,5	4,5	110,61	0	32,389	20389000	5	F5H2F4;P11586;V9GYY3	F5H2F4;P11586	C-1-tetrahydrofolate synthase, cytoplasmic;Methylenetetrahydrofolate dehydrogenase;Methenyltetrahydrofolate cyclohydrolase;Formyltetrahydrofolate synthetase;C-1-tetrahydrofolate synthase, cytoplasmic, N-terminally processed	MTHFD1
23.933910369873	23.2616958618164	21.7758731842041	22.4675712585449	22.4394130706787	24.7491397857666	20.7521362304688	21.2374229431152	21.0016136169434	20.9728107452393	18.2684745788574	20.1879749298096				0	cell part;cytoplasm;cytosol;endosome;extracellular organelle;extracellular region;intracellular membrane-bounded organelle;intracellular organelle;macromolecular complex;nucleus;organelle;protein complex;vesicle	Gap junction;Pathogenic Escherichia coli infection;Phagosome	10	10	5	24,3	24,3	13,5	57,73	0	75,236	245730000	43	F5H5D3;Q9BQE3;Q71U36;P68363;A0A1W2PQM2;Q13748;Q6PEY2;F8VVB9;C9J2C0;P68366;V9GZ17;F8VRZ4;F8VS66;F8VQQ4;F8VRK0;F8VX09;F8VWV9;C9JDS9;A6NHL2;F8VXZ7;F8W0F6;Q9H853	F5H5D3;Q9BQE3;Q71U36;P68363;A0A1W2PQM2;Q13748;Q6PEY2;F8VVB9;C9J2C0;P68366	Tubulin alpha-1C chain;Tubulin alpha-1A chain;Tubulin alpha-1B chain;Tubulin alpha-3C/D chain;Tubulin alpha-3E chain;Tubulin alpha-4A chain	TUBA1C;TUBA1A;TUBA1B;TUBA3C;TUBA3E;TUBA8;TUBA4A
23.6727123260498	23.5723056793213	22.2982959747314	21.1749324798584	22.0246887207031	21.898551940918	21.0851154327393	20.810567855835	21.0911979675293	17.8436756134033	20.5108451843262	19.0397186279297				0	cell part;cytoplasm;cytoskeleton;extracellular organelle;intracellular non-membrane-bounded organelle;intracellular organelle;macromolecular complex;membrane;nucleoplasm;organelle;ribonucleoprotein complex;spliceosomal complex;vesicle	Spliceosome	5	5	5	42,1	42,1	42,1	16,536	0	32,315	153690000	19	F8VTQ5;F8W6I7;P09651;F8VZ49;Q32P51;F8VYN5;F8W646;H0YH80	F8VTQ5;F8W6I7;P09651;F8VZ49;Q32P51	Heterogeneous nuclear ribonucleoprotein A1;Heterogeneous nuclear ribonucleoprotein A1, N-terminally processed;Heterogeneous nuclear ribonucleoprotein A1-like 2	HNRNPA1;HNRNPA1L2
21.0460681915283	21.6786975860596	21.4005680084229	19.151969909668	21.2321014404297	22.2063674926758	20.8818874359131	20.9479942321777	20.8971862792969	20.4849281311035	18.3304653167725	19.2295799255371				0	cell part;cytoplasm;cytosol;extracellular organelle;intracellular membrane-bounded organelle;intracellular non-membrane-bounded organelle;intracellular organelle;macromolecular complex;membrane;nucleus;organelle;ribonucleoprotein complex;ribosome;vesicle	Ribosome	4	4	4	17,8	17,8	17,8	27,187	0	28,001	49120000	13	F8VU65;P05388;F8VPE8;G3V210;F8VW21;F8VWS0;Q8NHW5;F8VS58;F8VQY6;F8VRK7;F8VZS0;F8VWV4	F8VU65;P05388;F8VPE8;G3V210;F8VW21;F8VWS0;Q8NHW5;F8VS58;F8VQY6;F8VRK7;F8VZS0	60S acidic ribosomal protein P0;60S acidic ribosomal protein P0-like	RPLP0;RPLP0P6
19.6727466583252	22.2937297821045	23.3181037902832	22.6728420257568	23.5577735900879	21.783088684082	18.6865215301514	19.3276519775391	18.1676139831543	17.5120124816895	18.6312580108643	18.0827121734619				0	cell body;cell part;cell projection;cytoplasm;cytoskeleton;cytosol;extracellular organelle;intracellular membrane-bounded organelle;intracellular non-membrane-bounded organelle;intracellular organelle;macromolecular complex;midbody;mitochondrion;neuron projection;neuronal cell body;nucleus;organelle;ribonucleoprotein complex;small ribosomal subunit;vesicle	Measles	3	3	3	19,7	19,7	19,7	21,934	0	22,513	55952000	10	H0YAF8;J3KPE3;H0Y8W2;P63244;D6RAU2;E9PD14;D6RFX4;D6RFZ9;D6RHH4;D6R9Z1;H0YAM7;D6R9L0;H0Y9P0;D6RF23;D6RAC2;D6REE5	H0YAF8;J3KPE3;H0Y8W2;P63244;D6RAU2;E9PD14;D6RFX4;D6RFZ9;D6RHH4;D6R9Z1;H0YAM7;D6R9L0	Guanine nucleotide-binding protein subunit beta-2-like 1;Guanine nucleotide-binding protein subunit beta-2-like 1, N-terminally processed	GNB2L1
20.4446201324463	20.9587230682373	20.9841232299805	21.4618396759033	21.6475944519043	20.9106426239014	21.733678817749	21.7779216766357	19.1378326416016	17.0722141265869	18.5807361602783	17.5850925445557				0	cell part;cytoplasm;cytoplasmic membrane-bounded vesicle;cytosol;endoplasmic reticulum;extracellular matrix;extracellular organelle;extracellular region;extracellular space;Golgi apparatus;intracellular membrane-bounded organelle;intracellular organelle;macromolecular complex;membrane;mitochondrion;nucleus;organelle;vesicle		2	2	2	12,3	12,3	12,3	33,419	0	13,353	29324000	15	H0YC35;P10909;H0YAS8;E7ERK6;H0YLK8	H0YC35;P10909;H0YAS8;E7ERK6;H0YLK8	Clusterin;Clusterin;Clusterin beta chain;Clusterin alpha chain	CLU
18.9288387298584	19.4018707275391	18.7170295715332	19.5284843444824	20.4499416351318	20.2389965057373	19.2846336364746	19.2564067840576	19.487756729126	18.3775215148926	18.7989521026611	18.2866992950439				0	cell part;cell surface;extracellular organelle;intracellular membrane-bounded organelle;intracellular non-membrane-bounded organelle;intracellular organelle;macromolecular complex;membrane;mitochondrion;nucleus;organelle;plasma membrane;protein complex;proton-transporting two-sector ATPase complex;vesicle	Alzheimer's disease;Huntington's disease;Oxidative phosphorylation;Parkinson's disease	4	4	4	15,2	15,2	15,2	38,138	0	23,511	21381000	4	H0YH81;P06576;F8W079;F8W0P7;H0YI37	H0YH81;P06576;F8W079;F8W0P7	ATP synthase subunit beta;ATP synthase subunit beta, mitochondrial	ATP5B
19.677038192749	19.7487945556641	20.2226181030273	18.3505744934082	20.2462062835693	18.7937908172607	21.3596038818359	21.4898357391357	21.2917079925537	23.7027149200439	22.4654064178467	23.4122219085693				0	cell part;extracellular matrix;extracellular organelle;extracellular region;extracellular space;organelle;vesicle	Protein digestion and absorption	2	2	2	6,4	6,4	6,4	70,733	0	15,763	20049000	11	H7BXV5;P39060;H7C457	H7BXV5;P39060;H7C457	Collagen alpha-1(XVIII) chain;Endostatin	COL18A1
19.4463729858398	19.9674739837646	20.3298091888428	21.4879245758057	21.3271789550781	19.9676933288574	23.0766429901123	23.1199703216553	21.4045238494873	20.898811340332	18.4342250823975	20.5207576751709				0	cell part;endoplasmic reticulum;extracellular matrix;extracellular organelle;extracellular space;intracellular membrane-bounded organelle;intracellular organelle;organelle;proteinaceous extracellular matrix;vesicle		2	2	2	2,8	2,8	2,8	79,755	0	17,144	34944000	20	H7C1W1;Q92626	H7C1W1;Q92626	Peroxidasin homolog	PXDN
19.6740016937256	19.3000907897949	18.8127632141113	19.4000072479248	18.2952861785889	19.2860794067383	19.1995792388916	18.8889560699463	18.12917137146	18.9510536193848	21.8398818969727	23.2042942047119				0	cell part;cytoplasm;extracellular space		5	2	2	8,7	3,2	3,2	70,449	0	12,638	9206100	6	J3KMX3;P02771	J3KMX3;P02771	Alpha-fetoprotein	AFP
26.2152500152588	26.6738433837891	26.1627902984619	24.9070148468018	26.7283229827881	26.139949798584	23.7486801147461	24.1221046447754	24.8296794891357	24.1679077148438	24.7196273803711	24.5636615753174				0	cell part;cytoskeleton;cytosol;extracellular organelle;extracellular region;extracellular space;intracellular membrane-bounded organelle;intracellular non-membrane-bounded organelle;intracellular organelle;membrane;nucleus;organelle;vesicle	Carbon fixation in photosynthetic organisms;Fructose and mannose metabolism;Glycolysis / Gluconeogenesis;Pentose phosphate pathway	14	14	13	45,7	45,7	43,8	39,817	0	121,45	942230000	86	J3KPS3;P04075;H3BQN4;H3BPS8;H3BUH7;H3BR04;H3BMQ8;H3BU78;H3BR68;A0A087WXX2;P05062	J3KPS3;P04075;H3BQN4;H3BPS8;H3BUH7;H3BR04;H3BMQ8	Fructose-bisphosphate aldolase;Fructose-bisphosphate aldolase A	ALDOA
21.8947105407715	23.1332015991211	22.5978260040283	22.0871562957764	23.8042011260986	22.2252635955811	19.0818119049072	21.4380683898926	21.5724201202393	18.6393947601318	18.1028079986572	21.1486759185791				0	cell part;cytosol;extracellular organelle;intracellular membrane-bounded organelle;intracellular organelle;nucleus;organelle;vesicle	Glutathione metabolism;Pentose phosphate pathway	4	4	4	36,2	36,2	36,2	17,293	0	33,151	64578000	10	K7EMN2;K7EM49;P52209;K7EPF6	K7EMN2;K7EM49;P52209;K7EPF6	6-phosphogluconate dehydrogenase, decarboxylating	PGD
19.7897891998291	19.5907440185547	19.5190486907959	18.1395149230957	18.7751293182373	19.9218502044678	19.8307685852051	19.4528923034668	18.0131988525391	18.8670692443848	19.5816421508789	18.4888343811035				0	cell part;cytosol;extracellular organelle;intracellular non-membrane-bounded organelle;intracellular organelle;macromolecular complex;membrane;organelle;ribonucleoprotein complex;ribosome;small ribosomal subunit;vesicle	Ribosome	2	2	2	34	34	34	5,5575	0	12,06	16563000	8	M0QX76;M0R1M5;M0R3H0;M0R210;Q6IPX4;P62249	M0QX76;M0R1M5;M0R3H0;M0R210;Q6IPX4;P62249	40S ribosomal protein S16	RPS16
20.0251979827881	19.8008403778076	21.4410610198975	26.0760631561279	26.3211688995361	26.6588077545166	24.0576324462891	23.9868507385254	23.3924427032471	19.1228771209717	19.0362110137939	18.3661289215088				0	cell part;extracellular matrix;extracellular region;extracellular space	TGF-beta signaling pathway	8	8	8	29,2	29,2	29,2	40,92	0	62,709	278350000	50	O00292;O75610;A0A087WW09	O00292;O75610	Left-right determination factor 2;Left-right determination factor 1	LEFTY2;LEFTY1
23.7086200714111	24.2717037200928	24.4510478973389	23.1848468780518	23.9320201873779	23.8396129608154	21.5154724121094	21.7584533691406	21.936429977417	20.6947250366211	21.3984832763672	21.1120986938477				0	cell part;cell projection;cytoplasm;cytoskeleton;extracellular organelle;extracellular region;extracellular space;intracellular membrane-bounded organelle;intracellular non-membrane-bounded organelle;intracellular organelle;macromolecular complex;neuron projection;nucleus;organelle;protein complex;pseudopodium;ribonucleoprotein complex;vesicle	Adherens junction;Amoebiasis;Arrhythmogenic right ventricular cardiomyopathy (ARVC);Focal adhesion;Leukocyte transendothelial migration;Regulation of actin cytoskeleton;Systemic lupus erythematosus;Tight junction	8	8	3	11,7	11,7	5,4	104,85	0	103,19	211760000	46	O43707;H7C144;F5GXS2	O43707;H7C144;F5GXS2	Alpha-actinin-4	ACTN4
19.5302791595459	24.1106014251709	24.0065021514893	25.5975303649902	23.052417755127	19.2554397583008	22.3932018280029	22.5547332763672	18.2814025878906	18.058744430542	22.1804981231689	18.5568046569824				0	cell part;extracellular organelle;extracellular space;intracellular membrane-bounded organelle;intracellular organelle;macromolecular complex;nucleoplasm;nucleosome;nucleus;organelle;vesicle	Systemic lupus erythematosus	2	2	2	15,1	15,1	15,1	18,804	0	106,27	102590000	25	U3KQK0;Q99880;Q99879;Q99877;Q93079;Q5QNW6;P62807;P58876;P57053;O60814;Q8N257;Q16778;P33778;P23527;P06899	U3KQK0;Q99880;Q99879;Q99877;Q93079;Q5QNW6;P62807;P58876;P57053;O60814;Q8N257;Q16778;P33778;P23527;P06899	Histone H2B;Histone H2B type 1-L;Histone H2B type 1-M;Histone H2B type 1-N;Histone H2B type 1-H;Histone H2B type 2-F;Histone H2B type 1-C/E/F/G/I;Histone H2B type 1-D;Histone H2B type F-S;Histone H2B type 1-K;Histone H2B type 3-B;Histone H2B type 2-E;Histone H2B type 1-B;Histone H2B type 1-O;Histone H2B type 1-J	HIST1H2BN;HIST1H2BL;HIST1H2BM;HIST1H2BH;HIST2H2BF;HIST1H2BC;HIST1H2BD;H2BFS;HIST1H2BK;HIST3H2BB;HIST2H2BE;HIST1H2BB;HIST1H2BO;HIST1H2BJ
24.9750442504883	25.8465404510498	25.9392127990723	23.8303565979004	25.3946342468262	24.7002296447754	22.3879814147949	22.3933067321777	24.3467864990234	22.0043258666992	22.478796005249	21.875602722168				0	cell part;cytoplasm;cytosol;extracellular organelle;intracellular membrane-bounded organelle;intracellular organelle;microbody;mitochondrion;organelle;peroxisome;vesicle	Carbon fixation pathways in prokaryotes;Citrate cycle (TCA cycle);Glutathione metabolism;Peroxisome	8	8	8	22,9	22,9	22,9	46,659	0	67,296	354860000	48	O75874;C9J4N6;C9JJE5;C9JLU6;P48735	O75874;C9J4N6	Isocitrate dehydrogenase [NADP] cytoplasmic	IDH1
18.9993953704834	19.4804935455322	21.105655670166	22.3856391906738	22.1684894561768	21.5103626251221	23.1634006500244	23.4854202270508	21.9786529541016	21.9930686950684	22.0879001617432	22.0652961730957				0	cell part;cell projection;extracellular organelle;intracellular membrane-bounded organelle;intracellular organelle;membrane;nucleus;organelle;vesicle		4	4	4	6,3	6,3	6,3	88,039	0	30,086	54120000	15	Q5SR54;O94985	Q5SR54;O94985	Calsyntenin-1;Soluble Alc-alpha;CTF1-alpha	CLSTN1
19.4997043609619	23.4791412353516	23.4975318908691	24.2915115356445	24.3933582305908	27.7163333892822	22.1001472473145	18.6387195587158	22.9986057281494	19.5322761535645	17.553638458252	18.7110633850098				0	extracellular region;extracellular space	Wnt signaling pathway	6	6	6	42,3	42,3	42,3	30,083	0	50,1	297050000	21	O95813	O95813	Cerberus	CER1
25.6595153808594	25.7622299194336	25.7446308135986	25.5417366027832	26.260009765625	25.8483085632324	24.479944229126	24.4889793395996	25.8478546142578	25.0528736114502	25.0047035217285	24.3332672119141				0	cell part;cytosol;extracellular organelle;intracellular membrane-bounded organelle;intracellular organelle;membrane;mitochondrion;nucleus;organelle;vesicle	Cysteine and methionine metabolism;Glycolysis / Gluconeogenesis;Propanoate metabolism;Pyruvate metabolism	10	9	9	31,3	27,7	27,7	36,688	0	97,094	674670000	90	P00338;F5GYU2;F5GXY2;F5GXH2;F5H5J4;F5H6W8;F5GZQ4;F5H8H6;F5GXC7;F5GWW2;F5GXU1	P00338;F5GYU2;F5GXY2;F5GXH2	L-lactate dehydrogenase A chain	LDHA
19.4374713897705	19.7908916473389	19.4148426055908	19.4571399688721	18.9361877441406	18.7367115020752	24.5768089294434	24.5733451843262	23.2166004180908	23.730447769165	23.3214111328125	23.4230365753174				0	cell part;extracellular matrix;extracellular region;extracellular space	Amoebiasis;ECM-receptor interaction;Focal adhesion;Protein digestion and absorption	3	3	3	2,6	2,6	2,6	141,78	0	28,154	81051000	8	P02458	P02458	Collagen alpha-1(II) chain;Collagen alpha-1(II) chain;Chondrocalcin	COL2A1
23.2967014312744	24.6783103942871	24.1540641784668	26.9689502716064	26.7992172241211	26.0243053436279	27.8479251861572	27.6634979248047	28.0119590759277	27.0752067565918	26.5683670043945	26.8034114837646				0	cell body;cell part;cell projection;cytoplasm;endoplasmic reticulum;endosome;extracellular matrix;extracellular organelle;extracellular region;extracellular space;Golgi apparatus;intracellular membrane-bounded organelle;intracellular organelle;lysosome;macromolecular complex;membrane;neuron projection;neuronal cell body;nuclear envelope;nucleus;organelle;plasma membrane;protein complex;vacuole;ve…	Alzheimer's disease	14	14	14	49,2	49,2	49,2	36,154	0	323,31	1432800000	212	P02649;H0Y7L5;E9PEV4;E7ERP7;CON__Q03247	P02649;H0Y7L5	Apolipoprotein E	APOE
25.0991268157959	26.3637771606445	25.3623561859131	29.2285079956055	29.0598468780518	27.5175075531006	30.1302585601807	30.0432262420654	30.0867671966553	30.004638671875	29.3553771972656	29.5929718017578				0	cell part;extracellular matrix;extracellular organelle;extracellular region;extracellular space;intracellular membrane-bounded organelle;intracellular organelle;macromolecular complex;organelle;protein complex;vesicle	Amoebiasis;Bacterial invasion of epithelial cells;ECM-receptor interaction;Focal adhesion;Pathways in cancer;Regulation of actin cytoskeleton;Small cell lung cancer	50	50	50	33,9	33,9	33,9	262,62	0	323,31	6285800000	759	P02751;H0Y7Z1;H0Y4K8	P02751;H0Y7Z1	Fibronectin;Anastellin;Ugl-Y1;Ugl-Y2;Ugl-Y3	FN1
20.1477565765381	22.3422889709473	21.4548797607422	20.057674407959	19.4211311340332	19.7803268432617	19.5241279602051	20.0758762359619	18.6212139129639	21.1625099182129	21.2889518737793	23.7106189727783				0	cell body;cell part;cytoplasm;cytoskeleton;cytosol;endosome;extracellular organelle;extracellular region;extracellular space;Golgi apparatus;intracellular membrane-bounded organelle;intracellular non-membrane-bounded organelle;intracellular organelle;macromolecular complex;membrane;neuronal cell body;organelle;plasma membrane;vesicle	Fat digestion and absorption;Vitamin digestion and absorption	10	10	8	2,7	2,7	2,1	515,6	0	62,813	20093000	23	P04114;A8MUN2	P04114	Apolipoprotein B-100;Apolipoprotein B-48	APOB
19.2378540039063	20.8567333221436	19.1146850585938	21.1435775756836	20.8409957885742	20.9399127960205	24.2690658569336	20.9939670562744	18.5066223144531	17.7073993682861	19.0613117218018	18.0389747619629				0	cell part;cytoskeleton;cytosol;extracellular organelle;extracellular region;extracellular space;intracellular membrane-bounded organelle;intracellular non-membrane-bounded organelle;intracellular organelle;membrane;nucleus;organelle;plasma membrane;vesicle		6	6	6	52,7	52,7	52,7	10,834	0	40,855	525890000	15	P05109	P05109	Protein S100-A8;Protein S100-A8, N-terminally processed	S100A8
20.2206115722656	25.0441017150879	25.6408309936523	24.5048828125	23.8947658538818	19.1300029754639	19.2161540985107	19.16819190979	18.7161846160889	19.9898586273193	18.5284957885742	17.5320415496826				0	cell part;cytoplasm;cytosol;extracellular organelle;extracellular space;organelle;vesicle	PPAR signaling pathway	2	2	2	15,7	15,7	15,7	10,17	0	45,147	101860000	12	S4R3A2;S4R371;P05413	S4R3A2;S4R371;P05413	Fatty acid-binding protein, heart	FABP3
19.8336791992188	19.5775775909424	19.9652729034424	18.3585720062256	19.3841133117676	19.1593246459961	20.7154026031494	20.8962993621826	18.5805549621582	22.0767574310303	21.6039943695068	24.6034278869629				0	cell part;cytosol;endosome;extracellular organelle;extracellular region;extracellular space;intracellular membrane-bounded organelle;intracellular organelle;macromolecular complex;organelle;vesicle		5	5	4	15,9	15,9	12,9	45,398	0	48,1	26690000	11	P06727	P06727	Apolipoprotein A-IV	APOA4
20.5310611724854	20.3715648651123	20.6002635955811	24.4620761871338	25.4408531188965	23.9765739440918	23.0192184448242	22.3996829986572	24.0193710327148	20.7177467346191	20.9855842590332	20.7931270599365				0	cell part;cytoplasmic membrane-bounded vesicle;cytosol;extracellular matrix;extracellular region;extracellular space;intracellular membrane-bounded organelle;intracellular organelle;organelle;synapse;vesicle		8	8	8	24,9	24,9	24,9	44,002	0	59,756	98168000	32	P07093;C9JN98	P07093;C9JN98	Glia-derived nexin	SERPINE2
26.4607486724854	26.9975509643555	26.7099094390869	26.8026733398438	27.2606925964355	26.340145111084	24.9140148162842	25.2586803436279	25.9862442016602	24.7944660186768	24.8997058868408	24.0759410858154				0	cell part;cytoplasm;cytosol;extracellular organelle;intracellular membrane-bounded organelle;intracellular organelle;membrane;mitochondrion;organelle;vesicle	Cysteine and methionine metabolism;Glycolysis / Gluconeogenesis;Propanoate metabolism;Pyruvate metabolism	12	12	11	39,5	39,5	35,9	36,638	0	161,58	1447800000	163	P07195;A8MW50;C9J7H8;F5H793;F5H5G7;F5H155;G3XAP5;F5H245;P07864	P07195;A8MW50;C9J7H8	L-lactate dehydrogenase B chain;L-lactate dehydrogenase	LDHB
22.4048099517822	24.9166126251221	22.9703559875488	23.9693031311035	22.3253135681152	24.0492630004883	20.6535091400146	20.8339900970459	20.3515396118164	18.721529006958	17.9184989929199	20.5434970855713				0	cell body;cell part;cell projection;cilium;cytoplasm;cytoskeleton;cytosol;extracellular organelle;intracellular membrane-bounded organelle;intracellular non-membrane-bounded organelle;intracellular organelle;macromolecular complex;neuron projection;neuronal cell body;nucleus;organelle;protein complex;vesicle	Gap junction;Pathogenic Escherichia coli infection;Phagosome	12	12	2	39,2	39,2	6,3	47,766	0	115,89	236220000	68	Q5JP53;P07437;Q5ST81;P04350;A0A0B4J269;Q13509;K7ESM5;Q9BUF5;G3V2A3;A0A075B736;Q5SQY0;Q3ZCM7;A6NNZ2;M0R1I1;G3V5W4;M0QY85;G3V2R8;M0R042;G3V3R4;M0R2D3;M0QZL7;M0QYM7;G3V2N6;M0R278;CON__ENSEMBL:ENSBTAP00000025008;Q9H4B7	Q5JP53;P07437;Q5ST81;P04350;A0A0B4J269;Q13509	Tubulin beta chain;Tubulin beta-4A chain;Tubulin beta-3 chain	TUBB;TUBB4A;TUBB3
25.7893009185791	20.1639842987061	19.7170429229736	20.2828578948975	20.1602954864502	20.6480770111084	19.5994873046875	18.5312404632568	18.1474475860596	18.4924602508545	18.2471981048584	17.6507034301758				0	cell cortex;cell part;cell projection;cytoplasm;cytoskeleton;cytosol;extracellular organelle;intracellular membrane-bounded organelle;intracellular non-membrane-bounded organelle;intracellular organelle;membrane;neuron projection;nucleus;organelle;synapse;vesicle	Regulation of actin cytoskeleton;Shigellosis	6	6	6	55,7	55,7	55,7	15,054	0	55,248	273700000	19	P07737;K7EJ44;I3L3D5;CON__P02584	P07737;K7EJ44;I3L3D5	Profilin-1	PFN1
26.0116291046143	26.8791179656982	24.2957210540771	25.1381340026855	26.068826675415	25.2835502624512	23.7790641784668	23.5987796783447	24.192497253418	23.05690574646	22.9377956390381	21.7880363464355				0	cell body;cell part;cell projection;cell surface;cytoplasm;cytoplasmic membrane-bounded vesicle;cytosol;extracellular matrix;extracellular organelle;extracellular region;intracellular membrane-bounded organelle;intracellular organelle;macromolecular complex;membrane;mitochondrion;neuron projection;neuronal cell body;nucleoplasm;nucleus;organelle;plasma membrane;protein complex;vesicle	Antigen processing and presentation;NOD-like receptor signaling pathway;Pathways in cancer;Plant-pathogen interaction;Progesterone-mediated oocyte maturation;Prostate cancer;Protein processing in endoplasmic reticulum	23	12	12	35,7	19,1	19,1	84,659	0	300,54	814500000	106	P07900;G3V2J8;Q14568;Q58FF6;Q58FG0;Q58FG1	P07900	Heat shock protein HSP 90-alpha	HSP90AA1
28.4418983459473	28.7311096191406	26.4696884155273	26.8780651092529	27.9960422515869	27.7736682891846	25.7788887023926	25.8640308380127	26.2200374603271	24.6922149658203	24.916431427002	23.9237937927246				0	cell part;cytoplasm;cytoplasmic membrane-bounded vesicle;cytosol;extracellular organelle;intracellular membrane-bounded organelle;intracellular organelle;membrane;mitochondrion;nucleoplasm;organelle;vesicle	Antigen processing and presentation;NOD-like receptor signaling pathway;Pathways in cancer;Plant-pathogen interaction;Progesterone-mediated oocyte maturation;Prostate cancer;Protein processing in endoplasmic reticulum	29	29	13	43,8	43,8	21,4	83,263	0	323,31	4426400000	282	P08238;Q58FF7;F8W026;Q96GW1;A0A1W2PRR1	P08238	Heat shock protein HSP 90-beta	HSP90AB1
20.3540172576904	21.4922828674316	20.5381050109863	21.8157749176025	20.8686866760254	22.2047863006592	19.3296775817871	19.8918876647949	20.4363422393799	18.7440319061279	20.034158706665	17.9481449127197				0	cell part;cytoplasm;extracellular organelle;intracellular;membrane;organelle;vesicle		5	5	5	17,8	17,8	17,8	35,936	0	31,987	30504000	13	P08758;D6RBL5;D6RBE9;E9PHT9	P08758;D6RBL5;D6RBE9	Annexin A5;Annexin	ANXA5
24.3667297363281	24.26806640625	24.4455013275146	23.1419582366943	24.0932140350342	25.9638671875	24.4758071899414	24.2393608093262	24.7368602752686	23.6226558685303	23.5332641601563	23.3078594207764				0	cell part;cytoplasm;cytosol;extracellular organelle;extracellular space;intracellular;intracellular membrane-bounded organelle;intracellular organelle;macromolecular complex;membrane;mitochondrion;nucleus;organelle;plasma membrane;protein complex;vesicle	Drug metabolism - cytochrome P450;Glutathione metabolism;Metabolism of xenobiotics by cytochrome P450	6	6	6	43,3	43,3	43,3	23,356	0	323,31	438400000	63	P09211;A8MX94;A0A087X243;A0A087X2E9	P09211;A8MX94	Glutathione S-transferase P	GSTP1
22.2087802886963	23.0255336761475	21.3238868713379	20.8312091827393	21.6527652740479	19.5874919891357	20.2529201507568	20.2951316833496	21.1583232879639	18.6713485717773	21.30446434021	20.6720218658447				0	cell part;cell projection;cytoskeleton;cytosol;extracellular organelle;intracellular membrane-bounded organelle;intracellular non-membrane-bounded organelle;intracellular organelle;mitochondrion;neuron projection;organelle;vesicle	Carbon fixation in photosynthetic organisms;Fructose and mannose metabolism;Glycolysis / Gluconeogenesis;Pentose phosphate pathway	3	2	2	12,6	10,7	10,7	39,455	0	52,106	50622000	6	P09972;K7EKH5;J3KSV6;J3QKP5;A8MVZ9;C9J8F3	P09972;K7EKH5;J3KSV6;J3QKP5;A8MVZ9	Fructose-bisphosphate aldolase C;Fructose-bisphosphate aldolase	ALDOC
19.529670715332	19.3212203979492	20.0041313171387	18.2620162963867	19.2686614990234	19.4173908233643	24.0694007873535	23.9751758575439	24.2570266723633	23.637767791748	23.1487674713135	23.4429092407227				0	extracellular matrix;extracellular region;proteinaceous extracellular matrix		5	5	5	15,3	15,3	15,3	40,165	0	46,827	64863000	21	P10915;D6RBS1;D6RC59;D6RAK7;D6RBX9;D6RFI7;D6RG04	P10915	Hyaluronan and proteoglycan link protein 1	HAPLN1
21.1055278778076	23.3307399749756	23.3790149688721	22.1756038665771	23.1033515930176	21.93678855896	20.2489891052246	20.4086246490479	20.8037281036377	17.9019107818604	18.4564437866211	18.1909141540527				0	cell part;centrosome;cytoplasm;DNA replication factor C complex;extracellular organelle;intracellular membrane-bounded organelle;intracellular non-membrane-bounded organelle;intracellular organelle;macromolecular complex;microtubule organizing center;nucleoplasm;nucleus;organelle;protein complex;vesicle	Base excision repair;Cell cycle;DNA replication;Mismatch repair;Nucleotide excision repair	2	2	2	10	10	10	28,768	0	31,263	66900000	19	P12004	P12004	Proliferating cell nuclear antigen	PCNA
20.2851181030273	20.2398128509521	19.8602695465088	19.717378616333	19.663064956665	20.0891304016113	19.8911304473877	18.6680698394775	19.756311416626	17.8090190887451	18.8586101531982	17.9728736877441				0	cell part;cytosol;extracellular organelle;intracellular membrane-bounded organelle;intracellular organelle;mitochondrion;organelle;vesicle	Arginine and proline metabolism	2	2	2	6	6	6	42,644	0	13,699	16805000	7	P12277;G3V461;G3V4N7	P12277;G3V461;G3V4N7	Creatine kinase B-type	CKB
26.4572772979736	26.362606048584	26.0237121582031	24.0405120849609	26.2652606964111	23.6458148956299	22.6990966796875	22.500524520874	22.5043621063232	21.5842609405518	21.1262855529785	21.1682758331299				0	cell part;cytoplasm;cytosol;extracellular organelle;intracellular membrane-bounded organelle;intracellular organelle;macromolecular complex;membrane;nucleus;organelle;plasma membrane;polysome;ribonucleoprotein complex;vesicle		17	17	17	23,3	23,3	23,3	95,337	0	140,03	916790000	70	P13639;K7EJ74;K7EP67;Q15029	P13639	Elongation factor 2	EEF2
25.4784622192383	26.0002613067627	26.1869945526123	25.0800552368164	25.7316150665283	22.8863048553467	21.4079494476318	21.6567420959473	22.3057460784912	20.3498115539551	21.9499530792236	18.1889152526855				0	cell part;cytoskeleton;cytosol;extracellular organelle;extracellular region;intracellular non-membrane-bounded organelle;intracellular organelle;macromolecular complex;membrane;organelle;plasma membrane;protein complex;vesicle	Adherens junction;Amoebiasis;Bacterial invasion of epithelial cells;Focal adhesion;Leukocyte transendothelial migration;Regulation of actin cytoskeleton;Shigellosis	18	18	18	22,2	22,2	22,2	123,8	0	174,55	622130000	90	P18206;A0A096LPE1	P18206	Vinculin	VCL
24.0084705352783	23.9743003845215	24.9783210754395	22.0884838104248	22.4436187744141	22.2987995147705	21.6509704589844	21.60964012146	21.5926342010498	21.2148971557617	21.0219478607178	18.0603523254395				0	cell cortex;cell part;extracellular organelle;intracellular membrane-bounded organelle;intracellular non-membrane-bounded organelle;intracellular organelle;macromolecular complex;membrane;nucleolus;nucleoplasm;nucleus;organelle;ribonucleoprotein complex;vesicle	Pathogenic Escherichia coli infection	10	10	10	17	17	17	76,613	0	98,639	312600000	37	P19338;H7BY16	P19338;H7BY16	Nucleolin	NCL
25.8435478210449	27.1042957305908	27.6381683349609	24.2180061340332	24.6271171569824	23.9163398742676	20.6898708343506	22.2828578948975	23.126522064209	18.3121757507324	21.9766616821289	18.4262008666992				0	cell body;cell part;cytoplasm;cytoskeleton;cytosol;extracellular organelle;extracellular region;intracellular membrane-bounded organelle;intracellular non-membrane-bounded organelle;intracellular organelle;macromolecular complex;membrane;neuronal cell body;nucleus;organelle;plasma membrane;protein complex;vesicle	Focal adhesion;MAPK signaling pathway	28	28	26	16,5	16,5	15,7	276,55	0	236,17	756310000	70	Q5HY54;P21333;A0A087WWY3;Q60FE5;F8WE98;H0Y5C6	Q5HY54;P21333;A0A087WWY3;Q60FE5	Filamin-A	FLNA
20.8833045959473	21.9513778686523	20.9492053985596	21.0820636749268	21.6795997619629	19.3975772857666	18.5142230987549	18.4694385528564	19.6043109893799	18.3694877624512	18.8936805725098	17.7775173187256				0	cell part;cytosol;extracellular organelle;membrane;organelle;vesicle	Purine metabolism	4	4	4	14,1	14,1	14,1	47,079	0	76,206	14310000	10	P22234;D6RF62;E9PBS1	P22234;D6RF62;E9PBS1	Multifunctional protein ADE2;Phosphoribosylaminoimidazole-succinocarboxamide synthase;Phosphoribosylaminoimidazole carboxylase	PAICS
23.8467063903809	24.5054874420166	24.4423408508301	22.6063003540039	24.0019588470459	21.7693901062012	21.5945491790771	21.1274833679199	21.6261367797852	20.9344501495361	21.6394901275635	21.4375610351563				0	cell part;cytoplasm;cytosol;extracellular organelle;intracellular membrane-bounded organelle;intracellular organelle;mitochondrion;nucleus;organelle;vesicle	Parkinson's disease;Ubiquitin mediated proteolysis	11	11	11	16	16	16	117,85	0	202,81	176100000	69	P22314;Q5JRR6;Q5JRS1;Q5JRS3;Q5JRS2;Q5JRR9;Q5JRS0	P22314	Ubiquitin-like modifier-activating enzyme 1	UBA1
18.8004703521729	19.5952987670898	18.8766307830811	19.114185333252	19.5946369171143	22.0337219238281	23.3363361358643	23.6479015350342	22.4439220428467	18.2838668823242	19.8492641448975	18.3141918182373				0	extracellular matrix;extracellular organelle;extracellular region;extracellular space;organelle;proteinaceous extracellular matrix;vesicle		6	6	1	12,7	12,7	3,3	77,213	0	59,136	89122000	17	P23142	P23142	Fibulin-1	FBLN1
24.4785251617432	25.4781856536865	24.7263488769531	24.3638591766357	24.4146099090576	22.6475505828857	21.9132747650146	21.9955883026123	22.2012901306152	20.6577892303467	20.7255897521973	20.7947940826416				0	cell part;cytoplasm;cytoplasmic membrane-bounded vesicle;cytosol;extracellular organelle;intracellular membrane-bounded organelle;intracellular organelle;organelle;vesicle	Cysteine and methionine metabolism	7	7	7	18,1	18,1	18,1	47,716	0	51,315	279210000	36	P23526	P23526	Adenosylhomocysteinase	AHCY
24.2846794128418	23.6945552825928	23.1325130462646	23.0602416992188	24.8284702301025	23.0087776184082	22.2248802185059	22.042667388916	22.0966758728027	21.6407718658447	21.1588172912598	21.2272911071777				0	cell part;cytoplasm;cytosol;extracellular organelle;intracellular membrane-bounded organelle;intracellular organelle;membrane;nucleus;organelle;vesicle		6	6	6	16,5	16,5	16,5	50,118	0	38,698	216010000	16	P26641	P26641	Elongation factor 1-gamma	EEF1G
21.9454231262207	20.3750476837158	21.4572868347168	19.4212627410889	18.7050971984863	19.6469745635986	17.1107769012451	19.7161903381348	18.4359722137451	19.3959369659424	18.9096279144287	19.0374240875244				0	cell part;cytoplasm;cytoplasmic membrane-bounded vesicle;cytosol;extracellular organelle;extracellular space;intracellular membrane-bounded organelle;intracellular organelle;lysosome;membrane;organelle;vacuole;vesicle	Methane metabolism;Phenylalanine metabolism;Phenylpropanoid biosynthesis	3	3	3	17	17	17	25,035	0	19,102	43468000	9	P30041	P30041	Peroxiredoxin-6	PRDX6
22.7664623260498	24.0363254547119	24.1969299316406	22.6904468536377	23.408597946167	21.9906120300293	22.4467258453369	21.5784683227539	21.2860774993896	22.4198017120361	20.6789989471436	21.1480541229248				0	cell part;cytosol;extracellular organelle;intracellular membrane-bounded organelle;intracellular organelle;mitochondrion;organelle;vesicle	Antigen processing and presentation	9	9	9	14,9	14,9	14,9	94,33	0	162,13	118320000	43	P34932;A0A087WTS8;A0A087WYC1	P34932;A0A087WTS8;A0A087WYC1	Heat shock 70 kDa protein 4	HSPA4
23.5409698486328	24.3761692047119	24.1462383270264	23.5672073364258	24.5654640197754	23.4546279907227	22.0278301239014	22.3160610198975	22.6420936584473	21.7565402984619	22.1065826416016	21.7100296020508				0	cell part;cytoplasm;cytosol;extracellular organelle;Golgi apparatus;intracellular membrane-bounded organelle;intracellular organelle;membrane;organelle;vesicle		9	9	9	23,1	23,1	23,1	50,663	0	81,64	178270000	44	P50395;Q5SX87;V9GYJ7;V9GYF8;Q5SX90;Q5SX86;Q5SX91;P31150	P50395;Q5SX87	Rab GDP dissociation inhibitor beta	GDI2
23.4222679138184	23.9350814819336	22.5948219299316	23.1654262542725	23.5985527038574	22.8916721343994	22.2449016571045	22.4724388122559	22.7207546234131	19.6310596466064	18.053524017334	19.4602203369141				0	cell part;cytoplasm;cytosol;extracellular organelle;extracellular space;intracellular;intracellular membrane-bounded organelle;intracellular organelle;membrane;nucleus;organelle;vesicle	Amoebiasis	6	6	6	21	21	21	42,403	0	126,37	103330000	14	P50453;P50452;H7BXK7;C9J7N5;A0A1B0GU38;A0A0C4DGW9;P30740;O75830	P50453	Serpin B9	SERPINB9
23.0107593536377	23.552038192749	23.916431427002	23.5665111541748	23.4412651062012	23.3360633850098	18.6455726623535	18.9682846069336	17.7718982696533	20.2567195892334	19.6053409576416	18.781270980835				0	cell part;endoplasmic reticulum;extracellular organelle;extracellular space;intracellular membrane-bounded organelle;intracellular organelle;organelle;vesicle		5	5	5	14,8	14,8	14,8	46,44	0	33,882	148690000	17	P50454;E9PKH2;H0YEP8;E9PR70;E9PPV6;E9PQ34;E9PJH8;E9PIG2;E9PRS3;E9PNX1;E9PK86;E9PMI5	P50454;E9PKH2	Serpin H1	SERPINH1
21.3856925964355	19.0773258209229	21.1303768157959	18.9473171234131	21.0187606811523	19.647008895874	18.2806873321533	18.2507801055908	20.1743850708008	18.3443241119385	18.21142578125	18.5970878601074				0	cell part;cytoplasm;extracellular organelle;intracellular membrane-bounded organelle;intracellular organelle;membrane;nucleoplasm;nucleus;organelle;vesicle		4	4	4	6	6	6	110,42	0	26,161	30461000	10	P55060	P55060	Exportin-2	CSE1L
24.7569980621338	23.0625820159912	24.6667652130127	22.2343559265137	22.5518970489502	21.87428855896	20.288049697876	20.7249240875244	21.0487976074219	20.971549987793	20.4436435699463	19.7998924255371				0	cell part;cytoplasm;cytosol;endoplasmic reticulum;extracellular organelle;intracellular membrane-bounded organelle;intracellular organelle;lipid particle;macromolecular complex;membrane;nucleoplasm;nucleus;organelle;proteasome complex;protein complex;ubiquitin ligase complex;vesicle	Protein processing in endoplasmic reticulum	16	16	16	29,4	29,4	29,4	89,321	0	191,21	293430000	54	P55072;C9JUP7;C9IZA5	P55072	Transitional endoplasmic reticulum ATPase	VCP
23.1183071136475	23.08864402771	22.6963386535645	22.2944030761719	23.6109924316406	24.788106918335	23.1542339324951	23.6229915618896	25.0714874267578	22.9183444976807	23.0139808654785	23.4100227355957				0	cell part;cytosol;extracellular organelle;extracellular space;intracellular membrane-bounded organelle;intracellular organelle;nucleus;organelle;vesicle	Carbon fixation in photosynthetic organisms;Fructose and mannose metabolism;Glycolysis / Gluconeogenesis;Inositol phosphate metabolism	7	7	7	39,2	39,2	39,2	30,791	0	47,283	199190000	31	P60174;U3KQF3;U3KPZ0;U3KPS5	P60174	Triosephosphate isomerase	TPI1
19.379508972168	20.5374412536621	20.5089130401611	19.1348476409912	19.7438774108887	20.0677604675293	20.0606536865234	20.1694984436035	22.0174694061279	19.9763126373291	20.1633701324463	17.5271987915039				0	cell part;cell projection;cytoplasm;extracellular organelle;intracellular membrane-bounded organelle;intracellular non-membrane-bounded organelle;intracellular organelle;macromolecular complex;membrane;nucleoplasm;nucleus;organelle;protein complex;ribonucleoprotein complex;spliceosomal complex;vesicle	Spliceosome	2	2	2	7,7	7,7	7,7	41,807	0	13,873	14725000	8	Q5T6W2;P61978	Q5T6W2;P61978	Heterogeneous nuclear ribonucleoprotein K	HNRNPK
19.5333957672119	23.2241744995117	21.9769420623779	21.0921669006348	20.7403583526611	20.4758567810059	19.0513515472412	18.9535884857178	19.6816215515137	18.791576385498	19.1316928863525	18.5704040527344				0	cell part;cytoplasm;cytosol;extracellular organelle;intracellular membrane-bounded organelle;intracellular non-membrane-bounded organelle;intracellular organelle;macromolecular complex;membrane;nucleus;organelle;ribonucleoprotein complex;ribosome;small ribosomal subunit;vesicle	Ribosome	2	2	2	14,9	14,9	14,9	21,879	0	86,551	32299000	6	Q5JR95;P62241	Q5JR95;P62241	40S ribosomal protein S8	RPS8
22.2920455932617	22.8110580444336	22.3451900482178	21.0782241821289	22.6124095916748	23.6963596343994	22.182409286499	22.5227699279785	23.6302318572998	21.8950805664063	22.3606491088867	21.7670078277588				0	cell part;cell projection;cytoplasmic membrane-bounded vesicle;cytosol;extracellular organelle;intracellular membrane-bounded organelle;intracellular organelle;macromolecular complex;membrane;mitochondrion;neuron projection;organelle;protein complex;vesicle	Cell cycle;Neurotrophin signaling pathway;Oocyte meiosis	7	6	6	34,9	31	31	29,174	0	46,091	74499000	31	P62258;K7EM20;B4DJF2;I3L3T1;K7EIT4;I3L0W5	P62258	14-3-3 protein epsilon	YWHAE
23.0010643005371	23.3322429656982	22.8142318725586	21.9926528930664	22.8290023803711	22.5275497436523	18.7596912384033	17.5684719085693	19.400260925293	18.5983924865723	18.6260452270508	18.767765045166				0	cell part;cytosol;extracellular organelle;intracellular non-membrane-bounded organelle;intracellular organelle;macromolecular complex;membrane;organelle;polysome;ribonucleoprotein complex;ribosome;small ribosomal subunit;vesicle	Ribosome	6	6	6	21,3	21,3	21,3	29,597	0	37,92	98558000	25	P62701;C9JEH7;Q8TD47;P22090	P62701	40S ribosomal protein S4, X isoform	RPS4X
23.477783203125	19.8691844940186	20.255687713623	20.4775371551514	20.8304347991943	20.3483009338379	20.3581008911133	18.9653244018555	18.597562789917	18.9853801727295	18.6531181335449	18.6804828643799				0	cell part;cytosol;extracellular organelle;extracellular region;extracellular space;intracellular membrane-bounded organelle;intracellular organelle;membrane;nucleus;organelle;vesicle		7	7	7	46,7	46,7	46,7	18,012	0	48,712	146230000	15	P62937;F8WE65;C9J5S7;E5RIZ5;Q9Y536	P62937;F8WE65;C9J5S7	Peptidyl-prolyl cis-trans isomerase A;Peptidyl-prolyl cis-trans isomerase A, N-terminally processed;Peptidyl-prolyl cis-trans isomerase	PPIA
23.4043159484863	23.4582633972168	23.1902980804443	22.0822257995605	23.417896270752	24.6936511993408	23.3410949707031	24.1019744873047	24.659761428833	23.2198238372803	23.4223957061768	23.0275936126709				0	cell leading edge;cell part;cytoplasm;cytoplasmic membrane-bounded vesicle;cytosol;extracellular organelle;extracellular space;intracellular membrane-bounded organelle;intracellular organelle;lysosome;macromolecular complex;membrane;mitochondrion;nucleoplasm;nucleus;organelle;protein complex;vacuole;vesicle	Cell cycle;Neurotrophin signaling pathway;Oocyte meiosis	9	9	8	46,9	46,9	42,9	27,745	0	135,18	277910000	99	P63104;E7EX29;B0AZS6;B7Z2E6;H0YB80;E7ESK7;E5RGE1;E5RIR4;E9PD24;E7EVZ2;P27348;P31946;Q04917;P61981	P63104;E7EX29;B0AZS6;B7Z2E6;H0YB80	14-3-3 protein zeta/delta	YWHAZ
26.4445533752441	27.2894725799561	26.8705596923828	26.6929874420166	27.2500667572021	26.2954406738281	24.9023303985596	25.2684936523438	25.4829006195068	23.5369434356689	23.6162757873535	23.2569541931152				0	cell body;cell part;cytoplasm;cytoskeleton;cytosol;extracellular organelle;extracellular space;intracellular membrane-bounded organelle;intracellular non-membrane-bounded organelle;intracellular organelle;macromolecular complex;membrane;neuronal cell body;nucleolus;nucleus;organelle;protein complex;vesicle	RNA transport	9	9	9	26,2	26,2	26,2	50,184	0	115,51	1646100000	138	Q5VTE0;P68104;A0A087WVQ9;A0A087WV01;Q05639;A6PW80;Q5JR01	Q5VTE0;P68104;A0A087WVQ9;A0A087WV01;Q05639	Putative elongation factor 1-alpha-like 3;Elongation factor 1-alpha 1;Elongation factor 1-alpha;Elongation factor 1-alpha 2	EEF1A1P5;EEF1A1;EEF1A2
20.6647167205811	19.4152050018311	19.3727989196777	19.3741130828857	20.0973701477051	19.8004760742188	20.7322311401367	21.4750652313232	20.6997318267822	20.044734954834	20.2096729278564	20.0780925750732				0	extracellular matrix;extracellular organelle;extracellular region;organelle;proteinaceous extracellular matrix;vesicle		2	2	2	3,2	3,2	3,2	126,57	0	15,985	9386900	6	P98095	P98095	Fibulin-2	FBLN2
19.4850006103516	19.5397605895996	19.3440742492676	19.0416469573975	20.0676708221436	18.9709129333496	22.0810890197754	22.3726005554199	21.2206954956055	26.2588424682617	26.186918258667	25.3795776367188				0	cell part;extracellular matrix;extracellular organelle;extracellular region;extracellular space;membrane;organelle;plasma membrane;vesicle	ECM-receptor interaction	16	16	16	6,1	6,1	6,1	468,83	0	106,17	99287000	50	P98160;A0A0U1RQT3	P98160	Basement membrane-specific heparan sulfate proteoglycan core protein;Endorepellin;LG3 peptide	HSPG2
25.0865077972412	26.3644618988037	26.5068206787109	25.1067333221436	25.1220645904541	26.2925128936768	22.0293140411377	21.1630001068115	18.4026584625244	19.1278896331787	17.8748550415039	19.1509494781494				0	cell part;cytoplasm;cytoplasmic membrane-bounded vesicle;cytosol;extracellular organelle;extracellular space;intracellular membrane-bounded organelle;intracellular non-membrane-bounded organelle;intracellular organelle;nucleolus;nucleus;organelle;vesicle	Peroxisome	8	8	7	44,2	44,2	38,7	22,11	0	55,657	731230000	71	Q06830;A0A0A0MSI0;A0A0A0MRQ5;H7C3T4;Q13162	Q06830;A0A0A0MSI0;A0A0A0MRQ5	Peroxiredoxin-1	PRDX1
19.1351699829102	21.7431621551514	22.4173812866211	23.8230857849121	23.9858093261719	22.9361419677734	25.2796955108643	25.4246711730957	24.2897529602051	23.8961524963379	25.1626930236816	24.0274085998535				0	extracellular organelle;extracellular region;extracellular space;organelle;vesicle		4	4	4	12,7	12,7	12,7	34,985	0	50,503	185840000	27	Q12841;C9J5G4	Q12841	Follistatin-related protein 1	FSTL1
20.1809692382813	19.0387401580811	20.0637130737305	18.4764499664307	19.9645595550537	19.3037223815918	22.9641284942627	23.3784866333008	21.0659866333008	22.0489635467529	22.4165840148926	22.0213375091553				0	cell part;cell surface;extracellular matrix;extracellular organelle;extracellular region;organelle;vesicle		4	4	3	5	5	4,3	151,25	0	109,69	28886000	13	Q14112;A0A087WZP6;H0YJV3	Q14112;A0A087WZP6;H0YJV3	Nidogen-2	NID2
18.8709602355957	19.5813159942627	18.8951015472412	18.9310779571533	19.2795734405518	19.9030990600586	21.5528583526611	21.1634311676025	20.2339744567871	20.1077632904053	19.9807815551758	19.5129680633545				0	cell part;cell surface;extracellular organelle;membrane;organelle;plasma membrane;vesicle	Arrhythmogenic right ventricular cardiomyopathy (ARVC)	3	3	3	3,6	3,6	3,6	122,29	0	18,376	16474000	6	Q14126;J3KSI6	Q14126;J3KSI6	Desmoglein-2	DSG2
22.7335968017578	22.6199283599854	22.2187156677246	22.0234031677246	21.999963760376	20.935962677002	19.324125289917	20.6304092407227	20.6154003143311	17.2132625579834	20.213830947876	19.4279384613037				0	cell part;cytoplasm;cytosol;extracellular organelle;macromolecular complex;membrane;nuclear envelope;nuclear pore;nucleoplasm;organelle;protein complex;vesicle	RNA transport	8	8	8	13,1	13,1	13,1	97,169	0	208,34	81141000	44	Q14974;J3KTM9;J3QR48;J3QRG4	Q14974;J3KTM9	Importin subunit beta-1	KPNB1
23.7565402984619	23.0953884124756	21.3438625335693	21.4368495941162	21.7539730072021	21.6905536651611	18.5865268707275	19.1364803314209	17.832986831665	19.5387382507324	18.8090572357178	18.8450546264648				0	cell part;cytoplasm;extracellular organelle;organelle;vesicle		8	1	1	20,2	3,9	3,9	44,348	0	7,5055	108260000	25	Q58FF8	Q58FF8	Putative heat shock protein HSP 90-beta 2	HSP90AB2P
21.7342166900635	21.3348903656006	21.1923770904541	21.1636161804199	20.9309196472168	19.4935283660889	20.0197429656982	18.7582263946533	18.5146961212158	18.56174659729	18.0662078857422	20.055196762085				0	cell part;cytoplasm;extracellular organelle;intracellular membrane-bounded organelle;intracellular organelle;macromolecular complex;membrane;nucleoplasm;nucleus;organelle;protein complex;ubiquitin ligase complex;vesicle		7	7	7	7,8	7,8	7,8	136,37	0	43,169	37459000	15	Q86VP6;A0A0C4DGH5	Q86VP6;A0A0C4DGH5	Cullin-associated NEDD8-dissociated protein 1	CAND1
19.4027366638184	19.416690826416	18.5216636657715	18.956693649292	19.9310398101807	19.5428581237793	18.615119934082	19.736515045166	19.8905220031738	18.6053352355957	18.5716743469238	22.4104118347168				0	cell part;cytosol;extracellular matrix;extracellular organelle;extracellular space;organelle;vesicle		2	2	2	4	4	4	51,286	0	14,293	5683300	4	Q92743;H0Y7G9	Q92743;H0Y7G9	Serine protease HTRA1	HTRA1
21.8074264526367	21.2979335784912	21.1987438201904	20.9008026123047	21.1355209350586	20.5547790527344	19.8206996917725	18.6266918182373	20.6521968841553	19.0961360931396	19.0765933990479	18.8150577545166				0	cell part;cytoplasm;extracellular organelle;intracellular membrane-bounded organelle;intracellular non-membrane-bounded organelle;intracellular organelle;macromolecular complex;membrane;nucleolus;nucleoplasm;nucleus;organelle;ribonucleoprotein complex;vesicle		2	2	2	6,1	6,1	6,1	43,786	0	14,511	33171000	6	Q9UQ80;F8VR77	Q9UQ80;F8VR77	Proliferation-associated protein 2G4	PA2G4
24.3947334289551	25.5089378356934	24.9140148162842	23.3054943084717	23.7297229766846	23.1676940917969	20.7471446990967	21.0955181121826	20.9064655303955	18.1577205657959	18.2305679321289	17.9356212615967				0	cell part;cytoplasm;cytosol;extracellular organelle;organelle;vesicle	Glycine, serine and threonine metabolism;Methane metabolism;Vitamin B6 metabolism	8	8	8	21,9	21,9	21,9	40,422	0	134,86	225990000	53	Q9Y617	Q9Y617	Phosphoserine aminotransferase	PSAT1

## Sheet: Planilha7
CMd1_1	CMd1_2	CMd1_3	CMd4_1	CMd4_2	CMd4_3	CMd8_1	CMd8_2	CMd8_3	CMd15_1	CMd15_2	CMd15_3	Only identified by site	Reverse	Potential contaminant	nCM	GOCC slim name	KEGG name	Cluster	Student's T-test Significant CMd4_CMd1	Student's T-test significant	Student's T-test Significant CMd8_CMd4	Student's T-test significant_	Student's T-test Significant CMd15_CMd8	Student's T-test significant__	Student's T-test Significant CMd15_CMd1	Student's T-test significant___	Peptides	Razor + unique peptides	Unique peptides	Sequence coverage [%]	Unique + razor sequence coverage [%]	Unique sequence coverage [%]	Mol. weight [kDa]	Q-value	Score	Intensity	MS/MS count	Student's T-test q-value CMd4_CMd1	Student's T-test Difference CMd4_CMd1	Student's T-test q-value CMd8_CMd4	Student's T-test Difference CMd8_CMd4	Student's T-test q-value CMd15_CMd8	Student's T-test Difference CMd15_CMd8	Student's T-test q-value CMd15_CMd1	Student's T-test Difference CMd15_CMd1	Protein IDs	Majority protein IDs	Protein names	Gene names
#!{Type}E	E	E	E	E	E	E	E	E	E	E	E	C	C	C	C	C	C	C	C	C	C	C	C	C	C	C	N	N	N	N	N	N	N	N	N	N	N	N	N	N	N	N	N	N	N	T	T	T	T
#!{C:CM/day}CMd1	CMd1	CMd1	CMd4	CMd4	CMd4	CMd8	CMd8	CMd8	CMd15	CMd15	CMd15
24.4512367248535	23.1559944152832	22.6221199035645	21.0363750457764	21.7849655151367	21.0020275115967	20.653247833252	19.7518901824951	20.1698665618896	NaN	20.2624702453613	19.7154197692871				0	cell part;cytoplasm;cytoplasmic membrane-bounded vesicle;cytosol;extracellular organelle;intracellular membrane-bounded organelle;intracellular non-membrane-bounded organelle;intracellular organelle;macromolecular complex;membrane;mitochondrion;organelle;plasma membrane;protein complex;vesicle	Bacterial invasion of epithelial cells;Endocrine and other factor-regulated calcium reabsorption;Endocytosis;Huntington's disease;Lysosome	Cluster -87							+	CMd15_CMd1	14	14	14	11,9	11,9	11,9	192,06	0	129,63	129410000	33	0,1656	-2,1353276570638	0,0547826086956522	-1,08278783162435	0,715826086956522	-0,202723185221355	0,00432	-3,4208386739095	A0A087WVQ6;Q00610;J3KS13;A0A087WX41;P53675;J3KRF5;K7EJJ5;J3KSQ2;F5H5N6	A0A087WVQ6;Q00610	Clathrin heavy chain;Clathrin heavy chain 1	CLTC
22.4157848358154	25.5781631469727	22.5140514373779	22.2501163482666	22.6505336761475	22.3418273925781	NaN	NaN	NaN	NaN	NaN	NaN				0	cell part;cytosol;extracellular organelle;intracellular membrane-bounded organelle;intracellular organelle;nucleus;organelle;vesicle	Amino sugar and nucleotide sugar metabolism;Galactose metabolism;Pentose and glucuronate interconversions;Starch and sucrose metabolism	Cluster -87									6	6	6	16,7	16,7	16,7	56,967	0	46,327	87911000	16	0,588512820512821	-1,08850733439128	1	NaN	1	NaN	1	NaN	A0A087WYS1;E7EUC7;Q16851;C9JVG3;C9JQU9;C9JNZ1;C9JWG0;C9JTZ5;C9JUW1	A0A087WYS1;E7EUC7;Q16851;C9JVG3;C9JQU9;C9JNZ1	UTP--glucose-1-phosphate uridylyltransferase	UGP2
21.6070232391357	22.5935688018799	NaN	NaN	NaN	21.8502597808838	NaN	NaN	NaN	NaN	NaN	NaN				0	cell part;cytoplasm;cytosol;extracellular organelle;intracellular membrane-bounded organelle;intracellular organelle;macromolecular complex;nucleoplasm;nucleus;organelle;proteasome complex;protein complex;vesicle	Proteasome	Cluster -87									2	2	2	11,2	11,2	11,2	25,041	0	12,976	50499000	3	0,998971428571429	-0,250036239624023	1	NaN	1	NaN	1	NaN	A0A087WYS6;O14818;Q8TAA3;H0Y586	A0A087WYS6;O14818;Q8TAA3;H0Y586	Proteasome subunit alpha type-7;Proteasome subunit alpha type-7-like	PSMA8;PSMA7
NaN	22.74831199646	22.1645660400391	25.7771587371826	24.6907253265381	24.1656875610352	26.2883281707764	26.1726837158203	25.5389575958252	25.0883293151855	25.3946018218994	24.9652118682861				0	cell part;extracellular matrix;extracellular organelle;extracellular region;macromolecular complex;membrane;organelle;plasma membrane;protein complex;vesicle	ECM-receptor interaction;Focal adhesion;Protein digestion and absorption	Cluster -86							+	CMd15_CMd1	10	10	10	13,4	13,4	13,4	108,34	0	96,348	383530000	59	0,164	2,42141819000244	0,0834117647058824	1,122132619222	0,0567058823529412	-0,850608825683594	0	2,69294198354085	A0A087X0S5;P12109	A0A087X0S5;P12109	Collagen alpha-1(VI) chain	COL6A1
22.2425479888916	22.1990451812744	23.4226512908936	21.6263599395752	22.4471797943115	22.8093318939209	21.0834922790527	21.5369205474854	21.9691619873047	20.6942157745361	21.2779293060303	21.0937786102295				0	cell part;cytoplasm;cytosol;extracellular organelle;intracellular membrane-bounded organelle;intracellular organelle;macromolecular complex;membrane;nucleus;organelle;plasma membrane;preribosome;ribonucleoprotein complex;small ribosomal subunit;vesicle	Ribosome	Cluster -87							+	CMd15_CMd1	5	5	5	26,2	26,2	26,2	29,404	0	33,775	96314000	17	0,863148936170213	-0,327124277750652	0,118926829268293	-0,764432271321613	0,219428571428571	-0,507883707682293	0,00415384615384615	-1,59944025675456	C9J9K3;A0A0C4DG17;P08865;F8WD59	C9J9K3;A0A0C4DG17;P08865;F8WD59	40S ribosomal protein SA	RPSA
NaN	NaN	NaN	NaN	NaN	22.4644088745117	22.3613185882568	22.5681114196777	NaN	NaN	NaN	NaN				0	cell part;extracellular organelle;extracellular region;extracellular space;membrane;organelle;plasma membrane;vesicle	Complement and coagulation cascades;Staphylococcus aureus infection	Cluster -88									2	2	2	4,6	4,6	4,6	65,769	0	13,622	35676000	6	0,984901408450704	NaN	1	0,000306129455566406	1	NaN	1	NaN	A0A0G2JH38;E7ETN3;B4E1Z4;P00751;H7C5H1	A0A0G2JH38;E7ETN3;B4E1Z4;P00751;H7C5H1	Complement factor B;Complement factor B Ba fragment;Complement factor B Bb fragment	CFB
22.6383209228516	21.8470134735107	23.928861618042	21.2775897979736	22.2624702453613	20.7399940490723	20.0247230529785	19.5633525848389	20.4430370330811	19.5680751800537	19.7183990478516	NaN				0	cell part;cytoplasm;cytoplasmic membrane-bounded vesicle;cytosol;extracellular organelle;Golgi apparatus;intracellular membrane-bounded organelle;intracellular organelle;membrane;mitochondrion;organelle;plasma membrane;vesicle	Fatty acid biosynthesis;Insulin signaling pathway	Cluster -87							+	CMd15_CMd1	8	8	8	5	5	5	273,2	0	54,745	94344000	28	0,288521739130435	-1,37804730733236	0,0569230769230769	-1,41631380716959	0,396108108108108	-0,367133776346844	0,00744827586206897	-3,1614948908488	A0A0U1RQF0;P49327	A0A0U1RQF0;P49327	Fatty acid synthase;[Acyl-carrier-protein] S-acetyltransferase;[Acyl-carrier-protein] S-malonyltransferase;3-oxoacyl-[acyl-carrier-protein] synthase;3-oxoacyl-[acyl-carrier-protein] reductase;3-hydroxyacyl-[acyl-carrier-protein] dehydratase;Enoyl-[acyl-carrier-protein] reductase;Oleoyl-[acyl-carrier-protein] hydrolase	FASN
22.3265209197998	25.3211345672607	25.4643211364746	25.3443508148193	22.4048099517822	21.3647956848145	22.3264122009277	21.6799430847168	21.464183807373	22.1080837249756	22.1499462127686	21.9622936248779				0	cell part;chromosome;extracellular organelle;intracellular membrane-bounded organelle;intracellular non-membrane-bounded organelle;intracellular organelle;macromolecular complex;nuclear chromosome;nucleoplasm;nucleosome;nucleus;organelle;vesicle	Systemic lupus erythematosus	Cluster -87							+	CMd15_CMd1	3	3	3	20,7	20,7	20,7	18,481	0	24,299	184080000	29	0,7312	-1,33267339070638	0,362538461538462	-1,21447245279948	0,464631578947368	0,249928156534832	0,0311764705882353	-2,29721768697103	A0A0U1RR32;A0A0U1RRH7;Q99878;Q96KK5;Q9BTM1;Q16777;Q93077;Q7L7L0;Q6FI13;P20671;P0C0S8;P04908;H0YFX9;C9J0D1;Q71UI9;P0C0S5;Q96QV6;P16104;C9J386;Q8IUE6	A0A0U1RR32;A0A0U1RRH7;Q99878;Q96KK5;Q9BTM1;Q16777;Q93077;Q7L7L0;Q6FI13;P20671;P0C0S8;P04908;H0YFX9;C9J0D1;Q71UI9;P0C0S5;Q96QV6;P16104	Histone H2A type 1-J;Histone H2A type 1-H;Histone H2A.J;Histone H2A type 2-C;Histone H2A type 1-C;Histone H2A type 3;Histone H2A type 2-A;Histone H2A type 1-D;Histone H2A type 1;Histone H2A type 1-B/E;Histone H2A;Histone H2A.V;Histone H2A.Z;Histone H2A type 1-A;Histone H2AX	HIST1H2AJ;HIST1H2AH;H2AFJ;HIST2H2AC;HIST1H2AC;HIST3H2A;HIST2H2AA3;HIST1H2AD;HIST1H2AG;HIST1H2AB;H2AFV;H2AFZ;HIST1H2AA;H2AFX
21.0953254699707	20.5459480285645	NaN	20.5561847686768	20.6427116394043	21.9244823455811	NaN	NaN	NaN	NaN	20.3451633453369	NaN				0	cell part;cell projection;cilium;cytoplasm;cytosol;extracellular matrix;extracellular organelle;intracellular membrane-bounded organelle;intracellular organelle;membrane;mitochondrion;nucleus;organelle;plasma membrane;vesicle	Carbon fixation in photosynthetic organisms;Glycolysis / Gluconeogenesis;Purine metabolism;Pyruvate metabolism;Type II diabetes mellitus	Cluster -87									5	5	5	15,1	15,1	15,1	49,897	0	32,906	32296000	6	0,994415094339623	0,220489501953125	0,986387096774194	NaN	0,991924528301887	NaN	1	-0,475473403930664	B4DNK4;P14618;H3BTN5;H3BQ34;H3BR70	B4DNK4;P14618;H3BTN5;H3BQ34;H3BR70	Pyruvate kinase;Pyruvate kinase PKM	PKM
23.8990135192871	25.3178272247314	24.988151550293	22.4267520904541	21.7506637573242	22.5556926727295	21.4041080474854	21.661491394043	21.7457084655762	20.3425617218018	NaN	20.3462448120117				0	cell part;cytoplasm;cytoplasmic membrane-bounded vesicle;cytosol;endosome;extracellular organelle;intracellular;intracellular membrane-bounded organelle;intracellular non-membrane-bounded organelle;intracellular organelle;macromolecular complex;membrane;midbody;nuclear pore;nucleocytoplasmic shuttling complex;nucleolus;nucleoplasm;nucleus;organelle;protein complex;vesicle	Ribosome biogenesis in eukaryotes;RNA transport	Cluster -87					+	CMd15_CMd8	+	CMd15_CMd1	5	5	5	33,3	33,3	33,3	22,436	0	89,257	193470000	22	0,1816	-2,49062792460124	0,071125	-0,640600204467773	0,0573333333333333	-1,25936603546143	0	-4,39059416453044	F5H018;B5MDF5;J3KQE5;P62826;B4DV51;H0YFC6	F5H018;B5MDF5;J3KQE5;P62826;B4DV51	GTP-binding nuclear protein Ran	RAN
23.7226524353027	23.4974098205566	23.8152866363525	22.8873271942139	23.7383041381836	22.3078308105469	21.9575901031494	21.9351348876953	23.5374183654785	21.6681308746338	22.6085357666016	21.6676540374756				0	cell part;cytosol;extracellular organelle;intracellular membrane-bounded organelle;intracellular organelle;macromolecular complex;nucleoplasm;nucleus;organelle;ribonucleoprotein complex;vesicle		Cluster -87							+	CMd15_CMd1	4	4	4	22,6	22,6	22,6	23,076	0	69,195	177530000	46	0,349538461538462	-0,700628916422527	0,524592592592593	-0,501106262207031	0,525853658536585	-0,495274225870766	0	-1,69700940450032	D6RAF8;Q14103;D6RF44;H0YA96;H0Y8G5;D6RD83;D6RBQ9;A0A087WUK2;O14979	D6RAF8;Q14103;D6RF44;H0YA96;H0Y8G5;D6RD83;D6RBQ9	Heterogeneous nuclear ribonucleoprotein D0	HNRNPD
20.6269397735596	20.3524017333984	NaN	21.3958187103271	NaN	23.3447570800781	20.6407718658447	20.9880828857422	NaN	NaN	NaN	NaN				0	cell part;cytoplasm;cytosol;extracellular organelle;organelle;vesicle	Nitrogen metabolism	Cluster -87									2	2	2	24,1	24,1	24,1	9,4069	0	15,713	52342000	30	0,353066666666667	1,88061714172363	0,198083333333333	-1,55586051940918	0,973555555555556	NaN	1	NaN	E5RJF6;E5RJI8;E5RH81;H0YBE2;E5RFE7;E5RHP7;P00915;E5RG81	E5RJF6;E5RJI8;E5RH81;H0YBE2;E5RFE7;E5RHP7;P00915;E5RG81	Carbonic anhydrase 1	CA1
23.3106346130371	21.9406299591064	22.1046962738037	22.3344268798828	22.3729724884033	23.6934928894043	20.2810478210449	20.1526412963867	NaN	19.3547916412354	19.6489200592041	19.6587657928467				0	apical part of cell;brush border;cell body;cell part;cell projection;cytoplasm;cytoskeleton;cytosol;extracellular organelle;extracellular space;filopodium;intracellular membrane-bounded organelle;intracellular non-membrane-bounded organelle;intracellular organelle;macromolecular complex;membrane;microvillus;nucleolus;nucleus;organelle;plasma membrane;protein complex;vesicle	Gastric acid secretion;Leukocyte transendothelial migration;Measles;Pathogenic Escherichia coli infection;Regulation of actin cytoskeleton	Cluster -87			+	CMd8_CMd4	+	CMd15_CMd8	+	CMd15_CMd1	6	6	6	9,7	9,7	9,7	69,371	0	52,143	96286000	21	0,883918367346939	0,348310470581055	0,02	-2,58345286051432	0,0373333333333333	-0,662685394287109	0	-2,89782778422038	E7EQR4;P15311;P26038;P35241;V9GZ54;E9PQ82;E9PNV3	E7EQR4;P15311;P26038;P35241	Ezrin;Moesin;Radixin	EZR;MSN;RDX
22.6736602783203	22.8990325927734	22.6955108642578	22.0074100494385	22.501594543457	NaN	NaN	NaN	NaN	NaN	NaN	NaN				0	cell part;cytoplasm;cytosol;extracellular organelle;intracellular membrane-bounded organelle;intracellular non-membrane-bounded organelle;intracellular organelle;macromolecular complex;membrane;nucleolus;nucleus;organelle;ribonucleoprotein complex;ribosome;small ribosomal subunit;vesicle	Ribosome	Cluster -87									4	4	4	21,6	21,6	21,6	25,371	0	26,535	61611000	11	0,271058823529412	-0,501565615336101	0,970730158730159	NaN	0,955854545454546	NaN	0,99095652173913	NaN	E9PL09;P23396;E9PPU1;H0YEU2;F2Z2S8;H0YF32;H0YCJ7;E9PQ96;E9PSF4;E9PJH4;E9PK82	E9PL09;P23396;E9PPU1;H0YEU2;F2Z2S8;H0YF32;H0YCJ7	40S ribosomal protein S3	RPS3
22.9498825073242	22.4471035003662	22.9205074310303	22.5093002319336	22.9829235076904	22.4959716796875	22.2933654785156	NaN	NaN	21.9379386901855	22.2829151153564	21.9271621704102				0	cell part;cytosol;extracellular organelle;intracellular membrane-bounded organelle;intracellular organelle;nucleus;organelle;vesicle		Cluster -87							+	CMd15_CMd1	4	4	4	5,1	5,1	5,1	102,99	0	24,108	115490000	8	0,9432	-0,109766006469727	0,9555625	-0,369366327921551	0,938785714285714	-0,24402681986491	0,00385714285714286	-0,723159154256187	E9PLK3;P55786;A6NEC2;H0YCQ5;E9PJ74;H0YDG0;E9PRQ5	E9PLK3;P55786;A6NEC2	Puromycin-sensitive aminopeptidase;Puromycin-sensitive aminopeptidase-like protein	NPEPPS;NPEPPSL1
21.5523433685303	21.5831604003906	21.4406051635742	23.2987995147705	23.645263671875	22.7791042327881	25.6943168640137	26.0580863952637	25.4770736694336	22.5484428405762	23.2183322906494	22.8948574066162				0	cell part;cell surface;cytoplasm;cytoplasmic membrane-bounded vesicle;extracellular matrix;extracellular region;extracellular space;intracellular membrane-bounded organelle;intracellular organelle;membrane;organelle;proteinaceous extracellular matrix;vesicle		Cluster -88			+	CMd8_CMd4	+	CMd15_CMd8	+	CMd15_CMd1	5	5	5	28,9	28,9	28,9	17,47	0	68,465	217630000	30	0,468	1,71568616231282	0,032	2,50210316975912	0	-2,85594813028971	0	1,36184120178223	F5GY03;P09486;E5RK62	F5GY03;P09486;E5RK62	SPARC	SPARC
18.4894237518311	17.7941112518311	18.3810195922852	17.8900032043457	17.7757778167725	NaN	NaN	NaN	NaN	NaN	NaN	NaN				0	cell part;cell surface;cytoplasm;cytoplasmic membrane-bounded vesicle;extracellular organelle;intracellular membrane-bounded organelle;intracellular organelle;membrane;nucleoplasm;nucleus;organelle;plasma membrane;vesicle	Protein digestion and absorption	Cluster -84									2	2	2	4,3	4,3	4,3	64,872	0	12,26	7355900	2	0,428228571428571	-0,388627688090008	0,940861538461538	NaN	0,922315789473684	NaN	0,969872340425532	NaN	F5GZS6;J3KPF3;P08195;H0YFX4;F5GZI0	F5GZS6;J3KPF3;P08195;H0YFX4;F5GZI0	4F2 cell-surface antigen heavy chain	SLC3A2
NaN	22.2242622375488	21.9863128662109	NaN	NaN	NaN	NaN	NaN	NaN	NaN	NaN	NaN				0	cell part;cytosol;extracellular organelle;intracellular membrane-bounded organelle;intracellular organelle;membrane;mitochondrion;organelle;vesicle	One carbon pool by folate	Cluster -87									4	4	4	4,5	4,5	4,5	110,61	0	32,389	20389000	5	0,971222222222222	NaN	0,926606060606061	NaN	0,906413793103448	NaN	0,949666666666667	NaN	F5H2F4;P11586;V9GYY3	F5H2F4;P11586	C-1-tetrahydrofolate synthase, cytoplasmic;Methylenetetrahydrofolate dehydrogenase;Methenyltetrahydrofolate cyclohydrolase;Formyltetrahydrofolate synthetase;C-1-tetrahydrofolate synthase, cytoplasmic, N-terminally processed	MTHFD1
23.933910369873	23.2616958618164	21.7758731842041	22.4675712585449	22.4394130706787	24.7491397857666	20.7521362304688	21.2374229431152	21.0016136169434	20.9728107452393	NaN	20.1879749298096				0	cell part;cytoplasm;cytosol;endosome;extracellular organelle;extracellular region;intracellular membrane-bounded organelle;intracellular organelle;macromolecular complex;nucleus;organelle;protein complex;vesicle	Gap junction;Pathogenic Escherichia coli infection;Phagosome	Cluster -87							+	CMd15_CMd1	10	10	5	24,3	24,3	13,5	57,73	0	75,236	245730000	43	0,969733333333333	0,228214899698894	0,0592	-2,22165044148763	0,352888888888889	-0,416664759318035	0,0197575757575758	-2,41010030110677	F5H5D3;Q9BQE3;Q71U36;P68363;A0A1W2PQM2;Q13748;Q6PEY2;F8VVB9;C9J2C0;P68366;V9GZ17;F8VRZ4;F8VS66;F8VQQ4;F8VRK0;F8VX09;F8VWV9;C9JDS9;A6NHL2;F8VXZ7;F8W0F6;Q9H853	F5H5D3;Q9BQE3;Q71U36;P68363;A0A1W2PQM2;Q13748;Q6PEY2;F8VVB9;C9J2C0;P68366	Tubulin alpha-1C chain;Tubulin alpha-1A chain;Tubulin alpha-1B chain;Tubulin alpha-3C/D chain;Tubulin alpha-3E chain;Tubulin alpha-4A chain	TUBA1C;TUBA1A;TUBA1B;TUBA3C;TUBA3E;TUBA8;TUBA4A
23.6727123260498	23.5723056793213	22.2982959747314	21.1749324798584	22.0246887207031	21.898551940918	21.0851154327393	20.810567855835	21.0911979675293	NaN	20.5108451843262	NaN				0	cell part;cytoplasm;cytoskeleton;extracellular organelle;intracellular non-membrane-bounded organelle;intracellular organelle;macromolecular complex;membrane;nucleoplasm;organelle;ribonucleoprotein complex;spliceosomal complex;vesicle	Spliceosome	Cluster -87									5	5	5	42,1	42,1	42,1	16,536	0	32,315	153690000	19	0,196	-1,48171361287435	0,0548387096774193	-0,703763961791992	0,891050847457627	-0,484781901041668	0,930285714285714	-2,67025947570801	F8VTQ5;F8W6I7;P09651;F8VZ49;Q32P51;F8VYN5;F8W646;H0YH80	F8VTQ5;F8W6I7;P09651;F8VZ49;Q32P51	Heterogeneous nuclear ribonucleoprotein A1;Heterogeneous nuclear ribonucleoprotein A1, N-terminally processed;Heterogeneous nuclear ribonucleoprotein A1-like 2	HNRNPA1;HNRNPA1L2
21.0460681915283	21.6786975860596	21.4005680084229	NaN	21.2321014404297	22.2063674926758	20.8818874359131	20.9479942321777	20.8971862792969	20.4849281311035	NaN	NaN				0	cell part;cytoplasm;cytosol;extracellular organelle;intracellular membrane-bounded organelle;intracellular non-membrane-bounded organelle;intracellular organelle;macromolecular complex;membrane;nucleus;organelle;ribonucleoprotein complex;ribosome;vesicle	Ribosome	Cluster -87									4	4	4	17,8	17,8	17,8	27,187	0	28,001	49120000	13	0,739454545454545	0,344123204549152	0,0997714285714286	-0,810211817423504	0,8762	-0,424094518025715	0,91168	-0,890183130900066	F8VU65;P05388;F8VPE8;G3V210;F8VW21;F8VWS0;Q8NHW5;F8VS58;F8VQY6;F8VRK7;F8VZS0;F8VWV4	F8VU65;P05388;F8VPE8;G3V210;F8VW21;F8VWS0;Q8NHW5;F8VS58;F8VQY6;F8VRK7;F8VZS0	60S acidic ribosomal protein P0;60S acidic ribosomal protein P0-like	RPLP0;RPLP0P6
NaN	22.2937297821045	23.3181037902832	22.6728420257568	23.5577735900879	21.783088684082	NaN	NaN	NaN	NaN	NaN	NaN				0	cell body;cell part;cell projection;cytoplasm;cytoskeleton;cytosol;extracellular organelle;intracellular membrane-bounded organelle;intracellular non-membrane-bounded organelle;intracellular organelle;macromolecular complex;midbody;mitochondrion;neuron projection;neuronal cell body;nucleus;organelle;ribonucleoprotein complex;small ribosomal subunit;vesicle	Measles	Cluster -87									3	3	3	19,7	19,7	19,7	21,934	0	22,513	55952000	10	0,968126984126984	-0,134682019551594	0,912776119402985	NaN	0,86183606557377	NaN	0,893803921568627	NaN	H0YAF8;J3KPE3;H0Y8W2;P63244;D6RAU2;E9PD14;D6RFX4;D6RFZ9;D6RHH4;D6R9Z1;H0YAM7;D6R9L0;H0Y9P0;D6RF23;D6RAC2;D6REE5	H0YAF8;J3KPE3;H0Y8W2;P63244;D6RAU2;E9PD14;D6RFX4;D6RFZ9;D6RHH4;D6R9Z1;H0YAM7;D6R9L0	Guanine nucleotide-binding protein subunit beta-2-like 1;Guanine nucleotide-binding protein subunit beta-2-like 1, N-terminally processed	GNB2L1
NaN	20.9587230682373	20.9841232299805	21.4618396759033	21.6475944519043	20.9106426239014	21.733678817749	21.7779216766357	NaN	NaN	NaN	NaN				0	cell part;cytoplasm;cytoplasmic membrane-bounded vesicle;cytosol;endoplasmic reticulum;extracellular matrix;extracellular organelle;extracellular region;extracellular space;Golgi apparatus;intracellular membrane-bounded organelle;intracellular organelle;macromolecular complex;membrane;mitochondrion;nucleus;organelle;vesicle		Cluster -87									2	2	2	12,3	12,3	12,3	33,419	0	13,353	29324000	15	0,455894736842105	0,368602434794109	0,188851063829787	0,415774663289387	0,847935483870968	NaN	0,876615384615385	NaN	H0YC35;P10909;H0YAS8;E7ERK6;H0YLK8	H0YC35;P10909;H0YAS8;E7ERK6;H0YLK8	Clusterin;Clusterin;Clusterin beta chain;Clusterin alpha chain	CLU
NaN	19.4018707275391	NaN	19.5284843444824	NaN	20.2389965057373	NaN	NaN	19.487756729126	NaN	NaN	NaN				0	cell part;cell surface;extracellular organelle;intracellular membrane-bounded organelle;intracellular non-membrane-bounded organelle;intracellular organelle;macromolecular complex;membrane;mitochondrion;nucleus;organelle;plasma membrane;protein complex;proton-transporting two-sector ATPase complex;vesicle	Alzheimer's disease;Huntington's disease;Oxidative phosphorylation;Parkinson's disease	Cluster -88									4	4	4	15,2	15,2	15,2	38,138	0	23,511	21381000	4	0,957917808219178	0,481869697570801	0,899352941176471	-0,395983695983887	0,83447619047619	NaN	0,860075471698113	NaN	H0YH81;P06576;F8W079;F8W0P7;H0YI37	H0YH81;P06576;F8W079;F8W0P7	ATP synthase subunit beta;ATP synthase subunit beta, mitochondrial	ATP5B
NaN	NaN	NaN	NaN	NaN	NaN	21.3596038818359	21.4898357391357	21.2917079925537	23.7027149200439	22.4654064178467	23.4122219085693				0	cell part;extracellular matrix;extracellular organelle;extracellular region;extracellular space;organelle;vesicle	Protein digestion and absorption	Cluster -84					+	CMd15_CMd8			2	2	2	6,4	6,4	6,4	70,733	0	15,763	20049000	11	0,944972972972973	NaN	0,88631884057971	NaN	0,0376666666666667	1,81306521097819	0,844148148148148	NaN	H7BXV5;P39060;H7C457	H7BXV5;P39060;H7C457	Collagen alpha-1(XVIII) chain;Endostatin	COL18A1
19.4463729858398	19.9674739837646	20.3298091888428	21.4879245758057	21.3271789550781	NaN	23.0766429901123	23.1199703216553	21.4045238494873	20.898811340332	NaN	20.5207576751709				0	cell part;endoplasmic reticulum;extracellular matrix;extracellular organelle;extracellular space;intracellular membrane-bounded organelle;intracellular organelle;organelle;proteinaceous extracellular matrix;vesicle		Cluster -88							+	CMd15_CMd1	2	2	2	2,8	2,8	2,8	79,755	0	17,144	34944000	20	0,161333333333333	1,49299971262614	0,171130434782609	1,12616062164307	0,103090909090909	-1,8239278793335	0,0482285714285714	0,795232454935711	H7C1W1;Q92626	H7C1W1;Q92626	Peroxidasin homolog	PXDN
NaN	NaN	NaN	NaN	NaN	NaN	NaN	NaN	NaN	NaN	21.8398818969727	23.2042942047119				0	cell part;cytoplasm;extracellular space		Cluster -84									5	2	2	8,7	3,2	3,2	70,449	0	12,638	9206100	6	0,932373333333333	NaN	0,873657142857143	NaN	0,8214375	NaN	0,8288	NaN	J3KMX3;P02771	J3KMX3;P02771	Alpha-fetoprotein	AFP
26.2152500152588	26.6738433837891	26.1627902984619	24.9070148468018	26.7283229827881	26.139949798584	23.7486801147461	24.1221046447754	24.8296794891357	24.1679077148438	24.7196273803711	24.5636615753174				0	cell part;cytoskeleton;cytosol;extracellular organelle;extracellular region;extracellular space;intracellular membrane-bounded organelle;intracellular non-membrane-bounded organelle;intracellular organelle;membrane;nucleus;organelle;vesicle	Carbon fixation in photosynthetic organisms;Fructose and mannose metabolism;Glycolysis / Gluconeogenesis;Pentose phosphate pathway	Cluster -87							+	CMd15_CMd1	14	14	13	45,7	45,7	43,8	39,817	0	121,45	942230000	86	0,714695652173913	-0,42553202311198	0,0572857142857143	-1,6916077931722	0,594232558139535	0,250244140625	0	-1,86689567565918	J3KPS3;P04075;H3BQN4;H3BPS8;H3BUH7;H3BR04;H3BMQ8;H3BU78;H3BR68;A0A087WXX2;P05062	J3KPS3;P04075;H3BQN4;H3BPS8;H3BUH7;H3BR04;H3BMQ8	Fructose-bisphosphate aldolase;Fructose-bisphosphate aldolase A	ALDOA
21.8947105407715	23.1332015991211	22.5978260040283	22.0871562957764	23.8042011260986	22.2252635955811	NaN	21.4380683898926	21.5724201202393	NaN	NaN	21.1486759185791				0	cell part;cytosol;extracellular organelle;intracellular membrane-bounded organelle;intracellular organelle;nucleus;organelle;vesicle	Glutathione metabolism;Pentose phosphate pathway	Cluster -87									4	4	4	36,2	36,2	36,2	17,293	0	33,151	64578000	10	1	0,163627624511719	0,151818181818182	-1,2002960840861	0,8088	-0,356568336486816	0,814	-1,3932367960612	K7EMN2;K7EM49;P52209;K7EPF6	K7EMN2;K7EM49;P52209;K7EPF6	6-phosphogluconate dehydrogenase, decarboxylating	PGD
19.7897891998291	19.5907440185547	19.5190486907959	NaN	NaN	NaN	NaN	NaN	NaN	NaN	NaN	NaN				0	cell part;cytosol;extracellular organelle;intracellular non-membrane-bounded organelle;intracellular organelle;macromolecular complex;membrane;organelle;ribonucleoprotein complex;ribosome;small ribosomal subunit;vesicle	Ribosome	Cluster -87									2	2	2	34	34	34	5,5575	0	12,06	16563000	8	0,920105263157895	NaN	0,861352112676056	NaN	0,796545454545455	NaN	0,799719298245614	NaN	M0QX76;M0R1M5;M0R3H0;M0R210;Q6IPX4;P62249	M0QX76;M0R1M5;M0R3H0;M0R210;Q6IPX4;P62249	40S ribosomal protein S16	RPS16
NaN	19.8008403778076	21.4410610198975	26.0760631561279	26.3211688995361	26.6588077545166	24.0576324462891	23.9868507385254	23.3924427032471	NaN	NaN	NaN				0	cell part;extracellular matrix;extracellular region;extracellular space	TGF-beta signaling pathway	Cluster -88			+	CMd8_CMd4					8	8	8	29,2	29,2	29,2	40,92	0	62,709	278350000	50	0,282	5,73106257120768	0,048	-2,53970464070638	0,78465671641791	NaN	0,785931034482759	NaN	O00292;O75610;A0A087WW09	O00292;O75610	Left-right determination factor 2;Left-right determination factor 1	LEFTY2;LEFTY1
23.7086200714111	24.2717037200928	24.4510478973389	23.1848468780518	23.9320201873779	23.8396129608154	21.5154724121094	21.7584533691406	21.936429977417	20.6947250366211	21.3984832763672	21.1120986938477				0	cell part;cell projection;cytoplasm;cytoskeleton;extracellular organelle;extracellular region;extracellular space;intracellular membrane-bounded organelle;intracellular non-membrane-bounded organelle;intracellular organelle;macromolecular complex;neuron projection;nucleus;organelle;protein complex;pseudopodium;ribonucleoprotein complex;vesicle	Adherens junction;Amoebiasis;Arrhythmogenic right ventricular cardiomyopathy (ARVC);Focal adhesion;Leukocyte transendothelial migration;Regulation of actin cytoskeleton;Systemic lupus erythematosus;Tight junction	Cluster -87			+	CMd8_CMd4			+	CMd15_CMd1	8	8	3	11,7	11,7	5,4	104,85	0	103,19	211760000	46	0,346666666666667	-0,491630554199219	0,024	-1,91537475585938	0,0930526315789474	-0,668349583943684	0	-3,07535489400228	O43707;H7C144;F5GXS2	O43707;H7C144;F5GXS2	Alpha-actinin-4	ACTN4
NaN	24.1106014251709	24.0065021514893	25.5975303649902	23.052417755127	NaN	22.3932018280029	22.5547332763672	NaN	NaN	22.1804981231689	NaN				0	cell part;extracellular organelle;extracellular space;intracellular membrane-bounded organelle;intracellular organelle;macromolecular complex;nucleoplasm;nucleosome;nucleus;organelle;vesicle	Systemic lupus erythematosus	Cluster -87									2	2	2	15,1	15,1	15,1	18,804	0	106,27	102590000	25	0,972451612903226	0,266422271728516	0,220235294117647	-1,85100650787354	0,773117647058824	-0,293469429016113	0,772610169491525	-1,87805366516113	U3KQK0;Q99880;Q99879;Q99877;Q93079;Q5QNW6;P62807;P58876;P57053;O60814;Q8N257;Q16778;P33778;P23527;P06899	U3KQK0;Q99880;Q99879;Q99877;Q93079;Q5QNW6;P62807;P58876;P57053;O60814;Q8N257;Q16778;P33778;P23527;P06899	Histone H2B;Histone H2B type 1-L;Histone H2B type 1-M;Histone H2B type 1-N;Histone H2B type 1-H;Histone H2B type 2-F;Histone H2B type 1-C/E/F/G/I;Histone H2B type 1-D;Histone H2B type F-S;Histone H2B type 1-K;Histone H2B type 3-B;Histone H2B type 2-E;Histone H2B type 1-B;Histone H2B type 1-O;Histone H2B type 1-J	HIST1H2BN;HIST1H2BL;HIST1H2BM;HIST1H2BH;HIST2H2BF;HIST1H2BC;HIST1H2BD;H2BFS;HIST1H2BK;HIST3H2BB;HIST2H2BE;HIST1H2BB;HIST1H2BO;HIST1H2BJ
24.9750442504883	25.8465404510498	25.9392127990723	23.8303565979004	25.3946342468262	24.7002296447754	22.3879814147949	22.3933067321777	24.3467864990234	22.0043258666992	22.478796005249	21.875602722168				0	cell part;cytoplasm;cytosol;extracellular organelle;intracellular membrane-bounded organelle;intracellular organelle;microbody;mitochondrion;organelle;peroxisome;vesicle	Carbon fixation pathways in prokaryotes;Citrate cycle (TCA cycle);Glutathione metabolism;Peroxisome	Cluster -87							+	CMd15_CMd1	8	8	8	22,9	22,9	22,9	46,659	0	67,296	354860000	48	0,334333333333333	-0,945192337036133	0,0943783783783784	-1,59904861450195	0,288484848484849	-0,923116683959961	0	-3,46735763549805	O75874;C9J4N6;C9JJE5;C9JLU6;P48735	O75874;C9J4N6	Isocitrate dehydrogenase [NADP] cytoplasmic	IDH1
NaN	NaN	21.105655670166	22.3856391906738	22.1684894561768	21.5103626251221	23.1634006500244	23.4854202270508	21.9786529541016	21.9930686950684	22.0879001617432	22.0652961730957				0	cell part;cell projection;extracellular organelle;intracellular membrane-bounded organelle;intracellular organelle;membrane;nucleus;organelle;vesicle		Cluster -86									4	4	4	6,3	6,3	6,3	88,039	0	30,086	54120000	15	0,908155844155844	0,915841420491535	0,149953488372093	0,854327519734703	0,175703703703704	-0,827069600423179	0,759733333333333	0,943099339803059	Q5SR54;O94985	Q5SR54;O94985	Calsyntenin-1;Soluble Alc-alpha;CTF1-alpha	CLSTN1
NaN	23.4791412353516	23.4975318908691	24.2915115356445	24.3933582305908	27.7163333892822	22.1001472473145	NaN	22.9986057281494	NaN	NaN	NaN				0	extracellular region;extracellular space	Wnt signaling pathway	Cluster -87									6	6	6	42,3	42,3	42,3	30,083	0	50,1	297050000	21	0,426777777777778	1,97873115539551	0,1192	-2,91769123077393	0,761913043478261	NaN	0,74727868852459	NaN	O95813	O95813	Cerberus	CER1
25.6595153808594	25.7622299194336	25.7446308135986	25.5417366027832	26.260009765625	25.8483085632324	24.479944229126	24.4889793395996	25.8478546142578	25.0528736114502	25.0047035217285	24.3332672119141				0	cell part;cytosol;extracellular organelle;intracellular membrane-bounded organelle;intracellular organelle;membrane;mitochondrion;nucleus;organelle;vesicle	Cysteine and methionine metabolism;Glycolysis / Gluconeogenesis;Propanoate metabolism;Pyruvate metabolism	Cluster -87							+	CMd15_CMd1	10	9	9	31,3	27,7	27,7	36,688	0	97,094	674670000	90	0,725777777777778	0,161226272583008	0,105846153846154	-0,944425582885742	0,841714285714286	-0,141977945963539	0,0045	-0,925177256266274	P00338;F5GYU2;F5GXY2;F5GXH2;F5H5J4;F5H6W8;F5GZQ4;F5H8H6;F5GXC7;F5GWW2;F5GXU1	P00338;F5GYU2;F5GXY2;F5GXH2	L-lactate dehydrogenase A chain	LDHA
NaN	NaN	NaN	NaN	NaN	NaN	24.5768089294434	24.5733451843262	23.2166004180908	23.730447769165	23.3214111328125	23.4230365753174				0	cell part;extracellular matrix;extracellular region;extracellular space	Amoebiasis;ECM-receptor interaction;Focal adhesion;Protein digestion and absorption	Cluster -86									3	3	3	2,6	2,6	2,6	141,78	0	28,154	81051000	8	0,896512820512821	NaN	0,849388888888889	NaN	0,28	-0,630619684855144	0,735225806451613	NaN	P02458	P02458	Collagen alpha-1(II) chain;Collagen alpha-1(II) chain;Chondrocalcin	COL2A1
23.2967014312744	24.6783103942871	24.1540641784668	26.9689502716064	26.7992172241211	26.0243053436279	27.8479251861572	27.6634979248047	28.0119590759277	27.0752067565918	26.5683670043945	26.8034114837646				0	cell body;cell part;cell projection;cytoplasm;endoplasmic reticulum;endosome;extracellular matrix;extracellular organelle;extracellular region;extracellular space;Golgi apparatus;intracellular membrane-bounded organelle;intracellular organelle;lysosome;macromolecular complex;membrane;neuron projection;neuronal cell body;nuclear envelope;nucleus;organelle;plasma membrane;protein complex;vacuole;ve…	Alzheimer's disease	Cluster -86			+	CMd8_CMd4	+	CMd15_CMd8	+	CMd15_CMd1	14	14	14	49,2	49,2	49,2	36,154	0	323,31	1432800000	212	0,196	2,55446561177572	0,0230769230769231	1,24363644917806	0,043	-1,02546564737956	0	2,77263641357422	P02649;H0Y7L5;E9PEV4;E7ERP7;CON__Q03247	P02649;H0Y7L5	Apolipoprotein E	APOE
25.0991268157959	26.3637771606445	25.3623561859131	29.2285079956055	29.0598468780518	27.5175075531006	30.1302585601807	30.0432262420654	30.0867671966553	30.004638671875	29.3553771972656	29.5929718017578				0	cell part;extracellular matrix;extracellular organelle;extracellular region;extracellular space;intracellular membrane-bounded organelle;intracellular organelle;macromolecular complex;organelle;protein complex;vesicle	Amoebiasis;Bacterial invasion of epithelial cells;ECM-receptor interaction;Focal adhesion;Pathways in cancer;Regulation of actin cytoskeleton;Small cell lung cancer	Cluster -86							+	CMd15_CMd1	50	50	50	33,9	33,9	33,9	262,62	0	323,31	6285800000	759	0,18	2,99353408813477	0,0594074074074074	1,48479652404785	0,108	-0,435754776000977	0	4,04257583618164	P02751;H0Y7Z1;H0Y4K8	P02751;H0Y7Z1	Fibronectin;Anastellin;Ugl-Y1;Ugl-Y2;Ugl-Y3	FN1
NaN	22.3422889709473	21.4548797607422	NaN	NaN	NaN	19.5241279602051	20.0758762359619	NaN	21.1625099182129	21.2889518737793	23.7106189727783				0	cell body;cell part;cytoplasm;cytoskeleton;cytosol;endosome;extracellular organelle;extracellular region;extracellular space;Golgi apparatus;intracellular membrane-bounded organelle;intracellular non-membrane-bounded organelle;intracellular organelle;macromolecular complex;membrane;neuronal cell body;organelle;plasma membrane;vesicle	Fat digestion and absorption;Vitamin digestion and absorption	Cluster -84									10	10	8	2,7	2,7	2,1	515,6	0	62,813	20093000	23	0,885164556962025	NaN	0,837753424657534	NaN	0,159076923076923	2,25402482350667	1	0,155442555745442	P04114;A8MUN2	P04114	Apolipoprotein B-100;Apolipoprotein B-48	APOB
NaN	20.8567333221436	NaN	21.1435775756836	20.8409957885742	20.9399127960205	24.2690658569336	20.9939670562744	NaN	NaN	NaN	NaN				0	cell part;cytoskeleton;cytosol;extracellular organelle;extracellular region;extracellular space;intracellular membrane-bounded organelle;intracellular non-membrane-bounded organelle;intracellular organelle;membrane;nucleus;organelle;plasma membrane;vesicle		Cluster -88									6	6	6	52,7	52,7	52,7	10,834	0	40,855	525890000	15	0,8741	0,118095397949219	0,20448	1,65668773651123	0,751028571428571	NaN	0,723555555555556	NaN	P05109	P05109	Protein S100-A8;Protein S100-A8, N-terminally processed	S100A8
NaN	25.0441017150879	25.6408309936523	24.5048828125	23.8947658538818	NaN	NaN	NaN	NaN	NaN	NaN	NaN				0	cell part;cytoplasm;cytosol;extracellular organelle;extracellular space;organelle;vesicle	PPAR signaling pathway	Cluster -87									2	2	2	15,7	15,7	15,7	10,17	0	45,147	101860000	12	0,2904	-1,1426420211792	0,826432432432432	NaN	0,740450704225352	NaN	0,71225	NaN	S4R3A2;S4R371;P05413	S4R3A2;S4R371;P05413	Fatty acid-binding protein, heart	FABP3
NaN	NaN	NaN	NaN	NaN	NaN	20.7154026031494	20.8962993621826	NaN	22.0767574310303	21.6039943695068	24.6034278869629				0	cell part;cytosol;endosome;extracellular organelle;extracellular region;extracellular space;intracellular membrane-bounded organelle;intracellular organelle;macromolecular complex;organelle;vesicle		Cluster -84									5	5	4	15,9	15,9	12,9	45,398	0	48,1	26690000	11	0,863308641975309	NaN	0,815413333333333	NaN	0,234838709677419	1,95554224650065	0,701292307692308	NaN	P06727	P06727	Apolipoprotein A-IV	APOA4
NaN	20.3715648651123	NaN	24.4620761871338	25.4408531188965	23.9765739440918	23.0192184448242	22.3996829986572	24.0193710327148	20.7177467346191	20.9855842590332	20.7931270599365				0	cell part;cytoplasmic membrane-bounded vesicle;cytosol;extracellular matrix;extracellular region;extracellular space;intracellular membrane-bounded organelle;intracellular organelle;organelle;synapse;vesicle		Cluster -88					+	CMd15_CMd8			8	8	8	24,9	24,9	24,9	44,002	0	59,756	98168000	32	0,852780487804878	4,25493621826172	0,0727272727272727	-1,48041025797526	0,0410909090909091	-2,31393814086914	0,690666666666667	0,460587819417317	P07093;C9JN98	P07093;C9JN98	Glia-derived nexin	SERPINE2
26.4607486724854	26.9975509643555	26.7099094390869	26.8026733398438	27.2606925964355	26.340145111084	24.9140148162842	25.2586803436279	25.9862442016602	24.7944660186768	24.8997058868408	24.0759410858154				0	cell part;cytoplasm;cytosol;extracellular organelle;intracellular membrane-bounded organelle;intracellular organelle;membrane;mitochondrion;organelle;vesicle	Cysteine and methionine metabolism;Glycolysis / Gluconeogenesis;Propanoate metabolism;Pyruvate metabolism	Cluster -87			+	CMd8_CMd4			+	CMd15_CMd1	12	12	11	39,5	39,5	35,9	36,638	0	161,58	1447800000	163	1	0,0784339904785156	0,0255	-1,414857228597	0,15664	-0,796275456746422	0	-2,13269869486491	P07195;A8MW50;C9J7H8;F5H793;F5H5G7;F5H155;G3XAP5;F5H245;P07864	P07195;A8MW50;C9J7H8	L-lactate dehydrogenase B chain;L-lactate dehydrogenase	LDHB
22.4048099517822	24.9166126251221	22.9703559875488	23.9693031311035	22.3253135681152	24.0492630004883	20.6535091400146	20.8339900970459	20.3515396118164	NaN	NaN	20.5434970855713				0	cell body;cell part;cell projection;cilium;cytoplasm;cytoskeleton;cytosol;extracellular organelle;intracellular membrane-bounded organelle;intracellular non-membrane-bounded organelle;intracellular organelle;macromolecular complex;neuron projection;neuronal cell body;nucleus;organelle;protein complex;vesicle	Gap junction;Pathogenic Escherichia coli infection;Phagosome	Cluster -87			+	CMd8_CMd4					12	12	2	39,2	39,2	6,3	47,766	0	115,89	236220000	68	0,997217391304348	0,0173670450846366	0,0255	-2,83494695027669	0,730166666666667	-0,0695158640543632	0,680358208955224	-2,88709576924642	Q5JP53;P07437;Q5ST81;P04350;A0A0B4J269;Q13509;K7ESM5;Q9BUF5;G3V2A3;A0A075B736;Q5SQY0;Q3ZCM7;A6NNZ2;M0R1I1;G3V5W4;M0QY85;G3V2R8;M0R042;G3V3R4;M0R2D3;M0QZL7;M0QYM7;G3V2N6;M0R278;CON__ENSEMBL:ENSBTAP00000025008;Q9H4B7	Q5JP53;P07437;Q5ST81;P04350;A0A0B4J269;Q13509	Tubulin beta chain;Tubulin beta-4A chain;Tubulin beta-3 chain	TUBB;TUBB4A;TUBB3
25.7893009185791	20.1639842987061	19.7170429229736	20.2828578948975	20.1602954864502	20.6480770111084	19.5994873046875	NaN	NaN	NaN	NaN	NaN				0	cell cortex;cell part;cell projection;cytoplasm;cytoskeleton;cytosol;extracellular organelle;intracellular membrane-bounded organelle;intracellular non-membrane-bounded organelle;intracellular organelle;membrane;neuron projection;nucleus;organelle;synapse;vesicle	Regulation of actin cytoskeleton;Shigellosis	Cluster -87									6	6	6	55,7	55,7	55,7	15,054	0	55,248	273700000	19	0,751162790697674	-1,52636591593424	0,804684210526316	-0,764256159464519	0,720164383561644	NaN	0,670352941176471	NaN	P07737;K7EJ44;I3L3D5;CON__P02584	P07737;K7EJ44;I3L3D5	Profilin-1	PFN1
26.0116291046143	26.8791179656982	24.2957210540771	25.1381340026855	26.068826675415	25.2835502624512	23.7790641784668	23.5987796783447	24.192497253418	23.05690574646	22.9377956390381	21.7880363464355				0	cell body;cell part;cell projection;cell surface;cytoplasm;cytoplasmic membrane-bounded vesicle;cytosol;extracellular matrix;extracellular organelle;extracellular region;intracellular membrane-bounded organelle;intracellular organelle;macromolecular complex;membrane;mitochondrion;neuron projection;neuronal cell body;nucleoplasm;nucleus;organelle;plasma membrane;protein complex;vesicle	Antigen processing and presentation;NOD-like receptor signaling pathway;Pathways in cancer;Plant-pathogen interaction;Progesterone-mediated oocyte maturation;Prostate cancer;Protein processing in endoplasmic reticulum	Cluster -87			+	CMd8_CMd4			+	CMd15_CMd1	23	12	12	35,7	19,1	19,1	84,659	0	300,54	814500000	106	1	-0,231985727945965	0,0204	-1,64005661010742	0,0797777777777778	-1,26253445943197	0,004	-3,13457679748535	P07900;G3V2J8;Q14568;Q58FF6;Q58FG0;Q58FG1	P07900	Heat shock protein HSP 90-alpha	HSP90AA1
28.4418983459473	28.7311096191406	26.4696884155273	26.8780651092529	27.9960422515869	27.7736682891846	25.7788887023926	25.8640308380127	26.2200374603271	24.6922149658203	24.916431427002	23.9237937927246				0	cell part;cytoplasm;cytoplasmic membrane-bounded vesicle;cytosol;extracellular organelle;intracellular membrane-bounded organelle;intracellular organelle;membrane;mitochondrion;nucleoplasm;organelle;vesicle	Antigen processing and presentation;NOD-like receptor signaling pathway;Pathways in cancer;Plant-pathogen interaction;Progesterone-mediated oocyte maturation;Prostate cancer;Protein processing in endoplasmic reticulum	Cluster -87			+	CMd8_CMd4	+	CMd15_CMd8	+	CMd15_CMd1	29	29	13	43,8	43,8	21,4	83,263	0	323,31	4426400000	282	0,970196078431373	-0,331640243530273	0,025	-1,594939549764	0,0430769230769231	-1,44350560506185	0,00469565217391304	-3,37008539835612	P08238;Q58FF7;F8W026;Q96GW1;A0A1W2PRR1	P08238	Heat shock protein HSP 90-beta	HSP90AB1
20.3540172576904	21.4922828674316	20.5381050109863	21.8157749176025	20.8686866760254	22.2047863006592	19.3296775817871	19.8918876647949	20.4363422393799	NaN	20.034158706665	NaN				0	cell part;cytoplasm;extracellular organelle;intracellular;membrane;organelle;vesicle		Cluster -87			+	CMd8_CMd4					5	5	5	17,8	17,8	17,8	35,936	0	31,987	30504000	13	0,339310344827586	0,83494758605957	0,024	-1,7437801361084	0,710432432432432	0,148189544677734	0,66063768115942	-0,760643005371094	P08758;D6RBL5;D6RBE9;E9PHT9	P08758;D6RBL5;D6RBE9	Annexin A5;Annexin	ANXA5
24.3667297363281	24.26806640625	24.4455013275146	23.1419582366943	24.0932140350342	25.9638671875	24.4758071899414	24.2393608093262	24.7368602752686	23.6226558685303	23.5332641601563	23.3078594207764				0	cell part;cytoplasm;cytosol;extracellular organelle;extracellular space;intracellular;intracellular membrane-bounded organelle;intracellular organelle;macromolecular complex;membrane;mitochondrion;nucleus;organelle;plasma membrane;protein complex;vesicle	Drug metabolism - cytochrome P450;Glutathione metabolism;Metabolism of xenobiotics by cytochrome P450	Cluster -88					+	CMd15_CMd8	+	CMd15_CMd1	6	6	6	43,3	43,3	43,3	23,356	0	323,31	438400000	63	1	0,0395806630452498	1	0,0843296051025391	0,0491428571428571	-0,996082941691082	0	-0,872172673543293	P09211;A8MX94;A0A087X243;A0A087X2E9	P09211;A8MX94	Glutathione S-transferase P	GSTP1
22.2087802886963	23.0255336761475	21.3238868713379	20.8312091827393	21.6527652740479	NaN	20.2529201507568	20.2951316833496	21.1583232879639	NaN	21.30446434021	20.6720218658447				0	cell part;cell projection;cytoskeleton;cytosol;extracellular organelle;intracellular membrane-bounded organelle;intracellular non-membrane-bounded organelle;intracellular organelle;mitochondrion;neuron projection;organelle;vesicle	Carbon fixation in photosynthetic organisms;Fructose and mannose metabolism;Glycolysis / Gluconeogenesis;Pentose phosphate pathway	Cluster -87									3	2	2	12,6	10,7	10,7	39,455	0	52,106	50622000	6	0,430486486486487	-0,944079717000324	0,20130612244898	-0,673195521036785	0,48748717948718	0,419451395670574	0,0956756756756757	-1,19782384236654	P09972;K7EKH5;J3KSV6;J3QKP5;A8MVZ9;C9J8F3	P09972;K7EKH5;J3KSV6;J3QKP5;A8MVZ9	Fructose-bisphosphate aldolase C;Fructose-bisphosphate aldolase	ALDOC
NaN	NaN	NaN	NaN	NaN	NaN	24.0694007873535	23.9751758575439	24.2570266723633	23.637767791748	23.1487674713135	23.4429092407227				0	extracellular matrix;extracellular region;proteinaceous extracellular matrix		Cluster -86					+	CMd15_CMd8			5	5	5	15,3	15,3	15,3	40,165	0	46,827	64863000	21	0,842506024096386	NaN	0,794233766233766	NaN	0,04	-0,690719604492188	0,6512	NaN	P10915;D6RBS1;D6RC59;D6RAK7;D6RBX9;D6RFI7;D6RG04	P10915	Hyaluronan and proteoglycan link protein 1	HAPLN1
21.1055278778076	23.3307399749756	23.3790149688721	22.1756038665771	23.1033515930176	21.93678855896	20.2489891052246	20.4086246490479	20.8037281036377	NaN	NaN	NaN				0	cell part;centrosome;cytoplasm;DNA replication factor C complex;extracellular organelle;intracellular membrane-bounded organelle;intracellular non-membrane-bounded organelle;intracellular organelle;macromolecular complex;microtubule organizing center;nucleoplasm;nucleus;organelle;protein complex;vesicle	Base excision repair;Cell cycle;DNA replication;Mismatch repair;Nucleotide excision repair	Cluster -87			+	CMd8_CMd4					2	2	2	10	10	10	28,768	0	31,263	66900000	19	0,989724137931035	-0,199846267700195	0,0226666666666667	-1,91813405354818	0,70096	NaN	0,642028169014084	NaN	P12004	P12004	Proliferating cell nuclear antigen	PCNA
20.2851181030273	20.2398128509521	19.8602695465088	19.717378616333	19.663064956665	20.0891304016113	19.8911304473877	NaN	19.756311416626	NaN	NaN	NaN				0	cell part;cytosol;extracellular organelle;intracellular membrane-bounded organelle;intracellular organelle;mitochondrion;organelle;vesicle	Arginine and proline metabolism	Cluster -87									2	2	2	6	6	6	42,644	0	13,699	16805000	7	0,360444444444444	-0,305208841959633	1	0,000529607137043087	0,691736842105263	NaN	0,633111111111111	NaN	P12277;G3V461;G3V4N7	P12277;G3V461;G3V4N7	Creatine kinase B-type	CKB
26.4572772979736	26.362606048584	26.0237121582031	24.0405120849609	26.2652606964111	23.6458148956299	22.6990966796875	22.500524520874	22.5043621063232	21.5842609405518	21.1262855529785	21.1682758331299				0	cell part;cytoplasm;cytosol;extracellular organelle;intracellular membrane-bounded organelle;intracellular organelle;macromolecular complex;membrane;nucleus;organelle;plasma membrane;polysome;ribonucleoprotein complex;vesicle		Cluster -87					+	CMd15_CMd8	+	CMd15_CMd1	17	17	17	23,3	23,3	23,3	95,337	0	140,03	916790000	70	0,288571428571429	-1,6306692759196	0,0586206896551724	-2,08253479003906	0,0688	-1,27505366007487	0	-4,98825772603353	P13639;K7EJ74;K7EP67;Q15029	P13639	Elongation factor 2	EEF2
25.4784622192383	26.0002613067627	26.1869945526123	25.0800552368164	25.7316150665283	22.8863048553467	21.4079494476318	21.6567420959473	22.3057460784912	20.3498115539551	21.9499530792236	NaN				0	cell part;cytoskeleton;cytosol;extracellular organelle;extracellular region;intracellular non-membrane-bounded organelle;intracellular organelle;macromolecular complex;membrane;organelle;plasma membrane;protein complex;vesicle	Adherens junction;Amoebiasis;Bacterial invasion of epithelial cells;Focal adhesion;Leukocyte transendothelial migration;Regulation of actin cytoskeleton;Shigellosis	Cluster -87			+	CMd8_CMd4			+	CMd15_CMd1	18	18	18	22,2	22,2	22,2	123,8	0	174,55	622130000	90	0,346588235294118	-1,32258097330729	0,0402105263157895	-2,77584584554036	0,4753	-0,640263557434082	0	-4,73869037628174	P18206;A0A096LPE1	P18206	Vinculin	VCL
24.0084705352783	23.9743003845215	24.9783210754395	22.0884838104248	22.4436187744141	22.2987995147705	21.6509704589844	21.60964012146	21.5926342010498	21.2148971557617	21.0219478607178	NaN				0	cell cortex;cell part;extracellular organelle;intracellular membrane-bounded organelle;intracellular non-membrane-bounded organelle;intracellular organelle;macromolecular complex;membrane;nucleolus;nucleoplasm;nucleus;organelle;ribonucleoprotein complex;vesicle	Pathogenic Escherichia coli infection	Cluster -87			+	CMd8_CMd4	+	CMd15_CMd8	+	CMd15_CMd1	10	10	10	17	17	17	76,613	0	98,639	312600000	37	0,229333333333333	-2,04339663187663	0,0408	-0,65921910603841	0,0382222222222222	-0,499325752258301	0	-3,20194149017334	P19338;H7BY16	P19338;H7BY16	Nucleolin	NCL
25.8435478210449	27.1042957305908	27.6381683349609	24.2180061340332	24.6271171569824	23.9163398742676	20.6898708343506	22.2828578948975	23.126522064209	NaN	21.9766616821289	NaN				0	cell body;cell part;cytoplasm;cytoskeleton;cytosol;extracellular organelle;extracellular region;intracellular membrane-bounded organelle;intracellular non-membrane-bounded organelle;intracellular organelle;macromolecular complex;membrane;neuronal cell body;nucleus;organelle;plasma membrane;protein complex;vesicle	Focal adhesion;MAPK signaling pathway	Cluster -87									28	28	26	16,5	16,5	15,7	276,55	0	236,17	756310000	70	0,194	-2,60818290710449	0,0516363636363636	-2,22073745727539	0,682753246753247	-0,0564219156901054	0,624438356164384	-4,88534228006999	Q5HY54;P21333;A0A087WWY3;Q60FE5;F8WE98;H0Y5C6	Q5HY54;P21333;A0A087WWY3;Q60FE5	Filamin-A	FLNA
20.8833045959473	21.9513778686523	20.9492053985596	21.0820636749268	21.6795997619629	NaN	NaN	NaN	19.6043109893799	NaN	NaN	NaN				0	cell part;cytosol;extracellular organelle;membrane;organelle;vesicle	Purine metabolism	Cluster -87									4	4	4	14,1	14,1	14,1	47,079	0	76,206	14310000	10	0,974576271186441	0,11953576405843	0,784051282051282	-1,77652072906494	0,674	NaN	0,616	NaN	P22234;D6RF62;E9PBS1	P22234;D6RF62;E9PBS1	Multifunctional protein ADE2;Phosphoribosylaminoimidazole-succinocarboxamide synthase;Phosphoribosylaminoimidazole carboxylase	PAICS
23.8467063903809	24.5054874420166	24.4423408508301	22.6063003540039	24.0019588470459	21.7693901062012	21.5945491790771	21.1274833679199	21.6261367797852	20.9344501495361	21.6394901275635	21.4375610351563				0	cell part;cytoplasm;cytosol;extracellular organelle;intracellular membrane-bounded organelle;intracellular organelle;mitochondrion;nucleus;organelle;vesicle	Parkinson's disease;Ubiquitin mediated proteolysis	Cluster -87							+	CMd15_CMd1	11	11	11	16	16	16	117,85	0	202,81	176100000	69	0,272666666666667	-1,47229512532552	0,0951578947368421	-1,34315999348959	0,7605	-0,112222671508789	0	-2,92767779032389	P22314;Q5JRR6;Q5JRS1;Q5JRS3;Q5JRS2;Q5JRR9;Q5JRS0	P22314	Ubiquitin-like modifier-activating enzyme 1	UBA1
NaN	NaN	NaN	NaN	NaN	22.0337219238281	23.3363361358643	23.6479015350342	22.4439220428467	NaN	NaN	NaN				0	extracellular matrix;extracellular organelle;extracellular region;extracellular space;organelle;proteinaceous extracellular matrix;vesicle		Cluster -88									6	6	1	12,7	12,7	3,3	77,213	0	59,136	89122000	17	0,83247619047619	NaN	0,774126582278481	1,10899798075358	0,66546835443038	NaN	0,607786666666667	NaN	P23142	P23142	Fibulin-1	FBLN1
[truncated: 29 more rows]
