# Supplementary material for: Secretome Analysis Performed During in vitro Cardiac Differentiation: Discovering the Cardiac Microenvironment
Source: Front Cell Dev Biol. 2020 Feb 7;8:49. doi: 10.3389/fcell.2020.00049 (PMC7025591; doi:10.3389/fcell.2020.00049)
Supplement: Supplementary file 2 [file Table_2.XLSX]

## Sheet: upCMd8xCMd4
#pathway ID	pathway description	observed gene count	false discovery rate	matching proteins in your network (IDs)	matching proteins in your network (labels)
GO.0072358	cardiovascular system development	11	4.01e-06	ENSP00000231061,ENSP00000233242,ENSP00000252486,ENSP00000261590,ENSP00000274625,ENSP00000313437,ENSP00000347665,ENSP00000355896,ENSP00000361125,ENSP00000363827,ENSP00000369889	APOB,APOE,COL18A1,COL2A1,DSG2,FGF18,HSPG2,MMP19,SPARC,TGFB2,VEGFA
GO.0072359	circulatory system development	11	4.01e-06	ENSP00000231061,ENSP00000233242,ENSP00000252486,ENSP00000261590,ENSP00000274625,ENSP00000313437,ENSP00000347665,ENSP00000355896,ENSP00000361125,ENSP00000363827,ENSP00000369889	APOB,APOE,COL18A1,COL2A1,DSG2,FGF18,HSPG2,MMP19,SPARC,TGFB2,VEGFA
GO.0042698	ovulation cycle	6	1.08e-05	ENSP00000267843,ENSP00000287814,ENSP00000313437,ENSP00000355896,ENSP00000361125,ENSP00000379138	AFP,FGF7,MMP19,TGFB2,TIMP4,VEGFA
GO.0051270	regulation of cellular component movement	10	1.49e-05	ENSP00000231061,ENSP00000252486,ENSP00000258743,ENSP00000261590,ENSP00000267843,ENSP00000274625,ENSP00000347665,ENSP00000355896,ENSP00000361125,ENSP00000370473	APOE,COL18A1,DSG2,FGF18,FGF7,IGFBP3,IL6,SPARC,TGFB2,VEGFA
GO.0030198	extracellular matrix organization	8	1.55e-05	ENSP00000216286,ENSP00000231061,ENSP00000274341,ENSP00000313437,ENSP00000347665,ENSP00000355896,ENSP00000363827,ENSP00000369889	COL18A1,COL2A1,HAPLN1,HSPG2,MMP19,NID2,SPARC,TGFB2
GO.1901700	response to oxygen-containing compound	12	1.58e-05	ENSP00000231061,ENSP00000233242,ENSP00000252486,ENSP00000258743,ENSP00000261590,ENSP00000267843,ENSP00000274625,ENSP00000287814,ENSP00000313437,ENSP00000347665,ENSP00000350425,ENSP00000355896	APOA4,APOB,APOE,COL18A1,DSG2,FGF18,FGF7,IL6,MMP19,SPARC,TGFB2,TIMP4
GO.0048514	blood vessel morphogenesis	8	1.78e-05	ENSP00000233242,ENSP00000252486,ENSP00000274625,ENSP00000313437,ENSP00000347665,ENSP00000355896,ENSP00000361125,ENSP00000363827	APOB,APOE,COL18A1,FGF18,HSPG2,MMP19,TGFB2,VEGFA
GO.0048731	system development	17	2.25e-05	ENSP00000231061,ENSP00000233242,ENSP00000246186,ENSP00000252486,ENSP00000258743,ENSP00000261590,ENSP00000274341,ENSP00000274625,ENSP00000287814,ENSP00000313437,ENSP00000350425,ENSP00000355896,ENSP00000357980,ENSP00000361125,ENSP00000363827,ENSP00000369889,ENSP00000379138	AFP,APOA4,APOB,APOE,COL2A1,DSG2,FGF18,HAPLN1,HSPG2,HTRA1,IL6,MMP19,MMP24,SPARC,TGFB2,TIMP4,VEGFA
GO.0030334	regulation of cell migration	9	2.45e-05	ENSP00000231061,ENSP00000252486,ENSP00000258743,ENSP00000267843,ENSP00000274625,ENSP00000347665,ENSP00000355896,ENSP00000361125,ENSP00000370473	APOE,COL18A1,FGF18,FGF7,IGFBP3,IL6,SPARC,TGFB2,VEGFA
GO.0010632	regulation of epithelial cell migration	6	3.04e-05	ENSP00000231061,ENSP00000252486,ENSP00000267843,ENSP00000274625,ENSP00000355896,ENSP00000361125	APOE,FGF18,FGF7,SPARC,TGFB2,VEGFA
GO.0050678	regulation of epithelial cell proliferation	7	3.04e-05	ENSP00000231061,ENSP00000252486,ENSP00000258743,ENSP00000267843,ENSP00000355896,ENSP00000357980,ENSP00000361125	APOE,FGF7,HTRA1,IL6,SPARC,TGFB2,VEGFA
GO.0001568	blood vessel development	8	3.8e-05	ENSP00000233242,ENSP00000252486,ENSP00000274625,ENSP00000313437,ENSP00000347665,ENSP00000355896,ENSP00000361125,ENSP00000363827	APOB,APOE,COL18A1,FGF18,HSPG2,MMP19,TGFB2,VEGFA
GO.0001944	vasculature development	8	4.69e-05	ENSP00000233242,ENSP00000252486,ENSP00000274625,ENSP00000313437,ENSP00000347665,ENSP00000355896,ENSP00000361125,ENSP00000363827	APOB,APOE,COL18A1,FGF18,HSPG2,MMP19,TGFB2,VEGFA
GO.0022602	ovulation cycle process	5	4.69e-05	ENSP00000267843,ENSP00000313437,ENSP00000355896,ENSP00000361125,ENSP00000379138	AFP,FGF7,MMP19,TGFB2,VEGFA
GO.0010634	positive regulation of epithelial cell migration	5	6.91e-05	ENSP00000231061,ENSP00000267843,ENSP00000274625,ENSP00000355896,ENSP00000361125	FGF18,FGF7,SPARC,TGFB2,VEGFA
GO.0044767	single-organism developmental process	18	6.91e-05	ENSP00000231061,ENSP00000233242,ENSP00000246186,ENSP00000252486,ENSP00000258743,ENSP00000261590,ENSP00000274341,ENSP00000274625,ENSP00000287814,ENSP00000313437,ENSP00000350425,ENSP00000355896,ENSP00000357980,ENSP00000361125,ENSP00000363827,ENSP00000369889,ENSP00000370473,ENSP00000379138	AFP,APOA4,APOB,APOE,COL2A1,DSG2,FGF18,HAPLN1,HSPG2,HTRA1,IGFBP3,IL6,MMP19,MMP24,SPARC,TGFB2,TIMP4,VEGFA
GO.0007275	multicellular organismal development	17	7.99e-05	ENSP00000231061,ENSP00000233242,ENSP00000246186,ENSP00000252486,ENSP00000258743,ENSP00000261590,ENSP00000274341,ENSP00000274625,ENSP00000287814,ENSP00000313437,ENSP00000350425,ENSP00000355896,ENSP00000357980,ENSP00000361125,ENSP00000363827,ENSP00000369889,ENSP00000379138	AFP,APOA4,APOB,APOE,COL2A1,DSG2,FGF18,HAPLN1,HSPG2,HTRA1,IL6,MMP19,MMP24,SPARC,TGFB2,TIMP4,VEGFA
GO.0030335	positive regulation of cell migration	7	7.99e-05	ENSP00000231061,ENSP00000258743,ENSP00000267843,ENSP00000274625,ENSP00000347665,ENSP00000355896,ENSP00000361125	COL18A1,FGF18,FGF7,IL6,SPARC,TGFB2,VEGFA
GO.0009628	response to abiotic stimulus	10	0.000135	ENSP00000231061,ENSP00000233242,ENSP00000246186,ENSP00000252486,ENSP00000258743,ENSP00000347665,ENSP00000350425,ENSP00000355896,ENSP00000361125,ENSP00000363827	APOA4,APOB,APOE,COL18A1,HSPG2,IL6,MMP24,SPARC,TGFB2,VEGFA
GO.0042127	regulation of cell proliferation	11	0.000154	ENSP00000231061,ENSP00000252486,ENSP00000258743,ENSP00000267843,ENSP00000274625,ENSP00000279804,ENSP00000301464,ENSP00000355896,ENSP00000357980,ENSP00000361125,ENSP00000370473	APOE,CTF1,FGF18,FGF7,HTRA1,IGFBP3,IGFBP6,IL6,SPARC,TGFB2,VEGFA
GO.0009887	organ morphogenesis	9	0.000197	ENSP00000258743,ENSP00000267843,ENSP00000274625,ENSP00000347665,ENSP00000355896,ENSP00000357980,ENSP00000361125,ENSP00000363827,ENSP00000369889	COL18A1,COL2A1,FGF18,FGF7,HSPG2,HTRA1,IL6,TGFB2,VEGFA
GO.0032502	developmental process	17	0.000421	ENSP00000231061,ENSP00000233242,ENSP00000246186,ENSP00000252486,ENSP00000258743,ENSP00000261590,ENSP00000274341,ENSP00000287814,ENSP00000313437,ENSP00000350425,ENSP00000355896,ENSP00000357980,ENSP00000361125,ENSP00000363827,ENSP00000369889,ENSP00000370473,ENSP00000379138	AFP,APOA4,APOB,APOE,COL2A1,DSG2,HAPLN1,HSPG2,HTRA1,IGFBP3,IL6,MMP19,MMP24,SPARC,TGFB2,TIMP4,VEGFA
GO.0048856	anatomical structure development	16	0.000497	ENSP00000231061,ENSP00000233242,ENSP00000246186,ENSP00000252486,ENSP00000258743,ENSP00000261590,ENSP00000274341,ENSP00000287814,ENSP00000313437,ENSP00000350425,ENSP00000355896,ENSP00000357980,ENSP00000361125,ENSP00000363827,ENSP00000369889,ENSP00000379138	AFP,APOA4,APOB,APOE,COL2A1,DSG2,HAPLN1,HSPG2,HTRA1,IL6,MMP19,MMP24,SPARC,TGFB2,TIMP4,VEGFA
GO.0034377	plasma lipoprotein particle assembly	3	0.000545	ENSP00000233242,ENSP00000252486,ENSP00000350425	APOA4,APOB,APOE
GO.0001525	angiogenesis	6	0.000567	ENSP00000274625,ENSP00000313437,ENSP00000347665,ENSP00000355896,ENSP00000361125,ENSP00000363827	COL18A1,FGF18,HSPG2,MMP19,TGFB2,VEGFA
GO.0048609	multicellular organismal reproductive process	8	0.00069	ENSP00000233242,ENSP00000261590,ENSP00000267843,ENSP00000287814,ENSP00000313437,ENSP00000355896,ENSP00000361125,ENSP00000379138	AFP,APOB,DSG2,FGF7,MMP19,TGFB2,TIMP4,VEGFA
GO.0001523	retinoid metabolic process	4	0.00072	ENSP00000233242,ENSP00000252486,ENSP00000350425,ENSP00000363827	APOA4,APOB,APOE,HSPG2
GO.0032504	multicellular organism reproduction	8	0.000763	ENSP00000233242,ENSP00000261590,ENSP00000267843,ENSP00000287814,ENSP00000313437,ENSP00000355896,ENSP00000361125,ENSP00000379138	AFP,APOB,DSG2,FGF7,MMP19,TGFB2,TIMP4,VEGFA
GO.0048513	organ development	13	0.000763	ENSP00000231061,ENSP00000258743,ENSP00000261590,ENSP00000274625,ENSP00000279804,ENSP00000313437,ENSP00000347665,ENSP00000355896,ENSP00000357980,ENSP00000361125,ENSP00000363827,ENSP00000369889,ENSP00000379138	AFP,COL18A1,COL2A1,CTF1,DSG2,FGF18,HSPG2,HTRA1,IL6,MMP19,SPARC,TGFB2,VEGFA
GO.0009581	detection of external stimulus	5	0.000797	ENSP00000233242,ENSP00000246186,ENSP00000252486,ENSP00000350425,ENSP00000363827	APOA4,APOB,APOE,HSPG2,MMP24
GO.0009582	detection of abiotic stimulus	5	0.000825	ENSP00000233242,ENSP00000246186,ENSP00000252486,ENSP00000350425,ENSP00000363827	APOA4,APOB,APOE,HSPG2,MMP24
GO.0008284	positive regulation of cell proliferation	8	0.000848	ENSP00000258743,ENSP00000267843,ENSP00000274625,ENSP00000279804,ENSP00000347665,ENSP00000355896,ENSP00000357980,ENSP00000361125	COL18A1,CTF1,FGF18,FGF7,HTRA1,IL6,TGFB2,VEGFA
GO.0044243	multicellular organismal catabolic process	4	0.000855	ENSP00000313437,ENSP00000347665,ENSP00000350425,ENSP00000369889	APOA4,COL18A1,COL2A1,MMP19
GO.0032879	regulation of localization	12	0.000881	ENSP00000231061,ENSP00000233242,ENSP00000252486,ENSP00000258743,ENSP00000261590,ENSP00000267843,ENSP00000274625,ENSP00000347665,ENSP00000350425,ENSP00000355896,ENSP00000361125,ENSP00000370473	APOA4,APOB,APOE,COL18A1,DSG2,FGF18,FGF7,IGFBP3,IL6,SPARC,TGFB2,VEGFA
GO.0001558	regulation of cell growth	6	0.00106	ENSP00000252486,ENSP00000301464,ENSP00000355896,ENSP00000357980,ENSP00000361125,ENSP00000370473	APOE,HTRA1,IGFBP3,IGFBP6,TGFB2,VEGFA
GO.0034369	plasma lipoprotein particle remodeling	3	0.00106	ENSP00000233242,ENSP00000252486,ENSP00000350425	APOA4,APOB,APOE
GO.0009725	response to hormone	8	0.00126	ENSP00000231061,ENSP00000233242,ENSP00000258743,ENSP00000261590,ENSP00000267843,ENSP00000274625,ENSP00000313437,ENSP00000355896	APOB,DSG2,FGF18,FGF7,IL6,MMP19,SPARC,TGFB2
GO.0007603	phototransduction, visible light	4	0.00131	ENSP00000233242,ENSP00000252486,ENSP00000350425,ENSP00000363827	APOA4,APOB,APOE,HSPG2
GO.0008585	female gonad development	4	0.00138	ENSP00000267843,ENSP00000313437,ENSP00000361125,ENSP00000379138	AFP,FGF7,MMP19,VEGFA
GO.0033344	cholesterol efflux	3	0.00138	ENSP00000233242,ENSP00000252486,ENSP00000350425	APOA4,APOB,APOE
GO.0001958	endochondral ossification	3	0.00144	ENSP00000274625,ENSP00000363827,ENSP00000369889	COL2A1,FGF18,HSPG2
GO.0007435	salivary gland morphogenesis	3	0.00144	ENSP00000258743,ENSP00000267843,ENSP00000355896	FGF7,IL6,TGFB2
GO.0046545	development of primary female sexual characteristics	4	0.00156	ENSP00000267843,ENSP00000313437,ENSP00000361125,ENSP00000379138	AFP,FGF7,MMP19,VEGFA
GO.0048468	cell development	10	0.00156	ENSP00000246186,ENSP00000252486,ENSP00000258743,ENSP00000274625,ENSP00000279804,ENSP00000347665,ENSP00000350425,ENSP00000355896,ENSP00000361125,ENSP00000369889	APOA4,APOE,COL18A1,COL2A1,CTF1,FGF18,IL6,MMP24,TGFB2,VEGFA
GO.0010594	regulation of endothelial cell migration	4	0.00166	ENSP00000231061,ENSP00000252486,ENSP00000274625,ENSP00000361125	APOE,FGF18,SPARC,VEGFA
GO.0019433	triglyceride catabolic process	3	0.00166	ENSP00000233242,ENSP00000252486,ENSP00000350425	APOA4,APOB,APOE
GO.0007431	salivary gland development	3	0.00172	ENSP00000258743,ENSP00000267843,ENSP00000355896	FGF7,IL6,TGFB2
GO.0008285	negative regulation of cell proliferation	7	0.00172	ENSP00000231061,ENSP00000252486,ENSP00000258743,ENSP00000301464,ENSP00000347665,ENSP00000355896,ENSP00000370473	APOE,COL18A1,IGFBP3,IGFBP6,IL6,SPARC,TGFB2
GO.0032270	positive regulation of cellular protein metabolic process	9	0.00186	ENSP00000241261,ENSP00000252486,ENSP00000258743,ENSP00000267843,ENSP00000274625,ENSP00000279804,ENSP00000355896,ENSP00000361125,ENSP00000370473	APOE,CTF1,FGF18,FGF7,IGFBP3,IL6,TGFB2,TNFSF10,VEGFA
GO.0045937	positive regulation of phosphate metabolic process	8	0.00186	ENSP00000252486,ENSP00000258743,ENSP00000267843,ENSP00000274625,ENSP00000279804,ENSP00000355896,ENSP00000361125,ENSP00000370473	APOE,CTF1,FGF18,FGF7,IGFBP3,IL6,TGFB2,VEGFA
GO.0046660	female sex differentiation	4	0.00204	ENSP00000267843,ENSP00000313437,ENSP00000361125,ENSP00000379138	AFP,FGF7,MMP19,VEGFA
GO.0001503	ossification	5	0.00213	ENSP00000231061,ENSP00000274625,ENSP00000363827,ENSP00000369889,ENSP00000370473	COL2A1,FGF18,HSPG2,IGFBP3,SPARC
GO.0022617	extracellular matrix disassembly	4	0.00213	ENSP00000313437,ENSP00000347665,ENSP00000363827,ENSP00000369889	COL18A1,COL2A1,HSPG2,MMP19
GO.0048646	anatomical structure formation involved in morphogenesis	8	0.00213	ENSP00000274625,ENSP00000313437,ENSP00000347665,ENSP00000355896,ENSP00000357980,ENSP00000361125,ENSP00000363827,ENSP00000369889	COL18A1,COL2A1,FGF18,HSPG2,HTRA1,MMP19,TGFB2,VEGFA
GO.0007507	heart development	6	0.00216	ENSP00000231061,ENSP00000261590,ENSP00000355896,ENSP00000361125,ENSP00000363827,ENSP00000369889	COL2A1,DSG2,HSPG2,SPARC,TGFB2,VEGFA
GO.0001501	skeletal system development	6	0.00222	ENSP00000231061,ENSP00000274341,ENSP00000274625,ENSP00000355896,ENSP00000363827,ENSP00000369889	COL2A1,FGF18,HAPLN1,HSPG2,SPARC,TGFB2
GO.0009719	response to endogenous stimulus	9	0.0029	ENSP00000231061,ENSP00000233242,ENSP00000258743,ENSP00000261590,ENSP00000267843,ENSP00000274625,ENSP00000313437,ENSP00000355896,ENSP00000369889	APOB,COL2A1,DSG2,FGF18,FGF7,IL6,MMP19,SPARC,TGFB2
GO.0044702	single organism reproductive process	8	0.00297	ENSP00000233242,ENSP00000261590,ENSP00000267843,ENSP00000287814,ENSP00000313437,ENSP00000355896,ENSP00000361125,ENSP00000379138	AFP,APOB,DSG2,FGF7,MMP19,TGFB2,TIMP4,VEGFA
GO.0035272	exocrine system development	3	0.00378	ENSP00000258743,ENSP00000267843,ENSP00000355896	FGF7,IL6,TGFB2
GO.0048523	negative regulation of cellular process	14	0.00382	ENSP00000231061,ENSP00000241261,ENSP00000246186,ENSP00000252486,ENSP00000258743,ENSP00000287814,ENSP00000301464,ENSP00000347665,ENSP00000350425,ENSP00000355896,ENSP00000357980,ENSP00000361125,ENSP00000369889,ENSP00000370473	APOA4,APOE,COL18A1,COL2A1,HTRA1,IGFBP3,IGFBP6,IL6,MMP24,SPARC,TGFB2,TIMP4,TNFSF10,VEGFA
GO.0097006	regulation of plasma lipoprotein particle levels	3	0.00391	ENSP00000233242,ENSP00000252486,ENSP00000350425	APOA4,APOB,APOE
GO.0051094	positive regulation of developmental process	8	0.00397	ENSP00000233242,ENSP00000252486,ENSP00000258743,ENSP00000267843,ENSP00000274625,ENSP00000355896,ENSP00000361125,ENSP00000370473	APOB,APOE,FGF18,FGF7,IGFBP3,IL6,TGFB2,VEGFA
GO.0001934	positive regulation of protein phosphorylation	7	0.00442	ENSP00000258743,ENSP00000267843,ENSP00000274625,ENSP00000279804,ENSP00000355896,ENSP00000361125,ENSP00000370473	CTF1,FGF18,FGF7,IGFBP3,IL6,TGFB2,VEGFA
GO.0045597	positive regulation of cell differentiation	7	0.00448	ENSP00000233242,ENSP00000252486,ENSP00000258743,ENSP00000274625,ENSP00000355896,ENSP00000361125,ENSP00000370473	APOB,APOE,FGF18,IGFBP3,IL6,TGFB2,VEGFA
GO.0048738	cardiac muscle tissue development	4	0.0045	ENSP00000261590,ENSP00000355896,ENSP00000361125,ENSP00000363827	DSG2,HSPG2,TGFB2,VEGFA
GO.0050679	positive regulation of epithelial cell proliferation	4	0.0047	ENSP00000258743,ENSP00000267843,ENSP00000357980,ENSP00000361125	FGF7,HTRA1,IL6,VEGFA
GO.0034380	high-density lipoprotein particle assembly	2	0.00472	ENSP00000252486,ENSP00000350425	APOA4,APOE
GO.1902533	positive regulation of intracellular signal transduction	7	0.00484	ENSP00000241261,ENSP00000258743,ENSP00000274625,ENSP00000279804,ENSP00000355896,ENSP00000361125,ENSP00000370473	CTF1,FGF18,IGFBP3,IL6,TGFB2,TNFSF10,VEGFA
GO.0051216	cartilage development	4	0.00521	ENSP00000274625,ENSP00000355896,ENSP00000363827,ENSP00000369889	COL2A1,FGF18,HSPG2,TGFB2
GO.0050731	positive regulation of peptidyl-tyrosine phosphorylation	4	0.00537	ENSP00000258743,ENSP00000267843,ENSP00000279804,ENSP00000361125	CTF1,FGF7,IL6,VEGFA
GO.0007399	nervous system development	10	0.00545	ENSP00000233242,ENSP00000246186,ENSP00000252486,ENSP00000258743,ENSP00000274341,ENSP00000287814,ENSP00000350425,ENSP00000355896,ENSP00000361125,ENSP00000363827	APOA4,APOB,APOE,HAPLN1,HSPG2,IL6,MMP24,TGFB2,TIMP4,VEGFA
GO.0010033	response to organic substance	11	0.00552	ENSP00000231061,ENSP00000233242,ENSP00000258743,ENSP00000261590,ENSP00000267843,ENSP00000274625,ENSP00000313437,ENSP00000355896,ENSP00000361125,ENSP00000369889,ENSP00000379138	AFP,APOB,COL2A1,DSG2,FGF18,FGF7,IL6,MMP19,SPARC,TGFB2,VEGFA
GO.0048844	artery morphogenesis	3	0.00552	ENSP00000233242,ENSP00000252486,ENSP00000361125	APOB,APOE,VEGFA
GO.0010873	positive regulation of cholesterol esterification	2	0.00558	ENSP00000252486,ENSP00000350425	APOA4,APOE
GO.0042159	lipoprotein catabolic process	2	0.00558	ENSP00000233242,ENSP00000252486	APOB,APOE
GO.0044707	single-multicellular organism process	16	0.00558	ENSP00000233242,ENSP00000246186,ENSP00000252486,ENSP00000258743,ENSP00000261590,ENSP00000274341,ENSP00000274625,ENSP00000287814,ENSP00000350425,ENSP00000355896,ENSP00000357980,ENSP00000361125,ENSP00000363827,ENSP00000369889,ENSP00000370473,ENSP00000379138	AFP,APOA4,APOB,APOE,COL2A1,DSG2,FGF18,HAPLN1,HSPG2,HTRA1,IGFBP3,IL6,MMP24,TGFB2,TIMP4,VEGFA
GO.2001028	positive regulation of endothelial cell chemotaxis	2	0.00558	ENSP00000274625,ENSP00000361125	FGF18,VEGFA
GO.0060348	bone development	4	0.00573	ENSP00000231061,ENSP00000274625,ENSP00000363827,ENSP00000369889	COL2A1,FGF18,HSPG2,SPARC
GO.0001541	ovarian follicle development	3	0.00579	ENSP00000267843,ENSP00000313437,ENSP00000361125	FGF7,MMP19,VEGFA
GO.0032101	regulation of response to external stimulus	7	0.00624	ENSP00000252486,ENSP00000258743,ENSP00000267843,ENSP00000274341,ENSP00000274625,ENSP00000357980,ENSP00000361125	APOE,FGF18,FGF7,HAPLN1,HTRA1,IL6,VEGFA
GO.0060350	endochondral bone morphogenesis	3	0.00667	ENSP00000274625,ENSP00000363827,ENSP00000369889	COL2A1,FGF18,HSPG2
GO.0010595	positive regulation of endothelial cell migration	3	0.00689	ENSP00000231061,ENSP00000274625,ENSP00000361125	FGF18,SPARC,VEGFA
GO.0042632	cholesterol homeostasis	3	0.00689	ENSP00000233242,ENSP00000252486,ENSP00000350425	APOA4,APOB,APOE
GO.1901617	organic hydroxy compound biosynthetic process	4	0.00699	ENSP00000252486,ENSP00000267843,ENSP00000350425,ENSP00000355896	APOA4,APOE,FGF7,TGFB2
GO.0009653	anatomical structure morphogenesis	10	0.00718	ENSP00000233242,ENSP00000252486,ENSP00000258743,ENSP00000267843,ENSP00000313437,ENSP00000355896,ENSP00000357980,ENSP00000361125,ENSP00000363827,ENSP00000369889	APOB,APOE,COL2A1,FGF7,HSPG2,HTRA1,IL6,MMP19,TGFB2,VEGFA
GO.0030154	cell differentiation	12	0.00718	ENSP00000246186,ENSP00000252486,ENSP00000258743,ENSP00000274625,ENSP00000279804,ENSP00000313437,ENSP00000347665,ENSP00000350425,ENSP00000355896,ENSP00000361125,ENSP00000363827,ENSP00000370473	APOA4,APOE,COL18A1,CTF1,FGF18,HSPG2,IGFBP3,IL6,MMP19,MMP24,TGFB2,VEGFA
GO.0043408	regulation of MAPK cascade	6	0.00718	ENSP00000252486,ENSP00000258743,ENSP00000274625,ENSP00000355896,ENSP00000361125,ENSP00000370473	APOE,FGF18,IGFBP3,IL6,TGFB2,VEGFA
GO.0060840	artery development	3	0.00718	ENSP00000233242,ENSP00000252486,ENSP00000361125	APOB,APOE,VEGFA
GO.0002062	chondrocyte differentiation	3	0.00747	ENSP00000274625,ENSP00000363827,ENSP00000369889	COL2A1,FGF18,HSPG2
GO.0001542	ovulation from ovarian follicle	2	0.00766	ENSP00000313437,ENSP00000379138	AFP,MMP19
GO.0030324	lung development	4	0.00766	ENSP00000231061,ENSP00000267843,ENSP00000274625,ENSP00000361125	FGF18,FGF7,SPARC,VEGFA
GO.0034372	very-low-density lipoprotein particle remodeling	2	0.00766	ENSP00000252486,ENSP00000350425	APOA4,APOE
GO.0007267	cell-cell signaling	7	0.00779	ENSP00000241261,ENSP00000252486,ENSP00000258743,ENSP00000267843,ENSP00000274625,ENSP00000279804,ENSP00000355896	APOE,CTF1,FGF18,FGF7,IL6,TGFB2,TNFSF10
GO.0044093	positive regulation of molecular function	9	0.00787	ENSP00000241261,ENSP00000246186,ENSP00000252486,ENSP00000258743,ENSP00000274625,ENSP00000350425,ENSP00000355896,ENSP00000361125,ENSP00000370473	APOA4,APOE,FGF18,IGFBP3,IL6,MMP24,TGFB2,TNFSF10,VEGFA
GO.0030323	respiratory tube development	4	0.00796	ENSP00000231061,ENSP00000267843,ENSP00000274625,ENSP00000361125	FGF18,FGF7,SPARC,VEGFA
GO.0051128	regulation of cellular component organization	10	0.00812	ENSP00000231061,ENSP00000241261,ENSP00000252486,ENSP00000258743,ENSP00000274341,ENSP00000301464,ENSP00000355896,ENSP00000357980,ENSP00000361125,ENSP00000370473	APOE,HAPLN1,HTRA1,IGFBP3,IGFBP6,IL6,SPARC,TGFB2,TNFSF10,VEGFA
GO.0071363	cellular response to growth factor stimulus	6	0.00864	ENSP00000231061,ENSP00000267843,ENSP00000274625,ENSP00000355896,ENSP00000361125,ENSP00000369889	COL2A1,FGF18,FGF7,SPARC,TGFB2,VEGFA
GO.0034374	low-density lipoprotein particle remodeling	2	0.00867	ENSP00000233242,ENSP00000252486	APOB,APOE
GO.0043129	surfactant homeostasis	2	0.00867	ENSP00000267843,ENSP00000361125	FGF7,VEGFA
GO.0032269	negative regulation of cellular protein metabolic process	7	0.00916	ENSP00000241261,ENSP00000252486,ENSP00000258743,ENSP00000287814,ENSP00000355896,ENSP00000361125,ENSP00000370473	APOE,IGFBP3,IL6,TGFB2,TIMP4,TNFSF10,VEGFA
GO.0030574	collagen catabolic process	3	0.00942	ENSP00000313437,ENSP00000347665,ENSP00000369889	COL18A1,COL2A1,MMP19
GO.0050790	regulation of catalytic activity	10	0.00953	ENSP00000241261,ENSP00000246186,ENSP00000252486,ENSP00000258743,ENSP00000274625,ENSP00000287814,ENSP00000350425,ENSP00000355896,ENSP00000361125,ENSP00000370473	APOA4,APOE,FGF18,IGFBP3,IL6,MMP24,TGFB2,TIMP4,TNFSF10,VEGFA
GO.0031175	neuron projection development	6	0.00979	ENSP00000252486,ENSP00000258743,ENSP00000350425,ENSP00000355896,ENSP00000361125,ENSP00000369889	APOA4,APOE,COL2A1,IL6,TGFB2,VEGFA
GO.0051346	negative regulation of hydrolase activity	5	0.00979	ENSP00000241261,ENSP00000258743,ENSP00000287814,ENSP00000355896,ENSP00000361125	IL6,TGFB2,TIMP4,TNFSF10,VEGFA
GO.0061448	connective tissue development	4	0.00985	ENSP00000274625,ENSP00000355896,ENSP00000363827,ENSP00000369889	COL2A1,FGF18,HSPG2,TGFB2
GO.0048732	gland development	5	0.0103	ENSP00000258743,ENSP00000267843,ENSP00000355896,ENSP00000361125,ENSP00000379138	AFP,FGF7,IL6,TGFB2,VEGFA
GO.0019218	regulation of steroid metabolic process	3	0.0111	ENSP00000233242,ENSP00000252486,ENSP00000350425	APOA4,APOB,APOE
GO.0097529	myeloid leukocyte migration	3	0.0111	ENSP00000258743,ENSP00000355896,ENSP00000361125	IL6,TGFB2,VEGFA
GO.1902531	regulation of intracellular signal transduction	8	0.0111	ENSP00000241261,ENSP00000252486,ENSP00000258743,ENSP00000274625,ENSP00000279804,ENSP00000355896,ENSP00000361125,ENSP00000370473	APOE,CTF1,FGF18,IGFBP3,IL6,TGFB2,TNFSF10,VEGFA
GO.0042060	wound healing	6	0.0112	ENSP00000231061,ENSP00000233242,ENSP00000258743,ENSP00000267843,ENSP00000355896,ENSP00000361125	APOB,FGF7,IL6,SPARC,TGFB2,VEGFA
GO.0043410	positive regulation of MAPK cascade	5	0.0112	ENSP00000258743,ENSP00000274625,ENSP00000355896,ENSP00000361125,ENSP00000370473	FGF18,IGFBP3,IL6,TGFB2,VEGFA
GO.0010035	response to inorganic substance	5	0.0116	ENSP00000231061,ENSP00000233242,ENSP00000258743,ENSP00000347665,ENSP00000350425	APOA4,APOB,COL18A1,IL6,SPARC
GO.0022008	neurogenesis	8	0.0116	ENSP00000246186,ENSP00000252486,ENSP00000258743,ENSP00000279804,ENSP00000350425,ENSP00000355896,ENSP00000361125,ENSP00000369889	APOA4,APOE,COL2A1,CTF1,IL6,MMP24,TGFB2,VEGFA
GO.0043434	response to peptide hormone	5	0.0116	ENSP00000231061,ENSP00000258743,ENSP00000267843,ENSP00000274625,ENSP00000287814	FGF18,FGF7,IL6,SPARC,TIMP4
GO.0048705	skeletal system morphogenesis	4	0.0116	ENSP00000274625,ENSP00000355896,ENSP00000363827,ENSP00000369889	COL2A1,FGF18,HSPG2,TGFB2
GO.0060541	respiratory system development	4	0.0116	ENSP00000231061,ENSP00000267843,ENSP00000274625,ENSP00000361125	FGF18,FGF7,SPARC,VEGFA
GO.0034375	high-density lipoprotein particle remodeling	2	0.0118	ENSP00000252486,ENSP00000350425	APOA4,APOE
GO.0045540	regulation of cholesterol biosynthetic process	2	0.0118	ENSP00000233242,ENSP00000252486	APOB,APOE
GO.0051248	negative regulation of protein metabolic process	7	0.0118	ENSP00000241261,ENSP00000252486,ENSP00000287814,ENSP00000350425,ENSP00000355896,ENSP00000361125,ENSP00000370473	APOA4,APOE,IGFBP3,TGFB2,TIMP4,TNFSF10,VEGFA
GO.0043085	positive regulation of catalytic activity	8	0.0123	ENSP00000241261,ENSP00000246186,ENSP00000252486,ENSP00000274625,ENSP00000350425,ENSP00000355896,ENSP00000361125,ENSP00000370473	APOA4,APOE,FGF18,IGFBP3,MMP24,TGFB2,TNFSF10,VEGFA
GO.0007165	signal transduction	14	0.0127	ENSP00000231061,ENSP00000233242,ENSP00000241261,ENSP00000252486,ENSP00000258743,ENSP00000267843,ENSP00000274625,ENSP00000279804,ENSP00000301464,ENSP00000350425,ENSP00000355896,ENSP00000361125,ENSP00000363827,ENSP00000379138	AFP,APOA4,APOB,APOE,CTF1,FGF18,FGF7,HSPG2,IGFBP6,IL6,SPARC,TGFB2,TNFSF10,VEGFA
GO.0009605	response to external stimulus	9	0.0132	ENSP00000231061,ENSP00000246186,ENSP00000258743,ENSP00000267843,ENSP00000287814,ENSP00000350425,ENSP00000361125,ENSP00000363827,ENSP00000369889	APOA4,COL2A1,FGF7,HSPG2,IL6,MMP24,SPARC,TIMP4,VEGFA
GO.0033700	phospholipid efflux	2	0.0132	ENSP00000252486,ENSP00000350425	APOA4,APOE
GO.0002576	platelet degranulation	3	0.0136	ENSP00000231061,ENSP00000355896,ENSP00000361125	SPARC,TGFB2,VEGFA
GO.0008202	steroid metabolic process	4	0.0137	ENSP00000233242,ENSP00000252486,ENSP00000350425,ENSP00000379138	AFP,APOA4,APOB,APOE
GO.0001936	regulation of endothelial cell proliferation	3	0.0143	ENSP00000231061,ENSP00000252486,ENSP00000361125	APOE,SPARC,VEGFA
GO.0010951	negative regulation of endopeptidase activity	4	0.0143	ENSP00000241261,ENSP00000258743,ENSP00000287814,ENSP00000361125	IL6,TIMP4,TNFSF10,VEGFA
GO.0030168	platelet activation	4	0.0143	ENSP00000231061,ENSP00000258743,ENSP00000355896,ENSP00000361125	IL6,SPARC,TGFB2,VEGFA
GO.0030949	positive regulation of vascular endothelial growth factor receptor signaling pathway	2	0.0143	ENSP00000274625,ENSP00000361125	FGF18,VEGFA
GO.0043154	negative regulation of cysteine-type endopeptidase activity involved in apoptotic process	3	0.0143	ENSP00000241261,ENSP00000258743,ENSP00000361125	IL6,TNFSF10,VEGFA
GO.0045595	regulation of cell differentiation	8	0.0143	ENSP00000233242,ENSP00000246186,ENSP00000252486,ENSP00000258743,ENSP00000274625,ENSP00000355896,ENSP00000361125,ENSP00000370473	APOB,APOE,FGF18,IGFBP3,IL6,MMP24,TGFB2,VEGFA
GO.0050900	leukocyte migration	4	0.0143	ENSP00000233242,ENSP00000258743,ENSP00000355896,ENSP00000361125	APOB,IL6,TGFB2,VEGFA
GO.0016043	cellular component organization	14	0.0147	ENSP00000216286,ENSP00000231061,ENSP00000233242,ENSP00000252486,ENSP00000258743,ENSP00000261590,ENSP00000267843,ENSP00000274341,ENSP00000313437,ENSP00000350425,ENSP00000355896,ENSP00000361125,ENSP00000363827,ENSP00000369889	APOA4,APOB,APOE,COL2A1,DSG2,FGF7,HAPLN1,HSPG2,IL6,MMP19,NID2,SPARC,TGFB2,VEGFA
GO.0043691	reverse cholesterol transport	2	0.0156	ENSP00000252486,ENSP00000350425	APOA4,APOE
GO.0060445	branching involved in salivary gland morphogenesis	2	0.0156	ENSP00000258743,ENSP00000267843	FGF7,IL6
GO.0051246	regulation of protein metabolic process	10	0.0157	ENSP00000241261,ENSP00000252486,ENSP00000258743,ENSP00000267843,ENSP00000274625,ENSP00000279804,ENSP00000287814,ENSP00000350425,ENSP00000355896,ENSP00000361125	APOA4,APOE,CTF1,FGF18,FGF7,IL6,TGFB2,TIMP4,TNFSF10,VEGFA
GO.0022604	regulation of cell morphogenesis	5	0.0162	ENSP00000231061,ENSP00000252486,ENSP00000258743,ENSP00000355896,ENSP00000361125	APOE,IL6,SPARC,TGFB2,VEGFA
GO.0032940	secretion by cell	5	0.0164	ENSP00000231061,ENSP00000258743,ENSP00000267843,ENSP00000355896,ENSP00000361125	FGF7,IL6,SPARC,TGFB2,VEGFA
GO.0030595	leukocyte chemotaxis	3	0.0172	ENSP00000258743,ENSP00000355896,ENSP00000361125	IL6,TGFB2,VEGFA
GO.0065008	regulation of biological quality	11	0.0172	ENSP00000231061,ENSP00000233242,ENSP00000252486,ENSP00000258743,ENSP00000261590,ENSP00000267843,ENSP00000350425,ENSP00000355896,ENSP00000361125,ENSP00000369889,ENSP00000379138	AFP,APOA4,APOB,APOE,COL2A1,DSG2,FGF7,IL6,SPARC,TGFB2,VEGFA
GO.0010243	response to organonitrogen compound	6	0.0176	ENSP00000231061,ENSP00000258743,ENSP00000267843,ENSP00000274625,ENSP00000287814,ENSP00000313437	FGF18,FGF7,IL6,MMP19,SPARC,TIMP4
GO.0033993	response to lipid	6	0.0176	ENSP00000231061,ENSP00000233242,ENSP00000258743,ENSP00000261590,ENSP00000287814,ENSP00000355896	APOB,DSG2,IL6,SPARC,TGFB2,TIMP4
GO.1901615	organic hydroxy compound metabolic process	5	0.0176	ENSP00000233242,ENSP00000252486,ENSP00000267843,ENSP00000350425,ENSP00000355896	APOA4,APOB,APOE,FGF7,TGFB2
GO.0009888	tissue development	8	0.0182	ENSP00000258743,ENSP00000261590,ENSP00000274625,ENSP00000347665,ENSP00000355896,ENSP00000361125,ENSP00000363827,ENSP00000369889	COL18A1,COL2A1,DSG2,FGF18,HSPG2,IL6,TGFB2,VEGFA
GO.1904037	positive regulation of epithelial cell apoptotic process	2	0.0182	ENSP00000258743,ENSP00000347665	COL18A1,IL6
GO.0014070	response to organic cyclic compound	6	0.0186	ENSP00000231061,ENSP00000258743,ENSP00000261590,ENSP00000313437,ENSP00000350425,ENSP00000355896	APOA4,DSG2,IL6,MMP19,SPARC,TGFB2
GO.0048666	neuron development	6	0.0191	ENSP00000252486,ENSP00000258743,ENSP00000279804,ENSP00000350425,ENSP00000361125,ENSP00000369889	APOA4,APOE,COL2A1,CTF1,IL6,VEGFA
GO.0051043	regulation of membrane protein ectodomain proteolysis	2	0.0198	ENSP00000252486,ENSP00000287814	APOE,TIMP4
GO.0001932	regulation of protein phosphorylation	7	0.0207	ENSP00000252486,ENSP00000258743,ENSP00000267843,ENSP00000274625,ENSP00000279804,ENSP00000355896,ENSP00000361125	APOE,CTF1,FGF18,FGF7,IL6,TGFB2,VEGFA
GO.0022411	cellular component disassembly	5	0.0207	ENSP00000261590,ENSP00000313437,ENSP00000347665,ENSP00000363827,ENSP00000369889	COL18A1,COL2A1,DSG2,HSPG2,MMP19
GO.0032496	response to lipopolysaccharide	4	0.0207	ENSP00000231061,ENSP00000233242,ENSP00000258743,ENSP00000287814	APOB,IL6,SPARC,TIMP4
GO.0060249	anatomical structure homeostasis	4	0.0207	ENSP00000258743,ENSP00000267843,ENSP00000361125,ENSP00000369889	COL2A1,FGF7,IL6,VEGFA
GO.0034381	plasma lipoprotein particle clearance	2	0.0208	ENSP00000233242,ENSP00000252486	APOB,APOE
GO.0008203	cholesterol metabolic process	3	0.0213	ENSP00000233242,ENSP00000252486,ENSP00000350425	APOA4,APOB,APOE
GO.0043086	negative regulation of catalytic activity	6	0.0213	ENSP00000241261,ENSP00000252486,ENSP00000258743,ENSP00000287814,ENSP00000355896,ENSP00000361125	APOE,IL6,TGFB2,TIMP4,TNFSF10,VEGFA
GO.0046165	alcohol biosynthetic process	3	0.0216	ENSP00000252486,ENSP00000267843,ENSP00000350425	APOA4,APOE,FGF7
GO.0050921	positive regulation of chemotaxis	3	0.0216	ENSP00000258743,ENSP00000274625,ENSP00000361125	FGF18,IL6,VEGFA
GO.0001502	cartilage condensation	2	0.022	ENSP00000355896,ENSP00000369889	COL2A1,TGFB2
GO.0050793	regulation of developmental process	9	0.0222	ENSP00000231061,ENSP00000233242,ENSP00000246186,ENSP00000252486,ENSP00000258743,ENSP00000274625,ENSP00000355896,ENSP00000361125,ENSP00000370473	APOB,APOE,FGF18,IGFBP3,IL6,MMP24,SPARC,TGFB2,VEGFA
GO.0042221	response to chemical	12	0.0228	ENSP00000231061,ENSP00000233242,ENSP00000252486,ENSP00000258743,ENSP00000261590,ENSP00000267843,ENSP00000274625,ENSP00000313437,ENSP00000347665,ENSP00000355896,ENSP00000361125,ENSP00000379138	AFP,APOB,APOE,COL18A1,DSG2,FGF18,FGF7,IL6,MMP19,SPARC,TGFB2,VEGFA
GO.0048878	chemical homeostasis	6	0.0229	ENSP00000233242,ENSP00000252486,ENSP00000258743,ENSP00000267843,ENSP00000350425,ENSP00000361125	APOA4,APOB,APOE,FGF7,IL6,VEGFA
GO.0050680	negative regulation of epithelial cell proliferation	3	0.0231	ENSP00000231061,ENSP00000252486,ENSP00000355896	APOE,SPARC,TGFB2
GO.0007596	blood coagulation	5	0.0233	ENSP00000231061,ENSP00000233242,ENSP00000258743,ENSP00000355896,ENSP00000361125	APOB,IL6,SPARC,TGFB2,VEGFA
GO.0046890	regulation of lipid biosynthetic process	3	0.0234	ENSP00000233242,ENSP00000252486,ENSP00000350425	APOA4,APOB,APOE
GO.0001101	response to acid chemical	4	0.0257	ENSP00000231061,ENSP00000233242,ENSP00000258743,ENSP00000347665	APOB,COL18A1,IL6,SPARC
GO.0044712	single-organism catabolic process	6	0.0267	ENSP00000233242,ENSP00000252486,ENSP00000313437,ENSP00000347665,ENSP00000350425,ENSP00000369889	APOA4,APOB,APOE,COL18A1,COL2A1,MMP19
GO.0031102	neuron projection regeneration	2	0.0269	ENSP00000252486,ENSP00000350425	APOA4,APOE
GO.0046486	glycerolipid metabolic process	4	0.0279	ENSP00000233242,ENSP00000252486,ENSP00000267843,ENSP00000350425	APOA4,APOB,APOE,FGF7
GO.0060351	cartilage development involved in endochondral bone morphogenesis	2	0.0286	ENSP00000363827,ENSP00000369889	COL2A1,HSPG2
GO.0002251	organ or tissue specific immune response	2	0.0305	ENSP00000258743,ENSP00000350425	APOA4,IL6
GO.0030823	regulation of cGMP metabolic process	2	0.0305	ENSP00000252486,ENSP00000361125	APOE,VEGFA
GO.0051781	positive regulation of cell division	3	0.0305	ENSP00000267843,ENSP00000355896,ENSP00000361125	FGF7,TGFB2,VEGFA
GO.0035295	tube development	5	0.0307	ENSP00000231061,ENSP00000267843,ENSP00000274625,ENSP00000355896,ENSP00000361125	FGF18,FGF7,SPARC,TGFB2,VEGFA
GO.0051716	cellular response to stimulus	15	0.0307	ENSP00000231061,ENSP00000241261,ENSP00000252486,ENSP00000258743,ENSP00000267843,ENSP00000274341,ENSP00000274625,ENSP00000279804,ENSP00000301464,ENSP00000350425,ENSP00000355896,ENSP00000361125,ENSP00000363827,ENSP00000369889,ENSP00000379138	AFP,APOA4,APOE,COL2A1,CTF1,FGF18,FGF7,HAPLN1,HSPG2,IGFBP6,IL6,SPARC,TGFB2,TNFSF10,VEGFA
GO.0007167	enzyme linked receptor protein signaling pathway	6	0.0324	ENSP00000267843,ENSP00000274625,ENSP00000279804,ENSP00000355896,ENSP00000361125,ENSP00000379138	AFP,CTF1,FGF18,FGF7,TGFB2,VEGFA
GO.0010942	positive regulation of cell death	5	0.0324	ENSP00000241261,ENSP00000252486,ENSP00000258743,ENSP00000347665,ENSP00000370473	APOE,COL18A1,IGFBP3,IL6,TNFSF10
GO.0048583	regulation of response to stimulus	11	0.0328	ENSP00000241261,ENSP00000252486,ENSP00000258743,ENSP00000267843,ENSP00000274341,ENSP00000279804,ENSP00000301464,ENSP00000355896,ENSP00000357980,ENSP00000361125,ENSP00000369889	APOE,COL2A1,CTF1,FGF7,HAPLN1,HTRA1,IGFBP6,IL6,TGFB2,TNFSF10,VEGFA
GO.1901654	response to ketone	3	0.0328	ENSP00000258743,ENSP00000261590,ENSP00000355896	DSG2,IL6,TGFB2
GO.0070374	positive regulation of ERK1 and ERK2 cascade	3	0.0334	ENSP00000258743,ENSP00000274625,ENSP00000361125	FGF18,IL6,VEGFA
GO.0032268	regulation of cellular protein metabolic process	9	0.0358	ENSP00000241261,ENSP00000252486,ENSP00000258743,ENSP00000267843,ENSP00000274625,ENSP00000279804,ENSP00000287814,ENSP00000355896,ENSP00000361125	APOE,CTF1,FGF18,FGF7,IL6,TGFB2,TIMP4,TNFSF10,VEGFA
GO.0001937	negative regulation of endothelial cell proliferation	2	0.0373	ENSP00000231061,ENSP00000252486	APOE,SPARC
GO.0031069	hair follicle morphogenesis	2	0.0373	ENSP00000267843,ENSP00000355896	FGF7,TGFB2
GO.0031099	regeneration	3	0.0373	ENSP00000252486,ENSP00000350425,ENSP00000379138	AFP,APOA4,APOE
GO.0031325	positive regulation of cellular metabolic process	10	0.0373	ENSP00000241261,ENSP00000252486,ENSP00000258743,ENSP00000274341,ENSP00000274625,ENSP00000279804,ENSP00000350425,ENSP00000355896,ENSP00000361125,ENSP00000370473	APOA4,APOE,CTF1,FGF18,HAPLN1,IGFBP3,IL6,TGFB2,TNFSF10,VEGFA
GO.0042517	positive regulation of tyrosine phosphorylation of Stat3 protein	2	0.0373	ENSP00000258743,ENSP00000279804	CTF1,IL6
GO.0070887	cellular response to chemical stimulus	9	0.0373	ENSP00000231061,ENSP00000233242,ENSP00000258743,ENSP00000267843,ENSP00000274625,ENSP00000350425,ENSP00000355896,ENSP00000361125,ENSP00000369889	APOA4,APOB,COL2A1,FGF18,FGF7,IL6,SPARC,TGFB2,VEGFA
GO.0007155	cell adhesion	6	0.0382	ENSP00000246186,ENSP00000258743,ENSP00000261590,ENSP00000274341,ENSP00000347665,ENSP00000350425	APOA4,COL18A1,DSG2,HAPLN1,IL6,MMP24
GO.0006066	alcohol metabolic process	4	0.0392	ENSP00000233242,ENSP00000252486,ENSP00000267843,ENSP00000350425	APOA4,APOB,APOE,FGF7
GO.0010646	regulation of cell communication	10	0.0393	ENSP00000241261,ENSP00000252486,ENSP00000258743,ENSP00000274341,ENSP00000279804,ENSP00000301464,ENSP00000355896,ENSP00000357980,ENSP00000361125,ENSP00000369889	APOE,COL2A1,CTF1,HAPLN1,HTRA1,IGFBP6,IL6,TGFB2,TNFSF10,VEGFA
GO.0030182	neuron differentiation	6	0.0397	ENSP00000252486,ENSP00000258743,ENSP00000279804,ENSP00000350425,ENSP00000361125,ENSP00000369889	APOA4,APOE,COL2A1,CTF1,IL6,VEGFA
GO.0042981	regulation of apoptotic process	7	0.0398	ENSP00000241261,ENSP00000252486,ENSP00000258743,ENSP00000347665,ENSP00000361125,ENSP00000369889,ENSP00000370473	APOE,COL18A1,COL2A1,IGFBP3,IL6,TNFSF10,VEGFA
GO.0014074	response to purine-containing compound	3	0.0409	ENSP00000231061,ENSP00000258743,ENSP00000313437	IL6,MMP19,SPARC
GO.0071310	cellular response to organic substance	8	0.0425	ENSP00000231061,ENSP00000233242,ENSP00000258743,ENSP00000267843,ENSP00000274625,ENSP00000355896,ENSP00000361125,ENSP00000369889	APOB,COL2A1,FGF18,FGF7,IL6,SPARC,TGFB2,VEGFA
GO.0048730	epidermis morphogenesis	2	0.0426	ENSP00000267843,ENSP00000355896	FGF7,TGFB2
GO.0009893	positive regulation of metabolic process	11	0.0447	ENSP00000233242,ENSP00000241261,ENSP00000246186,ENSP00000252486,ENSP00000258743,ENSP00000274341,ENSP00000274625,ENSP00000279804,ENSP00000350425,ENSP00000355896,ENSP00000361125	APOA4,APOB,APOE,CTF1,FGF18,HAPLN1,IL6,MMP24,TGFB2,TNFSF10,VEGFA
GO.0050918	positive chemotaxis	2	0.0448	ENSP00000267843,ENSP00000361125	FGF7,VEGFA
GO.0080134	regulation of response to stress	7	0.045	ENSP00000252486,ENSP00000258743,ENSP00000267843,ENSP00000274341,ENSP00000355896,ENSP00000357980,ENSP00000361125	APOE,FGF7,HAPLN1,HTRA1,IL6,TGFB2,VEGFA
GO.2001236	regulation of extrinsic apoptotic signaling pathway	3	0.0465	ENSP00000241261,ENSP00000355896,ENSP00000369889	COL2A1,TGFB2,TNFSF10
GO.0032103	positive regulation of response to external stimulus	4	0.0469	ENSP00000258743,ENSP00000274341,ENSP00000274625,ENSP00000361125	FGF18,HAPLN1,IL6,VEGFA
GO.0071495	cellular response to endogenous stimulus	6	0.0469	ENSP00000233242,ENSP00000258743,ENSP00000267843,ENSP00000274625,ENSP00000355896,ENSP00000369889	APOB,COL2A1,FGF18,FGF7,IL6,TGFB2
GO.0009966	regulation of signal transduction	9	0.0476	ENSP00000241261,ENSP00000252486,ENSP00000258743,ENSP00000279804,ENSP00000301464,ENSP00000355896,ENSP00000357980,ENSP00000361125,ENSP00000369889	APOE,COL2A1,CTF1,HTRA1,IGFBP6,IL6,TGFB2,TNFSF10,VEGFA
GO.0097164	ammonium ion metabolic process	3	0.0476	ENSP00000267843,ENSP00000350425,ENSP00000355896	APOA4,FGF7,TGFB2
GO.0006695	cholesterol biosynthetic process	2	0.0484	ENSP00000252486,ENSP00000350425	APOA4,APOE
GO.0032570	response to progesterone	2	0.0484	ENSP00000261590,ENSP00000355896	DSG2,TGFB2
GO.0008283	cell proliferation	5	0.0497	ENSP00000258743,ENSP00000267843,ENSP00000279804,ENSP00000355896,ENSP00000370473	CTF1,FGF7,IGFBP3,IL6,TGFB2
GO.0010883	regulation of lipid storage	2	0.0499	ENSP00000233242,ENSP00000258743	APOB,IL6
GO.0030199	collagen fibril organization	2	0.0499	ENSP00000355896,ENSP00000369889	COL2A1,TGFB2
GO.0032374	regulation of cholesterol transport	2	0.0499	ENSP00000252486,ENSP00000350425	APOA4,APOE

## Sheet: downCMd8xCMd4
#pathway ID	pathway description	observed gene count	false discovery rate	matching proteins in your network (IDs)	matching proteins in your network (labels)
GO.0071822	protein complex subunit organization	11	0.0112	ENSP00000252699,ENSP00000296511,ENSP00000299218,ENSP00000335153,ENSP00000338934,ENSP00000350894,ENSP00000351777,ENSP00000362744,ENSP00000379888,ENSP00000428340,ENSP00000433821	ACTN4,ANGPT1,ANXA5,CAND1,EZR,HSP90AA1,RPS3,RPS4X,RPS8,SERPINH1,VCP
GO.0042060	wound healing	8	0.0145	ENSP00000052754,ENSP00000211998,ENSP00000252699,ENSP00000296511,ENSP00000320171,ENSP00000355785,ENSP00000367123,ENSP00000428340	ACTN4,ANGPT1,ANXA5,DCN,LEFTY2,PKM,SLC3A2,VCL
GO.0008104	protein localization	10	0.0307	ENSP00000211998,ENSP00000252699,ENSP00000335153,ENSP00000338934,ENSP00000351777,ENSP00000362744,ENSP00000369538,ENSP00000379888,ENSP00000428340,ENSP00000433821	ACTN4,ANGPT1,EZR,GDI2,HSP90AA1,RPS3,RPS4X,RPS8,VCL,VCP
GO.0016032	viral process	7	0.0307	ENSP00000311121,ENSP00000325875,ENSP00000351777,ENSP00000362744,ENSP00000379888,ENSP00000426909,ENSP00000433821	GNB2L1,HSP90AB1,PSMA8,RPS3,RPS4X,RPS8,VCP
GO.0019058	viral life cycle	5	0.0307	ENSP00000325875,ENSP00000351777,ENSP00000362744,ENSP00000379888,ENSP00000433821	HSP90AB1,RPS3,RPS4X,RPS8,VCP
GO.0031329	regulation of cellular catabolic process	7	0.0307	ENSP00000052754,ENSP00000296511,ENSP00000311121,ENSP00000325875,ENSP00000338934,ENSP00000351777,ENSP00000426909	ANXA5,DCN,EZR,GNB2L1,HSP90AB1,PSMA8,VCP
GO.0031331	positive regulation of cellular catabolic process	6	0.0307	ENSP00000052754,ENSP00000296511,ENSP00000311121,ENSP00000338934,ENSP00000351777,ENSP00000426909	ANXA5,DCN,EZR,GNB2L1,PSMA8,VCP
GO.0033036	macromolecule localization	11	0.0307	ENSP00000211998,ENSP00000252699,ENSP00000335153,ENSP00000338934,ENSP00000351777,ENSP00000362744,ENSP00000362817,ENSP00000369538,ENSP00000379888,ENSP00000428340,ENSP00000433821	ACTN4,ANGPT1,EZR,FABP3,GDI2,HSP90AA1,RPS3,RPS4X,RPS8,VCL,VCP
GO.0044711	single-organism biosynthetic process	9	0.0307	ENSP00000052754,ENSP00000217426,ENSP00000320171,ENSP00000338703,ENSP00000350894,ENSP00000351777,ENSP00000365773,ENSP00000368438,ENSP00000428340	AHCY,ANGPT1,DCN,PCNA,PKM,PSAT1,SERPINH1,UGP2,VCP
GO.0046394	carboxylic acid biosynthetic process	5	0.0307	ENSP00000052754,ENSP00000217426,ENSP00000320171,ENSP00000338703,ENSP00000365773	AHCY,DCN,PKM,PSAT1,UGP2
GO.0006986	response to unfolded protein	4	0.0313	ENSP00000325875,ENSP00000335153,ENSP00000350894,ENSP00000351777	HSP90AA1,HSP90AB1,SERPINH1,VCP
GO.0007596	blood coagulation	6	0.0313	ENSP00000211998,ENSP00000252699,ENSP00000296511,ENSP00000355785,ENSP00000367123,ENSP00000428340	ACTN4,ANGPT1,ANXA5,LEFTY2,SLC3A2,VCL
GO.0009056	catabolic process	10	0.0313	ENSP00000052754,ENSP00000217426,ENSP00000262746,ENSP00000311121,ENSP00000320171,ENSP00000351777,ENSP00000362744,ENSP00000362817,ENSP00000379888,ENSP00000433821	AHCY,DCN,FABP3,PKM,PRDX1,PSMA8,RPS3,RPS4X,RPS8,VCP
GO.0016192	vesicle-mediated transport	8	0.0313	ENSP00000211998,ENSP00000252699,ENSP00000325875,ENSP00000335153,ENSP00000338934,ENSP00000351777,ENSP00000355785,ENSP00000369538	ACTN4,EZR,GDI2,HSP90AA1,HSP90AB1,LEFTY2,VCL,VCP
GO.0034613	cellular protein localization	8	0.0313	ENSP00000211998,ENSP00000335153,ENSP00000338934,ENSP00000351777,ENSP00000362744,ENSP00000379888,ENSP00000428340,ENSP00000433821	ANGPT1,EZR,HSP90AA1,RPS3,RPS4X,RPS8,VCL,VCP
GO.0042221	response to chemical	14	0.0313	ENSP00000052754,ENSP00000296511,ENSP00000320171,ENSP00000335153,ENSP00000338703,ENSP00000338934,ENSP00000350894,ENSP00000351777,ENSP00000355785,ENSP00000362817,ENSP00000363081,ENSP00000367123,ENSP00000368438,ENSP00000428340	ANGPT1,ANXA5,DCN,DKK1,EZR,FABP3,HSP90AA1,LEFTY2,PCNA,PKM,SERPINH1,SLC3A2,UGP2,VCP
GO.0044248	cellular catabolic process	9	0.0313	ENSP00000052754,ENSP00000217426,ENSP00000262746,ENSP00000311121,ENSP00000351777,ENSP00000362744,ENSP00000362817,ENSP00000379888,ENSP00000433821	AHCY,DCN,FABP3,PRDX1,PSMA8,RPS3,RPS4X,RPS8,VCP
GO.0050790	regulation of catalytic activity	11	0.0313	ENSP00000296511,ENSP00000299218,ENSP00000311121,ENSP00000335153,ENSP00000350894,ENSP00000351777,ENSP00000368438,ENSP00000369538,ENSP00000426909,ENSP00000428340,ENSP00000433821	ANGPT1,ANXA5,CAND1,GDI2,GNB2L1,HSP90AA1,PCNA,PSMA8,RPS3,SERPINH1,VCP
GO.0065009	regulation of molecular function	12	0.0313	ENSP00000252699,ENSP00000296511,ENSP00000299218,ENSP00000311121,ENSP00000335153,ENSP00000350894,ENSP00000351777,ENSP00000363081,ENSP00000368438,ENSP00000369538,ENSP00000426909,ENSP00000433821	ACTN4,ANXA5,CAND1,DKK1,GDI2,GNB2L1,HSP90AA1,PCNA,PSMA8,RPS3,SERPINH1,VCP
GO.0071702	organic substance transport	10	0.0313	ENSP00000252699,ENSP00000335153,ENSP00000338934,ENSP00000351777,ENSP00000362744,ENSP00000362817,ENSP00000367123,ENSP00000369538,ENSP00000379888,ENSP00000433821	ACTN4,EZR,FABP3,GDI2,HSP90AA1,RPS3,RPS4X,RPS8,SLC3A2,VCP
GO.1903362	regulation of cellular protein catabolic process	5	0.0313	ENSP00000311121,ENSP00000325875,ENSP00000338934,ENSP00000351777,ENSP00000426909	EZR,GNB2L1,HSP90AB1,PSMA8,VCP
GO.1903364	positive regulation of cellular protein catabolic process	4	0.0313	ENSP00000311121,ENSP00000338934,ENSP00000351777,ENSP00000426909	EZR,GNB2L1,PSMA8,VCP
GO.1901575	organic substance catabolic process	9	0.0333	ENSP00000052754,ENSP00000217426,ENSP00000311121,ENSP00000320171,ENSP00000351777,ENSP00000362744,ENSP00000362817,ENSP00000379888,ENSP00000433821	AHCY,DCN,FABP3,PKM,PSMA8,RPS3,RPS4X,RPS8,VCP
GO.0031325	positive regulation of cellular metabolic process	12	0.035	ENSP00000052754,ENSP00000296511,ENSP00000299218,ENSP00000311121,ENSP00000335153,ENSP00000338934,ENSP00000351777,ENSP00000355785,ENSP00000362817,ENSP00000368438,ENSP00000426909,ENSP00000433821	ANXA5,CAND1,DCN,EZR,FABP3,GNB2L1,HSP90AA1,LEFTY2,PCNA,PSMA8,RPS3,VCP
GO.0030100	regulation of endocytosis	4	0.0441	ENSP00000252699,ENSP00000363081,ENSP00000426909,ENSP00000428340	ACTN4,ANGPT1,DKK1,GNB2L1
GO.0006950	response to stress	13	0.046	ENSP00000052754,ENSP00000211998,ENSP00000217426,ENSP00000296511,ENSP00000311121,ENSP00000320171,ENSP00000350894,ENSP00000351777,ENSP00000355785,ENSP00000367123,ENSP00000368438,ENSP00000428340,ENSP00000433821	AHCY,ANGPT1,ANXA5,DCN,LEFTY2,PCNA,PKM,PSMA8,RPS3,SERPINH1,SLC3A2,VCL,VCP
GO.0010033	response to organic substance	11	0.0479	ENSP00000052754,ENSP00000296511,ENSP00000320171,ENSP00000335153,ENSP00000350894,ENSP00000351777,ENSP00000355785,ENSP00000362817,ENSP00000363081,ENSP00000367123,ENSP00000368438	ANXA5,DCN,DKK1,FABP3,HSP90AA1,LEFTY2,PCNA,PKM,SERPINH1,SLC3A2,VCP
GO.0060627	regulation of vesicle-mediated transport	5	0.05	ENSP00000252699,ENSP00000338934,ENSP00000363081,ENSP00000426909,ENSP00000428340	ACTN4,ANGPT1,DKK1,EZR,GNB2L1

## Sheet: upCMd15xDMd8
#pathway ID	pathway description	observed gene count	false discovery rate	matching proteins in your network (IDs)	matching proteins in your network (labels)
GO.0050731	positive regulation of peptidyl-tyrosine phosphorylation	5	0.000827	ENSP00000258743,ENSP00000267843,ENSP00000361125,ENSP00000391826,ENSP00000428340	ANGPT1,FGF7,IGF2,IL6,VEGFA
GO.0042060	wound healing	7	0.000852	ENSP00000052754,ENSP00000258743,ENSP00000267843,ENSP00000320171,ENSP00000361125,ENSP00000391826,ENSP00000428340	ANGPT1,DCN,FGF7,IGF2,IL6,PKM,VEGFA
GO.0048732	gland development	6	0.000852	ENSP00000258743,ENSP00000267843,ENSP00000320171,ENSP00000361125,ENSP00000379138,ENSP00000391826	AFP,FGF7,IGF2,IL6,PKM,VEGFA
GO.0009887	organ morphogenesis	7	0.00198	ENSP00000052754,ENSP00000258743,ENSP00000267843,ENSP00000347665,ENSP00000361125,ENSP00000363827,ENSP00000391826	COL18A1,DCN,FGF7,HSPG2,IGF2,IL6,VEGFA
GO.0042127	regulation of cell proliferation	8	0.00332	ENSP00000258743,ENSP00000267843,ENSP00000295666,ENSP00000301464,ENSP00000361125,ENSP00000370473,ENSP00000391826,ENSP00000428340	ANGPT1,FGF7,IGF2,IGFBP3,IGFBP6,IGFBP7,IL6,VEGFA
GO.0030334	regulation of cell migration	6	0.00341	ENSP00000258743,ENSP00000267843,ENSP00000347665,ENSP00000361125,ENSP00000370473,ENSP00000428340	ANGPT1,COL18A1,FGF7,IGFBP3,IL6,VEGFA
GO.0030335	positive regulation of cell migration	5	0.00351	ENSP00000258743,ENSP00000267843,ENSP00000347665,ENSP00000361125,ENSP00000428340	ANGPT1,COL18A1,FGF7,IL6,VEGFA
GO.0050918	positive chemotaxis	3	0.00351	ENSP00000267843,ENSP00000361125,ENSP00000428340	ANGPT1,FGF7,VEGFA
GO.0035272	exocrine system development	3	0.00381	ENSP00000258743,ENSP00000267843,ENSP00000391826	FGF7,IGF2,IL6
GO.1904035	regulation of epithelial cell apoptotic process	3	0.00467	ENSP00000258743,ENSP00000347665,ENSP00000428340	ANGPT1,COL18A1,IL6
GO.0009611	response to wounding	6	0.00482	ENSP00000052754,ENSP00000258743,ENSP00000320171,ENSP00000361125,ENSP00000391826,ENSP00000428340	ANGPT1,DCN,IGF2,IL6,PKM,VEGFA
GO.0043410	positive regulation of MAPK cascade	5	0.00492	ENSP00000258743,ENSP00000361125,ENSP00000370473,ENSP00000391826,ENSP00000428340	ANGPT1,IGF2,IGFBP3,IL6,VEGFA
GO.0031016	pancreas development	3	0.0153	ENSP00000258743,ENSP00000379138,ENSP00000391826	AFP,IGF2,IL6
GO.0051128	regulation of cellular component organization	8	0.0153	ENSP00000241261,ENSP00000258743,ENSP00000295666,ENSP00000301464,ENSP00000361125,ENSP00000370473,ENSP00000391826,ENSP00000428340	ANGPT1,IGF2,IGFBP3,IGFBP6,IGFBP7,IL6,TNFSF10,VEGFA
GO.0051897	positive regulation of protein kinase B signaling	3	0.0153	ENSP00000258743,ENSP00000391826,ENSP00000428340	ANGPT1,IGF2,IL6
GO.0022602	ovulation cycle process	3	0.0158	ENSP00000267843,ENSP00000361125,ENSP00000379138	AFP,FGF7,VEGFA
GO.0043129	surfactant homeostasis	2	0.0158	ENSP00000267843,ENSP00000361125	FGF7,VEGFA
GO.0032868	response to insulin	4	0.0167	ENSP00000258743,ENSP00000267843,ENSP00000320171,ENSP00000391826	FGF7,IGF2,IL6,PKM
GO.0008585	female gonad development	3	0.0168	ENSP00000267843,ENSP00000361125,ENSP00000379138	AFP,FGF7,VEGFA
GO.0010634	positive regulation of epithelial cell migration	3	0.0168	ENSP00000267843,ENSP00000361125,ENSP00000428340	ANGPT1,FGF7,VEGFA
GO.0033138	positive regulation of peptidyl-serine phosphorylation	3	0.0168	ENSP00000258743,ENSP00000361125,ENSP00000428340	ANGPT1,IL6,VEGFA
GO.0043154	negative regulation of cysteine-type endopeptidase activity involved in apoptotic process	3	0.0168	ENSP00000241261,ENSP00000258743,ENSP00000361125	IL6,TNFSF10,VEGFA
GO.0010906	regulation of glucose metabolic process	3	0.0172	ENSP00000258743,ENSP00000370473,ENSP00000391826	IGF2,IGFBP3,IL6
GO.0001525	angiogenesis	4	0.0181	ENSP00000347665,ENSP00000361125,ENSP00000363827,ENSP00000428340	ANGPT1,COL18A1,HSPG2,VEGFA
GO.0046545	development of primary female sexual characteristics	3	0.0181	ENSP00000267843,ENSP00000361125,ENSP00000379138	AFP,FGF7,VEGFA
GO.0042698	ovulation cycle	3	0.0184	ENSP00000267843,ENSP00000361125,ENSP00000379138	AFP,FGF7,VEGFA
GO.0006024	glycosaminoglycan biosynthetic process	3	0.0186	ENSP00000052754,ENSP00000363827,ENSP00000428340	ANGPT1,DCN,HSPG2
GO.0008285	negative regulation of cell proliferation	5	0.0186	ENSP00000258743,ENSP00000295666,ENSP00000301464,ENSP00000347665,ENSP00000370473	COL18A1,IGFBP3,IGFBP6,IGFBP7,IL6
GO.0009628	response to abiotic stimulus	6	0.0186	ENSP00000052754,ENSP00000258743,ENSP00000320171,ENSP00000347665,ENSP00000361125,ENSP00000363827	COL18A1,DCN,HSPG2,IL6,PKM,VEGFA
GO.0022617	extracellular matrix disassembly	3	0.0212	ENSP00000052754,ENSP00000347665,ENSP00000363827	COL18A1,DCN,HSPG2
GO.0045785	positive regulation of cell adhesion	4	0.0212	ENSP00000258743,ENSP00000361125,ENSP00000391826,ENSP00000428340	ANGPT1,IGF2,IL6,VEGFA
GO.0046660	female sex differentiation	3	0.0212	ENSP00000267843,ENSP00000361125,ENSP00000379138	AFP,FGF7,VEGFA
GO.0060445	branching involved in salivary gland morphogenesis	2	0.0212	ENSP00000258743,ENSP00000267843	FGF7,IL6
GO.0001558	regulation of cell growth	4	0.0249	ENSP00000295666,ENSP00000301464,ENSP00000361125,ENSP00000370473	IGFBP3,IGFBP6,IGFBP7,VEGFA
GO.1904037	positive regulation of epithelial cell apoptotic process	2	0.0249	ENSP00000258743,ENSP00000347665	COL18A1,IL6
GO.0009605	response to external stimulus	7	0.0266	ENSP00000052754,ENSP00000258743,ENSP00000267843,ENSP00000320171,ENSP00000361125,ENSP00000363827,ENSP00000428340	ANGPT1,DCN,FGF7,HSPG2,IL6,PKM,VEGFA
GO.0034394	protein localization to cell surface	2	0.0266	ENSP00000267843,ENSP00000428340	ANGPT1,FGF7
GO.0051781	positive regulation of cell division	3	0.0266	ENSP00000267843,ENSP00000361125,ENSP00000391826	FGF7,IGF2,VEGFA
GO.0002092	positive regulation of receptor internalization	2	0.0288	ENSP00000361125,ENSP00000428340	ANGPT1,VEGFA
GO.0043536	positive regulation of blood vessel endothelial cell migration	2	0.0288	ENSP00000361125,ENSP00000428340	ANGPT1,VEGFA
GO.0048514	blood vessel morphogenesis	4	0.0288	ENSP00000347665,ENSP00000361125,ENSP00000363827,ENSP00000428340	ANGPT1,COL18A1,HSPG2,VEGFA
GO.0070374	positive regulation of ERK1 and ERK2 cascade	3	0.0288	ENSP00000258743,ENSP00000361125,ENSP00000428340	ANGPT1,IL6,VEGFA
GO.0032270	positive regulation of cellular protein metabolic process	6	0.0298	ENSP00000241261,ENSP00000258743,ENSP00000267843,ENSP00000361125,ENSP00000370473,ENSP00000391826	FGF7,IGF2,IGFBP3,IL6,TNFSF10,VEGFA
GO.0001934	positive regulation of protein phosphorylation	5	0.0323	ENSP00000258743,ENSP00000267843,ENSP00000361125,ENSP00000370473,ENSP00000391826	FGF7,IGF2,IGFBP3,IL6,VEGFA
GO.0008284	positive regulation of cell proliferation	5	0.0323	ENSP00000258743,ENSP00000267843,ENSP00000347665,ENSP00000361125,ENSP00000391826	COL18A1,FGF7,IGF2,IL6,VEGFA
GO.1901700	response to oxygen-containing compound	6	0.0323	ENSP00000052754,ENSP00000258743,ENSP00000267843,ENSP00000320171,ENSP00000347665,ENSP00000391826	COL18A1,DCN,FGF7,IGF2,IL6,PKM
GO.0040007	growth	4	0.0326	ENSP00000258743,ENSP00000267843,ENSP00000320171,ENSP00000361125	FGF7,IL6,PKM,VEGFA
GO.0048608	reproductive structure development	4	0.0326	ENSP00000052754,ENSP00000267843,ENSP00000361125,ENSP00000379138	AFP,DCN,FGF7,VEGFA
GO.0050679	positive regulation of epithelial cell proliferation	3	0.0326	ENSP00000258743,ENSP00000267843,ENSP00000361125	FGF7,IL6,VEGFA
GO.1902533	positive regulation of intracellular signal transduction	5	0.0326	ENSP00000241261,ENSP00000258743,ENSP00000361125,ENSP00000370473,ENSP00000391826	IGF2,IGFBP3,IL6,TNFSF10,VEGFA
GO.0061458	reproductive system development	4	0.033	ENSP00000052754,ENSP00000267843,ENSP00000361125,ENSP00000379138	AFP,DCN,FGF7,VEGFA
GO.0007166	cell surface receptor signaling pathway	7	0.0335	ENSP00000241261,ENSP00000258743,ENSP00000267843,ENSP00000361125,ENSP00000379138,ENSP00000391826,ENSP00000428340	AFP,ANGPT1,FGF7,IGF2,IL6,TNFSF10,VEGFA
GO.0042221	response to chemical	9	0.0335	ENSP00000052754,ENSP00000258743,ENSP00000267843,ENSP00000320171,ENSP00000347665,ENSP00000361125,ENSP00000379138,ENSP00000391826,ENSP00000428340	AFP,ANGPT1,COL18A1,DCN,FGF7,IGF2,IL6,PKM,VEGFA
GO.0043114	regulation of vascular permeability	2	0.0335	ENSP00000361125,ENSP00000428340	ANGPT1,VEGFA
GO.0007435	salivary gland morphogenesis	2	0.035	ENSP00000258743,ENSP00000267843	FGF7,IL6
GO.0009653	anatomical structure morphogenesis	7	0.0355	ENSP00000052754,ENSP00000258743,ENSP00000267843,ENSP00000361125,ENSP00000363827,ENSP00000391826,ENSP00000428340	ANGPT1,DCN,FGF7,HSPG2,IGF2,IL6,VEGFA
GO.0001568	blood vessel development	4	0.039	ENSP00000347665,ENSP00000361125,ENSP00000363827,ENSP00000428340	ANGPT1,COL18A1,HSPG2,VEGFA
GO.0007431	salivary gland development	2	0.0408	ENSP00000258743,ENSP00000267843	FGF7,IL6
GO.0061138	morphogenesis of a branching epithelium	3	0.0423	ENSP00000258743,ENSP00000267843,ENSP00000361125	FGF7,IL6,VEGFA
GO.0001944	vasculature development	4	0.0439	ENSP00000347665,ENSP00000361125,ENSP00000363827,ENSP00000428340	ANGPT1,COL18A1,HSPG2,VEGFA
GO.0032940	secretion by cell	4	0.0439	ENSP00000258743,ENSP00000267843,ENSP00000361125,ENSP00000391826	FGF7,IGF2,IL6,VEGFA
GO.0007167	enzyme linked receptor protein signaling pathway	5	0.0443	ENSP00000267843,ENSP00000361125,ENSP00000379138,ENSP00000391826,ENSP00000428340	AFP,ANGPT1,FGF7,IGF2,VEGFA
GO.1901566	organonitrogen compound biosynthetic process	5	0.0492	ENSP00000052754,ENSP00000267843,ENSP00000320171,ENSP00000363827,ENSP00000428340	ANGPT1,DCN,FGF7,HSPG2,PKM
GO.0009888	tissue development	6	0.0493	ENSP00000052754,ENSP00000258743,ENSP00000320171,ENSP00000347665,ENSP00000361125,ENSP00000363827	COL18A1,DCN,HSPG2,IL6,PKM,VEGFA
GO.0032269	negative regulation of cellular protein metabolic process	5	0.0493	ENSP00000241261,ENSP00000258743,ENSP00000361125,ENSP00000370473,ENSP00000428340	ANGPT1,IGFBP3,IL6,TNFSF10,VEGFA

## Sheet: downCMd15xDMd8
#pathway ID	pathway description	observed gene count	false discovery rate	matching proteins in your network (IDs)	matching proteins in your network (labels)
GO.0002576	platelet degranulation	5	0.000931	ENSP00000225655,ENSP00000231061,ENSP00000315130,ENSP00000355785,ENSP00000419425	CLU,LEFTY2,PFN1,PPIA,SPARC
GO.0007596	blood coagulation	7	0.00379	ENSP00000225655,ENSP00000231061,ENSP00000315130,ENSP00000331544,ENSP00000355785,ENSP00000415786,ENSP00000419425	CLU,FBLN1,LEFTY2,PFN1,PPIA,SERPINE2,SPARC
GO.0030162	regulation of proteolysis	8	0.00379	ENSP00000252486,ENSP00000315130,ENSP00000325875,ENSP00000331544,ENSP00000357721,ENSP00000370074,ENSP00000415786,ENSP00000416561	APOE,CFB,CLU,FBLN1,HSP90AB1,S100A8,SERPINB9,SERPINE2
GO.0042060	wound healing	8	0.00379	ENSP00000225655,ENSP00000231061,ENSP00000315130,ENSP00000331544,ENSP00000355785,ENSP00000357721,ENSP00000415786,ENSP00000419425	CLU,FBLN1,LEFTY2,PFN1,PPIA,S100A8,SERPINE2,SPARC
GO.0065008	regulation of biological quality	14	0.00379	ENSP00000225655,ENSP00000231061,ENSP00000252486,ENSP00000262030,ENSP00000299198,ENSP00000315130,ENSP00000325875,ENSP00000331544,ENSP00000355785,ENSP00000357721,ENSP00000368438,ENSP00000370074,ENSP00000370297,ENSP00000419425	APOE,ATP5B,CER1,CKB,CLU,FBLN1,HSP90AB1,LEFTY2,PCNA,PFN1,PPIA,S100A8,SERPINB9,SPARC
GO.1902998	positive regulation of neurofibrillary tangle assembly	2	0.00379	ENSP00000252486,ENSP00000315130	APOE,CLU
GO.1902947	regulation of tau-protein kinase activity	2	0.00535	ENSP00000252486,ENSP00000315130	APOE,CLU
GO.0030168	platelet activation	5	0.00929	ENSP00000225655,ENSP00000231061,ENSP00000315130,ENSP00000355785,ENSP00000419425	CLU,LEFTY2,PFN1,PPIA,SPARC
GO.0008283	cell proliferation	7	0.00942	ENSP00000262746,ENSP00000262982,ENSP00000279804,ENSP00000302886,ENSP00000315130,ENSP00000368438,ENSP00000370297	CER1,CLU,CSE1L,CTF1,PA2G4,PCNA,PRDX1
GO.1902004	positive regulation of beta-amyloid formation	2	0.0126	ENSP00000252486,ENSP00000315130	APOE,CLU
GO.0080134	regulation of response to stress	9	0.0142	ENSP00000252486,ENSP00000262746,ENSP00000315130,ENSP00000325875,ENSP00000357721,ENSP00000368438,ENSP00000370074,ENSP00000415786,ENSP00000416561	APOE,CFB,CLU,HSP90AB1,PCNA,PRDX1,S100A8,SERPINB9,SERPINE2
GO.0048583	regulation of response to stimulus	13	0.0146	ENSP00000252486,ENSP00000262746,ENSP00000279804,ENSP00000315130,ENSP00000325875,ENSP00000331544,ENSP00000355785,ENSP00000357721,ENSP00000368438,ENSP00000370074,ENSP00000370297,ENSP00000415786,ENSP00000416561	APOE,CER1,CFB,CLU,CTF1,FBLN1,HSP90AB1,LEFTY2,PCNA,PRDX1,S100A8,SERPINB9,SERPINE2
GO.1900221	regulation of beta-amyloid clearance	2	0.0146	ENSP00000252486,ENSP00000315130	APOE,CLU
GO.1902430	negative regulation of beta-amyloid formation	2	0.0146	ENSP00000252486,ENSP00000315130	APOE,CLU
GO.0051246	regulation of protein metabolic process	11	0.0215	ENSP00000252486,ENSP00000262746,ENSP00000279804,ENSP00000302886,ENSP00000307940,ENSP00000315130,ENSP00000355785,ENSP00000357721,ENSP00000370074,ENSP00000415786,ENSP00000416561	APOE,CFB,CLU,CTF1,EEF2,LEFTY2,PA2G4,PRDX1,S100A8,SERPINB9,SERPINE2
GO.0007275	multicellular organismal development	14	0.0224	ENSP00000225655,ENSP00000231061,ENSP00000252486,ENSP00000262030,ENSP00000262746,ENSP00000299198,ENSP00000307940,ENSP00000315130,ENSP00000331544,ENSP00000355785,ENSP00000368438,ENSP00000370297,ENSP00000376176,ENSP00000415786	APOE,ATP5B,CER1,CKB,CLU,EEF2,FBLN1,LEFTY2,PCNA,PFN1,PRDX1,RAN,SERPINE2,SPARC
GO.0032270	positive regulation of cellular protein metabolic process	8	0.0382	ENSP00000252486,ENSP00000279804,ENSP00000307940,ENSP00000315130,ENSP00000325875,ENSP00000331544,ENSP00000355785,ENSP00000357721	APOE,CLU,CTF1,EEF2,FBLN1,HSP90AB1,LEFTY2,S100A8
GO.0072376	protein activation cascade	3	0.0382	ENSP00000315130,ENSP00000331544,ENSP00000416561	CFB,CLU,FBLN1
GO.0051649	establishment of localization in cell	9	0.0461	ENSP00000225655,ENSP00000231061,ENSP00000252486,ENSP00000262030,ENSP00000262982,ENSP00000315130,ENSP00000355785,ENSP00000376176,ENSP00000419425	APOE,ATP5B,CLU,CSE1L,LEFTY2,PFN1,PPIA,RAN,SPARC

## Sheet: upCMd15xDMd1
#pathway ID	pathway description	observed gene count	false discovery rate	matching proteins in your network (IDs)	matching proteins in your network (labels)
GO.0030198	extracellular matrix organization	11	6.89e-09	ENSP00000216286,ENSP00000231061,ENSP00000274341,ENSP00000313437,ENSP00000346839,ENSP00000347665,ENSP00000355180,ENSP00000355896,ENSP00000363827,ENSP00000369889,ENSP00000384169	COL18A1,COL2A1,COL6A1,FBLN2,FN1,HAPLN1,HSPG2,MMP19,NID2,SPARC,TGFB2
GO.0048514	blood vessel morphogenesis	10	2.61e-07	ENSP00000252486,ENSP00000274625,ENSP00000313437,ENSP00000346839,ENSP00000347665,ENSP00000355896,ENSP00000361125,ENSP00000363827,ENSP00000371790,ENSP00000428340	ANGPT1,APOE,COL18A1,FGF18,FGF9,FN1,HSPG2,MMP19,TGFB2,VEGFA
GO.0042127	regulation of cell proliferation	15	3.55e-07	ENSP00000231061,ENSP00000252486,ENSP00000258743,ENSP00000267843,ENSP00000274625,ENSP00000279804,ENSP00000295666,ENSP00000301464,ENSP00000346839,ENSP00000355896,ENSP00000357980,ENSP00000361125,ENSP00000370473,ENSP00000391826,ENSP00000428340	ANGPT1,APOE,CTF1,FGF18,FGF7,FN1,HTRA1,IGF2,IGFBP3,IGFBP6,IGFBP7,IL6,SPARC,TGFB2,VEGFA
GO.0001525	angiogenesis	9	3.72e-07	ENSP00000274625,ENSP00000313437,ENSP00000346839,ENSP00000347665,ENSP00000355896,ENSP00000361125,ENSP00000363827,ENSP00000371790,ENSP00000428340	ANGPT1,COL18A1,FGF18,FGF9,FN1,HSPG2,MMP19,TGFB2,VEGFA
GO.0030334	regulation of cell migration	11	3.72e-07	ENSP00000231061,ENSP00000252486,ENSP00000258743,ENSP00000267843,ENSP00000274625,ENSP00000346839,ENSP00000347665,ENSP00000355896,ENSP00000361125,ENSP00000370473,ENSP00000428340	ANGPT1,APOE,COL18A1,FGF18,FGF7,FN1,IGFBP3,IL6,SPARC,TGFB2,VEGFA
GO.0072358	cardiovascular system development	12	3.72e-07	ENSP00000231061,ENSP00000252486,ENSP00000274625,ENSP00000313437,ENSP00000346839,ENSP00000347665,ENSP00000355896,ENSP00000361125,ENSP00000363827,ENSP00000369889,ENSP00000371790,ENSP00000428340	ANGPT1,APOE,COL18A1,COL2A1,FGF18,FGF9,FN1,HSPG2,MMP19,SPARC,TGFB2,VEGFA
GO.0072359	circulatory system development	12	3.72e-07	ENSP00000231061,ENSP00000252486,ENSP00000274625,ENSP00000313437,ENSP00000346839,ENSP00000347665,ENSP00000355896,ENSP00000361125,ENSP00000363827,ENSP00000369889,ENSP00000371790,ENSP00000428340	ANGPT1,APOE,COL18A1,COL2A1,FGF18,FGF9,FN1,HSPG2,MMP19,SPARC,TGFB2,VEGFA
GO.0001568	blood vessel development	10	4.58e-07	ENSP00000252486,ENSP00000274625,ENSP00000313437,ENSP00000346839,ENSP00000347665,ENSP00000355896,ENSP00000361125,ENSP00000363827,ENSP00000371790,ENSP00000428340	ANGPT1,APOE,COL18A1,FGF18,FGF9,FN1,HSPG2,MMP19,TGFB2,VEGFA
GO.0001944	vasculature development	10	5.97e-07	ENSP00000252486,ENSP00000274625,ENSP00000313437,ENSP00000346839,ENSP00000347665,ENSP00000355896,ENSP00000361125,ENSP00000363827,ENSP00000371790,ENSP00000428340	ANGPT1,APOE,COL18A1,FGF18,FGF9,FN1,HSPG2,MMP19,TGFB2,VEGFA
GO.0030335	positive regulation of cell migration	9	6.89e-07	ENSP00000231061,ENSP00000258743,ENSP00000267843,ENSP00000274625,ENSP00000346839,ENSP00000347665,ENSP00000355896,ENSP00000361125,ENSP00000428340	ANGPT1,COL18A1,FGF18,FGF7,FN1,IL6,SPARC,TGFB2,VEGFA
GO.0010632	regulation of epithelial cell migration	7	1.11e-06	ENSP00000231061,ENSP00000252486,ENSP00000267843,ENSP00000274625,ENSP00000355896,ENSP00000361125,ENSP00000428340	ANGPT1,APOE,FGF18,FGF7,SPARC,TGFB2,VEGFA
GO.0001503	ossification	8	1.12e-06	ENSP00000231061,ENSP00000274625,ENSP00000355180,ENSP00000363827,ENSP00000369889,ENSP00000370473,ENSP00000371790,ENSP00000391826	COL2A1,COL6A1,FGF18,FGF9,HSPG2,IGF2,IGFBP3,SPARC
GO.0048646	anatomical structure formation involved in morphogenesis	12	1.67e-06	ENSP00000274625,ENSP00000313437,ENSP00000346839,ENSP00000347665,ENSP00000355180,ENSP00000355896,ENSP00000357980,ENSP00000361125,ENSP00000363827,ENSP00000369889,ENSP00000371790,ENSP00000428340	ANGPT1,COL18A1,COL2A1,COL6A1,FGF18,FGF9,FN1,HSPG2,HTRA1,MMP19,TGFB2,VEGFA
GO.0050678	regulation of epithelial cell proliferation	8	1.85e-06	ENSP00000231061,ENSP00000252486,ENSP00000258743,ENSP00000267843,ENSP00000355896,ENSP00000357980,ENSP00000361125,ENSP00000371790	APOE,FGF7,FGF9,HTRA1,IL6,SPARC,TGFB2,VEGFA
GO.0010634	positive regulation of epithelial cell migration	6	2.24e-06	ENSP00000231061,ENSP00000267843,ENSP00000274625,ENSP00000355896,ENSP00000361125,ENSP00000428340	ANGPT1,FGF18,FGF7,SPARC,TGFB2,VEGFA
GO.0043408	regulation of MAPK cascade	10	2.57e-06	ENSP00000252486,ENSP00000258743,ENSP00000274625,ENSP00000346839,ENSP00000355896,ENSP00000361125,ENSP00000370473,ENSP00000371790,ENSP00000391826,ENSP00000428340	ANGPT1,APOE,FGF18,FGF9,FN1,IGF2,IGFBP3,IL6,TGFB2,VEGFA
GO.1901700	response to oxygen-containing compound	13	2.83e-06	ENSP00000231061,ENSP00000252486,ENSP00000258743,ENSP00000267843,ENSP00000274625,ENSP00000287814,ENSP00000313437,ENSP00000347665,ENSP00000350425,ENSP00000355180,ENSP00000355896,ENSP00000371790,ENSP00000391826	APOA4,APOE,COL18A1,COL6A1,FGF18,FGF7,FGF9,IGF2,IL6,MMP19,SPARC,TGFB2,TIMP4
GO.0042698	ovulation cycle	6	3.29e-06	ENSP00000267843,ENSP00000287814,ENSP00000313437,ENSP00000355896,ENSP00000361125,ENSP00000379138	AFP,FGF7,MMP19,TGFB2,TIMP4,VEGFA
GO.0009887	organ morphogenesis	11	5.03e-06	ENSP00000258743,ENSP00000267843,ENSP00000274625,ENSP00000347665,ENSP00000355896,ENSP00000357980,ENSP00000361125,ENSP00000363827,ENSP00000369889,ENSP00000371790,ENSP00000391826	COL18A1,COL2A1,FGF18,FGF7,FGF9,HSPG2,HTRA1,IGF2,IL6,TGFB2,VEGFA
GO.0022617	extracellular matrix disassembly	6	6.41e-06	ENSP00000313437,ENSP00000346839,ENSP00000347665,ENSP00000355180,ENSP00000363827,ENSP00000369889	COL18A1,COL2A1,COL6A1,FN1,HSPG2,MMP19
GO.0001558	regulation of cell growth	8	1.07e-05	ENSP00000252486,ENSP00000295666,ENSP00000301464,ENSP00000346839,ENSP00000355896,ENSP00000357980,ENSP00000361125,ENSP00000370473	APOE,FN1,HTRA1,IGFBP3,IGFBP6,IGFBP7,TGFB2,VEGFA
GO.0008284	positive regulation of cell proliferation	10	2.74e-05	ENSP00000258743,ENSP00000267843,ENSP00000274625,ENSP00000279804,ENSP00000346839,ENSP00000347665,ENSP00000355896,ENSP00000357980,ENSP00000361125,ENSP00000391826	COL18A1,CTF1,FGF18,FGF7,FN1,HTRA1,IGF2,IL6,TGFB2,VEGFA
GO.0043410	positive regulation of MAPK cascade	8	3.41e-05	ENSP00000258743,ENSP00000274625,ENSP00000355896,ENSP00000361125,ENSP00000370473,ENSP00000371790,ENSP00000391826,ENSP00000428340	ANGPT1,FGF18,FGF9,IGF2,IGFBP3,IL6,TGFB2,VEGFA
GO.0050731	positive regulation of peptidyl-tyrosine phosphorylation	6	3.47e-05	ENSP00000258743,ENSP00000267843,ENSP00000279804,ENSP00000361125,ENSP00000391826,ENSP00000428340	ANGPT1,CTF1,FGF7,IGF2,IL6,VEGFA
GO.0044243	multicellular organismal catabolic process	5	3.78e-05	ENSP00000313437,ENSP00000347665,ENSP00000350425,ENSP00000355180,ENSP00000369889	APOA4,COL18A1,COL2A1,COL6A1,MMP19
GO.0040008	regulation of growth	9	4.33e-05	ENSP00000252486,ENSP00000295666,ENSP00000301464,ENSP00000346839,ENSP00000355896,ENSP00000357980,ENSP00000361125,ENSP00000370473,ENSP00000371790	APOE,FGF9,FN1,HTRA1,IGFBP3,IGFBP6,IGFBP7,TGFB2,VEGFA
GO.0009653	anatomical structure morphogenesis	14	4.74e-05	ENSP00000252486,ENSP00000258743,ENSP00000267843,ENSP00000313437,ENSP00000346839,ENSP00000355180,ENSP00000355896,ENSP00000357980,ENSP00000361125,ENSP00000363827,ENSP00000369889,ENSP00000371790,ENSP00000391826,ENSP00000428340	ANGPT1,APOE,COL2A1,COL6A1,FGF7,FGF9,FN1,HSPG2,HTRA1,IGF2,IL6,MMP19,TGFB2,VEGFA
GO.0022602	ovulation cycle process	5	4.75e-05	ENSP00000267843,ENSP00000313437,ENSP00000355896,ENSP00000361125,ENSP00000379138	AFP,FGF7,MMP19,TGFB2,VEGFA
GO.0001501	skeletal system development	8	4.97e-05	ENSP00000231061,ENSP00000274341,ENSP00000274625,ENSP00000355896,ENSP00000363827,ENSP00000369889,ENSP00000371790,ENSP00000391826	COL2A1,FGF18,FGF9,HAPLN1,HSPG2,IGF2,SPARC,TGFB2
GO.0002576	platelet degranulation	5	5.38e-05	ENSP00000231061,ENSP00000346839,ENSP00000355896,ENSP00000361125,ENSP00000391826	FN1,IGF2,SPARC,TGFB2,VEGFA
GO.0007167	enzyme linked receptor protein signaling pathway	10	7.65e-05	ENSP00000267843,ENSP00000274625,ENSP00000279804,ENSP00000295633,ENSP00000355896,ENSP00000361125,ENSP00000371790,ENSP00000379138,ENSP00000391826,ENSP00000428340	AFP,ANGPT1,CTF1,FGF18,FGF7,FGF9,FSTL1,IGF2,TGFB2,VEGFA
GO.0010594	regulation of endothelial cell migration	5	9.95e-05	ENSP00000231061,ENSP00000252486,ENSP00000274625,ENSP00000361125,ENSP00000428340	ANGPT1,APOE,FGF18,SPARC,VEGFA
GO.0045785	positive regulation of cell adhesion	7	9.95e-05	ENSP00000258743,ENSP00000346839,ENSP00000355896,ENSP00000361125,ENSP00000384169,ENSP00000391826,ENSP00000428340	ANGPT1,FBLN2,FN1,IGF2,IL6,TGFB2,VEGFA
GO.0045937	positive regulation of phosphate metabolic process	10	9.95e-05	ENSP00000252486,ENSP00000258743,ENSP00000267843,ENSP00000274625,ENSP00000279804,ENSP00000355896,ENSP00000361125,ENSP00000370473,ENSP00000371790,ENSP00000391826	APOE,CTF1,FGF18,FGF7,FGF9,IGF2,IGFBP3,IL6,TGFB2,VEGFA
GO.0032270	positive regulation of cellular protein metabolic process	11	0.000147	ENSP00000252486,ENSP00000258743,ENSP00000267843,ENSP00000274625,ENSP00000279804,ENSP00000346839,ENSP00000355896,ENSP00000361125,ENSP00000370473,ENSP00000371790,ENSP00000391826	APOE,CTF1,FGF18,FGF7,FGF9,FN1,IGF2,IGFBP3,IL6,TGFB2,VEGFA
GO.0035272	exocrine system development	4	0.000147	ENSP00000258743,ENSP00000267843,ENSP00000355896,ENSP00000391826	FGF7,IGF2,IL6,TGFB2
GO.0010243	response to organonitrogen compound	9	0.000187	ENSP00000231061,ENSP00000258743,ENSP00000267843,ENSP00000274625,ENSP00000287814,ENSP00000313437,ENSP00000355180,ENSP00000371790,ENSP00000391826	COL6A1,FGF18,FGF7,FGF9,IGF2,IL6,MMP19,SPARC,TIMP4
GO.0001934	positive regulation of protein phosphorylation	9	0.000217	ENSP00000258743,ENSP00000267843,ENSP00000274625,ENSP00000279804,ENSP00000355896,ENSP00000361125,ENSP00000370473,ENSP00000371790,ENSP00000391826	CTF1,FGF18,FGF7,FGF9,IGF2,IGFBP3,IL6,TGFB2,VEGFA
GO.0030168	platelet activation	6	0.000234	ENSP00000231061,ENSP00000258743,ENSP00000346839,ENSP00000355896,ENSP00000361125,ENSP00000391826	FN1,IGF2,IL6,SPARC,TGFB2,VEGFA
GO.0009719	response to endogenous stimulus	11	0.000275	ENSP00000231061,ENSP00000258743,ENSP00000267843,ENSP00000274625,ENSP00000295633,ENSP00000313437,ENSP00000355180,ENSP00000355896,ENSP00000369889,ENSP00000371790,ENSP00000391826	COL2A1,COL6A1,FGF18,FGF7,FGF9,FSTL1,IGF2,IL6,MMP19,SPARC,TGFB2
GO.0051781	positive regulation of cell division	5	0.000275	ENSP00000267843,ENSP00000355896,ENSP00000361125,ENSP00000371790,ENSP00000391826	FGF7,FGF9,IGF2,TGFB2,VEGFA
GO.0051128	regulation of cellular component organization	13	0.000335	ENSP00000231061,ENSP00000252486,ENSP00000258743,ENSP00000274341,ENSP00000295666,ENSP00000301464,ENSP00000346839,ENSP00000355896,ENSP00000357980,ENSP00000361125,ENSP00000370473,ENSP00000391826,ENSP00000428340	ANGPT1,APOE,FN1,HAPLN1,HTRA1,IGF2,IGFBP3,IGFBP6,IGFBP7,IL6,SPARC,TGFB2,VEGFA
GO.0043434	response to peptide hormone	7	0.000358	ENSP00000231061,ENSP00000258743,ENSP00000267843,ENSP00000274625,ENSP00000287814,ENSP00000371790,ENSP00000391826	FGF18,FGF7,FGF9,IGF2,IL6,SPARC,TIMP4
GO.0010595	positive regulation of endothelial cell migration	4	0.00038	ENSP00000231061,ENSP00000274625,ENSP00000361125,ENSP00000428340	ANGPT1,FGF18,SPARC,VEGFA
GO.0030949	positive regulation of vascular endothelial growth factor receptor signaling pathway	3	0.00038	ENSP00000274625,ENSP00000361125,ENSP00000371790	FGF18,FGF9,VEGFA
GO.0071363	cellular response to growth factor stimulus	8	0.00038	ENSP00000231061,ENSP00000267843,ENSP00000274625,ENSP00000295633,ENSP00000355896,ENSP00000361125,ENSP00000369889,ENSP00000371790	COL2A1,FGF18,FGF7,FGF9,FSTL1,SPARC,TGFB2,VEGFA
GO.0001932	regulation of protein phosphorylation	10	0.000431	ENSP00000252486,ENSP00000258743,ENSP00000267843,ENSP00000274625,ENSP00000279804,ENSP00000346839,ENSP00000355896,ENSP00000361125,ENSP00000371790,ENSP00000391826	APOE,CTF1,FGF18,FGF7,FGF9,FN1,IGF2,IL6,TGFB2,VEGFA
GO.0008285	negative regulation of cell proliferation	8	0.000431	ENSP00000231061,ENSP00000252486,ENSP00000258743,ENSP00000295666,ENSP00000301464,ENSP00000347665,ENSP00000355896,ENSP00000370473	APOE,COL18A1,IGFBP3,IGFBP6,IGFBP7,IL6,SPARC,TGFB2
GO.0002062	chondrocyte differentiation	4	0.000438	ENSP00000274625,ENSP00000363827,ENSP00000369889,ENSP00000371790	COL2A1,FGF18,FGF9,HSPG2
GO.0048731	system development	16	0.000438	ENSP00000231061,ENSP00000252486,ENSP00000258743,ENSP00000274341,ENSP00000274625,ENSP00000287814,ENSP00000313437,ENSP00000346839,ENSP00000350425,ENSP00000355180,ENSP00000355896,ENSP00000357980,ENSP00000361125,ENSP00000363827,ENSP00000369889,ENSP00000379138	AFP,APOA4,APOE,COL2A1,COL6A1,FGF18,FN1,HAPLN1,HSPG2,HTRA1,IL6,MMP19,SPARC,TGFB2,TIMP4,VEGFA
GO.0050679	positive regulation of epithelial cell proliferation	5	0.000438	ENSP00000258743,ENSP00000267843,ENSP00000357980,ENSP00000361125,ENSP00000371790	FGF7,FGF9,HTRA1,IL6,VEGFA
GO.0030154	cell differentiation	15	0.000448	ENSP00000252486,ENSP00000258743,ENSP00000274625,ENSP00000279804,ENSP00000313437,ENSP00000347665,ENSP00000350425,ENSP00000355180,ENSP00000355896,ENSP00000361125,ENSP00000363827,ENSP00000370473,ENSP00000371790,ENSP00000391826,ENSP00000428340	ANGPT1,APOA4,APOE,COL18A1,COL6A1,CTF1,FGF18,FGF9,HSPG2,IGF2,IGFBP3,IL6,MMP19,TGFB2,VEGFA
GO.0051216	cartilage development	5	0.000494	ENSP00000274625,ENSP00000355896,ENSP00000363827,ENSP00000369889,ENSP00000371790	COL2A1,FGF18,FGF9,HSPG2,TGFB2
GO.0042060	wound healing	8	0.000553	ENSP00000231061,ENSP00000258743,ENSP00000267843,ENSP00000346839,ENSP00000355896,ENSP00000361125,ENSP00000391826,ENSP00000428340	ANGPT1,FGF7,FN1,IGF2,IL6,SPARC,TGFB2,VEGFA
GO.0032940	secretion by cell	7	0.000598	ENSP00000231061,ENSP00000258743,ENSP00000267843,ENSP00000346839,ENSP00000355896,ENSP00000361125,ENSP00000391826	FGF7,FN1,IGF2,IL6,SPARC,TGFB2,VEGFA
GO.0030574	collagen catabolic process	4	0.000617	ENSP00000313437,ENSP00000347665,ENSP00000355180,ENSP00000369889	COL18A1,COL2A1,COL6A1,MMP19
GO.0048468	cell development	11	0.000717	ENSP00000252486,ENSP00000258743,ENSP00000274625,ENSP00000279804,ENSP00000346839,ENSP00000347665,ENSP00000350425,ENSP00000355180,ENSP00000355896,ENSP00000361125,ENSP00000369889	APOA4,APOE,COL18A1,COL2A1,COL6A1,CTF1,FGF18,FN1,IL6,TGFB2,VEGFA
GO.0071495	cellular response to endogenous stimulus	9	0.000936	ENSP00000258743,ENSP00000267843,ENSP00000274625,ENSP00000295633,ENSP00000355180,ENSP00000355896,ENSP00000369889,ENSP00000371790,ENSP00000391826	COL2A1,COL6A1,FGF18,FGF7,FGF9,FSTL1,IGF2,IL6,TGFB2
GO.0030324	lung development	5	0.000942	ENSP00000231061,ENSP00000267843,ENSP00000274625,ENSP00000361125,ENSP00000371790	FGF18,FGF7,FGF9,SPARC,VEGFA
GO.0010033	response to organic substance	13	0.00103	ENSP00000231061,ENSP00000258743,ENSP00000267843,ENSP00000274625,ENSP00000295633,ENSP00000313437,ENSP00000355180,ENSP00000355896,ENSP00000361125,ENSP00000369889,ENSP00000371790,ENSP00000379138,ENSP00000391826	AFP,COL2A1,COL6A1,FGF18,FGF7,FGF9,FSTL1,IGF2,IL6,MMP19,SPARC,TGFB2,VEGFA
GO.0030323	respiratory tube development	5	0.00103	ENSP00000231061,ENSP00000267843,ENSP00000274625,ENSP00000361125,ENSP00000371790	FGF18,FGF7,FGF9,SPARC,VEGFA
GO.0007596	blood coagulation	7	0.0011	ENSP00000231061,ENSP00000258743,ENSP00000346839,ENSP00000355896,ENSP00000361125,ENSP00000391826,ENSP00000428340	ANGPT1,FN1,IGF2,IL6,SPARC,TGFB2,VEGFA
GO.1902531	regulation of intracellular signal transduction	10	0.00123	ENSP00000252486,ENSP00000258743,ENSP00000274625,ENSP00000279804,ENSP00000346839,ENSP00000355896,ENSP00000361125,ENSP00000370473,ENSP00000371790,ENSP00000391826	APOE,CTF1,FGF18,FGF9,FN1,IGF2,IGFBP3,IL6,TGFB2,VEGFA
GO.0008406	gonad development	5	0.00124	ENSP00000267843,ENSP00000313437,ENSP00000361125,ENSP00000371790,ENSP00000379138	AFP,FGF7,FGF9,MMP19,VEGFA
GO.0070372	regulation of ERK1 and ERK2 cascade	5	0.00124	ENSP00000258743,ENSP00000274625,ENSP00000346839,ENSP00000361125,ENSP00000428340	ANGPT1,FGF18,FN1,IL6,VEGFA
GO.0001958	endochondral ossification	3	0.00133	ENSP00000274625,ENSP00000363827,ENSP00000369889	COL2A1,FGF18,HSPG2
GO.0007435	salivary gland morphogenesis	3	0.00133	ENSP00000258743,ENSP00000267843,ENSP00000355896	FGF7,IL6,TGFB2
GO.0045137	development of primary sexual characteristics	5	0.00133	ENSP00000267843,ENSP00000313437,ENSP00000361125,ENSP00000371790,ENSP00000379138	AFP,FGF7,FGF9,MMP19,VEGFA
GO.0061448	connective tissue development	5	0.00133	ENSP00000274625,ENSP00000355896,ENSP00000363827,ENSP00000369889,ENSP00000371790	COL2A1,FGF18,FGF9,HSPG2,TGFB2
GO.0008585	female gonad development	4	0.00139	ENSP00000267843,ENSP00000313437,ENSP00000361125,ENSP00000379138	AFP,FGF7,MMP19,VEGFA
GO.0051094	positive regulation of developmental process	9	0.00142	ENSP00000252486,ENSP00000258743,ENSP00000267843,ENSP00000274625,ENSP00000346839,ENSP00000355896,ENSP00000361125,ENSP00000370473,ENSP00000371790	APOE,FGF18,FGF7,FGF9,FN1,IGFBP3,IL6,TGFB2,VEGFA
GO.1902533	positive regulation of intracellular signal transduction	8	0.00142	ENSP00000258743,ENSP00000274625,ENSP00000279804,ENSP00000355896,ENSP00000361125,ENSP00000370473,ENSP00000371790,ENSP00000391826	CTF1,FGF18,FGF9,IGF2,IGFBP3,IL6,TGFB2,VEGFA
GO.0046545	development of primary female sexual characteristics	4	0.00165	ENSP00000267843,ENSP00000313437,ENSP00000361125,ENSP00000379138	AFP,FGF7,MMP19,VEGFA
GO.0060541	respiratory system development	5	0.00165	ENSP00000231061,ENSP00000267843,ENSP00000274625,ENSP00000361125,ENSP00000371790	FGF18,FGF7,FGF9,SPARC,VEGFA
GO.0007431	salivary gland development	3	0.0017	ENSP00000258743,ENSP00000267843,ENSP00000355896	FGF7,IL6,TGFB2
GO.0048513	organ development	13	0.00191	ENSP00000231061,ENSP00000258743,ENSP00000274625,ENSP00000279804,ENSP00000313437,ENSP00000347665,ENSP00000355896,ENSP00000357980,ENSP00000361125,ENSP00000363827,ENSP00000369889,ENSP00000379138,ENSP00000391826	AFP,COL18A1,COL2A1,CTF1,FGF18,HSPG2,HTRA1,IGF2,IL6,MMP19,SPARC,TGFB2,VEGFA
GO.0071310	cellular response to organic substance	11	0.00192	ENSP00000231061,ENSP00000258743,ENSP00000267843,ENSP00000274625,ENSP00000295633,ENSP00000355180,ENSP00000355896,ENSP00000361125,ENSP00000369889,ENSP00000371790,ENSP00000391826	COL2A1,COL6A1,FGF18,FGF7,FGF9,FSTL1,IGF2,IL6,SPARC,TGFB2,VEGFA
GO.0009725	response to hormone	8	0.00194	ENSP00000231061,ENSP00000258743,ENSP00000267843,ENSP00000274625,ENSP00000313437,ENSP00000355896,ENSP00000371790,ENSP00000391826	FGF18,FGF7,FGF9,IGF2,IL6,MMP19,SPARC,TGFB2
GO.0051716	cellular response to stimulus	19	0.00208	ENSP00000231061,ENSP00000252486,ENSP00000258743,ENSP00000267843,ENSP00000274341,ENSP00000274625,ENSP00000279804,ENSP00000295633,ENSP00000301464,ENSP00000350425,ENSP00000355180,ENSP00000355896,ENSP00000361125,ENSP00000363827,ENSP00000369889,ENSP00000371790,ENSP00000379138,ENSP00000391826,ENSP00000428340	AFP,ANGPT1,APOA4,APOE,COL2A1,COL6A1,CTF1,FGF18,FGF7,FGF9,FSTL1,HAPLN1,HSPG2,IGF2,IGFBP6,IL6,SPARC,TGFB2,VEGFA
GO.0009605	response to external stimulus	11	0.00209	ENSP00000231061,ENSP00000258743,ENSP00000267843,ENSP00000287814,ENSP00000295633,ENSP00000350425,ENSP00000355180,ENSP00000361125,ENSP00000363827,ENSP00000369889,ENSP00000428340	ANGPT1,APOA4,COL2A1,COL6A1,FGF7,FSTL1,HSPG2,IL6,SPARC,TIMP4,VEGFA
GO.0048732	gland development	6	0.00217	ENSP00000258743,ENSP00000267843,ENSP00000355896,ENSP00000361125,ENSP00000379138,ENSP00000391826	AFP,FGF7,IGF2,IL6,TGFB2,VEGFA
GO.0070887	cellular response to chemical stimulus	12	0.00217	ENSP00000231061,ENSP00000258743,ENSP00000267843,ENSP00000274625,ENSP00000295633,ENSP00000350425,ENSP00000355180,ENSP00000355896,ENSP00000361125,ENSP00000369889,ENSP00000371790,ENSP00000391826	APOA4,COL2A1,COL6A1,FGF18,FGF7,FGF9,FSTL1,IGF2,IL6,SPARC,TGFB2,VEGFA
GO.0050918	positive chemotaxis	3	0.00224	ENSP00000267843,ENSP00000361125,ENSP00000428340	ANGPT1,FGF7,VEGFA
GO.0050900	leukocyte migration	5	0.0023	ENSP00000258743,ENSP00000346839,ENSP00000355896,ENSP00000361125,ENSP00000428340	ANGPT1,FN1,IL6,TGFB2,VEGFA
GO.0046660	female sex differentiation	4	0.00238	ENSP00000267843,ENSP00000313437,ENSP00000361125,ENSP00000379138	AFP,FGF7,MMP19,VEGFA
GO.0009888	tissue development	10	0.00247	ENSP00000258743,ENSP00000274625,ENSP00000346839,ENSP00000347665,ENSP00000355180,ENSP00000355896,ENSP00000361125,ENSP00000363827,ENSP00000369889,ENSP00000371790	COL18A1,COL2A1,COL6A1,FGF18,FGF9,FN1,HSPG2,IL6,TGFB2,VEGFA
GO.0007548	sex differentiation	5	0.00293	ENSP00000267843,ENSP00000313437,ENSP00000361125,ENSP00000371790,ENSP00000379138	AFP,FGF7,FGF9,MMP19,VEGFA
GO.0031175	neuron projection development	7	0.00293	ENSP00000252486,ENSP00000258743,ENSP00000350425,ENSP00000355180,ENSP00000355896,ENSP00000361125,ENSP00000369889	APOA4,APOE,COL2A1,COL6A1,IL6,TGFB2,VEGFA
GO.0007399	nervous system development	11	0.0032	ENSP00000252486,ENSP00000258743,ENSP00000274341,ENSP00000287814,ENSP00000346839,ENSP00000350425,ENSP00000355180,ENSP00000355896,ENSP00000361125,ENSP00000363827,ENSP00000371790	APOA4,APOE,COL6A1,FGF9,FN1,HAPLN1,HSPG2,IL6,TGFB2,TIMP4,VEGFA
GO.0009790	embryo development	8	0.00331	ENSP00000346839,ENSP00000355180,ENSP00000355896,ENSP00000361125,ENSP00000363827,ENSP00000369889,ENSP00000371790,ENSP00000428340	ANGPT1,COL2A1,COL6A1,FGF9,FN1,HSPG2,TGFB2,VEGFA
GO.0050710	negative regulation of cytokine secretion	3	0.00331	ENSP00000258743,ENSP00000346839,ENSP00000428340	ANGPT1,FN1,IL6
GO.0045859	regulation of protein kinase activity	7	0.00336	ENSP00000252486,ENSP00000258743,ENSP00000274625,ENSP00000355896,ENSP00000361125,ENSP00000391826,ENSP00000428340	ANGPT1,APOE,FGF18,IGF2,IL6,TGFB2,VEGFA
GO.0032868	response to insulin	5	0.00373	ENSP00000258743,ENSP00000267843,ENSP00000274625,ENSP00000371790,ENSP00000391826	FGF18,FGF7,FGF9,IGF2,IL6
GO.0043535	regulation of blood vessel endothelial cell migration	3	0.00373	ENSP00000252486,ENSP00000361125,ENSP00000428340	ANGPT1,APOE,VEGFA
GO.0007166	cell surface receptor signaling pathway	11	0.00419	ENSP00000258743,ENSP00000267843,ENSP00000274625,ENSP00000279804,ENSP00000295633,ENSP00000355896,ENSP00000361125,ENSP00000371790,ENSP00000379138,ENSP00000391826,ENSP00000428340	AFP,ANGPT1,CTF1,FGF18,FGF7,FGF9,FSTL1,IGF2,IL6,TGFB2,VEGFA
GO.0048523	negative regulation of cellular process	15	0.00419	ENSP00000231061,ENSP00000252486,ENSP00000258743,ENSP00000287814,ENSP00000295666,ENSP00000301464,ENSP00000346839,ENSP00000347665,ENSP00000350425,ENSP00000355896,ENSP00000357980,ENSP00000361125,ENSP00000369889,ENSP00000370473,ENSP00000371790	APOA4,APOE,COL18A1,COL2A1,FGF9,FN1,HTRA1,IGFBP3,IGFBP6,IGFBP7,IL6,SPARC,TGFB2,TIMP4,VEGFA
GO.0006950	response to stress	14	0.00427	ENSP00000231061,ENSP00000252486,ENSP00000258743,ENSP00000274341,ENSP00000274625,ENSP00000295633,ENSP00000346839,ENSP00000347665,ENSP00000350425,ENSP00000355896,ENSP00000361125,ENSP00000371790,ENSP00000391826,ENSP00000428340	ANGPT1,APOA4,APOE,COL18A1,FGF18,FGF9,FN1,FSTL1,HAPLN1,IGF2,IL6,SPARC,TGFB2,VEGFA
GO.0022604	regulation of cell morphogenesis	6	0.00427	ENSP00000231061,ENSP00000252486,ENSP00000258743,ENSP00000346839,ENSP00000355896,ENSP00000361125	APOE,FN1,IL6,SPARC,TGFB2,VEGFA
GO.0070374	positive regulation of ERK1 and ERK2 cascade	4	0.00427	ENSP00000258743,ENSP00000274625,ENSP00000361125,ENSP00000428340	ANGPT1,FGF18,IL6,VEGFA
GO.0044093	positive regulation of molecular function	10	0.00443	ENSP00000252486,ENSP00000258743,ENSP00000274625,ENSP00000346839,ENSP00000350425,ENSP00000355896,ENSP00000361125,ENSP00000370473,ENSP00000391826,ENSP00000428340	ANGPT1,APOA4,APOE,FGF18,FN1,IGF2,IGFBP3,IL6,TGFB2,VEGFA
GO.0034380	high-density lipoprotein particle assembly	2	0.00454	ENSP00000252486,ENSP00000350425	APOA4,APOE
GO.0051240	positive regulation of multicellular organismal process	9	0.0047	ENSP00000231061,ENSP00000252486,ENSP00000258743,ENSP00000267843,ENSP00000346839,ENSP00000355896,ENSP00000361125,ENSP00000371790,ENSP00000428340	ANGPT1,APOE,FGF7,FGF9,FN1,IL6,SPARC,TGFB2,VEGFA
GO.0002682	regulation of immune system process	9	0.00484	ENSP00000258743,ENSP00000267843,ENSP00000274625,ENSP00000355896,ENSP00000357980,ENSP00000361125,ENSP00000371790,ENSP00000391826,ENSP00000428340	ANGPT1,FGF18,FGF7,FGF9,HTRA1,IGF2,IL6,TGFB2,VEGFA
GO.1904035	regulation of epithelial cell apoptotic process	3	0.00504	ENSP00000258743,ENSP00000347665,ENSP00000428340	ANGPT1,COL18A1,IL6
GO.0009611	response to wounding	7	0.0057	ENSP00000231061,ENSP00000258743,ENSP00000346839,ENSP00000355896,ENSP00000361125,ENSP00000391826,ENSP00000428340	ANGPT1,FN1,IGF2,IL6,SPARC,TGFB2,VEGFA
GO.0010873	positive regulation of cholesterol esterification	2	0.0057	ENSP00000252486,ENSP00000350425	APOA4,APOE
GO.2001028	positive regulation of endothelial cell chemotaxis	2	0.0057	ENSP00000274625,ENSP00000361125	FGF18,VEGFA
GO.0007165	signal transduction	16	0.00591	ENSP00000231061,ENSP00000252486,ENSP00000258743,ENSP00000267843,ENSP00000274625,ENSP00000279804,ENSP00000295633,ENSP00000301464,ENSP00000350425,ENSP00000355896,ENSP00000361125,ENSP00000363827,ENSP00000371790,ENSP00000379138,ENSP00000391826,ENSP00000428340	AFP,ANGPT1,APOA4,APOE,CTF1,FGF18,FGF7,FGF9,FSTL1,HSPG2,IGF2,IGFBP6,IL6,SPARC,TGFB2,VEGFA
GO.0022008	neurogenesis	9	0.00601	ENSP00000252486,ENSP00000258743,ENSP00000279804,ENSP00000346839,ENSP00000350425,ENSP00000355180,ENSP00000355896,ENSP00000361125,ENSP00000369889	APOA4,APOE,COL2A1,COL6A1,CTF1,FN1,IL6,TGFB2,VEGFA
GO.0044767	single-organism developmental process	16	0.00601	ENSP00000231061,ENSP00000252486,ENSP00000258743,ENSP00000274341,ENSP00000274625,ENSP00000287814,ENSP00000313437,ENSP00000350425,ENSP00000355180,ENSP00000355896,ENSP00000357980,ENSP00000361125,ENSP00000363827,ENSP00000369889,ENSP00000370473,ENSP00000379138	AFP,APOA4,APOE,COL2A1,COL6A1,FGF18,HAPLN1,HSPG2,HTRA1,IGFBP3,IL6,MMP19,SPARC,TGFB2,TIMP4,VEGFA
GO.0007275	multicellular organismal development	15	0.00606	ENSP00000231061,ENSP00000252486,ENSP00000258743,ENSP00000274341,ENSP00000274625,ENSP00000287814,ENSP00000313437,ENSP00000350425,ENSP00000355180,ENSP00000355896,ENSP00000357980,ENSP00000361125,ENSP00000363827,ENSP00000369889,ENSP00000379138	AFP,APOA4,APOE,COL2A1,COL6A1,FGF18,HAPLN1,HSPG2,HTRA1,IL6,MMP19,SPARC,TGFB2,TIMP4,VEGFA
GO.0008286	insulin receptor signaling pathway	4	0.00606	ENSP00000267843,ENSP00000274625,ENSP00000371790,ENSP00000391826	FGF18,FGF7,FGF9,IGF2
GO.0043085	positive regulation of catalytic activity	9	0.0066	ENSP00000252486,ENSP00000274625,ENSP00000346839,ENSP00000350425,ENSP00000355896,ENSP00000361125,ENSP00000370473,ENSP00000391826,ENSP00000428340	ANGPT1,APOA4,APOE,FGF18,FN1,IGF2,IGFBP3,TGFB2,VEGFA
GO.0001541	ovarian follicle development	3	0.00661	ENSP00000267843,ENSP00000313437,ENSP00000361125	FGF7,MMP19,VEGFA
GO.0050790	regulation of catalytic activity	11	0.00666	ENSP00000252486,ENSP00000258743,ENSP00000274625,ENSP00000287814,ENSP00000346839,ENSP00000350425,ENSP00000355896,ENSP00000361125,ENSP00000370473,ENSP00000391826,ENSP00000428340	ANGPT1,APOA4,APOE,FGF18,FN1,IGF2,IGFBP3,IL6,TGFB2,TIMP4,VEGFA
GO.0048666	neuron development	7	0.00728	ENSP00000252486,ENSP00000258743,ENSP00000279804,ENSP00000350425,ENSP00000355180,ENSP00000361125,ENSP00000369889	APOA4,APOE,COL2A1,COL6A1,CTF1,IL6,VEGFA
GO.0060348	bone development	4	0.00728	ENSP00000231061,ENSP00000274625,ENSP00000363827,ENSP00000369889	COL2A1,FGF18,HSPG2,SPARC
GO.1901701	cellular response to oxygen-containing compound	7	0.00728	ENSP00000258743,ENSP00000267843,ENSP00000274625,ENSP00000350425,ENSP00000355180,ENSP00000371790,ENSP00000391826	APOA4,COL6A1,FGF18,FGF7,FGF9,IGF2,IL6
GO.0045597	positive regulation of cell differentiation	7	0.00734	ENSP00000252486,ENSP00000258743,ENSP00000274625,ENSP00000346839,ENSP00000355896,ENSP00000361125,ENSP00000370473	APOE,FGF18,FN1,IGFBP3,IL6,TGFB2,VEGFA
GO.0060350	endochondral bone morphogenesis	3	0.00745	ENSP00000274625,ENSP00000363827,ENSP00000369889	COL2A1,FGF18,HSPG2
GO.0009628	response to abiotic stimulus	8	0.00755	ENSP00000231061,ENSP00000252486,ENSP00000258743,ENSP00000347665,ENSP00000350425,ENSP00000355896,ENSP00000361125,ENSP00000363827	APOA4,APOE,COL18A1,HSPG2,IL6,SPARC,TGFB2,VEGFA
GO.0001542	ovulation from ovarian follicle	2	0.00811	ENSP00000313437,ENSP00000379138	AFP,MMP19
GO.0034372	very-low-density lipoprotein particle remodeling	2	0.00811	ENSP00000252486,ENSP00000350425	APOA4,APOE
GO.0030516	regulation of axon extension	3	0.00829	ENSP00000252486,ENSP00000346839,ENSP00000361125	APOE,FN1,VEGFA
GO.0032879	regulation of localization	11	0.00829	ENSP00000231061,ENSP00000252486,ENSP00000258743,ENSP00000267843,ENSP00000274625,ENSP00000346839,ENSP00000347665,ENSP00000350425,ENSP00000355896,ENSP00000361125,ENSP00000370473	APOA4,APOE,COL18A1,FGF18,FGF7,FN1,IGFBP3,IL6,SPARC,TGFB2,VEGFA
GO.0042221	response to chemical	14	0.00881	ENSP00000231061,ENSP00000252486,ENSP00000258743,ENSP00000267843,ENSP00000274625,ENSP00000295633,ENSP00000313437,ENSP00000347665,ENSP00000355896,ENSP00000361125,ENSP00000371790,ENSP00000379138,ENSP00000391826,ENSP00000428340	AFP,ANGPT1,APOE,COL18A1,FGF18,FGF7,FGF9,FSTL1,IGF2,IL6,MMP19,SPARC,TGFB2,VEGFA
GO.1901617	organic hydroxy compound biosynthetic process	4	0.00881	ENSP00000252486,ENSP00000267843,ENSP00000350425,ENSP00000355896	APOA4,APOE,FGF7,TGFB2
GO.0030155	regulation of cell adhesion	6	0.00919	ENSP00000258743,ENSP00000346839,ENSP00000355896,ENSP00000361125,ENSP00000384169,ENSP00000391826	FBLN2,FN1,IGF2,IL6,TGFB2,VEGFA
GO.0043129	surfactant homeostasis	2	0.00942	ENSP00000267843,ENSP00000361125	FGF7,VEGFA
GO.0035295	tube development	6	0.00979	ENSP00000231061,ENSP00000267843,ENSP00000274625,ENSP00000355896,ENSP00000361125,ENSP00000371790	FGF18,FGF7,FGF9,SPARC,TGFB2,VEGFA
GO.0040011	locomotion	8	0.0107	ENSP00000258743,ENSP00000267843,ENSP00000346839,ENSP00000355180,ENSP00000355896,ENSP00000361125,ENSP00000369889,ENSP00000428340	ANGPT1,COL2A1,COL6A1,FGF7,FN1,IL6,TGFB2,VEGFA
GO.0032101	regulation of response to external stimulus	7	0.0109	ENSP00000252486,ENSP00000258743,ENSP00000267843,ENSP00000274341,ENSP00000274625,ENSP00000357980,ENSP00000361125	APOE,FGF18,FGF7,HAPLN1,HTRA1,IL6,VEGFA
GO.0031325	positive regulation of cellular metabolic process	12	0.011	ENSP00000252486,ENSP00000258743,ENSP00000274341,ENSP00000274625,ENSP00000279804,ENSP00000346839,ENSP00000350425,ENSP00000355896,ENSP00000361125,ENSP00000370473,ENSP00000371790,ENSP00000391826	APOA4,APOE,CTF1,FGF18,FGF9,FN1,HAPLN1,IGF2,IGFBP3,IL6,TGFB2,VEGFA
GO.0001523	retinoid metabolic process	3	0.0118	ENSP00000252486,ENSP00000350425,ENSP00000363827	APOA4,APOE,HSPG2
GO.0010646	regulation of cell communication	12	0.0118	ENSP00000252486,ENSP00000258743,ENSP00000274341,ENSP00000279804,ENSP00000301464,ENSP00000346839,ENSP00000355896,ENSP00000357980,ENSP00000361125,ENSP00000369889,ENSP00000371790,ENSP00000391826	APOE,COL2A1,CTF1,FGF9,FN1,HAPLN1,HTRA1,IGF2,IGFBP6,IL6,TGFB2,VEGFA
GO.0009966	regulation of signal transduction	11	0.0119	ENSP00000252486,ENSP00000258743,ENSP00000279804,ENSP00000301464,ENSP00000346839,ENSP00000355896,ENSP00000357980,ENSP00000361125,ENSP00000369889,ENSP00000371790,ENSP00000391826	APOE,COL2A1,CTF1,FGF9,FN1,HTRA1,IGF2,IGFBP6,IL6,TGFB2,VEGFA
GO.0051246	regulation of protein metabolic process	11	0.0131	ENSP00000252486,ENSP00000258743,ENSP00000267843,ENSP00000274625,ENSP00000279804,ENSP00000287814,ENSP00000350425,ENSP00000355896,ENSP00000361125,ENSP00000371790,ENSP00000391826	APOA4,APOE,CTF1,FGF18,FGF7,FGF9,IGF2,IL6,TGFB2,TIMP4,VEGFA
GO.0006935	chemotaxis	6	0.0138	ENSP00000258743,ENSP00000267843,ENSP00000355180,ENSP00000361125,ENSP00000369889,ENSP00000428340	ANGPT1,COL2A1,COL6A1,FGF7,IL6,VEGFA
GO.0034375	high-density lipoprotein particle remodeling	2	0.014	ENSP00000252486,ENSP00000350425	APOA4,APOE
GO.0097529	myeloid leukocyte migration	3	0.014	ENSP00000258743,ENSP00000355896,ENSP00000361125	IL6,TGFB2,VEGFA
GO.0007267	cell-cell signaling	7	0.0142	ENSP00000252486,ENSP00000258743,ENSP00000267843,ENSP00000274625,ENSP00000279804,ENSP00000355896,ENSP00000371790	APOE,CTF1,FGF18,FGF7,FGF9,IL6,TGFB2
GO.0002697	regulation of immune effector process	5	0.0143	ENSP00000258743,ENSP00000267843,ENSP00000355896,ENSP00000357980,ENSP00000428340	ANGPT1,FGF7,HTRA1,IL6,TGFB2
GO.0051897	positive regulation of protein kinase B signaling	3	0.0143	ENSP00000258743,ENSP00000391826,ENSP00000428340	ANGPT1,IGF2,IL6
GO.0031016	pancreas development	3	0.0153	ENSP00000258743,ENSP00000379138,ENSP00000391826	AFP,IGF2,IL6
GO.0033700	phospholipid efflux	2	0.0157	ENSP00000252486,ENSP00000350425	APOA4,APOE
GO.0032869	cellular response to insulin stimulus	4	0.0159	ENSP00000267843,ENSP00000274625,ENSP00000371790,ENSP00000391826	FGF18,FGF7,FGF9,IGF2
GO.0000904	cell morphogenesis involved in differentiation	6	0.0167	ENSP00000346839,ENSP00000347665,ENSP00000355180,ENSP00000355896,ENSP00000361125,ENSP00000369889	COL18A1,COL2A1,COL6A1,FN1,TGFB2,VEGFA
GO.0048705	skeletal system morphogenesis	4	0.0169	ENSP00000274625,ENSP00000355896,ENSP00000363827,ENSP00000369889	COL2A1,FGF18,HSPG2,TGFB2
GO.0032269	negative regulation of cellular protein metabolic process	7	0.0171	ENSP00000252486,ENSP00000258743,ENSP00000287814,ENSP00000355896,ENSP00000361125,ENSP00000370473,ENSP00000428340	ANGPT1,APOE,IGFBP3,IL6,TGFB2,TIMP4,VEGFA
GO.0007155	cell adhesion	7	0.0173	ENSP00000258743,ENSP00000274341,ENSP00000295666,ENSP00000347665,ENSP00000350425,ENSP00000355180,ENSP00000428340	ANGPT1,APOA4,COL18A1,COL6A1,HAPLN1,IGFBP7,IL6
GO.0061458	reproductive system development	5	0.0176	ENSP00000267843,ENSP00000313437,ENSP00000361125,ENSP00000371790,ENSP00000379138	AFP,FGF7,FGF9,MMP19,VEGFA
GO.0051641	cellular localization	10	0.0179	ENSP00000231061,ENSP00000252486,ENSP00000258743,ENSP00000267843,ENSP00000346839,ENSP00000355896,ENSP00000361125,ENSP00000371790,ENSP00000391826,ENSP00000428340	ANGPT1,APOE,FGF7,FGF9,FN1,IGF2,IL6,SPARC,TGFB2,VEGFA
GO.0002700	regulation of production of molecular mediator of immune response	3	0.018	ENSP00000258743,ENSP00000355896,ENSP00000428340	ANGPT1,IL6,TGFB2
GO.0030182	neuron differentiation	7	0.0181	ENSP00000252486,ENSP00000258743,ENSP00000279804,ENSP00000350425,ENSP00000355180,ENSP00000361125,ENSP00000369889	APOA4,APOE,COL2A1,COL6A1,CTF1,IL6,VEGFA
GO.0043691	reverse cholesterol transport	2	0.0187	ENSP00000252486,ENSP00000350425	APOA4,APOE
GO.0048699	generation of neurons	8	0.0187	ENSP00000252486,ENSP00000258743,ENSP00000279804,ENSP00000346839,ENSP00000350425,ENSP00000355180,ENSP00000361125,ENSP00000369889	APOA4,APOE,COL2A1,COL6A1,CTF1,FN1,IL6,VEGFA
GO.0060445	branching involved in salivary gland morphogenesis	2	0.0187	ENSP00000258743,ENSP00000267843	FGF7,IL6
GO.0001936	regulation of endothelial cell proliferation	3	0.0189	ENSP00000231061,ENSP00000252486,ENSP00000361125	APOE,SPARC,VEGFA
GO.0002698	negative regulation of immune effector process	3	0.0189	ENSP00000355896,ENSP00000357980,ENSP00000428340	ANGPT1,HTRA1,TGFB2
GO.0033138	positive regulation of peptidyl-serine phosphorylation	3	0.0189	ENSP00000258743,ENSP00000361125,ENSP00000428340	ANGPT1,IL6,VEGFA
GO.0045860	positive regulation of protein kinase activity	5	0.019	ENSP00000274625,ENSP00000355896,ENSP00000361125,ENSP00000391826,ENSP00000428340	ANGPT1,FGF18,IGF2,TGFB2,VEGFA
GO.0032502	developmental process	15	0.0192	ENSP00000231061,ENSP00000252486,ENSP00000258743,ENSP00000274341,ENSP00000287814,ENSP00000313437,ENSP00000350425,ENSP00000355180,ENSP00000355896,ENSP00000357980,ENSP00000361125,ENSP00000363827,ENSP00000369889,ENSP00000370473,ENSP00000379138	AFP,APOA4,APOE,COL2A1,COL6A1,HAPLN1,HSPG2,HTRA1,IGFBP3,IL6,MMP19,SPARC,TGFB2,TIMP4,VEGFA
GO.0045927	positive regulation of growth	4	0.0192	ENSP00000346839,ENSP00000355896,ENSP00000361125,ENSP00000371790	FGF9,FN1,TGFB2,VEGFA
GO.0048856	anatomical structure development	14	0.0195	ENSP00000231061,ENSP00000252486,ENSP00000258743,ENSP00000274341,ENSP00000287814,ENSP00000313437,ENSP00000350425,ENSP00000355180,ENSP00000355896,ENSP00000357980,ENSP00000361125,ENSP00000363827,ENSP00000369889,ENSP00000379138	AFP,APOA4,APOE,COL2A1,COL6A1,HAPLN1,HSPG2,HTRA1,IL6,MMP19,SPARC,TGFB2,TIMP4,VEGFA
GO.0003018	vascular process in circulatory system	3	0.0196	ENSP00000252486,ENSP00000361125,ENSP00000428340	ANGPT1,APOE,VEGFA
GO.0007169	transmembrane receptor protein tyrosine kinase signaling pathway	6	0.0196	ENSP00000267843,ENSP00000274625,ENSP00000361125,ENSP00000371790,ENSP00000391826,ENSP00000428340	ANGPT1,FGF18,FGF7,FGF9,IGF2,VEGFA
GO.0007603	phototransduction, visible light	3	0.0196	ENSP00000252486,ENSP00000350425,ENSP00000363827	APOA4,APOE,HSPG2
GO.0002719	negative regulation of cytokine production involved in immune response	2	0.0197	ENSP00000355896,ENSP00000428340	ANGPT1,TGFB2
GO.0048568	embryonic organ development	5	0.0202	ENSP00000355896,ENSP00000361125,ENSP00000363827,ENSP00000369889,ENSP00000371790	COL2A1,FGF9,HSPG2,TGFB2,VEGFA
GO.1901214	regulation of neuron death	4	0.0205	ENSP00000252486,ENSP00000258743,ENSP00000355896,ENSP00000428340	ANGPT1,APOE,IL6,TGFB2
GO.0016043	cellular component organization	15	0.0206	ENSP00000216286,ENSP00000231061,ENSP00000252486,ENSP00000258743,ENSP00000267843,ENSP00000274341,ENSP00000313437,ENSP00000350425,ENSP00000355180,ENSP00000355896,ENSP00000361125,ENSP00000363827,ENSP00000369889,ENSP00000384169,ENSP00000428340	ANGPT1,APOA4,APOE,COL2A1,COL6A1,FBLN2,FGF7,HAPLN1,HSPG2,IL6,MMP19,NID2,SPARC,TGFB2,VEGFA
GO.0051649	establishment of localization in cell	9	0.0206	ENSP00000231061,ENSP00000252486,ENSP00000258743,ENSP00000267843,ENSP00000346839,ENSP00000355896,ENSP00000361125,ENSP00000371790,ENSP00000391826	APOE,FGF7,FGF9,FN1,IGF2,IL6,SPARC,TGFB2,VEGFA
GO.0007507	heart development	5	0.0209	ENSP00000231061,ENSP00000355896,ENSP00000361125,ENSP00000363827,ENSP00000369889	COL2A1,HSPG2,SPARC,TGFB2,VEGFA
GO.0010906	regulation of glucose metabolic process	3	0.0214	ENSP00000258743,ENSP00000370473,ENSP00000391826	IGF2,IGFBP3,IL6
GO.1904037	positive regulation of epithelial cell apoptotic process	2	0.0214	ENSP00000258743,ENSP00000347665	COL18A1,IL6
GO.0051248	negative regulation of protein metabolic process	7	0.0219	ENSP00000252486,ENSP00000287814,ENSP00000350425,ENSP00000355896,ENSP00000361125,ENSP00000370473,ENSP00000428340	ANGPT1,APOA4,APOE,IGFBP3,TGFB2,TIMP4,VEGFA
GO.0010720	positive regulation of cell development	5	0.0222	ENSP00000252486,ENSP00000258743,ENSP00000346839,ENSP00000355896,ENSP00000361125	APOE,FN1,IL6,TGFB2,VEGFA
GO.0030595	leukocyte chemotaxis	3	0.0223	ENSP00000258743,ENSP00000355896,ENSP00000361125	IL6,TGFB2,VEGFA
GO.0010811	positive regulation of cell-substrate adhesion	3	0.0228	ENSP00000346839,ENSP00000361125,ENSP00000384169	FBLN2,FN1,VEGFA
GO.0034394	protein localization to cell surface	2	0.0229	ENSP00000267843,ENSP00000428340	ANGPT1,FGF7
GO.0051043	regulation of membrane protein ectodomain proteolysis	2	0.0229	ENSP00000252486,ENSP00000287814	APOE,TIMP4
GO.0044702	single organism reproductive process	7	0.0241	ENSP00000267843,ENSP00000287814,ENSP00000313437,ENSP00000355896,ENSP00000361125,ENSP00000371790,ENSP00000379138	AFP,FGF7,FGF9,MMP19,TGFB2,TIMP4,VEGFA
GO.0001502	cartilage condensation	2	0.0263	ENSP00000355896,ENSP00000369889	COL2A1,TGFB2
GO.0002092	positive regulation of receptor internalization	2	0.0263	ENSP00000361125,ENSP00000428340	ANGPT1,VEGFA
GO.0032268	regulation of cellular protein metabolic process	10	0.0263	ENSP00000252486,ENSP00000258743,ENSP00000267843,ENSP00000274625,ENSP00000279804,ENSP00000287814,ENSP00000355896,ENSP00000361125,ENSP00000371790,ENSP00000391826	APOE,CTF1,FGF18,FGF7,FGF9,IGF2,IL6,TGFB2,TIMP4,VEGFA
GO.0043536	positive regulation of blood vessel endothelial cell migration	2	0.0263	ENSP00000361125,ENSP00000428340	ANGPT1,VEGFA
GO.0071417	cellular response to organonitrogen compound	5	0.0275	ENSP00000267843,ENSP00000274625,ENSP00000355180,ENSP00000371790,ENSP00000391826	COL6A1,FGF18,FGF7,FGF9,IGF2
GO.0046165	alcohol biosynthetic process	3	0.0285	ENSP00000252486,ENSP00000267843,ENSP00000350425	APOA4,APOE,FGF7
GO.0050921	positive regulation of chemotaxis	3	0.0285	ENSP00000258743,ENSP00000274625,ENSP00000361125	FGF18,IL6,VEGFA
GO.0032504	multicellular organism reproduction	6	0.0289	ENSP00000267843,ENSP00000287814,ENSP00000313437,ENSP00000355896,ENSP00000361125,ENSP00000379138	AFP,FGF7,MMP19,TGFB2,TIMP4,VEGFA
GO.0045595	regulation of cell differentiation	8	0.0291	ENSP00000252486,ENSP00000258743,ENSP00000274625,ENSP00000346839,ENSP00000355896,ENSP00000361125,ENSP00000370473,ENSP00000371790	APOE,FGF18,FGF9,FN1,IGFBP3,IL6,TGFB2,VEGFA
GO.0060249	anatomical structure homeostasis	4	0.0294	ENSP00000258743,ENSP00000267843,ENSP00000361125,ENSP00000369889	COL2A1,FGF7,IL6,VEGFA
GO.0048638	regulation of developmental growth	4	0.0298	ENSP00000252486,ENSP00000346839,ENSP00000361125,ENSP00000371790	APOE,FGF9,FN1,VEGFA
GO.0007423	sensory organ development	5	0.0299	ENSP00000231061,ENSP00000355896,ENSP00000361125,ENSP00000369889,ENSP00000371790	COL2A1,FGF9,SPARC,TGFB2,VEGFA
GO.0045936	negative regulation of phosphate metabolic process	5	0.03	ENSP00000252486,ENSP00000258743,ENSP00000355896,ENSP00000370473,ENSP00000428340	ANGPT1,APOE,IGFBP3,IL6,TGFB2
GO.0050680	negative regulation of epithelial cell proliferation	3	0.0303	ENSP00000231061,ENSP00000252486,ENSP00000355896	APOE,SPARC,TGFB2
GO.0001649	osteoblast differentiation	3	0.0316	ENSP00000355180,ENSP00000370473,ENSP00000371790	COL6A1,FGF9,IGFBP3
GO.0031102	neuron projection regeneration	2	0.0316	ENSP00000252486,ENSP00000350425	APOA4,APOE
GO.0045666	positive regulation of neuron differentiation	4	0.032	ENSP00000252486,ENSP00000258743,ENSP00000346839,ENSP00000361125	APOE,FN1,IL6,VEGFA
GO.0048583	regulation of response to stimulus	12	0.032	ENSP00000252486,ENSP00000258743,ENSP00000267843,ENSP00000274341,ENSP00000279804,ENSP00000301464,ENSP00000346839,ENSP00000355896,ENSP00000357980,ENSP00000361125,ENSP00000369889,ENSP00000391826	APOE,COL2A1,CTF1,FGF7,FN1,HAPLN1,HTRA1,IGF2,IGFBP6,IL6,TGFB2,VEGFA
GO.0050776	regulation of immune response	6	0.0326	ENSP00000258743,ENSP00000267843,ENSP00000274625,ENSP00000355896,ENSP00000371790,ENSP00000428340	ANGPT1,FGF18,FGF7,FGF9,IL6,TGFB2
GO.0060351	cartilage development involved in endochondral bone morphogenesis	2	0.0334	ENSP00000363827,ENSP00000369889	COL2A1,HSPG2
GO.0051130	positive regulation of cellular component organization	7	0.0347	ENSP00000252486,ENSP00000274341,ENSP00000346839,ENSP00000355896,ENSP00000361125,ENSP00000391826,ENSP00000428340	ANGPT1,APOE,FN1,HAPLN1,IGF2,TGFB2,VEGFA
GO.0002251	organ or tissue specific immune response	2	0.0351	ENSP00000258743,ENSP00000350425	APOA4,IL6
GO.0010769	regulation of cell morphogenesis involved in differentiation	4	0.0351	ENSP00000252486,ENSP00000346839,ENSP00000355896,ENSP00000361125	APOE,FN1,TGFB2,VEGFA
GO.0030823	regulation of cGMP metabolic process	2	0.0351	ENSP00000252486,ENSP00000361125	APOE,VEGFA
GO.0033344	cholesterol efflux	2	0.0351	ENSP00000252486,ENSP00000350425	APOA4,APOE
GO.0043114	regulation of vascular permeability	2	0.0351	ENSP00000361125,ENSP00000428340	ANGPT1,VEGFA
GO.2000026	regulation of multicellular organismal development	8	0.0351	ENSP00000231061,ENSP00000252486,ENSP00000258743,ENSP00000274625,ENSP00000346839,ENSP00000355896,ENSP00000361125,ENSP00000371790	APOE,FGF18,FGF9,FN1,IL6,SPARC,TGFB2,VEGFA
GO.0001101	response to acid chemical	4	0.0372	ENSP00000231061,ENSP00000258743,ENSP00000347665,ENSP00000355180	COL18A1,COL6A1,IL6,SPARC
GO.0008360	regulation of cell shape	3	0.0395	ENSP00000258743,ENSP00000346839,ENSP00000361125	FN1,IL6,VEGFA
GO.0032147	activation of protein kinase activity	4	0.0395	ENSP00000355896,ENSP00000361125,ENSP00000391826,ENSP00000428340	ANGPT1,IGF2,TGFB2,VEGFA
GO.0032870	cellular response to hormone stimulus	5	0.0395	ENSP00000258743,ENSP00000267843,ENSP00000274625,ENSP00000371790,ENSP00000391826	FGF18,FGF7,FGF9,IGF2,IL6
GO.0010647	positive regulation of cell communication	8	0.0405	ENSP00000258743,ENSP00000274341,ENSP00000279804,ENSP00000355896,ENSP00000361125,ENSP00000370473,ENSP00000371790,ENSP00000391826	CTF1,FGF9,HAPLN1,IGF2,IGFBP3,IL6,TGFB2,VEGFA
GO.0048706	embryonic skeletal system development	3	0.0408	ENSP00000363827,ENSP00000369889,ENSP00000371790	COL2A1,FGF9,HSPG2
GO.0017038	protein import	3	0.0416	ENSP00000252486,ENSP00000355896,ENSP00000371790	APOE,FGF9,TGFB2
GO.0019433	triglyceride catabolic process	2	0.0416	ENSP00000252486,ENSP00000350425	APOA4,APOE
GO.0030307	positive regulation of cell growth	3	0.043	ENSP00000346839,ENSP00000355896,ENSP00000361125	FN1,TGFB2,VEGFA
GO.0001937	negative regulation of endothelial cell proliferation	2	0.0434	ENSP00000231061,ENSP00000252486	APOE,SPARC
GO.0031069	hair follicle morphogenesis	2	0.0434	ENSP00000267843,ENSP00000355896	FGF7,TGFB2
GO.0042517	positive regulation of tyrosine phosphorylation of Stat3 protein	2	0.0434	ENSP00000258743,ENSP00000279804	CTF1,IL6
GO.0048598	embryonic morphogenesis	5	0.0434	ENSP00000346839,ENSP00000355180,ENSP00000363827,ENSP00000369889,ENSP00000371790	COL2A1,COL6A1,FGF9,FN1,HSPG2
GO.0008361	regulation of cell size	3	0.0441	ENSP00000252486,ENSP00000346839,ENSP00000361125	APOE,FN1,VEGFA
GO.0045773	positive regulation of axon extension	2	0.0457	ENSP00000346839,ENSP00000361125	FN1,VEGFA
GO.0048015	phosphatidylinositol-mediated signaling	3	0.0457	ENSP00000267843,ENSP00000274625,ENSP00000371790	FGF18,FGF7,FGF9
GO.0044712	single-organism catabolic process	6	0.0463	ENSP00000252486,ENSP00000313437,ENSP00000347665,ENSP00000350425,ENSP00000355180,ENSP00000369889	APOA4,APOE,COL18A1,COL2A1,COL6A1,MMP19
GO.0065008	regulation of biological quality	11	0.0463	ENSP00000231061,ENSP00000252486,ENSP00000258743,ENSP00000267843,ENSP00000350425,ENSP00000355896,ENSP00000361125,ENSP00000369889,ENSP00000379138,ENSP00000391826,ENSP00000428340	AFP,ANGPT1,APOA4,APOE,COL2A1,FGF7,IGF2,IL6,SPARC,TGFB2,VEGFA
GO.0031400	negative regulation of protein modification process	5	0.0473	ENSP00000252486,ENSP00000258743,ENSP00000355896,ENSP00000370473,ENSP00000428340	ANGPT1,APOE,IGFBP3,IL6,TGFB2
GO.0031099	regeneration	3	0.0479	ENSP00000252486,ENSP00000350425,ENSP00000379138	AFP,APOA4,APOE
GO.0002053	positive regulation of mesenchymal cell proliferation	2	0.0494	ENSP00000361125,ENSP00000371790	FGF9,VEGFA
GO.0048730	epidermis morphogenesis	2	0.0494	ENSP00000267843,ENSP00000355896	FGF7,TGFB2

## Sheet: downCMd15xDMd1
#pathway ID	pathway description	observed gene count	false discovery rate	matching proteins in your network (IDs)	matching proteins in your network (labels)
GO.0019058	viral life cycle	10	7.93e-06	ENSP00000251453,ENSP00000290158,ENSP00000325875,ENSP00000346067,ENSP00000351777,ENSP00000362744,ENSP00000376176,ENSP00000379888,ENSP00000419425,ENSP00000433821	HSP90AB1,KPNB1,PPIA,RAN,RPS16,RPS3,RPS4X,RPS8,RPSA,VCP
GO.0051649	establishment of localization in cell	20	1.05e-05	ENSP00000211998,ENSP00000225655,ENSP00000251453,ENSP00000252699,ENSP00000262030,ENSP00000262982,ENSP00000269122,ENSP00000290158,ENSP00000301072,ENSP00000302961,ENSP00000315130,ENSP00000335153,ENSP00000336927,ENSP00000346067,ENSP00000355785,ENSP00000362744,ENSP00000376176,ENSP00000379888,ENSP00000419425,ENSP00000433821	ACTN4,ALDOA,ATP5B,CLTC,CLU,CSE1L,HSP90AA1,HSPA4,KPNB1,LEFTY2,PFN1,PPIA,RAN,RPS16,RPS3,RPS4X,RPS8,RPSA,TUBA1C,VCL
GO.0002576	platelet degranulation	7	1.16e-05	ENSP00000211998,ENSP00000225655,ENSP00000252699,ENSP00000315130,ENSP00000336927,ENSP00000355785,ENSP00000419425	ACTN4,ALDOA,CLU,LEFTY2,PFN1,PPIA,VCL
GO.0051641	cellular localization	21	1.84e-05	ENSP00000211998,ENSP00000225655,ENSP00000251453,ENSP00000252699,ENSP00000262030,ENSP00000262982,ENSP00000269122,ENSP00000290158,ENSP00000301072,ENSP00000302961,ENSP00000315130,ENSP00000335153,ENSP00000336927,ENSP00000338934,ENSP00000346067,ENSP00000355785,ENSP00000362744,ENSP00000376176,ENSP00000379888,ENSP00000419425,ENSP00000433821	ACTN4,ALDOA,ATP5B,CLTC,CLU,CSE1L,EZR,HSP90AA1,HSPA4,KPNB1,LEFTY2,PFN1,PPIA,RAN,RPS16,RPS3,RPS4X,RPS8,RPSA,TUBA1C,VCL
GO.0044765	single-organism transport	24	2.11e-05	ENSP00000211998,ENSP00000225655,ENSP00000251453,ENSP00000252699,ENSP00000256119,ENSP00000262982,ENSP00000269122,ENSP00000290158,ENSP00000301072,ENSP00000302961,ENSP00000315130,ENSP00000325875,ENSP00000335153,ENSP00000336927,ENSP00000338934,ENSP00000346067,ENSP00000355785,ENSP00000362744,ENSP00000362817,ENSP00000367123,ENSP00000376176,ENSP00000379888,ENSP00000419425,ENSP00000433821	ACTN4,ALDOA,CA1,CLTC,CLU,CSE1L,EZR,FABP3,HSP90AA1,HSP90AB1,HSPA4,KPNB1,LEFTY2,PFN1,PPIA,RAN,RPS16,RPS3,RPS4X,RPS8,RPSA,SLC3A2,TUBA1C,VCL
GO.0006810	transport	25	7.97e-05	ENSP00000211998,ENSP00000225655,ENSP00000251453,ENSP00000252699,ENSP00000256119,ENSP00000262982,ENSP00000269122,ENSP00000301072,ENSP00000302961,ENSP00000315130,ENSP00000318195,ENSP00000325875,ENSP00000335153,ENSP00000336927,ENSP00000338934,ENSP00000346067,ENSP00000355785,ENSP00000362744,ENSP00000362817,ENSP00000367123,ENSP00000369538,ENSP00000376176,ENSP00000379888,ENSP00000419425,ENSP00000433821	ACTN4,ALDOA,CA1,CLTC,CLU,CSE1L,EZR,FABP3,GDI2,HSP90AA1,HSP90AB1,HSPA4,LEFTY2,NCL,PFN1,PPIA,RAN,RPS16,RPS3,RPS4X,RPS8,RPSA,SLC3A2,TUBA1C,VCL
GO.0044403	symbiosis, encompassing mutualism through parasitism	13	7.97e-05	ENSP00000251453,ENSP00000290158,ENSP00000311121,ENSP00000325875,ENSP00000346067,ENSP00000351777,ENSP00000362744,ENSP00000370074,ENSP00000376176,ENSP00000379888,ENSP00000419425,ENSP00000426909,ENSP00000433821	GNB2L1,HSP90AB1,KPNB1,PPIA,PSMA8,RAN,RPS16,RPS3,RPS4X,RPS8,RPSA,SERPINB9,VCP
GO.0006886	intracellular protein transport	12	0.000146	ENSP00000251453,ENSP00000262982,ENSP00000269122,ENSP00000290158,ENSP00000302961,ENSP00000335153,ENSP00000346067,ENSP00000351777,ENSP00000362744,ENSP00000376176,ENSP00000379888,ENSP00000433821	CLTC,CSE1L,HSP90AA1,HSPA4,KPNB1,RAN,RPS16,RPS3,RPS4X,RPS8,RPSA,VCP
GO.0016032	viral process	12	0.000146	ENSP00000251453,ENSP00000290158,ENSP00000311121,ENSP00000325875,ENSP00000346067,ENSP00000351777,ENSP00000362744,ENSP00000376176,ENSP00000379888,ENSP00000419425,ENSP00000426909,ENSP00000433821	GNB2L1,HSP90AB1,KPNB1,PPIA,PSMA8,RAN,RPS16,RPS3,RPS4X,RPS8,RPSA,VCP
GO.0071822	protein complex subunit organization	16	0.000146	ENSP00000251453,ENSP00000252699,ENSP00000299218,ENSP00000301072,ENSP00000302961,ENSP00000315130,ENSP00000335153,ENSP00000336927,ENSP00000338934,ENSP00000346067,ENSP00000350894,ENSP00000351777,ENSP00000362744,ENSP00000376176,ENSP00000379888,ENSP00000433821	ACTN4,ALDOA,CAND1,CLU,EZR,HSP90AA1,HSPA4,RAN,RPS16,RPS3,RPS4X,RPS8,RPSA,SERPINH1,TUBA1C,VCP
GO.1902578	single-organism localization	23	0.000146	ENSP00000211998,ENSP00000225655,ENSP00000251453,ENSP00000252699,ENSP00000256119,ENSP00000262982,ENSP00000269122,ENSP00000290158,ENSP00000301072,ENSP00000302961,ENSP00000315130,ENSP00000325875,ENSP00000335153,ENSP00000336927,ENSP00000346067,ENSP00000355785,ENSP00000362744,ENSP00000362817,ENSP00000367123,ENSP00000376176,ENSP00000379888,ENSP00000419425,ENSP00000433821	ACTN4,ALDOA,CA1,CLTC,CLU,CSE1L,FABP3,HSP90AA1,HSP90AB1,HSPA4,KPNB1,LEFTY2,PFN1,PPIA,RAN,RPS16,RPS3,RPS4X,RPS8,RPSA,SLC3A2,TUBA1C,VCL
GO.0071702	organic substance transport	18	0.000176	ENSP00000251453,ENSP00000252699,ENSP00000256119,ENSP00000262982,ENSP00000269122,ENSP00000302961,ENSP00000315130,ENSP00000335153,ENSP00000338934,ENSP00000346067,ENSP00000351777,ENSP00000362744,ENSP00000362817,ENSP00000367123,ENSP00000369538,ENSP00000376176,ENSP00000379888,ENSP00000433821	ACTN4,CA1,CLTC,CLU,CSE1L,EZR,FABP3,GDI2,HSP90AA1,HSPA4,RAN,RPS16,RPS3,RPS4X,RPS8,RPSA,SLC3A2,VCP
GO.0008104	protein localization	17	0.000192	ENSP00000211998,ENSP00000251453,ENSP00000252699,ENSP00000262982,ENSP00000269122,ENSP00000302961,ENSP00000315130,ENSP00000335153,ENSP00000338934,ENSP00000346067,ENSP00000351777,ENSP00000362744,ENSP00000369538,ENSP00000370297,ENSP00000376176,ENSP00000379888,ENSP00000433821	ACTN4,CER1,CLTC,CLU,CSE1L,EZR,GDI2,HSP90AA1,HSPA4,RAN,RPS16,RPS3,RPS4X,RPS8,RPSA,VCL,VCP
GO.0072594	establishment of protein localization to organelle	9	0.000192	ENSP00000251453,ENSP00000290158,ENSP00000302961,ENSP00000335153,ENSP00000346067,ENSP00000362744,ENSP00000376176,ENSP00000379888,ENSP00000433821	HSP90AA1,HSPA4,KPNB1,RAN,RPS16,RPS3,RPS4X,RPS8,RPSA
GO.0034613	cellular protein localization	14	0.00026	ENSP00000211998,ENSP00000251453,ENSP00000262982,ENSP00000269122,ENSP00000290158,ENSP00000302961,ENSP00000335153,ENSP00000338934,ENSP00000346067,ENSP00000351777,ENSP00000362744,ENSP00000376176,ENSP00000379888,ENSP00000433821	CLTC,CSE1L,EZR,HSP90AA1,HSPA4,KPNB1,RAN,RPS16,RPS3,RPS4X,RPS8,RPSA,VCL,VCP
GO.0016192	vesicle-mediated transport	14	0.000263	ENSP00000211998,ENSP00000225655,ENSP00000252699,ENSP00000269122,ENSP00000315130,ENSP00000318195,ENSP00000325875,ENSP00000335153,ENSP00000336927,ENSP00000338934,ENSP00000351777,ENSP00000355785,ENSP00000369538,ENSP00000419425	ACTN4,ALDOA,CLTC,CLU,EZR,GDI2,HSP90AA1,HSP90AB1,LEFTY2,NCL,PFN1,PPIA,VCL,VCP
GO.0006414	translational elongation	7	0.000372	ENSP00000251453,ENSP00000307940,ENSP00000331901,ENSP00000346067,ENSP00000362744,ENSP00000379888,ENSP00000433821	EEF1G,EEF2,RPS16,RPS3,RPS4X,RPS8,RPSA
GO.0033036	macromolecule localization	18	0.000374	ENSP00000211998,ENSP00000251453,ENSP00000252699,ENSP00000262982,ENSP00000269122,ENSP00000302961,ENSP00000315130,ENSP00000335153,ENSP00000338934,ENSP00000346067,ENSP00000351777,ENSP00000362744,ENSP00000362817,ENSP00000369538,ENSP00000370297,ENSP00000376176,ENSP00000379888,ENSP00000433821	ACTN4,CER1,CLTC,CLU,CSE1L,EZR,FABP3,GDI2,HSP90AA1,HSPA4,RAN,RPS16,RPS3,RPS4X,RPS8,RPSA,VCL,VCP
GO.0006605	protein targeting	9	0.000503	ENSP00000251453,ENSP00000290158,ENSP00000302961,ENSP00000335153,ENSP00000346067,ENSP00000362744,ENSP00000376176,ENSP00000379888,ENSP00000433821	HSP90AA1,HSPA4,KPNB1,RAN,RPS16,RPS3,RPS4X,RPS8,RPSA
GO.0015031	protein transport	14	0.000503	ENSP00000251453,ENSP00000252699,ENSP00000262982,ENSP00000269122,ENSP00000302961,ENSP00000315130,ENSP00000335153,ENSP00000346067,ENSP00000351777,ENSP00000362744,ENSP00000369538,ENSP00000376176,ENSP00000379888,ENSP00000433821	ACTN4,CLTC,CLU,CSE1L,GDI2,HSP90AA1,HSPA4,RAN,RPS16,RPS3,RPS4X,RPS8,RPSA,VCP
GO.0044248	cellular catabolic process	15	0.000549	ENSP00000052754,ENSP00000217426,ENSP00000251453,ENSP00000262746,ENSP00000290158,ENSP00000311121,ENSP00000313199,ENSP00000338413,ENSP00000346067,ENSP00000351777,ENSP00000357721,ENSP00000362744,ENSP00000362817,ENSP00000379888,ENSP00000433821	AHCY,DCN,FABP3,HNRNPD,KPNB1,PRDX1,PSMA8,RPS16,RPS3,RPS4X,RPS8,RPSA,S100A8,UBA1,VCP
GO.1901575	organic substance catabolic process	15	0.00097	ENSP00000052754,ENSP00000217426,ENSP00000251453,ENSP00000290158,ENSP00000311121,ENSP00000313199,ENSP00000336927,ENSP00000338413,ENSP00000342026,ENSP00000346067,ENSP00000351777,ENSP00000362744,ENSP00000362817,ENSP00000379888,ENSP00000433821	AHCY,ALDOA,DCN,FABP3,HNRNPD,KPNB1,PRDX6,PSMA8,RPS16,RPS3,RPS4X,RPS8,RPSA,UBA1,VCP
GO.0010033	response to organic substance	19	0.000975	ENSP00000052754,ENSP00000260985,ENSP00000290158,ENSP00000301072,ENSP00000302961,ENSP00000304592,ENSP00000315130,ENSP00000318195,ENSP00000335153,ENSP00000350894,ENSP00000351777,ENSP00000355785,ENSP00000357721,ENSP00000362817,ENSP00000367123,ENSP00000368438,ENSP00000370074,ENSP00000370297,ENSP00000376176	CER1,CLU,DCN,FABP3,FASN,HSP90AA1,HSPA4,IDH1,KPNB1,LEFTY2,NCL,PCNA,RAN,S100A8,SERPINB9,SERPINH1,SLC3A2,TUBA1C,VCP
GO.0034655	nucleobase-containing compound catabolic process	8	0.000975	ENSP00000217426,ENSP00000251453,ENSP00000290158,ENSP00000313199,ENSP00000346067,ENSP00000362744,ENSP00000379888,ENSP00000433821	AHCY,HNRNPD,KPNB1,RPS16,RPS3,RPS4X,RPS8,RPSA
GO.0030168	platelet activation	7	0.000987	ENSP00000211998,ENSP00000225655,ENSP00000252699,ENSP00000315130,ENSP00000336927,ENSP00000355785,ENSP00000419425	ACTN4,ALDOA,CLU,LEFTY2,PFN1,PPIA,VCL
GO.0009056	catabolic process	16	0.000988	ENSP00000052754,ENSP00000217426,ENSP00000251453,ENSP00000262746,ENSP00000290158,ENSP00000311121,ENSP00000313199,ENSP00000336927,ENSP00000338413,ENSP00000346067,ENSP00000351777,ENSP00000357721,ENSP00000362744,ENSP00000362817,ENSP00000379888,ENSP00000433821	AHCY,ALDOA,DCN,FABP3,HNRNPD,KPNB1,PRDX1,PSMA8,RPS16,RPS3,RPS4X,RPS8,RPSA,S100A8,UBA1,VCP
GO.1901566	organonitrogen compound biosynthetic process	12	0.000995	ENSP00000052754,ENSP00000217426,ENSP00000251453,ENSP00000262030,ENSP00000307940,ENSP00000331901,ENSP00000336927,ENSP00000346067,ENSP00000365773,ENSP00000382595,ENSP00000433821,ENSP00000450560	AHCY,ALDOA,ATP5B,DCN,EEF1G,EEF2,MTHFD1,PAICS,PSAT1,RPS16,RPS3,RPSA
GO.1902582	single-organism intracellular transport	13	0.000995	ENSP00000251453,ENSP00000262030,ENSP00000262982,ENSP00000269122,ENSP00000290158,ENSP00000301072,ENSP00000302961,ENSP00000335153,ENSP00000346067,ENSP00000362744,ENSP00000376176,ENSP00000379888,ENSP00000433821	ATP5B,CLTC,CSE1L,HSP90AA1,HSPA4,KPNB1,RAN,RPS16,RPS3,RPS4X,RPS8,RPSA,TUBA1C
GO.0090150	establishment of protein localization to membrane	7	0.00129	ENSP00000251453,ENSP00000302961,ENSP00000335153,ENSP00000346067,ENSP00000362744,ENSP00000379888,ENSP00000433821	HSP90AA1,HSPA4,RPS16,RPS3,RPS4X,RPS8,RPSA
GO.0051131	chaperone-mediated protein complex assembly	3	0.00145	ENSP00000302961,ENSP00000315130,ENSP00000335153	CLU,HSP90AA1,HSPA4
GO.0051179	localization	25	0.00145	ENSP00000211998,ENSP00000225655,ENSP00000251453,ENSP00000256119,ENSP00000262982,ENSP00000269122,ENSP00000301072,ENSP00000302961,ENSP00000315130,ENSP00000318195,ENSP00000325875,ENSP00000335153,ENSP00000336927,ENSP00000346067,ENSP00000355785,ENSP00000357721,ENSP00000362744,ENSP00000362817,ENSP00000367123,ENSP00000369538,ENSP00000370297,ENSP00000376176,ENSP00000379888,ENSP00000419425,ENSP00000433821	ALDOA,CA1,CER1,CLTC,CLU,CSE1L,FABP3,GDI2,HSP90AA1,HSP90AB1,HSPA4,LEFTY2,NCL,PFN1,PPIA,RAN,RPS16,RPS3,RPS4X,RPS8,RPSA,S100A8,SLC3A2,TUBA1C,VCL
GO.0035966	response to topologically incorrect protein	6	0.00147	ENSP00000302961,ENSP00000315130,ENSP00000325875,ENSP00000335153,ENSP00000350894,ENSP00000351777	CLU,HSP90AA1,HSP90AB1,HSPA4,SERPINH1,VCP
GO.0033365	protein localization to organelle	9	0.0019	ENSP00000251453,ENSP00000290158,ENSP00000302961,ENSP00000335153,ENSP00000346067,ENSP00000362744,ENSP00000376176,ENSP00000379888,ENSP00000433821	HSP90AA1,HSPA4,KPNB1,RAN,RPS16,RPS3,RPS4X,RPS8,RPSA
GO.0042060	wound healing	10	0.0019	ENSP00000052754,ENSP00000211998,ENSP00000225655,ENSP00000252699,ENSP00000315130,ENSP00000336927,ENSP00000355785,ENSP00000357721,ENSP00000367123,ENSP00000419425	ACTN4,ALDOA,CLU,DCN,LEFTY2,PFN1,PPIA,S100A8,SLC3A2,VCL
GO.0016482	cytoplasmic transport	10	0.00254	ENSP00000251453,ENSP00000262982,ENSP00000290158,ENSP00000302961,ENSP00000335153,ENSP00000346067,ENSP00000362744,ENSP00000376176,ENSP00000379888,ENSP00000433821	CSE1L,HSP90AA1,HSPA4,KPNB1,RAN,RPS16,RPS3,RPS4X,RPS8,RPSA
GO.0006614	SRP-dependent cotranslational protein targeting to membrane	5	0.00277	ENSP00000251453,ENSP00000346067,ENSP00000362744,ENSP00000379888,ENSP00000433821	RPS16,RPS3,RPS4X,RPS8,RPSA
GO.0051704	multi-organism process	17	0.00277	ENSP00000052754,ENSP00000251453,ENSP00000290158,ENSP00000311121,ENSP00000315130,ENSP00000318195,ENSP00000325875,ENSP00000331901,ENSP00000346067,ENSP00000351777,ENSP00000362744,ENSP00000370074,ENSP00000376176,ENSP00000379888,ENSP00000419425,ENSP00000426909,ENSP00000433821	CLU,DCN,EEF1G,GNB2L1,HSP90AB1,KPNB1,NCL,PPIA,PSMA8,RAN,RPS16,RPS3,RPS4X,RPS8,RPSA,SERPINB9,VCP
GO.0009057	macromolecule catabolic process	11	0.00284	ENSP00000052754,ENSP00000251453,ENSP00000290158,ENSP00000311121,ENSP00000313199,ENSP00000338413,ENSP00000346067,ENSP00000351777,ENSP00000362744,ENSP00000379888,ENSP00000433821	DCN,HNRNPD,KPNB1,PSMA8,RPS16,RPS3,RPS4X,RPS8,RPSA,UBA1,VCP
GO.0044711	single-organism biosynthetic process	13	0.00296	ENSP00000052754,ENSP00000217426,ENSP00000262030,ENSP00000304592,ENSP00000307940,ENSP00000336927,ENSP00000338703,ENSP00000350894,ENSP00000351777,ENSP00000365773,ENSP00000368438,ENSP00000382595,ENSP00000450560	AHCY,ALDOA,ATP5B,DCN,EEF2,FASN,MTHFD1,PAICS,PCNA,PSAT1,SERPINH1,UGP2,VCP
GO.0019083	viral transcription	5	0.00299	ENSP00000251453,ENSP00000346067,ENSP00000362744,ENSP00000379888,ENSP00000433821	RPS16,RPS3,RPS4X,RPS8,RPSA
GO.0000184	nuclear-transcribed mRNA catabolic process, nonsense-mediated decay	5	0.00335	ENSP00000251453,ENSP00000346067,ENSP00000362744,ENSP00000379888,ENSP00000433821	RPS16,RPS3,RPS4X,RPS8,RPSA
GO.0044265	cellular macromolecule catabolic process	10	0.00395	ENSP00000251453,ENSP00000290158,ENSP00000311121,ENSP00000313199,ENSP00000338413,ENSP00000346067,ENSP00000351777,ENSP00000362744,ENSP00000379888,ENSP00000433821	HNRNPD,KPNB1,PSMA8,RPS16,RPS3,RPS4X,RPS8,RPSA,UBA1,VCP
GO.0019080	viral gene expression	5	0.00397	ENSP00000251453,ENSP00000346067,ENSP00000362744,ENSP00000379888,ENSP00000433821	RPS16,RPS3,RPS4X,RPS8,RPSA
GO.0006401	RNA catabolic process	6	0.00425	ENSP00000251453,ENSP00000313199,ENSP00000346067,ENSP00000362744,ENSP00000379888,ENSP00000433821	HNRNPD,RPS16,RPS3,RPS4X,RPS8,RPSA
GO.0017038	protein import	5	0.00507	ENSP00000290158,ENSP00000302961,ENSP00000315130,ENSP00000335153,ENSP00000376176	CLU,HSP90AA1,HSPA4,KPNB1,RAN
GO.1902580	single-organism cellular localization	10	0.00668	ENSP00000251453,ENSP00000252699,ENSP00000290158,ENSP00000302961,ENSP00000335153,ENSP00000346067,ENSP00000362744,ENSP00000376176,ENSP00000379888,ENSP00000433821	ACTN4,HSP90AA1,HSPA4,KPNB1,RAN,RPS16,RPS3,RPS4X,RPS8,RPSA
GO.0072657	protein localization to membrane	7	0.00775	ENSP00000251453,ENSP00000302961,ENSP00000335153,ENSP00000346067,ENSP00000362744,ENSP00000379888,ENSP00000433821	HSP90AA1,HSPA4,RPS16,RPS3,RPS4X,RPS8,RPSA
GO.0044085	cellular component biogenesis	15	0.00841	ENSP00000211998,ENSP00000251453,ENSP00000252699,ENSP00000299218,ENSP00000301072,ENSP00000302886,ENSP00000302961,ENSP00000315130,ENSP00000335153,ENSP00000336927,ENSP00000346067,ENSP00000351777,ENSP00000376176,ENSP00000379888,ENSP00000419425	ACTN4,ALDOA,CAND1,CLU,HSP90AA1,HSPA4,PA2G4,PPIA,RAN,RPS16,RPS8,RPSA,TUBA1C,VCL,VCP
GO.0045040	protein import into mitochondrial outer membrane	2	0.00842	ENSP00000302961,ENSP00000335153	HSP90AA1,HSPA4
GO.0046394	carboxylic acid biosynthetic process	6	0.00846	ENSP00000052754,ENSP00000217426,ENSP00000304592,ENSP00000338703,ENSP00000365773,ENSP00000450560	AHCY,DCN,FASN,MTHFD1,PSAT1,UGP2
GO.0006986	response to unfolded protein	5	0.00896	ENSP00000302961,ENSP00000325875,ENSP00000335153,ENSP00000350894,ENSP00000351777	HSP90AA1,HSP90AB1,HSPA4,SERPINH1,VCP
GO.0071353	cellular response to interleukin-4	3	0.00944	ENSP00000301072,ENSP00000304592,ENSP00000325875	FASN,HSP90AB1,TUBA1C
GO.0007596	blood coagulation	8	0.00945	ENSP00000211998,ENSP00000225655,ENSP00000252699,ENSP00000315130,ENSP00000336927,ENSP00000355785,ENSP00000367123,ENSP00000419425	ACTN4,ALDOA,CLU,LEFTY2,PFN1,PPIA,SLC3A2,VCL
GO.0042221	response to chemical	21	0.0115	ENSP00000052754,ENSP00000260985,ENSP00000290158,ENSP00000301072,ENSP00000302961,ENSP00000304592,ENSP00000315130,ENSP00000318195,ENSP00000335153,ENSP00000338703,ENSP00000338934,ENSP00000342026,ENSP00000350894,ENSP00000351777,ENSP00000355785,ENSP00000362817,ENSP00000367123,ENSP00000368438,ENSP00000370074,ENSP00000370297,ENSP00000376176	CER1,CLU,DCN,EZR,FABP3,FASN,HSP90AA1,HSPA4,IDH1,KPNB1,LEFTY2,NCL,PCNA,PRDX6,RAN,SERPINB9,SERPINH1,SLC3A2,TUBA1C,UGP2,VCP
GO.1903364	positive regulation of cellular protein catabolic process	5	0.0122	ENSP00000311121,ENSP00000315130,ENSP00000338934,ENSP00000351777,ENSP00000426909	CLU,EZR,GNB2L1,PSMA8,VCP
GO.0072524	pyridine-containing compound metabolic process	4	0.0131	ENSP00000229319,ENSP00000260985,ENSP00000336927,ENSP00000365773	ALDOA,IDH1,LDHB,PSAT1
GO.0009893	positive regulation of metabolic process	20	0.0137	ENSP00000052754,ENSP00000225655,ENSP00000299218,ENSP00000304592,ENSP00000307940,ENSP00000311121,ENSP00000313199,ENSP00000315130,ENSP00000335153,ENSP00000338934,ENSP00000351777,ENSP00000355785,ENSP00000357721,ENSP00000362817,ENSP00000368438,ENSP00000369538,ENSP00000370074,ENSP00000376176,ENSP00000426909,ENSP00000433821	CAND1,CLU,DCN,EEF2,EZR,FABP3,FASN,GDI2,GNB2L1,HNRNPD,HSP90AA1,LEFTY2,PCNA,PFN1,PSMA8,RAN,RPS3,S100A8,SERPINB9,VCP
GO.0006415	translational termination	5	0.0144	ENSP00000251453,ENSP00000346067,ENSP00000362744,ENSP00000379888,ENSP00000433821	RPS16,RPS3,RPS4X,RPS8,RPSA
GO.1901564	organonitrogen compound metabolic process	13	0.0144	ENSP00000229319,ENSP00000251453,ENSP00000262030,ENSP00000299198,ENSP00000304592,ENSP00000307940,ENSP00000331901,ENSP00000336927,ENSP00000346067,ENSP00000365773,ENSP00000382595,ENSP00000433821,ENSP00000450560	ALDOA,ATP5B,CKB,EEF1G,EEF2,FASN,LDHB,MTHFD1,PAICS,PSAT1,RPS16,RPS3,RPSA
GO.0006730	one-carbon metabolic process	3	0.0146	ENSP00000217426,ENSP00000256119,ENSP00000450560	AHCY,CA1,MTHFD1
GO.0009069	serine family amino acid metabolic process	3	0.0157	ENSP00000217426,ENSP00000365773,ENSP00000450560	AHCY,MTHFD1,PSAT1
GO.0034248	regulation of cellular amide metabolic process	6	0.0166	ENSP00000302886,ENSP00000307940,ENSP00000313199,ENSP00000315130,ENSP00000426909,ENSP00000433821	CLU,EEF2,GNB2L1,HNRNPD,PA2G4,RPS3
GO.0045429	positive regulation of nitric oxide biosynthetic process	3	0.0166	ENSP00000315130,ENSP00000325875,ENSP00000335153	CLU,HSP90AA1,HSP90AB1
GO.0043603	cellular amide metabolic process	8	0.0168	ENSP00000251453,ENSP00000260985,ENSP00000304592,ENSP00000307940,ENSP00000331901,ENSP00000346067,ENSP00000433821,ENSP00000450560	EEF1G,EEF2,FASN,IDH1,MTHFD1,RPS16,RPS3,RPSA
GO.1903362	regulation of cellular protein catabolic process	6	0.0174	ENSP00000311121,ENSP00000315130,ENSP00000325875,ENSP00000338934,ENSP00000351777,ENSP00000426909	CLU,EZR,GNB2L1,HSP90AB1,PSMA8,VCP
GO.0019752	carboxylic acid metabolic process	9	0.0176	ENSP00000052754,ENSP00000260985,ENSP00000299198,ENSP00000304592,ENSP00000336927,ENSP00000338703,ENSP00000362817,ENSP00000365773,ENSP00000450560	ALDOA,CKB,DCN,FABP3,FASN,IDH1,MTHFD1,PSAT1,UGP2
GO.0042254	ribosome biogenesis	5	0.0176	ENSP00000251453,ENSP00000302886,ENSP00000346067,ENSP00000376176,ENSP00000379888	PA2G4,RAN,RPS16,RPS8,RPSA
GO.0042274	ribosomal small subunit biogenesis	3	0.0197	ENSP00000251453,ENSP00000346067,ENSP00000379888	RPS16,RPS8,RPSA
GO.0044763	single-organism cellular process	37	0.0197	ENSP00000211998,ENSP00000251453,ENSP00000256119,ENSP00000260985,ENSP00000262746,ENSP00000262982,ENSP00000269122,ENSP00000290158,ENSP00000299218,ENSP00000301072,ENSP00000302886,ENSP00000302961,ENSP00000304592,ENSP00000311121,ENSP00000315130,ENSP00000325875,ENSP00000335153,ENSP00000336927,ENSP00000338703,ENSP00000338934,ENSP00000346067,ENSP00000351777,ENSP00000355785,ENSP00000357721,ENSP00000362744…	ALDOA,CA1,CAND1,CER1,CLTC,CLU,CSE1L,EZR,FASN,GDI2,HSP90AA1,HSP90AB1,HSPA4,IDH1,KPNB1,LEFTY2,MTHFD1,PA2G4,PAICS,PCNA,PPIA,PRDX1,PSAT1,PSMA8,RAN,RPS16,RPS3,RPS4X,RPS8,RPSA,S100A8,SERPINB9,SLC3A2,TUBA1C,UGP2,VCL,VCP
GO.0009117	nucleotide metabolic process	7	0.0202	ENSP00000229319,ENSP00000260985,ENSP00000262030,ENSP00000336927,ENSP00000338703,ENSP00000382595,ENSP00000450560	ALDOA,ATP5B,IDH1,LDHB,MTHFD1,PAICS,UGP2
GO.0009165	nucleotide biosynthetic process	5	0.0218	ENSP00000262030,ENSP00000336927,ENSP00000338703,ENSP00000382595,ENSP00000450560	ALDOA,ATP5B,MTHFD1,PAICS,UGP2
GO.0071428	rRNA-containing ribonucleoprotein complex export from nucleus	2	0.0251	ENSP00000346067,ENSP00000376176	RAN,RPSA
GO.0031325	positive regulation of cellular metabolic process	17	0.026	ENSP00000052754,ENSP00000299218,ENSP00000304592,ENSP00000307940,ENSP00000311121,ENSP00000313199,ENSP00000315130,ENSP00000335153,ENSP00000338934,ENSP00000351777,ENSP00000355785,ENSP00000357721,ENSP00000362817,ENSP00000368438,ENSP00000376176,ENSP00000426909,ENSP00000433821	CAND1,CLU,DCN,EEF2,EZR,FABP3,FASN,GNB2L1,HNRNPD,HSP90AA1,LEFTY2,PCNA,PSMA8,RAN,RPS3,S100A8,VCP
GO.0061024	membrane organization	9	0.0304	ENSP00000251453,ENSP00000269122,ENSP00000302961,ENSP00000315130,ENSP00000335153,ENSP00000346067,ENSP00000362744,ENSP00000379888,ENSP00000433821	CLTC,CLU,HSP90AA1,HSPA4,RPS16,RPS3,RPS4X,RPS8,RPSA
GO.1990542	mitochondrial transmembrane transport	3	0.0326	ENSP00000262030,ENSP00000302961,ENSP00000335153	ATP5B,HSP90AA1,HSPA4
GO.0022411	cellular component disassembly	7	0.0334	ENSP00000052754,ENSP00000251453,ENSP00000290158,ENSP00000346067,ENSP00000362744,ENSP00000379888,ENSP00000433821	DCN,KPNB1,RPS16,RPS3,RPS4X,RPS8,RPSA
GO.0044802	single-organism membrane organization	8	0.0335	ENSP00000251453,ENSP00000302961,ENSP00000315130,ENSP00000335153,ENSP00000346067,ENSP00000362744,ENSP00000379888,ENSP00000433821	CLU,HSP90AA1,HSPA4,RPS16,RPS3,RPS4X,RPS8,RPSA
GO.0006413	translational initiation	5	0.0347	ENSP00000251453,ENSP00000346067,ENSP00000362744,ENSP00000379888,ENSP00000433821	RPS16,RPS3,RPS4X,RPS8,RPSA
GO.0006732	coenzyme metabolic process	5	0.0367	ENSP00000217426,ENSP00000229319,ENSP00000260985,ENSP00000336927,ENSP00000450560	AHCY,ALDOA,IDH1,LDHB,MTHFD1
GO.0031329	regulation of cellular catabolic process	8	0.0367	ENSP00000052754,ENSP00000260985,ENSP00000311121,ENSP00000315130,ENSP00000325875,ENSP00000338934,ENSP00000351777,ENSP00000426909	CLU,DCN,EZR,GNB2L1,HSP90AB1,IDH1,PSMA8,VCP
GO.0071840	cellular component organization or biogenesis	23	0.0367	ENSP00000052754,ENSP00000211998,ENSP00000251453,ENSP00000252699,ENSP00000262030,ENSP00000269122,ENSP00000290158,ENSP00000299218,ENSP00000301072,ENSP00000302886,ENSP00000302961,ENSP00000315130,ENSP00000325875,ENSP00000335153,ENSP00000336927,ENSP00000346067,ENSP00000350894,ENSP00000351777,ENSP00000362744,ENSP00000368438,ENSP00000379888,ENSP00000419425,ENSP00000433821	ACTN4,ALDOA,ATP5B,CAND1,CLTC,CLU,DCN,HSP90AA1,HSP90AB1,HSPA4,KPNB1,PA2G4,PCNA,PPIA,RPS16,RPS3,RPS4X,RPS8,RPSA,SERPINH1,TUBA1C,VCL,VCP
GO.0006807	nitrogen compound metabolic process	25	0.0368	ENSP00000229319,ENSP00000251453,ENSP00000262030,ENSP00000262746,ENSP00000290158,ENSP00000299198,ENSP00000302886,ENSP00000304592,ENSP00000307940,ENSP00000311121,ENSP00000313199,ENSP00000331901,ENSP00000335153,ENSP00000336927,ENSP00000338703,ENSP00000346067,ENSP00000351777,ENSP00000365773,ENSP00000368438,ENSP00000376176,ENSP00000379888,ENSP00000382595,ENSP00000419425,ENSP00000433821,ENSP00000450560	ALDOA,ATP5B,CKB,EEF1G,EEF2,FASN,HNRNPD,HSP90AA1,KPNB1,LDHB,MTHFD1,PA2G4,PAICS,PCNA,PPIA,PRDX1,PSAT1,PSMA8,RAN,RPS16,RPS3,RPS8,RPSA,UGP2,VCP
GO.0006164	purine nucleotide biosynthetic process	4	0.0372	ENSP00000262030,ENSP00000336927,ENSP00000382595,ENSP00000450560	ALDOA,ATP5B,MTHFD1,PAICS
GO.0031323	regulation of cellular metabolic process	25	0.0372	ENSP00000052754,ENSP00000225655,ENSP00000252699,ENSP00000260985,ENSP00000262746,ENSP00000299218,ENSP00000302886,ENSP00000304592,ENSP00000307940,ENSP00000311121,ENSP00000313199,ENSP00000315130,ENSP00000335153,ENSP00000338934,ENSP00000350894,ENSP00000351777,ENSP00000355785,ENSP00000357721,ENSP00000362817,ENSP00000368438,ENSP00000370074,ENSP00000370297,ENSP00000376176,ENSP00000426909,ENSP00000433821	ACTN4,CAND1,CER1,CLU,DCN,EEF2,EZR,FABP3,FASN,GNB2L1,HNRNPD,HSP90AA1,IDH1,LEFTY2,PA2G4,PCNA,PFN1,PRDX1,PSMA8,RAN,RPS3,S100A8,SERPINB9,SERPINH1,VCP
GO.0034641	cellular nitrogen compound metabolic process	24	0.0375	ENSP00000229319,ENSP00000251453,ENSP00000262030,ENSP00000262746,ENSP00000290158,ENSP00000299198,ENSP00000302886,ENSP00000304592,ENSP00000307940,ENSP00000311121,ENSP00000313199,ENSP00000331901,ENSP00000336927,ENSP00000338703,ENSP00000346067,ENSP00000351777,ENSP00000365773,ENSP00000368438,ENSP00000376176,ENSP00000379888,ENSP00000382595,ENSP00000419425,ENSP00000433821,ENSP00000450560	ALDOA,ATP5B,CKB,EEF1G,EEF2,FASN,HNRNPD,KPNB1,LDHB,MTHFD1,PA2G4,PAICS,PCNA,PPIA,PRDX1,PSAT1,PSMA8,RAN,RPS16,RPS3,RPS8,RPSA,UGP2,VCP
GO.0042981	regulation of apoptotic process	11	0.0427	ENSP00000252699,ENSP00000302886,ENSP00000311121,ENSP00000315130,ENSP00000318195,ENSP00000325875,ENSP00000351777,ENSP00000355785,ENSP00000357721,ENSP00000370074,ENSP00000433821	ACTN4,CLU,HSP90AB1,LEFTY2,NCL,PA2G4,PSMA8,RPS3,S100A8,SERPINB9,VCP
GO.0065008	regulation of biological quality	17	0.0434	ENSP00000211998,ENSP00000225655,ENSP00000252699,ENSP00000262030,ENSP00000299198,ENSP00000313199,ENSP00000315130,ENSP00000325875,ENSP00000336927,ENSP00000355785,ENSP00000357721,ENSP00000362817,ENSP00000367123,ENSP00000368438,ENSP00000370074,ENSP00000370297,ENSP00000419425	ACTN4,ALDOA,ATP5B,CER1,CKB,CLU,FABP3,HNRNPD,HSP90AB1,LEFTY2,PCNA,PFN1,PPIA,S100A8,SERPINB9,SLC3A2,VCL
GO.0006364	rRNA processing	4	0.0449	ENSP00000251453,ENSP00000302886,ENSP00000346067,ENSP00000379888	PA2G4,RPS16,RPS8,RPSA
GO.0071071	regulation of phospholipid biosynthetic process	2	0.0471	ENSP00000260985,ENSP00000362817	FABP3,IDH1
GO.0032434	regulation of proteasomal ubiquitin-dependent protein catabolic process	4	0.0477	ENSP00000315130,ENSP00000325875,ENSP00000351777,ENSP00000426909	CLU,GNB2L1,HSP90AB1,VCP
